# Supplementary material
Source: HighWire-hosted journal article supplement (https://gut.bmj.com/content/69/1/92)
Supplement: inline-supplementary-material-2 [file inline-supplementary-material-2.xlsx]

## Sheet: for_maaslin_v7_noSp
	Variable	Feature	Value	Coefficient	N	N.not.0	P.value	Q.value
1	Age	k__Bacteria|f__Firmicutes|c__Bacilli|o__Lactobacillales|f__Streptococcaceae|g__Streptococcus	Age	-0.000571620311970825	111	104	0.00134642702136394	0.0714314967123605
2	Age	k__Bacteria|f__Firmicutes|c__Bacilli|o__Lactobacillales|f__Streptococcaceae	Age	-0.000586003856064045	111	105	0.0014573002806157	0.0753312145056729
3	Age	k__Bacteria|f__Firmicutes|c__Bacilli|o__Lactobacillales	Age	-0.000675885795553474	111	106	0.00259142500622625	0.109329357102164
4	Age	k__Bacteria|f__Actinobacteria|c__Actinobacteria	Age	-0.0027422184932612	111	110	0.00319781791907048	0.120711439170856
5	Age	k__Bacteria|f__Firmicutes|c__Clostridia|o__Clostridiales|f__Lachnospiraceae|g___Eubacterium_eligensgroup	Age	0.000644279983319358	111	60	0.00325894512177448	0.120711439170856
6	Age	k__Bacteria|f__Actinobacteria|c__Actinobacteria|o__Bifidobacteriales	Age	-0.00275117340073379	111	109	0.00329321882658586	0.120711439170856
7	Age	k__Bacteria|f__Actinobacteria|c__Actinobacteria|o__Bifidobacteriales|f__Bifidobacteriaceae	Age	-0.00275117340073379	111	109	0.00329321882658586	0.120711439170856
8	Age	k__Bacteria|f__Actinobacteria|c__Actinobacteria|o__Bifidobacteriales|f__Bifidobacteriaceae|g__Bifidobacterium	Age	-0.00273545598727839	111	107	0.00356978323499918	0.126257596522076
9	Age	k__Bacteria|f__Firmicutes|c__Clostridia|o__Clostridiales|f__FamilyXI	Age	-0.000383988742821173	111	75	0.00369882950408837	0.128566211728313
10	Age	k__Bacteria|f__Tenericutes	Age	0.000443316756591099	111	41	0.0056876084271966	0.159253035961505
11	Age	k__Bacteria|f__Tenericutes|c__Mollicutes	Age	0.000443316756591099	111	41	0.0056876084271966	0.159253035961505
12	Age	k__Bacteria|f__Firmicutes|c__Clostridia	Age	0.00398110245865078	111	111	0.0071731993125089	0.176355729439243
13	Age	k__Bacteria|f__Firmicutes|c__Clostridia|o__Clostridiales	Age	0.00398110245865078	111	111	0.0071731993125089	0.176355729439243
14	Age	k__Bacteria|f__Firmicutes|c__Clostridia|o__Clostridiales|f__FamilyXI|g__Ezakiella	Age	-0.000261214560353327	111	40	0.0106293290188867	0.232920948935604
15	CHOLECYSTECTOMY	k__Bacteria|f__Firmicutes|c__Erysipelotrichia	CHOLECYSTECTOMYyes	0.0494446123551237	111	92	0.000145185071450955	0.0195128736030083
16	CHOLECYSTECTOMY	k__Bacteria|f__Firmicutes|c__Erysipelotrichia|o__Erysipelotrichales	CHOLECYSTECTOMYyes	0.0494446123551237	111	92	0.000145185071450955	0.0195128736030083
17	CHOLECYSTECTOMY	k__Bacteria|f__Firmicutes|c__Erysipelotrichia|o__Erysipelotrichales|f__Erysipelotrichaceae	CHOLECYSTECTOMYyes	0.0494446123551237	111	92	0.000145185071450955	0.0195128736030083
18	CHOLECYSTECTOMY	k__Bacteria|f__Firmicutes|c__Clostridia|o__Clostridiales|f__Lachnospiraceae|g__Blautia	CHOLECYSTECTOMYyes	0.0581319836978158	111	108	0.00291536260909869	0.117547420398859
19	Fibrates	k__Bacteria|f__Firmicutes|c__Negativicutes|o__Selenomonadales|f__Acidaminococcaceae|g__Phascolarctobacterium	Fibratesyes	0.0833911805738798	111	18	1.09206036227205e-09	2.20159369034044e-06
20	Fibrates	k__Bacteria|f__Firmicutes|c__Negativicutes|o__Selenomonadales|f__Acidaminococcaceae	Fibratesyes	0.0815281147358843	111	22	4.23601448498872e-08	4.26990260086863e-05
21	Fibrates	k__Bacteria|f__Bacteroidetes|c__Bacteroidia|o__Bacteroidales|f__Rikenellaceae|g__RikenellaceaeRC9gutgroup	Fibratesyes	0.152808430794887	111	18	0.00501699522269138	0.150959139835012
22	IBD_yn	k__Bacteria|f__Tenericutes	IBD_ynyes	-0.0199415636871713	111	41	1.30088457537265e-06	0.000655645825987817
23	IBD_yn	k__Bacteria|f__Tenericutes|c__Mollicutes	IBD_ynyes	-0.0199415636871713	111	41	1.30088457537265e-06	0.000655645825987817
24	IBD_yn	k__Bacteria|f__Tenericutes|c__Mollicutes|o__MollicutesRF39	IBD_ynyes	-0.0165638789994903	111	37	1.79872134748181e-05	0.00725244447304667
25	IBD_yn	k__Bacteria|f__Tenericutes|c__Mollicutes|o__MollicutesRF39|f__unculturedbacterium	IBD_ynyes	-0.0161939411128495	111	37	3.0866221854956e-05	0.00888947189422733
26	IBD_yn	k__Bacteria|f__Tenericutes|c__Mollicutes|o__MollicutesRF39|f__unculturedbacterium|g__unculturedbacterium	IBD_ynyes	-0.0161939411128495	111	37	3.0866221854956e-05	0.00888947189422733
27	IBD_yn	k__Bacteria|f__Firmicutes|c__Clostridia|o__Clostridiales|f__Christensenellaceae	IBD_ynyes	-0.0748771234863388	111	99	3.57136563406775e-05	0.00899984139785072
28	IBD_yn	k__Bacteria|f__Firmicutes|c__Clostridia|o__Clostridiales|f__Ruminococcaceae|g__RuminococcaceaeUCG_010	IBD_ynyes	-0.0348144635197913	111	64	5.50519448768846e-05	0.0123316356524222
29	IBD_yn	k__Bacteria|f__Firmicutes|c__Clostridia|o__Clostridiales|f__Christensenellaceae|g__ChristensenellaceaeR_7group	IBD_ynyes	-0.0693813269723882	111	99	9.4389149633578e-05	0.0190288525661293
30	IBD_yn	k__Bacteria|f__Firmicutes|c__Clostridia|o__Clostridiales|f__Christensenellaceae|g__uncultured	IBD_ynyes	-0.0143597872168265	111	70	0.000120813575674412	0.0195128736030083
31	IBD_yn	k__Bacteria|f__Firmicutes|c__Clostridia|o__Clostridiales|f__Ruminococcaceae|g__RuminococcaceaeUCG_011	IBD_ynyes	-0.00709298718737784	111	42	0.000135565373287235	0.0195128736030083
32	IBD_yn	k__Bacteria|f__Firmicutes|c__Clostridia|o__Clostridiales|f__FamilyXIII|g__FamilyXIIIAD3011group	IBD_ynyes	-0.0267684000028797	111	99	0.000186881935700321	0.0211845175029284
33	IBD_yn	k__Bacteria|f__Firmicutes|c__Clostridia|o__Clostridiales|f__Lachnospiraceae|g__Sellimonas	IBD_ynyes	0.00554353648836506	111	37	0.000275349590810912	0.0284233927203456
34	IBD_yn	k__Bacteria|f__Firmicutes|c__Clostridia|o__Clostridiales|f__Ruminococcaceae|g__RuminococcaceaeUCG_002	IBD_ynyes	-0.111027531487077	111	106	0.000281978102384381	0.0284233927203456
35	IBD_yn	k__Bacteria|f__Firmicutes|c__Clostridia|o__Clostridiales|f__Ruminococcaceae|g__Hydrogenoanaerobacterium	IBD_ynyes	-0.00563923691666422	111	14	0.000315506807899128	0.0302886535583163
36	IBD_yn	k__Bacteria|f__Firmicutes|c__Clostridia|o__Clostridiales|f__Peptococcaceae|g__uncultured	IBD_ynyes	-0.0101092424411235	111	54	0.000611177643770385	0.0441496989484376
37	IBD_yn	k__Bacteria|f__Firmicutes|c__Clostridia|o__Clostridiales|f__Defluviitaleaceae|g__DefluviitaleaceaeUCG_011	IBD_ynyes	-0.0160471994017449	111	71	0.000627560693330305	0.0441496989484376
38	IBD_yn	k__Bacteria|f__Firmicutes|c__Clostridia|o__Clostridiales|f__Ruminococcaceae	IBD_ynyes	-0.14381355376351	111	111	0.000635089915428913	0.0441496989484376
39	IBD_yn	k__Bacteria|f__Firmicutes|c__Clostridia|o__Clostridiales|f__Defluviitaleaceae	IBD_ynyes	-0.0158108024362966	111	71	0.000752967895916862	0.0483113073628994
40	IBD_yn	k__Bacteria|f__Proteobacteria|c__Gammaproteobacteria|o__Betaproteobacteriales|f__Burkholderiaceae|g__Oxalobacter	IBD_ynyes	-0.00283337897876424	111	24	0.000789647301013414	0.0483113073628994
41	IBD_yn	k__Bacteria|f__Firmicutes|c__Clostridia|o__Clostridiales|f__Lachnospiraceae|g__Blautia	IBD_ynyes	0.0335547781188064	111	108	0.000853515450186024	0.0506084455169125
42	IBD_yn	k__Bacteria|f__Firmicutes|c__Clostridia|o__Clostridiales|f__Ruminococcaceae|g__RuminococcaceaeUCG_007	IBD_ynyes	-0.00580868096923733	111	36	0.000937127590002019	0.0539785491841163
43	IBD_yn	k__Bacteria|f__Firmicutes|c__Clostridia|o__Clostridiales|f__Ruminococcaceae|g__RuminococcaceaeUCG_005	IBD_ynyes	-0.052917645715197	111	98	0.000973028394682517	0.0544895901022209
44	IBD_yn	k__Bacteria|f__Firmicutes|c__Clostridia|o__Clostridiales|f__Lachnospiraceae|g__Coprococcus2	IBD_ynyes	-0.0401517444371869	111	59	0.00115686622554084	0.0630335759646037
45	IBD_yn	k__Bacteria|f__Firmicutes|c__Clostridia|o__Clostridiales|f__Lachnospiraceae	IBD_ynyes	0.12271806919006	111	111	0.00219340498227598	0.107851327908985
46	IBD_yn	k__Bacteria|f__Firmicutes|c__Clostridia|o__Clostridiales|f__Ruminococcaceae|g__uncultured	IBD_ynyes	-0.0350675515052751	111	107	0.00353228395839587	0.126257596522076
47	IBD_yn	k__Bacteria|f__Firmicutes|c__Clostridia|o__Clostridiales|f__Lachnospiraceae|g__Agathobacter	IBD_ynyes	0.0116138986838446	111	104	0.00378617990167305	0.128627374286774
48	IBD_yn	k__Bacteria|f__Firmicutes|c__Clostridia|o__Clostridiales|f__FamilyXIII	IBD_ynyes	-0.0321106528755175	111	102	0.00473405323272377	0.148593870749331
49	IBD_yn	k__Bacteria|f__Verrucomicrobia	IBD_ynyes	-0.00628440276250965	111	43	0.0048646802923888	0.148593870749331
50	IBD_yn	k__Bacteria|f__Verrucomicrobia|c__Verrucomicrobiae	IBD_ynyes	-0.00628440276250965	111	43	0.0048646802923888	0.148593870749331
51	IBD_yn	k__Bacteria|f__Verrucomicrobia|c__Verrucomicrobiae|o__Verrucomicrobiales	IBD_ynyes	-0.00628440276250965	111	43	0.0048646802923888	0.148593870749331
52	IBD_yn	k__Bacteria|f__Verrucomicrobia|c__Verrucomicrobiae|o__Verrucomicrobiales|f__Akkermansiaceae	IBD_ynyes	-0.00628440276250965	111	43	0.0048646802923888	0.148593870749331
53	IBD_yn	k__Bacteria|f__Verrucomicrobia|c__Verrucomicrobiae|o__Verrucomicrobiales|f__Akkermansiaceae|g__Akkermansia	IBD_ynyes	-0.00628440276250965	111	43	0.0048646802923888	0.148593870749331
54	IBD_yn	k__Bacteria|f__Firmicutes|c__Clostridia|o__Clostridiales|f__Lachnospiraceae|Other	IBD_ynyes	0.0790575106559659	111	111	0.00536013410464881	0.156609135579304
55	IBD_yn	k__Bacteria|f__Firmicutes|c__Clostridia|o__Clostridiales|f__Ruminococcaceae|g__RuminococcaceaeNK4A214group	IBD_ynyes	-0.0524557334781286	111	96	0.00568756019866219	0.159253035961505
56	IBD_yn	k__Bacteria|f__Firmicutes|c__Clostridia|o__Clostridiales|f__Lachnospiraceae|g___Eubacterium_ruminantiumgroup	IBD_ynyes	-0.00264543668800924	111	38	0.00621410149989965	0.168962516218273
57	IBD_yn	k__Bacteria|f__Actinobacteria|c__Coriobacteriia|o__Coriobacteriales|f__uncultured	IBD_ynyes	-0.00895813605387972	111	22	0.00708188899132946	0.176355729439243
58	IBD_yn	k__Bacteria|f__Actinobacteria|c__Coriobacteriia|o__Coriobacteriales|f__uncultured|g__unculturedbacterium	IBD_ynyes	-0.00895813605387972	111	22	0.00708188899132946	0.176355729439243
59	IBD_yn	k__Archaea|f__Euryarchaeota|c__Methanobacteria	IBD_ynyes	-0.00577141449960621	111	23	0.00839312754897546	0.196750524869006
60	IBD_yn	k__Archaea|f__Euryarchaeota|c__Methanobacteria|o__Methanobacteriales	IBD_ynyes	-0.00577141449960621	111	23	0.00839312754897546	0.196750524869006
61	IBD_yn	k__Archaea|f__Euryarchaeota|c__Methanobacteria|o__Methanobacteriales|f__Methanobacteriaceae	IBD_ynyes	-0.00577141449960621	111	23	0.00839312754897546	0.196750524869006
62	IBD_yn	k__Archaea|f__Euryarchaeota|c__Methanobacteria|o__Methanobacteriales|f__Methanobacteriaceae|g__Methanobrevibacter	IBD_ynyes	-0.00577141449960621	111	23	0.00839312754897546	0.196750524869006
63	IBD_yn	k__Bacteria|f__Firmicutes|c__Clostridia|o__Clostridiales|f__Ruminococcaceae|g__RuminococcaceaeUCG_014	IBD_ynyes	-0.0588853487928609	111	88	0.00939015252266363	0.210339416507665
64	IBD_yn	k__Bacteria|f__Firmicutes|c__Clostridia|o__Clostridiales|f__ClostridialesvadinBB60group	IBD_ynyes	-0.00730131585973754	111	65	0.0102731961142249	0.227590806222829
65	IBD_yn	k__Bacteria|f__Proteobacteria|c__Deltaproteobacteria	IBD_ynyes	-0.0156120796716613	111	43	0.0109814505200888	0.238049508048376
66	IBD_yn	k__Bacteria|f__Firmicutes|c__Clostridia|o__Clostridiales|f__ClostridialesvadinBB60group|g__unculturedbacterium	IBD_ynyes	-0.00717243423685266	111	65	0.0113702125137512	0.243854770507685
67	PPI	k__Bacteria|f__Firmicutes|c__Clostridia	PPIyes	-0.345457588313609	111	111	0.000442748279232042	0.0359658736260009
68	PPI	k__Bacteria|f__Firmicutes|c__Clostridia|o__Clostridiales	PPIyes	-0.345457588313609	111	111	0.000442748279232042	0.0359658736260009
69	PPI	k__Bacteria|f__Firmicutes|c__Bacilli|o__Lactobacillales	PPIyes	0.0496491659264014	111	106	0.000790810090761745	0.0483113073628994
70	PPI	k__Bacteria|f__Firmicutes|c__Bacilli|o__Lactobacillales|f__Streptococcaceae|g__Streptococcus	PPIyes	0.0350284142081793	111	104	0.00265731076289982	0.109329357102164
71	PPI	k__Bacteria|f__Firmicutes|c__Negativicutes|o__Selenomonadales|f__Veillonellaceae|g__Veillonella	PPIyes	0.00855610293587687	111	34	0.00382819566329685	0.128627374286774
72	PPI	k__Bacteria|f__Firmicutes|c__Bacilli|o__Lactobacillales|f__Streptococcaceae	PPIyes	0.0335553740989817	111	105	0.0051870008173116	0.153779318348532
73	PPI	k__Bacteria|f__Firmicutes|c__Negativicutes|o__Selenomonadales|f__Veillonellaceae	PPIyes	0.301619281203368	111	98	0.00628580789502505	0.168962516218273
74	PPI	k__Bacteria|f__Firmicutes|c__Negativicutes	PPIyes	0.298066043500543	111	101	0.00671123858560756	0.173459704981857
75	PPI	k__Bacteria|f__Firmicutes|c__Negativicutes|o__Selenomonadales	PPIyes	0.298066043500543	111	101	0.00671123858560756	0.173459704981857
76	PSC_yn	k__Bacteria|f__Proteobacteria|c__Alphaproteobacteria|o__Rhizobiales	PSC_ynyes	0.00300341431221	111	27	0.000344474085721407	0.0315663525824708
77	PSC_yn	k__Bacteria|f__Proteobacteria|c__Alphaproteobacteria|o__Sphingomonadales|f__Sphingomonadaceae	PSC_ynyes	0.00834463422382585	111	27	0.000446005377306559	0.0359658736260009
78	PSC_yn	k__Bacteria|f__Proteobacteria|c__Alphaproteobacteria	PSC_ynyes	0.00691415773925177	111	63	0.000718163309975804	0.0482605744303741
79	PSC_yn	k__Bacteria|f__Firmicutes|c__Clostridia|o__Clostridiales|f__Lachnospiraceae|g__Blautia	PSC_ynyes	-0.0348265511039101	111	108	0.00192479762010047	0.0970098000530639
80	PSC_yn	k__Bacteria|f__Firmicutes|c__Clostridia|o__Clostridiales|f__Ruminococcaceae|g__Faecalibacterium	PSC_ynyes	-0.00576495685546527	111	61	0.00230617018507966	0.109329357102164
81	PSC_yn	Unassigned|Other	PSC_ynyes	-0.0163811030360475	111	107	0.00251107587524124	0.109329357102164
82	PSC_yn	Unassigned|Other|Other	PSC_ynyes	-0.0163811030360475	111	107	0.00251107587524124	0.109329357102164
83	PSC_yn	Unassigned|Other|Other|Other	PSC_ynyes	-0.0163811030360475	111	107	0.00251107587524124	0.109329357102164
84	PSC_yn	Unassigned|Other|Other|Other|Other	PSC_ynyes	-0.0163811030360475	111	107	0.00251107587524124	0.109329357102164
85	PSC_yn	k__Bacteria|f__Firmicutes|c__Clostridia|o__Clostridiales|f__Ruminococcaceae|g__Ruminococcus2	PSC_ynyes	-0.0314403590277494	111	82	0.00297750237732437	0.117698917503646
86	PSC_yn	k__Bacteria|f__Firmicutes|c__Clostridia|o__Clostridiales|f__Lachnospiraceae|g__Lachnoclostridium	PSC_ynyes	-0.026037617057435	111	110	0.00662592094138947	0.173459704981857
87	PSC_yn	k__Bacteria|f__Firmicutes|c__Clostridia|o__Clostridiales|f__Ruminococcaceae|g__Ruminiclostridium5	PSC_ynyes	-0.00625390635897698	111	69	0.00892825717433798	0.205054546578033
88	PSC_yn	k__Bacteria|f__Firmicutes|c__Negativicutes|o__Selenomonadales|f__Veillonellaceae|g__Veillonella	PSC_ynyes	0.00323870163737603	111	34	0.00938190109229175	0.210339416507665
89	SPA	k__Bacteria|f__Firmicutes|c__Clostridia|o__Clostridiales|f__Lachnospiraceae|g__LachnospiraceaeFCS020group	SPAyes	0.0188577183753409	111	57	0.000164026261954506	0.0206673090062678
90	SPA	k__Bacteria|f__Firmicutes|c__Clostridia|o__Clostridiales|f__Lachnospiraceae|g___Eubacterium_ventriosumgroup	SPAyes	0.0853537571333947	111	94	0.000189147477704717	0.0211845175029284
91	SPA	k__Bacteria|f__Firmicutes|c__Clostridia|o__Clostridiales|f__Lachnospiraceae|g__Lachnospira	SPAyes	0.0471043154532208	111	87	0.00607257815424248	0.167702980259628
92	UDCA	k__Bacteria|f__Proteobacteria|c__Alphaproteobacteria|o__Sphingomonadales|f__Sphingomonadaceae	UDCAyes	-0.00627651719057609	111	27	0.00895079369983475	0.205054546578033
93	Vitamine_D3	k__Bacteria|f__Firmicutes|c__Clostridia|o__Clostridiales|f__Peptococcaceae|g__Peptococcus	Vitamine_D3yes	0.019972604687346	111	45	0.000466193729827112	0.0361479445896715
94	Vitamine_D3	k__Bacteria|f__Firmicutes|c__Clostridia|o__Clostridiales|f__Peptococcaceae	Vitamine_D3yes	0.0311936030089106	111	69	0.00263339758090643	0.109329357102164
