# Supplementary material
Source: HighWire-hosted journal article supplement (https://gut.bmj.com/content/69/1/92)
Supplement: inline-supplementary-material-7 [file inline-supplementary-material-7.xlsx]

## Sheet: Healthy Subjects
tab1	tab2	Dcor_coef	Dcor_pvalue	Dcor_AdjPval	spearm_sign
k__Fungi;p__Ascomycota;c__Sordariomycetes;o__Hypocreales;f__Cordycipitaceae	D_0__Bacteria;p__Proteobacteria;D_2__Gammaproteobacteria;D_3__Betaproteobacteriales;f__Burkholderiaceae	0.411591665735741	5.38458166943201e-14	1.46460621408551e-10	1
k__Fungi;p__Ascomycota;c__Saccharomycetes;o__Saccharomycetales;f__Incertae sedis	D_0__Bacteria;p__Actinobacteria;D_2__Coriobacteriia;D_3__Coriobacteriales;f__Eggerthellaceae;g__uncultured	0.366150122945056	2.99310576323819e-11	2.18435447507659e-08	1
k__Fungi;p__Ascomycota;c__Sordariomycetes;o__Hypocreales;f__Cordycipitaceae	D_0__Bacteria;p__Bacteroidetes;D_2__Bacteroidia;D_3__Bacteroidales;f__Rikenellaceae;g__Alistipes	0.365600121319461	3.21228599275969e-11	2.18435447507659e-08	1
k__Fungi;p__Ascomycota;c__Saccharomycetes;o__Saccharomycetales;f__Incertae sedis;g__Candida	D_0__Bacteria;p__Firmicutes;D_2__Clostridia;D_3__Clostridiales;f__Ruminococcaceae;g__Ruminiclostridium 9	0.366865486611499	2.72970535064587e-11	2.18435447507659e-08	-1
k__Fungi;p__Ascomycota;c__Sordariomycetes;o__Hypocreales;f__Cordycipitaceae	D_0__Bacteria;p__Proteobacteria;D_2__Gammaproteobacteria;D_3__Betaproteobacteriales;f__Burkholderiaceae;g__Parasutterella	0.353101784238246	1.54419810272088e-10	8.40043767880161e-08	1
k__Fungi;p__Ascomycota;c__Sordariomycetes;o__Hypocreales;f__Cordycipitaceae	D_0__Bacteria;p__Firmicutes;D_2__Clostridia;D_3__Clostridiales;f__Lachnospiraceae	0.342276961717606	5.69708502595745e-10	2.58267854510071e-07	-1
k__Fungi;p__Ascomycota;c__Saccharomycetes;o__Saccharomycetales;f__Incertae sedis	D_0__Bacteria;p__Firmicutes;D_2__Clostridia;D_3__Clostridiales;f__Lachnospiraceae;g__Fusicatenibacter	0.339935165017458	7.50715045683137e-10	2.91706417751162e-07	1
k__Fungi;p__Ascomycota;c__Sordariomycetes;o__Hypocreales;f__Nectriaceae	D_0__Bacteria;p__Firmicutes;D_2__Clostridia;D_3__Clostridiales;f__Ruminococcaceae	0.31425499166035	1.33450341888164e-08	4.03316588817562e-06	1
k__Fungi;p__Ascomycota;c__Sordariomycetes;o__Hypocreales;f__Nectriaceae;g__Fusarium	D_0__Bacteria;p__Firmicutes;D_2__Clostridia;D_3__Clostridiales;f__Ruminococcaceae	0.31425499166035	1.33450341888164e-08	4.03316588817562e-06	1
k__Fungi;p__Ascomycota;c__Saccharomycetes;o__Saccharomycetales;f__Incertae sedis;g__Candida	D_0__Bacteria;p__Firmicutes;D_2__Clostridia;D_3__Clostridiales;f__Ruminococcaceae;g__Oscillibacter	0.31294662695355	1.53432561100786e-08	4.17336566194138e-06	1
k__Fungi;p__Ascomycota;c__Sordariomycetes;o__Hypocreales;f__Cordycipitaceae	D_0__Bacteria;p__Firmicutes;D_2__Clostridia;D_3__Clostridiales;f__Lachnospiraceae;g__Blautia	0.311114329998633	1.86333135587802e-08	4.22355107332351e-06	-1
k__Fungi;p__Ascomycota;c__Saccharomycetes;o__Saccharomycetales;f__Saccharomycetaceae	D_0__Bacteria;p__Firmicutes;D_2__Clostridia;D_3__Clostridiales;f__Peptostreptococcaceae;Other	0.311261112450159	1.83464579084358e-08	4.22355107332351e-06	1
k__Fungi;p__Ascomycota;c__Sordariomycetes;o__Hypocreales;f__Nectriaceae	D_0__Bacteria;p__Firmicutes;D_2__Clostridia;D_3__Clostridiales;f__Ruminococcaceae;g__Ruminococcaceae UCG-010	0.30960517690343	2.18450649791535e-08	4.24418405309268e-06	1
k__Fungi;p__Ascomycota;c__Sordariomycetes;o__Hypocreales;f__Nectriaceae;g__Fusarium	D_0__Bacteria;p__Firmicutes;D_2__Clostridia;D_3__Clostridiales;f__Ruminococcaceae;g__Ruminococcaceae UCG-010	0.30960517690343	2.18450649791535e-08	4.24418405309268e-06	1
k__Fungi;p__Ascomycota;c__Saccharomycetes;o__Saccharomycetales;f__Incertae sedis	D_0__Bacteria;p__Actinobacteria;D_2__Coriobacteriia;D_3__Coriobacteriales;f__Eggerthellaceae	0.29755548962748	7.53389057805975e-08	1.36614549148817e-05	1
k__Fungi;p__Ascomycota;c__Sordariomycetes;o__Hypocreales;f__Cordycipitaceae	D_0__Bacteria;p__Actinobacteria;D_2__Actinobacteria;D_3__Bifidobacteriales;f__Bifidobacteriaceae	0.29516868833525	9.56421266629093e-08	1.53224040388977e-05	-1
k__Fungi;p__Ascomycota;c__Sordariomycetes;o__Hypocreales;f__Cordycipitaceae	D_0__Bacteria;p__Actinobacteria;D_2__Actinobacteria;D_3__Bifidobacteriales;f__Bifidobacteriaceae;g__Bifidobacterium	0.295155784486659	9.57650252431108e-08	1.53224040388977e-05	-1
k__Fungi;p__Ascomycota;c__Sordariomycetes;o__Hypocreales;f__Cordycipitaceae	D_0__Bacteria;p__Firmicutes;D_2__Clostridia;D_3__Clostridiales;f__Family XIII	0.294472453213711	1.02494671416764e-07	1.54880836807555e-05	-1
k__Fungi;p__Ascomycota;c__Saccharomycetes;o__Saccharomycetales;f__Saccharomycetaceae;g__Saccharomyces	D_0__Bacteria;p__Firmicutes;D_2__Clostridia;D_3__Clostridiales;f__Peptostreptococcaceae;Other	0.291582858625967	1.36325084887368e-07	1.95160121522968e-05	1
k__Fungi;p__Ascomycota;c__Sordariomycetes;o__Hypocreales;f__Cordycipitaceae	D_0__Bacteria;p__Firmicutes;D_2__Clostridia;D_3__Clostridiales;f__Lachnospiraceae;g__Coprococcus 1	0.281021150395586	3.76520133404945e-07	5.12067381430725e-05	-1
k__Fungi;p__Ascomycota;c__Sordariomycetes;o__Hypocreales;f__Cordycipitaceae	D_0__Bacteria;p__Firmicutes;D_2__Clostridia;D_3__Clostridiales;f__Lachnospiraceae;g__Marvinbryantia	0.280502677012019	3.95352205306843e-07	5.12075237349815e-05	-1
k__Fungi;p__Ascomycota;c__Dothideomycetes;o__Capnodiales;f__Davidiellaceae	D_0__Bacteria;p__Firmicutes;D_2__Bacilli;D_3__Lactobacillales;f__Streptococcaceae;g__Streptococcus	0.277864986909578	5.06001406330725e-07	5.98095232646756e-05	1
k__Fungi;p__Ascomycota;c__Dothideomycetes;o__Capnodiales;f__Davidiellaceae;g__Davidiella	D_0__Bacteria;p__Firmicutes;D_2__Bacilli;D_3__Lactobacillales;f__Streptococcaceae;g__Streptococcus	0.277864986909578	5.06001406330725e-07	5.98095232646756e-05	1
k__Fungi;p__Ascomycota;c__Eurotiomycetes;o__Eurotiales;f__Trichocomaceae	D_0__Bacteria;p__Firmicutes;D_2__Clostridia;D_3__Clostridiales;f__Ruminococcaceae;g__Subdoligranulum	0.276973005311342	5.49719882947386e-07	5.98095232646756e-05	1
k__Fungi;p__Ascomycota;c__Eurotiomycetes;o__Eurotiales;f__Trichocomaceae;g__Penicillium	D_0__Bacteria;p__Firmicutes;D_2__Clostridia;D_3__Clostridiales;f__Ruminococcaceae;g__Subdoligranulum	0.276973005311342	5.49719882947386e-07	5.98095232646756e-05	1
k__Fungi;p__Ascomycota;c__Dothideomycetes;o__Capnodiales;f__Davidiellaceae	D_0__Bacteria;p__Firmicutes;D_2__Bacilli;D_3__Lactobacillales;f__Streptococcaceae	0.266822284265633	1.38308570063472e-06	0.000134356896633087	1
k__Fungi;p__Ascomycota;c__Dothideomycetes;o__Capnodiales;f__Davidiellaceae;g__Davidiella	D_0__Bacteria;p__Firmicutes;D_2__Bacilli;D_3__Lactobacillales;f__Streptococcaceae	0.266822284265633	1.38308570063472e-06	0.000134356896633087	1
k__Fungi;p__Ascomycota;c__Sordariomycetes;o__Hypocreales;f__Cordycipitaceae	D_0__Bacteria;p__Firmicutes;D_2__Clostridia;D_3__Clostridiales;f__Lachnospiraceae;g__[Eubacterium] hallii group	0.267354224137099	1.31902132927131e-06	0.000134356896633087	-1
k__Fungi;p__Ascomycota;c__Sordariomycetes;o__Hypocreales;f__Cordycipitaceae	D_0__Bacteria;p__Firmicutes;D_2__Clostridia;D_3__Clostridiales;f__Lachnospiraceae;g__Dorea	0.257741376160232	3.05988028692639e-06	0.000286995668291027	-1
k__Fungi;p__Ascomycota;c__Sordariomycetes;o__Hypocreales;f__Cordycipitaceae	D_0__Bacteria;p__Actinobacteria;D_2__Actinobacteria;D_3__Actinomycetales;f__Actinomycetaceae	0.252563657720737	4.74965329111399e-06	0.000425096026722299	-1
k__Fungi;p__Ascomycota;c__Sordariomycetes;o__Hypocreales;f__Cordycipitaceae	D_0__Bacteria;p__Bacteroidetes;D_2__Bacteroidia;D_3__Bacteroidales;f__Rikenellaceae	0.252327345875605	4.84484442220268e-06	0.000425096026722299	1
k__Fungi;p__Ascomycota;c__Sordariomycetes;o__Hypocreales;f__Cordycipitaceae	D_0__Bacteria;p__Firmicutes;D_2__Clostridia;D_3__Clostridiales;f__Lachnospiraceae;g__Agathobacter	0.240658919968583	1.25991972608208e-05	0.00107093176716977	-1
k__Fungi;p__Ascomycota;c__Saccharomycetes;o__Saccharomycetales;f__Incertae sedis;g__Candida	D_0__Bacteria;p__Firmicutes;D_2__Clostridia;D_3__Clostridiales;f__Ruminococcaceae;g__Flavonifractor	0.237840125667098	1.57601982258004e-05	0.00129902239921749	1
k__Fungi;p__Ascomycota;c__Sordariomycetes;o__Hypocreales;f__Nectriaceae	D_0__Bacteria;p__Firmicutes;D_2__Clostridia;D_3__Clostridiales;f__Ruminococcaceae;g__Ruminococcaceae UCG-002	0.234501995684173	2.04726157482238e-05	0.00159101470957625	1
k__Fungi;p__Ascomycota;c__Sordariomycetes;o__Hypocreales;f__Nectriaceae;g__Fusarium	D_0__Bacteria;p__Firmicutes;D_2__Clostridia;D_3__Clostridiales;f__Ruminococcaceae;g__Ruminococcaceae UCG-002	0.234501995684173	2.04726157482238e-05	0.00159101470957625	1
k__Fungi;p__Ascomycota;c__Saccharomycetes;o__Saccharomycetales;f__Incertae sedis;g__Candida	D_0__Bacteria;p__Firmicutes;D_2__Clostridia;D_3__Clostridiales;f__Eubacteriaceae;g__Anaerofustis	0.230936445946743	2.6959789139136e-05	0.00203696184606805	1
k__Fungi;p__Ascomycota;c__Sordariomycetes;o__Hypocreales;f__Cordycipitaceae	D_0__Bacteria;p__Firmicutes;D_2__Clostridia;D_3__Clostridiales;f__Lachnospiraceae;g__Lachnospiraceae UCG-008	0.229879224354045	2.92283850695796e-05	0.00214868128079072	-1
k__Fungi;p__Ascomycota;c__Sordariomycetes;o__Hypocreales;f__Nectriaceae	D_0__Bacteria;p__Firmicutes;D_2__Clostridia;D_3__Clostridiales;f__Lachnospiraceae;g__Dorea	0.228637014721602	3.21236265012903e-05	0.0022404170277823	-1
k__Fungi;p__Ascomycota;c__Sordariomycetes;o__Hypocreales;f__Nectriaceae;g__Fusarium	D_0__Bacteria;p__Firmicutes;D_2__Clostridia;D_3__Clostridiales;f__Lachnospiraceae;g__Dorea	0.228637014721602	3.21236265012903e-05	0.0022404170277823	-1
k__Fungi;p__Ascomycota;c__Sordariomycetes;o__Hypocreales;f__Cordycipitaceae	D_0__Bacteria;p__Firmicutes;D_2__Clostridia;D_3__Clostridiales;f__Peptostreptococcaceae	0.224340212983865	4.43592093841705e-05	0.00288864691927957	-1
k__Fungi;p__Ascomycota;c__Sordariomycetes;o__Hypocreales;f__Nectriaceae	D_0__Bacteria;p__Firmicutes;D_2__Clostridia;D_3__Clostridiales;f__Ruminococcaceae;g__Candidatus Soleaferrea	0.224266193786711	4.46041068418168e-05	0.00288864691927957	-1
k__Fungi;p__Ascomycota;c__Sordariomycetes;o__Hypocreales;f__Nectriaceae;g__Fusarium	D_0__Bacteria;p__Firmicutes;D_2__Clostridia;D_3__Clostridiales;f__Ruminococcaceae;g__Candidatus Soleaferrea	0.224266193786711	4.46041068418168e-05	0.00288864691927957	-1
k__Fungi;p__Ascomycota;c__Sordariomycetes;o__Hypocreales;f__Cordycipitaceae	D_0__Bacteria;p__Firmicutes;D_2__Clostridia;D_3__Clostridiales;f__Ruminococcaceae;g__Ruminococcaceae UCG-005	0.223709141301282	4.64883365507429e-05	0.00294065756786095	1
k__Fungi;p__Ascomycota;c__Sordariomycetes;o__Hypocreales;f__Nectriaceae	D_0__Bacteria;p__Firmicutes;D_2__Clostridia;D_3__Clostridiales;f__Lachnospiraceae;g__Shuttleworthia	0.221936413525289	5.29944340608157e-05	0.00313358392707432	-1
k__Fungi;p__Ascomycota;c__Sordariomycetes;o__Hypocreales;f__Nectriaceae;g__Fusarium	D_0__Bacteria;p__Firmicutes;D_2__Clostridia;D_3__Clostridiales;f__Lachnospiraceae;g__Shuttleworthia	0.221936413525289	5.29944340608157e-05	0.00313358392707432	-1
k__Fungi;p__Ascomycota;c__Sordariomycetes;o__Hypocreales;f__Cordycipitaceae	D_0__Bacteria;p__Firmicutes;D_2__Clostridia;D_3__Clostridiales;f__Peptostreptococcaceae;g__uncultured	0.222531255452368	5.07215386582605e-05	0.00313358392707432	-1
k__Fungi;p__Ascomycota;c__Sordariomycetes;o__Hypocreales;f__Cordycipitaceae	D_0__Bacteria;p__Firmicutes;D_2__Clostridia;D_3__Clostridiales;f__Lachnospiraceae;g__Lachnoclostridium	0.218945772094217	6.59440280488255e-05	0.00375404460345563	-1
k__Fungi;p__Ascomycota;c__Sordariomycetes;o__Hypocreales;f__Cordycipitaceae	D_0__Bacteria;p__Firmicutes;D_2__Clostridia;D_3__Clostridiales;f__Lachnospiraceae;g__Lachnospiraceae UCG-006	0.218882455354504	6.62478459433347e-05	0.00375404460345563	-1
k__Fungi;p__Ascomycota;c__Sordariomycetes;o__Hypocreales;f__Cordycipitaceae	D_0__Bacteria;p__Firmicutes;D_2__Clostridia;D_3__Clostridiales;f__Lachnospiraceae;g__Anaerostipes	0.21444631704937	9.11198757307385e-05	0.0050580828977063	-1
k__Fungi;p__Ascomycota;c__Sordariomycetes;o__Hypocreales;f__Cordycipitaceae	D_0__Bacteria;p__Actinobacteria;D_2__Actinobacteria;D_3__Actinomycetales;f__Actinomycetaceae;g__Actinomyces	0.212170850601981	0.000107038415438465	0.00570871549005147	-1
k__Fungi;p__Ascomycota;c__Saccharomycetes;o__Saccharomycetales;f__Incertae sedis	D_0__Bacteria;p__Firmicutes;D_2__Clostridia;D_3__Clostridiales;f__Lachnospiraceae;g__Lachnospiraceae UCG-001	0.212210913253535	0.000106736967705245	0.00570871549005147	1
k__Fungi;p__Ascomycota;c__Saccharomycetes;o__Saccharomycetales;f__Saccharomycetaceae	D_0__Bacteria;p__Firmicutes;D_2__Clostridia;D_3__Clostridiales;f__Ruminococcaceae;g__Ruminiclostridium 6	0.206335754691538	0.000160515267316419	0.00839618321347422	1
k__Fungi;p__Ascomycota;c__Sordariomycetes;o__Hypocreales;f__Cordycipitaceae	D_0__Bacteria;p__Firmicutes;D_2__Clostridia;D_3__Clostridiales;f__Lachnospiraceae;g__Coprococcus 3	0.205500329691817	0.000169949578930573	0.00872194065455015	-1
k__Fungi;p__Ascomycota;c__Saccharomycetes;o__Saccharomycetales;f__Saccharomycetaceae	D_0__Bacteria;p__Firmicutes;D_2__Clostridia;D_3__Clostridiales;f__Lachnospiraceae;g__Lachnospiraceae NC2004 group	0.203889676497482	0.000189611647877563	0.00955080893012912	1
k__Fungi;p__Ascomycota;c__Dothideomycetes;o__Pleosporales;f__Pleosporaceae	D_0__Bacteria;p__Firmicutes;D_2__Negativicutes;D_3__Selenomonadales;f__Veillonellaceae	0.201430493026589	0.000223748533830781	0.0108677859289236	1
k__Fungi;p__Ascomycota;c__Dothideomycetes;o__Pleosporales;f__Pleosporaceae;g__Alternaria	D_0__Bacteria;p__Firmicutes;D_2__Negativicutes;D_3__Selenomonadales;f__Veillonellaceae	0.201430493026589	0.000223748533830781	0.0108677859289236	1
k__Fungi;p__Ascomycota;c__Saccharomycetes;o__Saccharomycetales;f__Saccharomycetaceae	D_0__Bacteria;p__Actinobacteria;D_2__Coriobacteriia;D_3__Coriobacteriales;f__Eggerthellaceae	0.199913181301311	0.00024757124849506	0.011610237860458	-1
k__Fungi;p__Ascomycota;c__Sordariomycetes;o__Hypocreales;f__Cordycipitaceae	D_0__Bacteria;p__Firmicutes;D_2__Clostridia;D_3__Clostridiales;f__Ruminococcaceae;g__Anaerotruncus	0.200137756344347	0.00024390283007536	0.011610237860458	1
k__Fungi;p__Ascomycota;c__Sordariomycetes;o__Hypocreales;f__Cordycipitaceae	D_0__Bacteria;p__Firmicutes;D_2__Clostridia;D_3__Clostridiales;f__Lachnospiraceae;g__[Ruminococcus] gauvreauii group	0.199489654069154	0.00025462920408903	0.0117388378834265	-1
k__Fungi;p__Ascomycota;c__Saccharomycetes;o__Saccharomycetales;f__Saccharomycetaceae;g__Saccharomyces	D_0__Bacteria;p__Actinobacteria;D_2__Coriobacteriia;D_3__Coriobacteriales;f__Eggerthellaceae	0.19585184652326	0.000323404315788256	0.0146609956490676	-1
k__Fungi;p__Ascomycota;c__Sordariomycetes;o__Hypocreales;f__Nectriaceae	D_0__Bacteria;p__Firmicutes;D_2__Clostridia;D_3__Clostridiales;f__Lachnospiraceae;g__[Eubacterium] hallii group	0.194425475482806	0.000354782838676071	0.0155646664709502	-1
k__Fungi;p__Ascomycota;c__Sordariomycetes;o__Hypocreales;f__Nectriaceae;g__Fusarium	D_0__Bacteria;p__Firmicutes;D_2__Clostridia;D_3__Clostridiales;f__Lachnospiraceae;g__[Eubacterium] hallii group	0.194425475482806	0.000354782838676071	0.0155646664709502	-1
k__Fungi;p__Ascomycota;c__Sordariomycetes;o__Hypocreales;f__Nectriaceae	D_0__Bacteria;p__Firmicutes;D_2__Negativicutes;D_3__Selenomonadales;f__Acidaminococcaceae	0.190129800439566	0.000467084698311249	0.0192495512031302	1
k__Fungi;p__Ascomycota;c__Sordariomycetes;o__Hypocreales;f__Nectriaceae;g__Fusarium	D_0__Bacteria;p__Firmicutes;D_2__Negativicutes;D_3__Selenomonadales;f__Acidaminococcaceae	0.190129800439566	0.000467084698311249	0.0192495512031302	1
k__Fungi;p__Ascomycota;c__Sordariomycetes;o__Hypocreales;f__Nectriaceae	D_0__Bacteria;p__Firmicutes;D_2__Negativicutes;D_3__Selenomonadales;f__Acidaminococcaceae;g__Phascolarctobacterium	0.190129800439566	0.000467084698311249	0.0192495512031302	1
k__Fungi;p__Ascomycota;c__Sordariomycetes;o__Hypocreales;f__Nectriaceae;g__Fusarium	D_0__Bacteria;p__Firmicutes;D_2__Negativicutes;D_3__Selenomonadales;f__Acidaminococcaceae;g__Phascolarctobacterium	0.190129800439566	0.000467084698311249	0.0192495512031302	1
k__Fungi;p__Ascomycota;c__Saccharomycetes;o__Saccharomycetales;f__Incertae sedis;g__Debaryomyces	D_0__Bacteria;p__Actinobacteria;D_2__Actinobacteria;D_3__Bifidobacteriales;f__Bifidobacteriaceae;g__Bifidobacterium	0.182004337362095	0.000773473544401382	0.0300549720110251	1
k__Fungi;p__Ascomycota;c__Saccharomycetes;o__Saccharomycetales;f__Incertae sedis	D_0__Bacteria;p__Firmicutes;D_2__Clostridia;D_3__Clostridiales;f__Lachnospiraceae;g__Lachnospiraceae FCS020 group	0.182443171755855	0.00075308333150903	0.0300549720110251	1
k__Fungi;p__Ascomycota;c__Saccharomycetes;o__Saccharomycetales;f__Saccharomycetaceae;g__Saccharomyces	D_0__Bacteria;p__Firmicutes;D_2__Clostridia;D_3__Clostridiales;f__Lachnospiraceae;g__Lachnospiraceae NC2004 group	0.182205300454344	0.000764073920110464	0.0300549720110251	1
k__Fungi;p__Ascomycota;c__Sordariomycetes;o__Hypocreales;f__Cordycipitaceae	D_0__Bacteria;p__Firmicutes;D_2__Clostridia;D_3__Clostridiales;f__Lachnospiraceae;Other	0.182592675564603	0.000746250023058614	0.0300549720110251	-1
k__Fungi;p__Ascomycota;c__Saccharomycetes;o__Saccharomycetales;f__Incertae sedis;g__Debaryomyces	D_0__Bacteria;p__Actinobacteria;D_2__Actinobacteria;D_3__Bifidobacteriales;f__Bifidobacteriaceae	0.181494350667903	0.000797804662957313	0.0305637842710407	1
k__Fungi;p__Ascomycota;c__Saccharomycetes;o__Saccharomycetales;f__Incertae sedis	D_0__Bacteria;p__Firmicutes;D_2__Clostridia;D_3__Clostridiales;f__Ruminococcaceae;g__Ruminococcaceae UCG-005	0.180053439615779	0.00087038709864351	0.0328812903931993	-1
k__Fungi;p__Ascomycota;c__Sordariomycetes;o__Hypocreales;f__Nectriaceae	D_0__Bacteria;p__Actinobacteria;D_2__Actinobacteria;D_3__Bifidobacteriales;f__Bifidobacteriaceae	0.175953232721963	0.00111121893244426	0.0399342867709159	-1
k__Fungi;p__Ascomycota;c__Sordariomycetes;o__Hypocreales;f__Nectriaceae;g__Fusarium	D_0__Bacteria;p__Actinobacteria;D_2__Actinobacteria;D_3__Bifidobacteriales;f__Bifidobacteriaceae	0.175953232721963	0.00111121893244426	0.0399342867709159	-1
k__Fungi;p__Ascomycota;c__Sordariomycetes;o__Hypocreales;f__Nectriaceae	D_0__Bacteria;p__Actinobacteria;D_2__Actinobacteria;D_3__Bifidobacteriales;f__Bifidobacteriaceae;g__Bifidobacterium	0.17588325971467	0.00111581095389324	0.0399342867709159	-1
k__Fungi;p__Ascomycota;c__Sordariomycetes;o__Hypocreales;f__Nectriaceae;g__Fusarium	D_0__Bacteria;p__Actinobacteria;D_2__Actinobacteria;D_3__Bifidobacteriales;f__Bifidobacteriaceae;g__Bifidobacterium	0.17588325971467	0.00111581095389324	0.0399342867709159	-1
k__Fungi;p__Ascomycota;c__Saccharomycetes;o__Saccharomycetales;f__Incertae sedis	D_0__Bacteria;p__Firmicutes;D_2__Clostridia;D_3__Clostridiales;f__Ruminococcaceae;g__Ruminococcaceae UCG-007	0.172721908734025	0.0013422332497095	0.047413953755972	-1
k__Fungi;p__Ascomycota;c__Saccharomycetes;o__Saccharomycetales;f__Saccharomycetaceae;g__Saccharomyces	D_0__Bacteria;p__Firmicutes;D_2__Clostridia;D_3__Clostridiales;f__Ruminococcaceae;g__Ruminiclostridium 6	0.172498124584605	0.00135974527870686	0.0474167584369571	1
k__Fungi;p__Ascomycota;c__Sordariomycetes;o__Hypocreales;f__Cordycipitaceae	D_0__Bacteria;p__Firmicutes;D_2__Clostridia;D_3__Clostridiales;f__Lachnospiraceae;g__Lachnospiraceae UCG-001	0.169825975958746	0.00158550382861533	0.0545894989092873	-1
k__Fungi;p__Ascomycota;c__Dothideomycetes;o__Pleosporales;f__Pleosporaceae	D_0__Bacteria;p__Firmicutes;D_2__Negativicutes;D_3__Selenomonadales;f__Veillonellaceae;g__Dialister	0.169234447317606	0.00163986219245893	0.0550669773270159	1
k__Fungi;p__Ascomycota;c__Dothideomycetes;o__Pleosporales;f__Pleosporaceae;g__Alternaria	D_0__Bacteria;p__Firmicutes;D_2__Negativicutes;D_3__Selenomonadales;f__Veillonellaceae;g__Dialister	0.169234447317606	0.00163986219245893	0.0550669773270159	1
k__Fungi;p__Ascomycota;c__Saccharomycetes;o__Saccharomycetales;f__Incertae sedis	D_0__Bacteria;p__Firmicutes;D_2__Clostridia;D_3__Clostridiales;f__Lachnospiraceae	0.168727827150714	0.00168775476187333	0.055984060393847	1
k__Fungi;p__Ascomycota;c__Sordariomycetes;o__Hypocreales;f__Cordycipitaceae	D_0__Bacteria;p__Firmicutes;D_2__Clostridia;D_3__Clostridiales;f__Lachnospiraceae;g__[Eubacterium] ventriosum group	0.168164983305593	0.00174244543397406	0.0571018262699933	-1
k__Fungi;p__Ascomycota;c__Sordariomycetes;o__Hypocreales;f__Nectriaceae	D_0__Bacteria;p__Firmicutes;D_2__Clostridia;D_3__Clostridiales;f__Lachnospiraceae;g__Blautia	0.167034017346653	0.00185721815430717	0.0594309809378295	-1
k__Fungi;p__Ascomycota;c__Sordariomycetes;o__Hypocreales;f__Nectriaceae;g__Fusarium	D_0__Bacteria;p__Firmicutes;D_2__Clostridia;D_3__Clostridiales;f__Lachnospiraceae;g__Blautia	0.167034017346653	0.00185721815430717	0.0594309809378295	-1
k__Fungi;p__Ascomycota;c__Sordariomycetes;o__Hypocreales;f__Cordycipitaceae	D_0__Bacteria;p__Proteobacteria;D_2__Gammaproteobacteria;D_3__Betaproteobacteriales;f__Burkholderiaceae;g__Oxalobacter	0.16669082202704	0.00189337444962168	0.0598834709647786	1
k__Fungi;p__Ascomycota;c__Saccharomycetes;o__Saccharomycetales;f__Incertae sedis;g__Candida	D_0__Bacteria;p__Firmicutes;D_2__Clostridia;D_3__Clostridiales;f__Eubacteriaceae	0.163472996835048	0.00226463397420795	0.0708023495384555	1
k__Fungi;p__Ascomycota;c__Saccharomycetes;o__Saccharomycetales;f__Incertae sedis	D_0__Bacteria;p__Firmicutes;D_2__Clostridia;D_3__Clostridiales;f__Ruminococcaceae;g__Butyricicoccus	0.161238191690251	0.00255981788074733	0.0791216435867356	1
k__Fungi;p__Ascomycota;c__Sordariomycetes;o__Hypocreales;f__Cordycipitaceae	D_0__Bacteria;p__Firmicutes;D_2__Bacilli;D_3__Lactobacillales;f__Streptococcaceae	0.156934418605245	0.00322742911528495	0.0976111508964834	-1
k__Fungi;p__Ascomycota;c__Saccharomycetes;o__Saccharomycetales;f__Saccharomycetaceae	D_0__Bacteria;p__Firmicutes;D_2__Clostridia;D_3__Clostridiales;f__Lachnospiraceae;g__Lachnospiraceae NK4A136 group	0.156920728856473	0.00322978072819247	0.0976111508964834	1
k__Fungi;p__Ascomycota;c__Saccharomycetes;o__Saccharomycetales;f__Saccharomycetaceae	D_0__Bacteria;p__Firmicutes;D_2__Clostridia;D_3__Clostridiales;f__Family XIII;Other	0.154725104081844	0.00362739163615378	0.108423134619102	1
k__Fungi;p__Ascomycota;c__Saccharomycetes;o__Saccharomycetales;f__Saccharomycetaceae	D_0__Bacteria;p__Firmicutes;D_2__Clostridia;D_3__Clostridiales;f__Lachnospiraceae;g__[Eubacterium] ruminantium group	0.154444013013142	0.00368133026198381	0.108839329484739	1
k__Fungi;p__Ascomycota;c__Sordariomycetes;o__Hypocreales;f__Nectriaceae	D_0__Bacteria;p__Actinobacteria;D_2__Coriobacteriia;D_3__Coriobacteriales;f__Atopobiaceae;g__Atopobium	0.153847214789433	0.00379822976156841	0.109906222887937	-1
k__Fungi;p__Ascomycota;c__Sordariomycetes;o__Hypocreales;f__Nectriaceae;g__Fusarium	D_0__Bacteria;p__Actinobacteria;D_2__Coriobacteriia;D_3__Coriobacteriales;f__Atopobiaceae;g__Atopobium	0.153847214789433	0.00379822976156841	0.109906222887937	-1
k__Fungi;p__Ascomycota;c__Sordariomycetes;o__Hypocreales;f__Nectriaceae	D_0__Bacteria;p__Firmicutes;D_2__Clostridia;D_3__Clostridiales;f__Lachnospiraceae	0.151664959739309	0.00425437918714566	0.120540743635794	-1
k__Fungi;p__Ascomycota;c__Sordariomycetes;o__Hypocreales;f__Nectriaceae;g__Fusarium	D_0__Bacteria;p__Firmicutes;D_2__Clostridia;D_3__Clostridiales;f__Lachnospiraceae	0.151664959739309	0.00425437918714566	0.120540743635794	-1
k__Fungi;p__Ascomycota;c__Dothideomycetes;o__Pleosporales;f__Pleosporaceae	D_0__Bacteria;p__Proteobacteria;D_2__Gammaproteobacteria;D_3__Pasteurellales;f__Pasteurellaceae	0.150999994883633	0.0044027474093814	0.122198703607321	1
k__Fungi;p__Ascomycota;c__Dothideomycetes;o__Pleosporales;f__Pleosporaceae;g__Alternaria	D_0__Bacteria;p__Proteobacteria;D_2__Gammaproteobacteria;D_3__Pasteurellales;f__Pasteurellaceae	0.150999994883633	0.0044027474093814	0.122198703607321	1
k__Fungi;p__Ascomycota;c__Dothideomycetes;o__Pleosporales;f__Pleosporaceae	D_0__Bacteria;p__Proteobacteria;D_2__Gammaproteobacteria;D_3__Pasteurellales;f__Pasteurellaceae;g__Haemophilus	0.149933050275697	0.00465043002005583	0.126491696545519	1
k__Fungi;p__Ascomycota;c__Dothideomycetes;o__Pleosporales;f__Pleosporaceae;g__Alternaria	D_0__Bacteria;p__Proteobacteria;D_2__Gammaproteobacteria;D_3__Pasteurellales;f__Pasteurellaceae;g__Haemophilus	0.149933050275697	0.00465043002005583	0.126491696545519	1
k__Fungi;p__Ascomycota;c__Saccharomycetes;o__Saccharomycetales;f__Incertae sedis	D_0__Bacteria;p__Firmicutes;D_2__Clostridia;D_3__Clostridiales;f__Lachnospiraceae;Other	0.149693481416886	0.00470771603672038	0.126782055642371	1
k__Fungi;p__Ascomycota;c__Saccharomycetes;o__Saccharomycetales;f__Saccharomycetaceae	D_0__Bacteria;p__Actinobacteria;D_2__Coriobacteriia;D_3__Coriobacteriales;f__Atopobiaceae	0.14833983117482	0.00504332236394744	0.1300814826748	1
k__Fungi;p__Ascomycota;c__Sordariomycetes;o__Hypocreales;f__Cordycipitaceae	D_0__Bacteria;p__Actinobacteria;D_2__Coriobacteriia;D_3__Coriobacteriales;f__Coriobacteriaceae	0.148052702718476	0.00511717597286898	0.1300814826748	-1
k__Fungi;p__Ascomycota;c__Sordariomycetes;o__Hypocreales;f__Cordycipitaceae	D_0__Bacteria;p__Actinobacteria;D_2__Coriobacteriia;D_3__Coriobacteriales;f__Coriobacteriaceae;g__Collinsella	0.148052702718476	0.00511717597286898	0.1300814826748	-1
k__Fungi;p__Ascomycota;c__Eurotiomycetes;o__Eurotiales;f__Trichocomaceae	D_0__Bacteria;p__Firmicutes;D_2__Clostridia;D_3__Clostridiales;f__Lachnospiraceae;g__Lachnospiraceae FCS020 group	0.148636318062256	0.00496805420273194	0.1300814826748	1
k__Fungi;p__Ascomycota;c__Eurotiomycetes;o__Eurotiales;f__Trichocomaceae;g__Penicillium	D_0__Bacteria;p__Firmicutes;D_2__Clostridia;D_3__Clostridiales;f__Lachnospiraceae;g__Lachnospiraceae FCS020 group	0.148636318062256	0.00496805420273194	0.1300814826748	1
k__Fungi;p__Ascomycota;c__Saccharomycetes;o__Saccharomycetales;f__Incertae sedis	D_0__Bacteria;p__Firmicutes;D_2__Clostridia;D_3__Clostridiales;f__Peptostreptococcaceae;Other	0.148214508443762	0.00507544025099804	0.1300814826748	-1
k__Fungi;p__Ascomycota;c__Sordariomycetes;o__Hypocreales;f__Nectriaceae	D_0__Bacteria;p__Actinobacteria;D_2__Coriobacteriia;D_3__Coriobacteriales;f__Atopobiaceae	0.145354698753826	0.00585929488920311	0.142150219426145	-1
k__Fungi;p__Ascomycota;c__Sordariomycetes;o__Hypocreales;f__Nectriaceae;g__Fusarium	D_0__Bacteria;p__Actinobacteria;D_2__Coriobacteriia;D_3__Coriobacteriales;f__Atopobiaceae	0.145354698753826	0.00585929488920311	0.142150219426145	-1
k__Fungi;p__Ascomycota;c__Sordariomycetes;o__Hypocreales;f__Nectriaceae	D_0__Bacteria;p__Firmicutes;D_2__Clostridia;D_3__Clostridiales;f__Lachnospiraceae;g__Anaerostipes	0.144843910761804	0.00601002765956127	0.142150219426145	-1
k__Fungi;p__Ascomycota;c__Sordariomycetes;o__Hypocreales;f__Nectriaceae;g__Fusarium	D_0__Bacteria;p__Firmicutes;D_2__Clostridia;D_3__Clostridiales;f__Lachnospiraceae;g__Anaerostipes	0.144843910761804	0.00601002765956127	0.142150219426145	-1
k__Fungi;p__Basidiomycota;c__Tremellomycetes;o__Filobasidiales;f__Filobasidiaceae	D_0__Bacteria;p__Firmicutes;D_2__Clostridia;D_3__Clostridiales;f__Ruminococcaceae;g__[Eubacterium] coprostanoligenes group	0.145155674396819	0.00591762529239059	0.142150219426145	-1
k__Fungi;p__Basidiomycota;c__Tremellomycetes;o__Filobasidiales;f__Filobasidiaceae;g__Filobasidium	D_0__Bacteria;p__Firmicutes;D_2__Clostridia;D_3__Clostridiales;f__Ruminococcaceae;g__[Eubacterium] coprostanoligenes group	0.145155674396819	0.00591762529239059	0.142150219426145	-1
k__Fungi;p__Ascomycota;c__Sordariomycetes;o__Hypocreales;f__Nectriaceae	D_0__Bacteria;p__Proteobacteria;D_2__Gammaproteobacteria;D_3__Betaproteobacteriales;f__Burkholderiaceae;g__Oxalobacter	0.14494580342533	0.00597968907807966	0.142150219426145	1
k__Fungi;p__Ascomycota;c__Sordariomycetes;o__Hypocreales;f__Nectriaceae;g__Fusarium	D_0__Bacteria;p__Proteobacteria;D_2__Gammaproteobacteria;D_3__Betaproteobacteriales;f__Burkholderiaceae;g__Oxalobacter	0.14494580342533	0.00597968907807966	0.142150219426145	1
k__Fungi;p__Ascomycota;c__Dothideomycetes;o__Pleosporales;f__Pleosporaceae	D_0__Bacteria;p__Firmicutes;D_2__Clostridia;D_3__Clostridiales;f__Lachnospiraceae	0.14349980455813	0.00642312967663972	0.14805858237678	-1
k__Fungi;p__Ascomycota;c__Dothideomycetes;o__Pleosporales;f__Pleosporaceae;g__Alternaria	D_0__Bacteria;p__Firmicutes;D_2__Clostridia;D_3__Clostridiales;f__Lachnospiraceae	0.14349980455813	0.00642312967663972	0.14805858237678	-1
k__Fungi;p__Ascomycota;c__Sordariomycetes;o__Hypocreales;f__Cordycipitaceae	D_0__Bacteria;p__Firmicutes;D_2__Clostridia;D_3__Clostridiales;f__Lachnospiraceae;g__Shuttleworthia	0.143669438995025	0.00636965136060286	0.14805858237678	-1
k__Fungi;p__Ascomycota;c__Saccharomycetes;o__Saccharomycetales;f__Saccharomycetaceae;g__Saccharomyces	D_0__Bacteria;p__Actinobacteria;D_2__Coriobacteriia;D_3__Coriobacteriales;f__Atopobiaceae	0.14257918268556	0.00672031095618864	0.153607107570026	1
k__Fungi;p__Ascomycota;c__Saccharomycetes;o__Saccharomycetales;f__Incertae sedis	D_0__Bacteria;p__Firmicutes;D_2__Clostridia;D_3__Clostridiales;f__Lachnospiraceae;g__Anaerostipes	0.142219502894955	0.0068396616241635	0.155032330147706	1
k__Fungi;p__Ascomycota;c__Sordariomycetes;o__Hypocreales;f__Cordycipitaceae	D_0__Bacteria;p__Firmicutes;D_2__Bacilli;D_3__Lactobacillales;f__Streptococcaceae;g__Streptococcus	0.142005946300658	0.00691140291185532	0.155363767935921	-1
k__Fungi;p__Ascomycota;c__Saccharomycetes;o__Saccharomycetales;f__Incertae sedis	D_0__Bacteria;p__Firmicutes;D_2__Clostridia;D_3__Clostridiales;f__Ruminococcaceae;g__Faecalibacterium	0.141540615905865	0.00707001762030601	0.157626622354364	1
k__Fungi;p__Ascomycota;c__Sordariomycetes;o__Hypocreales;f__Nectriaceae	D_0__Bacteria;p__Firmicutes;D_2__Clostridia;D_3__Clostridiales;f__Lachnospiraceae;g__Lachnospiraceae UCG-001	0.139260274584968	0.00789438375862883	0.173167127608632	-1
k__Fungi;p__Ascomycota;c__Sordariomycetes;o__Hypocreales;f__Nectriaceae;g__Fusarium	D_0__Bacteria;p__Firmicutes;D_2__Clostridia;D_3__Clostridiales;f__Lachnospiraceae;g__Lachnospiraceae UCG-001	0.139260274584968	0.00789438375862883	0.173167127608632	-1
k__Fungi;p__Ascomycota;c__Saccharomycetes;o__Saccharomycetales;f__Saccharomycetaceae;g__Saccharomyces	D_0__Bacteria;p__Firmicutes;D_2__Clostridia;D_3__Clostridiales;f__Family XIII;Other	0.137994683908282	0.00838726746719098	0.182506940086076	1
k__Fungi;p__Ascomycota;c__Saccharomycetes;o__Saccharomycetales;f__Incertae sedis;g__Debaryomyces	D_0__Bacteria;p__Actinobacteria;D_2__Coriobacteriia;D_3__Coriobacteriales;f__Eggerthellaceae;g__uncultured	0.136563446319187	0.00897685736011156	0.190758218902371	1
k__Fungi;p__Ascomycota;c__Sordariomycetes;o__Hypocreales;f__Nectriaceae	D_0__Bacteria;p__Firmicutes;D_2__Clostridia;D_3__Clostridiales;f__Lachnospiraceae;g__Coprococcus 1	0.136674383529375	0.00892989953967327	0.190758218902371	-1
k__Fungi;p__Ascomycota;c__Sordariomycetes;o__Hypocreales;f__Nectriaceae;g__Fusarium	D_0__Bacteria;p__Firmicutes;D_2__Clostridia;D_3__Clostridiales;f__Lachnospiraceae;g__Coprococcus 1	0.136674383529375	0.00892989953967327	0.190758218902371	-1
k__Fungi;p__Ascomycota;c__Sordariomycetes;o__Hypocreales;f__Nectriaceae	D_0__Bacteria;p__Firmicutes;D_2__Clostridia;D_3__Clostridiales;f__Family XIII	0.135246610225881	0.00955090304992046	0.199834279198336	-1
k__Fungi;p__Ascomycota;c__Sordariomycetes;o__Hypocreales;f__Nectriaceae;g__Fusarium	D_0__Bacteria;p__Firmicutes;D_2__Clostridia;D_3__Clostridiales;f__Family XIII	0.135246610225881	0.00955090304992046	0.199834279198336	-1
k__Fungi;p__Ascomycota;c__Saccharomycetes;o__Saccharomycetales;f__Saccharomycetaceae	D_0__Bacteria;p__Firmicutes;D_2__Clostridia;D_3__Clostridiales;f__Lachnospiraceae;g__Fusicatenibacter	0.134419496285252	0.00992756898625258	0.206129676661122	-1
k__Fungi;p__Ascomycota;c__Saccharomycetes;o__Saccharomycetales;f__Incertae sedis	D_0__Bacteria;p__Firmicutes;D_2__Clostridia;D_3__Clostridiales;f__Lachnospiraceae;g__Lachnospiraceae NC2004 group	0.133651759309004	0.0102886756123854	0.212009073224912	-1
k__Fungi;p__Ascomycota;c__Saccharomycetes;o__Saccharomycetales;f__Incertae sedis	D_0__Bacteria;p__Firmicutes;D_2__Clostridia;D_3__Clostridiales;f__Christensenellaceae;g__Christensenellaceae R-7 group	0.131074990789106	0.0115852248340591	0.236930913899555	-1
k__Fungi;p__Ascomycota;c__Saccharomycetes;o__Saccharomycetales;f__Incertae sedis	D_0__Bacteria;p__Firmicutes;D_2__Clostridia;D_3__Clostridiales;f__Lachnospiraceae;g__Agathobacter	0.130822633883221	0.0117194827225211	0.237888007501921	1
k__Fungi;p__Ascomycota;c__Saccharomycetes;o__Saccharomycetales;f__Incertae sedis	D_0__Bacteria;p__Firmicutes;D_2__Clostridia;D_3__Clostridiales;f__Christensenellaceae	0.130352009387696	0.0119734543397584	0.241242931882539	-1
k__Fungi;p__Ascomycota;c__Sordariomycetes;o__Hypocreales;f__Cordycipitaceae	D_0__Bacteria;p__Firmicutes;D_2__Clostridia;D_3__Clostridiales;f__Lachnospiraceae;g__Lachnospiraceae FCS020 group	0.129392695263592	0.0125058846450397	0.243391904293303	-1
k__Fungi;p__Ascomycota;c__Sordariomycetes;o__Hypocreales;f__Nectriaceae	D_0__Bacteria;p__Firmicutes;D_2__Clostridia;D_3__Clostridiales;f__Lachnospiraceae;g__Lachnospiraceae UCG-006	0.129354455154207	0.0125275244856847	0.243391904293303	-1
k__Fungi;p__Ascomycota;c__Sordariomycetes;o__Hypocreales;f__Nectriaceae;g__Fusarium	D_0__Bacteria;p__Firmicutes;D_2__Clostridia;D_3__Clostridiales;f__Lachnospiraceae;g__Lachnospiraceae UCG-006	0.129354455154207	0.0125275244856847	0.243391904293303	-1
k__Fungi;p__Ascomycota;c__Dothideomycetes;o__Pleosporales;f__Pleosporaceae	D_0__Bacteria;p__Firmicutes;D_2__Clostridia;D_3__Clostridiales;f__Lachnospiraceae;g__[Eubacterium] oxidoreducens group	0.129407299648309	0.012497628616017	0.243391904293303	-1
k__Fungi;p__Ascomycota;c__Dothideomycetes;o__Pleosporales;f__Pleosporaceae;g__Alternaria	D_0__Bacteria;p__Firmicutes;D_2__Clostridia;D_3__Clostridiales;f__Lachnospiraceae;g__[Eubacterium] oxidoreducens group	0.129407299648309	0.012497628616017	0.243391904293303	-1
k__Fungi;p__Ascomycota;c__Sordariomycetes;o__Hypocreales;f__Nectriaceae	D_0__Bacteria;p__Firmicutes;D_2__Bacilli;D_3__Lactobacillales;f__Streptococcaceae	0.128466824849866	0.0130389704511373	0.246704157693662	-1
k__Fungi;p__Ascomycota;c__Sordariomycetes;o__Hypocreales;f__Nectriaceae;g__Fusarium	D_0__Bacteria;p__Firmicutes;D_2__Bacilli;D_3__Lactobacillales;f__Streptococcaceae	0.128466824849866	0.0130389704511373	0.246704157693662	-1
k__Fungi;p__Ascomycota;c__Saccharomycetes;o__Saccharomycetales;f__Saccharomycetaceae;g__Saccharomyces	D_0__Bacteria;p__Firmicutes;D_2__Clostridia;D_3__Clostridiales;f__Lachnospiraceae;g__Fusicatenibacter	0.128820533004194	0.0128330534101883	0.246704157693662	-1
k__Fungi;p__Ascomycota;c__Sordariomycetes;o__Hypocreales;f__Nectriaceae	D_0__Bacteria;p__Firmicutes;D_2__Clostridia;D_3__Clostridiales;f__Ruminococcaceae;g__Ruminococcaceae NK4A214 group	0.128275541770186	0.0131515084064636	0.246704157693662	1
k__Fungi;p__Ascomycota;c__Sordariomycetes;o__Hypocreales;f__Nectriaceae;g__Fusarium	D_0__Bacteria;p__Firmicutes;D_2__Clostridia;D_3__Clostridiales;f__Ruminococcaceae;g__Ruminococcaceae NK4A214 group	0.128275541770186	0.0131515084064636	0.246704157693662	1
k__Fungi;p__Ascomycota;c__Sordariomycetes;o__Hypocreales;f__Nectriaceae	D_0__Bacteria;p__Firmicutes;D_2__Clostridia;D_3__Clostridiales;f__Lachnospiraceae;g__Marvinbryantia	0.127122660777497	0.0138476224567148	0.256228116205879	-1
k__Fungi;p__Ascomycota;c__Sordariomycetes;o__Hypocreales;f__Nectriaceae;g__Fusarium	D_0__Bacteria;p__Firmicutes;D_2__Clostridia;D_3__Clostridiales;f__Lachnospiraceae;g__Marvinbryantia	0.127122660777497	0.0138476224567148	0.256228116205879	-1
k__Fungi;p__Ascomycota;c__Sordariomycetes;o__Hypocreales;f__Nectriaceae	D_0__Bacteria;p__Firmicutes;D_2__Clostridia;D_3__Clostridiales;f__Lachnospiraceae;g__[Ruminococcus] gauvreauii group	0.125558397958199	0.0148425125274929	0.270950564260273	-1
k__Fungi;p__Ascomycota;c__Sordariomycetes;o__Hypocreales;f__Nectriaceae;g__Fusarium	D_0__Bacteria;p__Firmicutes;D_2__Clostridia;D_3__Clostridiales;f__Lachnospiraceae;g__[Ruminococcus] gauvreauii group	0.125558397958199	0.0148425125274929	0.270950564260273	-1
k__Fungi;p__Ascomycota;c__Sordariomycetes;o__Hypocreales;f__Nectriaceae	D_0__Bacteria;p__Firmicutes;D_2__Clostridia;D_3__Clostridiales;f__Ruminococcaceae;g__Ruminococcaceae UCG-005	0.125212022608358	0.0150708989404618	0.271475795483815	1
k__Fungi;p__Ascomycota;c__Sordariomycetes;o__Hypocreales;f__Nectriaceae;g__Fusarium	D_0__Bacteria;p__Firmicutes;D_2__Clostridia;D_3__Clostridiales;f__Ruminococcaceae;g__Ruminococcaceae UCG-005	0.125212022608358	0.0150708989404618	0.271475795483815	1
k__Fungi;p__Ascomycota;c__Sordariomycetes;o__Hypocreales;f__Nectriaceae	D_0__Bacteria;p__Firmicutes;D_2__Clostridia;D_3__Clostridiales;f__Lachnospiraceae;g__Lachnoclostridium	0.12438508387563	0.0156283305878078	0.277836988227694	-1
k__Fungi;p__Ascomycota;c__Sordariomycetes;o__Hypocreales;f__Nectriaceae;g__Fusarium	D_0__Bacteria;p__Firmicutes;D_2__Clostridia;D_3__Clostridiales;f__Lachnospiraceae;g__Lachnoclostridium	0.12438508387563	0.0156283305878078	0.277836988227694	-1
k__Fungi;p__Ascomycota;c__Saccharomycetes;o__Saccharomycetales;f__Incertae sedis;g__Candida	D_0__Bacteria;p__Firmicutes;D_2__Clostridia;D_3__Clostridiales;f__Defluviitaleaceae	0.123988558473887	0.0159018088945208	0.279051098019977	-1
k__Fungi;p__Ascomycota;c__Saccharomycetes;o__Saccharomycetales;f__Incertae sedis;g__Candida	D_0__Bacteria;p__Firmicutes;D_2__Clostridia;D_3__Clostridiales;f__Defluviitaleaceae;g__Defluviitaleaceae UCG-011	0.123988558473887	0.0159018088945208	0.279051098019977	-1
k__Fungi;p__Ascomycota;c__Saccharomycetes;o__Saccharomycetales;f__Incertae sedis;g__Debaryomyces	D_0__Bacteria;p__Firmicutes;D_2__Erysipelotrichia;D_3__Erysipelotrichales;f__Erysipelotrichaceae;g__Erysipelotrichaceae UCG-003	0.123571859750455	0.0161935893390458	0.282349762834645	1
k__Fungi;p__Basidiomycota;c__Tremellomycetes;o__Filobasidiales;f__Filobasidiaceae	D_0__Bacteria;p__Firmicutes;D_2__Clostridia;D_3__Clostridiales;f__Clostridiales vadinBB60 group	0.12264244347745	0.0168608620644908	0.288331868884642	1
k__Fungi;p__Basidiomycota;c__Tremellomycetes;o__Filobasidiales;f__Filobasidiaceae;g__Filobasidium	D_0__Bacteria;p__Firmicutes;D_2__Clostridia;D_3__Clostridiales;f__Clostridiales vadinBB60 group	0.12264244347745	0.0168608620644908	0.288331868884642	1
k__Fungi;p__Basidiomycota;c__Tremellomycetes;o__Filobasidiales;f__Filobasidiaceae	D_0__Bacteria;p__Firmicutes;D_2__Clostridia;D_3__Clostridiales;f__Clostridiales vadinBB60 group;g__uncultured bacterium	0.122506089801263	0.0169606981696848	0.288331868884642	1
k__Fungi;p__Basidiomycota;c__Tremellomycetes;o__Filobasidiales;f__Filobasidiaceae;g__Filobasidium	D_0__Bacteria;p__Firmicutes;D_2__Clostridia;D_3__Clostridiales;f__Clostridiales vadinBB60 group;g__uncultured bacterium	0.122506089801263	0.0169606981696848	0.288331868884642	1
k__Fungi;p__Ascomycota;c__Sordariomycetes;o__Hypocreales;f__Nectriaceae	D_0__Bacteria;p__Firmicutes;D_2__Clostridia;D_3__Clostridiales;f__Lachnospiraceae;g__Lachnospiraceae NK4A136 group	0.122038638212785	0.0173067847132956	0.290583051976321	-1
k__Fungi;p__Ascomycota;c__Sordariomycetes;o__Hypocreales;f__Nectriaceae;g__Fusarium	D_0__Bacteria;p__Firmicutes;D_2__Clostridia;D_3__Clostridiales;f__Lachnospiraceae;g__Lachnospiraceae NK4A136 group	0.122038638212785	0.0173067847132956	0.290583051976321	-1
k__Fungi;p__Ascomycota;c__Sordariomycetes;o__Hypocreales;f__Cordycipitaceae	D_0__Bacteria;p__Firmicutes;D_2__Clostridia;D_3__Clostridiales;f__Family XIII;g__Family XIII AD3011 group	0.121379792163885	0.0178047518961293	0.295455255933757	-1
k__Fungi;p__Ascomycota;c__Sordariomycetes;o__Hypocreales;f__Cordycipitaceae	D_0__Bacteria;p__Firmicutes;D_2__Clostridia;D_3__Clostridiales;f__Ruminococcaceae;g__Faecalibacterium	0.121367425431376	0.0178142139607118	0.295455255933757	-1
k__Fungi;p__Ascomycota;c__Dothideomycetes;o__Pleosporales;f__Pleosporaceae	D_0__Bacteria;p__Firmicutes;D_2__Clostridia;D_3__Clostridiales;f__Lachnospiraceae;g__uncultured	0.120959929411741	0.0181283942060316	0.297043567713289	-1
k__Fungi;p__Ascomycota;c__Dothideomycetes;o__Pleosporales;f__Pleosporaceae;g__Alternaria	D_0__Bacteria;p__Firmicutes;D_2__Clostridia;D_3__Clostridiales;f__Lachnospiraceae;g__uncultured	0.120959929411741	0.0181283942060316	0.297043567713289	-1
k__Fungi;p__Ascomycota;c__Sordariomycetes;o__Hypocreales;f__Cordycipitaceae	D_0__Bacteria;p__Firmicutes;D_2__Clostridia;D_3__Clostridiales;f__Ruminococcaceae	0.119580264723671	0.0192272285035756	0.313162045088178	1
k__Fungi;p__Ascomycota;c__Saccharomycetes;o__Saccharomycetales;f__Saccharomycetaceae	D_0__Bacteria;p__Firmicutes;D_2__Clostridia;D_3__Clostridiales;f__Christensenellaceae;g__uncultured	0.118621784769067	0.0200233364315865	0.324187351749496	1
k__Fungi;p__Basidiomycota;c__Tremellomycetes;o__Filobasidiales;f__Filobasidiaceae	D_0__Bacteria;p__Actinobacteria;D_2__Actinobacteria;D_3__Propionibacteriales;f__Propionibacteriaceae	0.117481433314117	0.0210065736229123	0.327651468059655	-1
k__Fungi;p__Basidiomycota;c__Tremellomycetes;o__Filobasidiales;f__Filobasidiaceae;g__Filobasidium	D_0__Bacteria;p__Actinobacteria;D_2__Actinobacteria;D_3__Propionibacteriales;f__Propionibacteriaceae	0.117481433314117	0.0210065736229123	0.327651468059655	-1
k__Fungi;p__Basidiomycota;c__Tremellomycetes;o__Filobasidiales;f__Filobasidiaceae	D_0__Bacteria;p__Actinobacteria;D_2__Actinobacteria;D_3__Propionibacteriales;f__Propionibacteriaceae;g__Propionibacterium	0.117481433314117	0.0210065736229123	0.327651468059655	-1
k__Fungi;p__Basidiomycota;c__Tremellomycetes;o__Filobasidiales;f__Filobasidiaceae;g__Filobasidium	D_0__Bacteria;p__Actinobacteria;D_2__Actinobacteria;D_3__Propionibacteriales;f__Propionibacteriaceae;g__Propionibacterium	0.117481433314117	0.0210065736229123	0.327651468059655	-1
k__Fungi;p__Ascomycota;c__Dothideomycetes;o__Pleosporales;f__Pleosporaceae	D_0__Bacteria;p__Firmicutes;D_2__Clostridia;D_3__Clostridiales;f__Lachnospiraceae;g__Agathobacter	0.117992214608859	0.020561251097721	0.327651468059655	-1
k__Fungi;p__Ascomycota;c__Dothideomycetes;o__Pleosporales;f__Pleosporaceae;g__Alternaria	D_0__Bacteria;p__Firmicutes;D_2__Clostridia;D_3__Clostridiales;f__Lachnospiraceae;g__Agathobacter	0.117992214608859	0.020561251097721	0.327651468059655	-1
k__Fungi;p__Ascomycota;c__Saccharomycetes;o__Saccharomycetales;f__Incertae sedis	D_0__Bacteria;p__Firmicutes;D_2__Clostridia;D_3__Clostridiales;f__Lachnospiraceae;g__GCA-900066575	0.117397505191623	0.0210805172464852	0.327651468059655	1
k__Fungi;p__Ascomycota;c__Saccharomycetes;o__Saccharomycetales;f__Incertae sedis;g__Debaryomyces	D_0__Bacteria;p__Firmicutes;D_2__Clostridia;D_3__Clostridiales;f__Clostridiaceae 1	0.116096550916216	0.0222550121293901	0.329448148713846	-1
k__Fungi;p__Ascomycota;c__Sordariomycetes;o__Hypocreales;f__Nectriaceae	D_0__Bacteria;p__Firmicutes;D_2__Clostridia;D_3__Clostridiales;f__Peptostreptococcaceae	0.114943825140042	0.0233411237579551	0.329448148713846	-1
k__Fungi;p__Ascomycota;c__Sordariomycetes;o__Hypocreales;f__Nectriaceae;g__Fusarium	D_0__Bacteria;p__Firmicutes;D_2__Clostridia;D_3__Clostridiales;f__Peptostreptococcaceae	0.114943825140042	0.0233411237579551	0.329448148713846	-1
k__Fungi;p__Ascomycota;c__Dothideomycetes;o__Capnodiales;f__Davidiellaceae	D_0__Bacteria;p__Proteobacteria;D_2__Deltaproteobacteria;D_3__Desulfovibrionales;f__Desulfovibrionaceae	0.115944041958178	0.0223962264691531	0.329448148713846	-1
k__Fungi;p__Ascomycota;c__Dothideomycetes;o__Capnodiales;f__Davidiellaceae;g__Davidiella	D_0__Bacteria;p__Proteobacteria;D_2__Deltaproteobacteria;D_3__Desulfovibrionales;f__Desulfovibrionaceae	0.115944041958178	0.0223962264691531	0.329448148713846	-1
k__Fungi;p__Ascomycota;c__Saccharomycetes;o__Saccharomycetales;f__Saccharomycetaceae	D_0__Bacteria;p__Actinobacteria;D_2__Coriobacteriia;D_3__Coriobacteriales;f__Eggerthellaceae;g__uncultured	0.115131020608752	0.0231617852962042	0.329448148713846	-1
k__Fungi;p__Ascomycota;c__Sordariomycetes;o__Hypocreales;f__Nectriaceae	D_0__Bacteria;p__Firmicutes;D_2__Bacilli;D_3__Lactobacillales;f__Streptococcaceae;g__Streptococcus	0.11660617717856	0.0217885389115506	0.329448148713846	-1
k__Fungi;p__Ascomycota;c__Sordariomycetes;o__Hypocreales;f__Nectriaceae;g__Fusarium	D_0__Bacteria;p__Firmicutes;D_2__Bacilli;D_3__Lactobacillales;f__Streptococcaceae;g__Streptococcus	0.11660617717856	0.0217885389115506	0.329448148713846	-1
k__Fungi;p__Ascomycota;c__Saccharomycetes;o__Saccharomycetales;f__Saccharomycetaceae;g__Saccharomyces	D_0__Bacteria;p__Firmicutes;D_2__Clostridia;D_3__Clostridiales;f__Christensenellaceae;g__uncultured	0.116033309715403	0.0223134787952701	0.329448148713846	1
k__Fungi;p__Ascomycota;c__Saccharomycetes;o__Saccharomycetales;f__Incertae sedis;g__Debaryomyces	D_0__Bacteria;p__Firmicutes;D_2__Clostridia;D_3__Clostridiales;f__Lachnospiraceae;g__CAG-56	0.117045951768995	0.0213926336072292	0.329448148713846	1
k__Fungi;p__Ascomycota;c__Eurotiomycetes;o__Eurotiales;f__Trichocomaceae	D_0__Bacteria;p__Firmicutes;D_2__Clostridia;D_3__Clostridiales;f__Lachnospiraceae;g__Hungatella	0.114907265704936	0.0233762840815339	0.329448148713846	-1
k__Fungi;p__Ascomycota;c__Eurotiomycetes;o__Eurotiales;f__Trichocomaceae;g__Penicillium	D_0__Bacteria;p__Firmicutes;D_2__Clostridia;D_3__Clostridiales;f__Lachnospiraceae;g__Hungatella	0.114907265704936	0.0233762840815339	0.329448148713846	-1
k__Fungi;p__Ascomycota;c__Saccharomycetes;o__Saccharomycetales;f__Saccharomycetaceae;g__Saccharomyces	D_0__Bacteria;p__Firmicutes;D_2__Clostridia;D_3__Clostridiales;f__Lachnospiraceae;g__Lachnospiraceae NK4A136 group	0.115709184863141	0.0226151604863778	0.329448148713846	1
k__Fungi;p__Ascomycota;c__Saccharomycetes;o__Saccharomycetales;f__Incertae sedis	D_0__Bacteria;p__Firmicutes;D_2__Clostridia;D_3__Clostridiales;f__Peptococcaceae;g__Peptococcus	0.115152906917023	0.0231408931703592	0.329448148713846	-1
k__Fungi;p__Ascomycota;c__Dothideomycetes;o__Pleosporales;f__Pleosporaceae	D_0__Bacteria;p__Firmicutes;D_2__Clostridia;D_3__Clostridiales;f__Ruminococcaceae;g__Ruminiclostridium 5	0.115442443641004	0.0228659912689058	0.329448148713846	-1
k__Fungi;p__Ascomycota;c__Dothideomycetes;o__Pleosporales;f__Pleosporaceae;g__Alternaria	D_0__Bacteria;p__Firmicutes;D_2__Clostridia;D_3__Clostridiales;f__Ruminococcaceae;g__Ruminiclostridium 5	0.115442443641004	0.0228659912689058	0.329448148713846	-1
k__Fungi;p__Ascomycota;c__Dothideomycetes;o__Capnodiales;f__Davidiellaceae	D_0__Bacteria;p__Proteobacteria;D_2__Deltaproteobacteria;D_3__Desulfovibrionales;f__Desulfovibrionaceae;g__Desulfovibrio	0.115944041958178	0.0223962264691531	0.329448148713846	-1
k__Fungi;p__Ascomycota;c__Dothideomycetes;o__Capnodiales;f__Davidiellaceae;g__Davidiella	D_0__Bacteria;p__Proteobacteria;D_2__Deltaproteobacteria;D_3__Desulfovibrionales;f__Desulfovibrionaceae;g__Desulfovibrio	0.115944041958178	0.0223962264691531	0.329448148713846	-1
k__Fungi;p__Basidiomycota;c__Tremellomycetes;o__Filobasidiales;f__Filobasidiaceae	D_0__Bacteria;p__Firmicutes;D_2__Clostridia;D_3__Clostridiales;f__Ruminococcaceae;g__Ruminococcaceae UCG-014	0.114594864373621	0.0236785422151798	0.330285306796355	-1
k__Fungi;p__Basidiomycota;c__Tremellomycetes;o__Filobasidiales;f__Filobasidiaceae;g__Filobasidium	D_0__Bacteria;p__Firmicutes;D_2__Clostridia;D_3__Clostridiales;f__Ruminococcaceae;g__Ruminococcaceae UCG-014	0.114594864373621	0.0236785422151798	0.330285306796355	-1
k__Fungi;p__Ascomycota;c__Saccharomycetes;o__Saccharomycetales;f__Incertae sedis;g__Debaryomyces	D_0__Bacteria;p__Firmicutes;D_2__Clostridia;D_3__Clostridiales;f__Clostridiaceae 1;g__Clostridium sensu stricto 1	0.114353533260313	0.02391427030523	0.330418151645296	-1
k__Fungi;p__Ascomycota;c__Eurotiomycetes;o__Eurotiales;f__Trichocomaceae	D_0__Bacteria;p__Firmicutes;D_2__Clostridia;D_3__Clostridiales;f__Family XI;g__Parvimonas	0.114212944037859	0.0240524978035914	0.330418151645296	1
k__Fungi;p__Ascomycota;c__Eurotiomycetes;o__Eurotiales;f__Trichocomaceae;g__Penicillium	D_0__Bacteria;p__Firmicutes;D_2__Clostridia;D_3__Clostridiales;f__Family XI;g__Parvimonas	0.114212944037859	0.0240524978035914	0.330418151645296	1
k__Fungi;p__Basidiomycota;c__Tremellomycetes;o__Filobasidiales;f__Filobasidiaceae	D_0__Bacteria;p__Firmicutes;D_2__Negativicutes;D_3__Selenomonadales;f__Veillonellaceae;g__Veillonella	0.113959510415601	0.0243033612551981	0.330525713070694	-1
k__Fungi;p__Basidiomycota;c__Tremellomycetes;o__Filobasidiales;f__Filobasidiaceae;g__Filobasidium	D_0__Bacteria;p__Firmicutes;D_2__Negativicutes;D_3__Selenomonadales;f__Veillonellaceae;g__Veillonella	0.113959510415601	0.0243033612551981	0.330525713070694	-1
k__Fungi;p__Ascomycota;c__Saccharomycetes;o__Saccharomycetales;f__Saccharomycetaceae;g__Saccharomyces	D_0__Bacteria;p__Firmicutes;D_2__Clostridia;D_3__Clostridiales;f__Lachnospiraceae;g__[Eubacterium] ruminantium group	0.112936198870747	0.0253386337606351	0.342397931066689	1
k__Fungi;p__Ascomycota;c__Sordariomycetes;o__Hypocreales;f__Nectriaceae	D_0__Bacteria;p__Firmicutes;D_2__Clostridia;D_3__Clostridiales;f__Peptostreptococcaceae;g__uncultured	0.112727750527921	0.0255539632376978	0.342397931066689	-1
k__Fungi;p__Ascomycota;c__Sordariomycetes;o__Hypocreales;f__Nectriaceae;g__Fusarium	D_0__Bacteria;p__Firmicutes;D_2__Clostridia;D_3__Clostridiales;f__Peptostreptococcaceae;g__uncultured	0.112727750527921	0.0255539632376978	0.342397931066689	-1
k__Fungi;p__Ascomycota;c__Saccharomycetes;o__Saccharomycetales;f__Saccharomycetaceae;g__Saccharomyces	D_0__Bacteria;p__Actinobacteria;D_2__Coriobacteriia;D_3__Coriobacteriales;f__Eggerthellaceae;g__uncultured	0.111326135322012	0.0270417694682048	0.358881197000626	-1
k__Fungi;p__Ascomycota;c__Saccharomycetes;o__Saccharomycetales;f__Saccharomycetaceae;g__Saccharomyces	D_0__Bacteria;p__Firmicutes;D_2__Clostridia;D_3__Clostridiales;f__Lachnospiraceae;g__[Eubacterium] fissicatena group	0.111320373104764	0.0270480313915913	0.358881197000626	1
k__Fungi;p__Ascomycota;c__Saccharomycetes;o__Saccharomycetales;f__Saccharomycetaceae	D_0__Bacteria;p__Firmicutes;D_2__Clostridia;D_3__Clostridiales;f__Family XIII	0.110604900165224	0.027834960332358	0.367529573320455	1
k__Fungi;p__Ascomycota;c__Sordariomycetes;o__Hypocreales;f__Nectriaceae	D_0__Bacteria;p__Actinobacteria;D_2__Actinobacteria;D_3__Actinomycetales;f__Actinomycetaceae	0.109734678243816	0.0288175771474621	0.376401344426358	-1
k__Fungi;p__Ascomycota;c__Sordariomycetes;o__Hypocreales;f__Nectriaceae;g__Fusarium	D_0__Bacteria;p__Actinobacteria;D_2__Actinobacteria;D_3__Actinomycetales;f__Actinomycetaceae	0.109734678243816	0.0288175771474621	0.376401344426358	-1
k__Fungi;p__Basidiomycota;c__Tremellomycetes;o__Filobasidiales;f__Filobasidiaceae	D_0__Bacteria;p__Firmicutes;D_2__Clostridia;D_3__Clostridiales;f__Lachnospiraceae;g__CAG-56	0.109403680176323	0.0291987807624858	0.376401344426358	1
k__Fungi;p__Basidiomycota;c__Tremellomycetes;o__Filobasidiales;f__Filobasidiaceae;g__Filobasidium	D_0__Bacteria;p__Firmicutes;D_2__Clostridia;D_3__Clostridiales;f__Lachnospiraceae;g__CAG-56	0.109403680176323	0.0291987807624858	0.376401344426358	1
k__Fungi;p__Ascomycota;c__Sordariomycetes;o__Hypocreales;f__Cordycipitaceae	D_0__Bacteria;p__Firmicutes;D_2__Clostridia;D_3__Clostridiales;f__Lachnospiraceae;g__Lachnospiraceae NK4A136 group	0.109494295764134	0.0290940086785407	0.376401344426358	-1
k__Fungi;p__Basidiomycota;c__Tremellomycetes;o__Filobasidiales;f__Filobasidiaceae	D_0__Bacteria;p__Firmicutes;D_2__Negativicutes;D_3__Selenomonadales;f__Veillonellaceae;g__Dialister	0.108810690517982	0.0298921333439173	0.381721139415282	1
k__Fungi;p__Basidiomycota;c__Tremellomycetes;o__Filobasidiales;f__Filobasidiaceae;g__Filobasidium	D_0__Bacteria;p__Firmicutes;D_2__Negativicutes;D_3__Selenomonadales;f__Veillonellaceae;g__Dialister	0.108810690517982	0.0298921333439173	0.381721139415282	1
k__Fungi;p__Ascomycota;c__Sordariomycetes;o__Hypocreales;f__Nectriaceae	D_0__Bacteria;p__Actinobacteria;D_2__Actinobacteria;D_3__Actinomycetales;f__Actinomycetaceae;g__Actinomyces	0.108325498376888	0.0304695005030788	0.385182767462667	-1
k__Fungi;p__Ascomycota;c__Sordariomycetes;o__Hypocreales;f__Nectriaceae;g__Fusarium	D_0__Bacteria;p__Actinobacteria;D_2__Actinobacteria;D_3__Actinomycetales;f__Actinomycetaceae;g__Actinomyces	0.108325498376888	0.0304695005030788	0.385182767462667	-1
k__Fungi;p__Ascomycota;c__Saccharomycetes;o__Saccharomycetales;f__Incertae sedis	D_0__Bacteria;p__Firmicutes;D_2__Clostridia;D_3__Clostridiales;f__Lachnospiraceae;g__[Eubacterium] hallii group	0.107992326602465	0.0308712659216402	0.385182767462667	1
k__Fungi;p__Ascomycota;c__Dothideomycetes;o__Pleosporales;f__Pleosporaceae	D_0__Bacteria;p__Firmicutes;D_2__Clostridia;D_3__Clostridiales;f__Ruminococcaceae;g__Anaerotruncus	0.10810222855273	0.0307382578093609	0.385182767462667	-1
k__Fungi;p__Ascomycota;c__Dothideomycetes;o__Pleosporales;f__Pleosporaceae;g__Alternaria	D_0__Bacteria;p__Firmicutes;D_2__Clostridia;D_3__Clostridiales;f__Ruminococcaceae;g__Anaerotruncus	0.10810222855273	0.0307382578093609	0.385182767462667	-1
k__Fungi;p__Ascomycota;c__Sordariomycetes;o__Hypocreales;f__Cordycipitaceae	D_0__Bacteria;p__Proteobacteria;D_2__Gammaproteobacteria;D_3__Betaproteobacteriales;f__Burkholderiaceae;g__Sutterella	0.10736621760537	0.0316380807945662	0.392947852790959	1
k__Fungi;p__Basidiomycota;c__Tremellomycetes;o__Filobasidiales;f__Filobasidiaceae	D_0__Bacteria;p__Tenericutes;D_2__Mollicutes;D_3__Mollicutes RF39;f__uncultured bacterium	0.106208303446924	0.0330974611769538	0.401781594074191	-1
k__Fungi;p__Basidiomycota;c__Tremellomycetes;o__Filobasidiales;f__Filobasidiaceae;g__Filobasidium	D_0__Bacteria;p__Tenericutes;D_2__Mollicutes;D_3__Mollicutes RF39;f__uncultured bacterium	0.106208303446924	0.0330974611769538	0.401781594074191	-1
k__Fungi;p__Ascomycota;c__Dothideomycetes;o__Pleosporales;f__Pleosporaceae	D_0__Bacteria;Other;Other;Other;Other	0.105872368927067	0.0335310374466329	0.401781594074191	-1
k__Fungi;p__Ascomycota;c__Dothideomycetes;o__Pleosporales;f__Pleosporaceae;g__Alternaria	D_0__Bacteria;Other;Other;Other;Other	0.105872368927067	0.0335310374466329	0.401781594074191	-1
k__Fungi;p__Basidiomycota;c__Tremellomycetes;o__Filobasidiales;f__Filobasidiaceae	D_0__Bacteria;p__Tenericutes;D_2__Mollicutes;D_3__Mollicutes RF39;f__uncultured bacterium;g__uncultured bacterium	0.106208303446924	0.0330974611769538	0.401781594074191	-1
k__Fungi;p__Basidiomycota;c__Tremellomycetes;o__Filobasidiales;f__Filobasidiaceae;g__Filobasidium	D_0__Bacteria;p__Tenericutes;D_2__Mollicutes;D_3__Mollicutes RF39;f__uncultured bacterium;g__uncultured bacterium	0.106208303446924	0.0330974611769538	0.401781594074191	-1
k__Fungi;p__Ascomycota;c__Dothideomycetes;o__Pleosporales;f__Pleosporaceae	D_0__Bacteria;Other;Other;Other;Other;Other	0.105872368927067	0.0335310374466329	0.401781594074191	-1
k__Fungi;p__Ascomycota;c__Dothideomycetes;o__Pleosporales;f__Pleosporaceae;g__Alternaria	D_0__Bacteria;Other;Other;Other;Other;Other	0.105872368927067	0.0335310374466329	0.401781594074191	-1
k__Fungi;p__Basidiomycota;c__Tremellomycetes;o__Filobasidiales;f__Filobasidiaceae	D_0__Bacteria;p__Firmicutes;D_2__Clostridia;D_3__Clostridiales;f__Ruminococcaceae;g__Ruminococcus 2	0.105572502934114	0.0339219808075962	0.402916103915553	-1
k__Fungi;p__Basidiomycota;c__Tremellomycetes;o__Filobasidiales;f__Filobasidiaceae;g__Filobasidium	D_0__Bacteria;p__Firmicutes;D_2__Clostridia;D_3__Clostridiales;f__Ruminococcaceae;g__Ruminococcus 2	0.105572502934114	0.0339219808075962	0.402916103915553	-1
k__Fungi;p__Ascomycota;c__Sordariomycetes;o__Hypocreales;f__Cordycipitaceae	D_0__Bacteria;p__Firmicutes;D_2__Clostridia;D_3__Clostridiales;f__Ruminococcaceae;g__Ruminococcaceae UCG-009	0.10542255395649	0.0341188678491677	0.403492698042331	-1
k__Fungi;p__Ascomycota;c__Saccharomycetes;o__Saccharomycetales;f__Incertae sedis;g__Debaryomyces	D_0__Bacteria;p__Firmicutes;D_2__Clostridia;D_3__Clostridiales;f__Lachnospiraceae;g__Anaerostipes	0.104676885269862	0.0351118792860519	0.413438578606325	1
k__Fungi;p__Ascomycota;c__Sordariomycetes;o__Hypocreales;f__Cordycipitaceae	D_0__Bacteria;p__Firmicutes;D_2__Clostridia;D_3__Clostridiales;f__Ruminococcaceae;g__Ruminococcaceae UCG-002	0.104494234232722	0.0353586807852427	0.414550050585604	1
k__Fungi;p__Ascomycota;c__Saccharomycetes;o__Saccharomycetales;f__Incertae sedis;g__Candida	D_0__Bacteria;p__Firmicutes;D_2__Clostridia;D_3__Clostridiales;f__Lachnospiraceae;g__Tyzzerella 3	0.103904378311592	0.036165387972971	0.422188220113653	1
k__Fungi;p__Ascomycota;c__Dothideomycetes;o__Pleosporales;f__Pleosporaceae	D_0__Bacteria;p__Firmicutes;D_2__Clostridia;D_3__Clostridiales;f__Lachnospiraceae;g__Fusicatenibacter	0.102483567360554	0.0381701961901703	0.441799717605375	-1
k__Fungi;p__Ascomycota;c__Dothideomycetes;o__Pleosporales;f__Pleosporaceae;g__Alternaria	D_0__Bacteria;p__Firmicutes;D_2__Clostridia;D_3__Clostridiales;f__Lachnospiraceae;g__Fusicatenibacter	0.102483567360554	0.0381701961901703	0.441799717605375	-1
k__Fungi;p__Basidiomycota;c__Tremellomycetes;o__Filobasidiales;f__Filobasidiaceae	D_0__Bacteria;p__Firmicutes;D_2__Negativicutes;D_3__Selenomonadales;f__Veillonellaceae	0.101746064834584	0.0392458565523651	0.446647405114783	1
k__Fungi;p__Basidiomycota;c__Tremellomycetes;o__Filobasidiales;f__Filobasidiaceae;g__Filobasidium	D_0__Bacteria;p__Firmicutes;D_2__Negativicutes;D_3__Selenomonadales;f__Veillonellaceae	0.101746064834584	0.0392458565523651	0.446647405114783	1
k__Fungi;p__Ascomycota;c__Dothideomycetes;o__Capnodiales;f__Davidiellaceae	D_0__Bacteria;p__Firmicutes;D_2__Clostridia;D_3__Clostridiales;f__Ruminococcaceae;g__Ruminiclostridium 6	0.10187465992063	0.0390565513454473	0.446647405114783	-1
k__Fungi;p__Ascomycota;c__Dothideomycetes;o__Capnodiales;f__Davidiellaceae;g__Davidiella	D_0__Bacteria;p__Firmicutes;D_2__Clostridia;D_3__Clostridiales;f__Ruminococcaceae;g__Ruminiclostridium 6	0.10187465992063	0.0390565513454473	0.446647405114783	-1
k__Fungi;p__Ascomycota;c__Saccharomycetes;o__Saccharomycetales;f__Incertae sedis;g__Candida	D_0__Bacteria;p__Firmicutes;D_2__Clostridia;D_3__Clostridiales;f__Ruminococcaceae;g__Ruminococcaceae NK4A214 group	0.101330236532728	0.0398630894144654	0.451781680030608	-1
k__Fungi;p__Ascomycota;c__Saccharomycetes;o__Saccharomycetales;f__Saccharomycetaceae;g__Saccharomyces	D_0__Bacteria;p__Firmicutes;D_2__Clostridia;D_3__Clostridiales;f__Family XIII	0.100300043147134	0.0414261090260479	0.461658955023148	1
k__Fungi;p__Ascomycota;c__Sordariomycetes;o__Hypocreales;f__Cordycipitaceae	D_0__Bacteria;p__Firmicutes;D_2__Clostridia;D_3__Clostridiales;f__Christensenellaceae;g__Catabacter	0.100285040680365	0.0414492307929191	0.461658955023148	-1
k__Fungi;p__Ascomycota;c__Sordariomycetes;o__Hypocreales;f__Nectriaceae	D_0__Bacteria;p__Firmicutes;D_2__Clostridia;D_3__Clostridiales;f__Family XIII;g__[Eubacterium] brachy group	0.0998703796133382	0.0420924341344635	0.461658955023148	-1
k__Fungi;p__Ascomycota;c__Sordariomycetes;o__Hypocreales;f__Nectriaceae;g__Fusarium	D_0__Bacteria;p__Firmicutes;D_2__Clostridia;D_3__Clostridiales;f__Family XIII;g__[Eubacterium] brachy group	0.0998703796133382	0.0420924341344635	0.461658955023148	-1
k__Fungi;p__Ascomycota;c__Eurotiomycetes;o__Eurotiales;f__Trichocomaceae	D_0__Bacteria;p__Firmicutes;D_2__Clostridia;D_3__Clostridiales;f__Ruminococcaceae;g__Intestinimonas	0.100475284044188	0.0411567976474425	0.461658955023148	-1
k__Fungi;p__Ascomycota;c__Eurotiomycetes;o__Eurotiales;f__Trichocomaceae;g__Penicillium	D_0__Bacteria;p__Firmicutes;D_2__Clostridia;D_3__Clostridiales;f__Ruminococcaceae;g__Intestinimonas	0.100475284044188	0.0411567976474425	0.461658955023148	-1
k__Fungi;p__Ascomycota;c__Saccharomycetes;o__Saccharomycetales;f__Saccharomycetaceae	D_0__Bacteria;p__Firmicutes;D_2__Clostridia;D_3__Clostridiales;f__Ruminococcaceae;g__Ruminiclostridium	0.0998951071922881	0.042053853805724	0.461658955023148	1
k__Fungi;p__Ascomycota;c__Saccharomycetes;o__Saccharomycetales;f__Incertae sedis	D_0__Bacteria;p__Firmicutes;D_2__Clostridia;D_3__Clostridiales;f__Ruminococcaceae;g__Ruminococcaceae UCG-010	0.100117425123312	0.041708267672107	0.461658955023148	-1
k__Fungi;p__Ascomycota;c__Saccharomycetes;o__Saccharomycetales;f__Incertae sedis;g__Debaryomyces	D_0__Bacteria;p__Firmicutes;D_2__Negativicutes;D_3__Selenomonadales;f__Veillonellaceae;g__Dialister	0.099668558832164	0.0424083845175355	0.463256248544966	1
k__Fungi;p__Ascomycota;c__Sordariomycetes;o__Hypocreales;f__Nectriaceae	D_0__Bacteria;p__Firmicutes;D_2__Clostridia;D_3__Clostridiales;f__Lachnospiraceae;g__[Eubacterium] oxidoreducens group	0.0994380683392098	0.0427715488816109	0.4635004500318	-1
k__Fungi;p__Ascomycota;c__Sordariomycetes;o__Hypocreales;f__Nectriaceae;g__Fusarium	D_0__Bacteria;p__Firmicutes;D_2__Clostridia;D_3__Clostridiales;f__Lachnospiraceae;g__[Eubacterium] oxidoreducens group	0.0994380683392098	0.0427715488816109	0.4635004500318	-1
k__Fungi;p__Basidiomycota;c__Tremellomycetes;o__Filobasidiales;f__Filobasidiaceae	D_0__Bacteria;p__Actinobacteria;D_2__Coriobacteriia;D_3__Coriobacteriales;f__Eggerthellaceae;g__Senegalimassilia	0.099001004630356	0.0434670588270565	0.467313834030014	-1
k__Fungi;p__Basidiomycota;c__Tremellomycetes;o__Filobasidiales;f__Filobasidiaceae;g__Filobasidium	D_0__Bacteria;p__Actinobacteria;D_2__Coriobacteriia;D_3__Coriobacteriales;f__Eggerthellaceae;g__Senegalimassilia	0.099001004630356	0.0434670588270565	0.467313834030014	-1
k__Fungi;p__Ascomycota;c__Sordariomycetes;o__Hypocreales;f__Nectriaceae	Unassigned;Other;Other;Other;Other	0.0975935974670439	0.0457686063862	0.480658723438084	-1
k__Fungi;p__Ascomycota;c__Sordariomycetes;o__Hypocreales;f__Nectriaceae;g__Fusarium	Unassigned;Other;Other;Other;Other	0.0975935974670439	0.0457686063862	0.480658723438084	-1
k__Fungi;p__Basidiomycota;c__Tremellomycetes;o__Filobasidiales;f__Filobasidiaceae	D_0__Bacteria;p__Firmicutes;D_2__Clostridia;D_3__Clostridiales;f__Ruminococcaceae;Other	0.0977259005068754	0.0455481827604171	0.480658723438084	-1
k__Fungi;p__Basidiomycota;c__Tremellomycetes;o__Filobasidiales;f__Filobasidiaceae;g__Filobasidium	D_0__Bacteria;p__Firmicutes;D_2__Clostridia;D_3__Clostridiales;f__Ruminococcaceae;Other	0.0977259005068754	0.0455481827604171	0.480658723438084	-1
k__Fungi;p__Ascomycota;c__Sordariomycetes;o__Hypocreales;f__Nectriaceae	Unassigned;Other;Other;Other;Other;Other	0.0975935974670439	0.0457686063862	0.480658723438084	-1
k__Fungi;p__Ascomycota;c__Sordariomycetes;o__Hypocreales;f__Nectriaceae;g__Fusarium	Unassigned;Other;Other;Other;Other;Other	0.0975935974670439	0.0457686063862	0.480658723438084	-1
k__Fungi;p__Ascomycota;c__Dothideomycetes;o__Pleosporales;f__Pleosporaceae	D_0__Bacteria;p__Firmicutes;D_2__Clostridia;D_3__Clostridiales;Other	0.0966713482569595	0.0473289118899786	0.484392394276867	-1
k__Fungi;p__Ascomycota;c__Dothideomycetes;o__Pleosporales;f__Pleosporaceae;g__Alternaria	D_0__Bacteria;p__Firmicutes;D_2__Clostridia;D_3__Clostridiales;Other	0.0966713482569595	0.0473289118899786	0.484392394276867	-1
k__Fungi;p__Ascomycota;c__Sordariomycetes;o__Hypocreales;f__Nectriaceae	D_0__Bacteria;p__Firmicutes;D_2__Erysipelotrichia;D_3__Erysipelotrichales;f__Erysipelotrichaceae	0.0965784350837188	0.0474884306205251	0.484392394276867	-1
k__Fungi;p__Ascomycota;c__Sordariomycetes;o__Hypocreales;f__Nectriaceae;g__Fusarium	D_0__Bacteria;p__Firmicutes;D_2__Erysipelotrichia;D_3__Erysipelotrichales;f__Erysipelotrichaceae	0.0965784350837188	0.0474884306205251	0.484392394276867	-1
k__Fungi;p__Ascomycota;c__Dothideomycetes;o__Pleosporales;f__Pleosporaceae	D_0__Bacteria;p__Firmicutes;D_2__Clostridia;D_3__Clostridiales;f__Lachnospiraceae;g__Lachnospiraceae UCG-010	0.0963369776959966	0.0479049831104695	0.484392394276867	-1
k__Fungi;p__Ascomycota;c__Dothideomycetes;o__Pleosporales;f__Pleosporaceae;g__Alternaria	D_0__Bacteria;p__Firmicutes;D_2__Clostridia;D_3__Clostridiales;f__Lachnospiraceae;g__Lachnospiraceae UCG-010	0.0963369776959966	0.0479049831104695	0.484392394276867	-1
k__Fungi;p__Ascomycota;c__Saccharomycetes;o__Saccharomycetales;f__Saccharomycetaceae;g__Saccharomyces	D_0__Bacteria;p__Firmicutes;D_2__Clostridia;D_3__Clostridiales;f__Peptostreptococcaceae;g__Romboutsia	0.0964424292935916	0.047722705727923	0.484392394276867	1
k__Fungi;p__Ascomycota;c__Saccharomycetes;o__Saccharomycetales;f__Incertae sedis;g__Candida	D_0__Bacteria;p__Firmicutes;D_2__Clostridia;D_3__Clostridiales;f__Ruminococcaceae;g__Intestinimonas	0.0964479465510077	0.0477131841570888	0.484392394276867	1
k__Fungi;p__Ascomycota;c__Dothideomycetes;o__Pleosporales;f__Pleosporaceae	D_0__Bacteria;p__Firmicutes;D_2__Clostridia;D_3__Clostridiales;Other;Other	0.0966713482569595	0.0473289118899786	0.484392394276867	-1
k__Fungi;p__Ascomycota;c__Dothideomycetes;o__Pleosporales;f__Pleosporaceae;g__Alternaria	D_0__Bacteria;p__Firmicutes;D_2__Clostridia;D_3__Clostridiales;Other;Other	0.0966713482569595	0.0473289118899786	0.484392394276867	-1
k__Fungi;p__Ascomycota;c__Saccharomycetes;o__Saccharomycetales;f__Saccharomycetaceae;g__Saccharomyces	D_0__Bacteria;p__Firmicutes;D_2__Clostridia;D_3__Clostridiales;f__Lachnospiraceae;g__Lachnospiraceae UCG-001	0.0962125662472553	0.0481207459296957	0.484771958995453	-1
k__Fungi;p__Ascomycota;c__Saccharomycetes;o__Saccharomycetales;f__Saccharomycetaceae;g__Saccharomyces	D_0__Bacteria;p__Actinobacteria;D_2__Coriobacteriia;D_3__Coriobacteriales;f__Atopobiaceae;g__Olsenella	0.0952472877776395	0.0498211964139048	0.499717499281958	1
k__Fungi;p__Ascomycota;c__Saccharomycetes;o__Saccharomycetales;f__Incertae sedis	D_0__Bacteria;p__Firmicutes;D_2__Clostridia;D_3__Clostridiales;f__Ruminococcaceae;g__Ruminiclostridium	0.0951630922406452	0.0499717499281958	0.499717499281958	-1
k__Fungi;p__Ascomycota;c__Saccharomycetes;o__Saccharomycetales;f__Incertae sedis;g__Candida	D_0__Bacteria;p__Firmicutes;D_2__Clostridia;D_3__Clostridiales;f__Lachnospiraceae;g__Lachnospiraceae NK4A136 group	0.0950099917160159	0.0502464400919762	0.500623871978664	-1
k__Fungi;p__Ascomycota;c__Eurotiomycetes;o__Eurotiales;f__Trichocomaceae	D_0__Bacteria;p__Firmicutes;D_2__Clostridia;D_3__Clostridiales;f__Lachnospiraceae;g__Lachnospira	0.0943529602699295	0.0514388948252695	0.508777432453575	-1
k__Fungi;p__Ascomycota;c__Eurotiomycetes;o__Eurotiales;f__Trichocomaceae;g__Penicillium	D_0__Bacteria;p__Firmicutes;D_2__Clostridia;D_3__Clostridiales;f__Lachnospiraceae;g__Lachnospira	0.0943529602699295	0.0514388948252695	0.508777432453575	-1
k__Fungi;p__Ascomycota;c__Saccharomycetes;o__Saccharomycetales;f__Incertae sedis	D_0__Bacteria;p__Firmicutes;D_2__Clostridia;D_3__Clostridiales;f__Ruminococcaceae;g__Ruminococcaceae NK4A214 group	0.0935342657822818	0.0529559652051597	0.521884874485631	-1
k__Fungi;p__Ascomycota;c__Dothideomycetes;o__Pleosporales;f__Pleosporaceae	D_0__Bacteria;p__Bacteroidetes;D_2__Bacteroidia;D_3__Bacteroidales;f__Tannerellaceae	0.0924042805294121	0.0551076089299321	0.524613644439301	-1
k__Fungi;p__Ascomycota;c__Dothideomycetes;o__Pleosporales;f__Pleosporaceae;g__Alternaria	D_0__Bacteria;p__Bacteroidetes;D_2__Bacteroidia;D_3__Bacteroidales;f__Tannerellaceae	0.0924042805294121	0.0551076089299321	0.524613644439301	-1
k__Fungi;p__Ascomycota;c__Saccharomycetes;o__Saccharomycetales;f__Saccharomycetaceae	D_0__Bacteria;p__Actinobacteria;D_2__Coriobacteriia;D_3__Coriobacteriales;f__Atopobiaceae;g__Olsenella	0.0925510561433084	0.0548243057234821	0.524613644439301	1
k__Fungi;p__Ascomycota;c__Sordariomycetes;o__Hypocreales;f__Cordycipitaceae	D_0__Bacteria;p__Actinobacteria;D_2__Coriobacteriia;D_3__Coriobacteriales;f__Coriobacteriales Incertae Sedis;g__uncultured	0.0925073889287343	0.05490847131261	0.524613644439301	-1
k__Fungi;p__Ascomycota;c__Dothideomycetes;o__Pleosporales;f__Pleosporaceae	D_0__Bacteria;p__Bacteroidetes;D_2__Bacteroidia;D_3__Bacteroidales;f__Tannerellaceae;g__Parabacteroides	0.0924042805294121	0.0551076089299321	0.524613644439301	-1
k__Fungi;p__Ascomycota;c__Dothideomycetes;o__Pleosporales;f__Pleosporaceae;g__Alternaria	D_0__Bacteria;p__Bacteroidetes;D_2__Bacteroidia;D_3__Bacteroidales;f__Tannerellaceae;g__Parabacteroides	0.0924042805294121	0.0551076089299321	0.524613644439301	-1
k__Fungi;p__Ascomycota;c__Sordariomycetes;o__Hypocreales;f__Nectriaceae	D_0__Bacteria;p__Firmicutes;D_2__Clostridia;D_3__Clostridiales;f__Lachnospiraceae;g__Agathobacter	0.0927375369284055	0.0544660179632874	0.524613644439301	-1
k__Fungi;p__Ascomycota;c__Sordariomycetes;o__Hypocreales;f__Nectriaceae;g__Fusarium	D_0__Bacteria;p__Firmicutes;D_2__Clostridia;D_3__Clostridiales;f__Lachnospiraceae;g__Agathobacter	0.0927375369284055	0.0544660179632874	0.524613644439301	-1
k__Fungi;p__Ascomycota;c__Saccharomycetes;o__Saccharomycetales;f__Incertae sedis	D_0__Bacteria;p__Firmicutes;D_2__Clostridia;D_3__Clostridiales;f__Lachnospiraceae;g__[Eubacterium] ruminantium group	0.0923763852418401	0.0551615817314853	0.524613644439301	-1
k__Fungi;p__Ascomycota;c__Saccharomycetes;o__Saccharomycetales;f__Incertae sedis;g__Debaryomyces	D_0__Bacteria;p__Firmicutes;D_2__Clostridia;D_3__Clostridiales;f__Ruminococcaceae;g__Ruminococcaceae UCG-007	0.093151572362519	0.0536771147733381	0.524613644439301	-1
k__Fungi;p__Ascomycota;c__Sordariomycetes;o__Hypocreales;f__Cordycipitaceae	D_0__Bacteria;p__Actinobacteria;D_2__Coriobacteriia;D_3__Coriobacteriales;f__Coriobacteriales Incertae Sedis	0.0921360632453008	0.0556282877816658	0.527208859812303	-1
k__Fungi;p__Ascomycota;c__Saccharomycetes;o__Saccharomycetales;f__Incertae sedis	D_0__Bacteria;p__Actinobacteria;D_2__Actinobacteria;D_3__Bifidobacteriales;f__Bifidobacteriaceae	0.0901496931659163	0.0596054772658403	0.539310684228013	1
k__Fungi;p__Ascomycota;c__Dothideomycetes;o__Pleosporales;f__Pleosporaceae	D_0__Bacteria;p__Firmicutes;D_2__Clostridia;D_3__Clostridiales;f__Defluviitaleaceae	0.0896576323803354	0.0606241748376525	0.539310684228013	-1
k__Fungi;p__Ascomycota;c__Dothideomycetes;o__Pleosporales;f__Pleosporaceae;g__Alternaria	D_0__Bacteria;p__Firmicutes;D_2__Clostridia;D_3__Clostridiales;f__Defluviitaleaceae	0.0896576323803354	0.0606241748376525	0.539310684228013	-1
k__Fungi;p__Ascomycota;c__Saccharomycetes;o__Saccharomycetales;f__Incertae sedis;g__Debaryomyces	D_0__Bacteria;p__Firmicutes;D_2__Negativicutes;D_3__Selenomonadales;f__Veillonellaceae	0.0899397230037288	0.06003852714679	0.539310684228013	1
k__Fungi;p__Ascomycota;c__Saccharomycetes;o__Saccharomycetales;f__Incertae sedis	D_0__Bacteria;p__Actinobacteria;D_2__Actinobacteria;D_3__Bifidobacteriales;f__Bifidobacteriaceae;g__Bifidobacterium	0.0905833095994194	0.0587188827473335	0.539310684228013	1
k__Fungi;p__Ascomycota;c__Saccharomycetes;o__Saccharomycetales;f__Incertae sedis	D_0__Bacteria;p__Firmicutes;D_2__Bacilli;D_3__Lactobacillales;f__Streptococcaceae;g__Streptococcus	0.0904888793257905	0.0589110772462373	0.539310684228013	1
k__Fungi;p__Ascomycota;c__Dothideomycetes;o__Pleosporales;f__Pleosporaceae	D_0__Bacteria;p__Firmicutes;D_2__Clostridia;D_3__Clostridiales;f__Defluviitaleaceae;g__Defluviitaleaceae UCG-011	0.0896576323803354	0.0606241748376525	0.539310684228013	-1
k__Fungi;p__Ascomycota;c__Dothideomycetes;o__Pleosporales;f__Pleosporaceae;g__Alternaria	D_0__Bacteria;p__Firmicutes;D_2__Clostridia;D_3__Clostridiales;f__Defluviitaleaceae;g__Defluviitaleaceae UCG-011	0.0896576323803354	0.0606241748376525	0.539310684228013	-1
k__Fungi;p__Ascomycota;c__Eurotiomycetes;o__Eurotiales;f__Trichocomaceae	D_0__Bacteria;p__Firmicutes;D_2__Clostridia;D_3__Clostridiales;f__Family XIII;g__Family XIII UCG-001	0.0899307561993991	0.0600570750322051	0.539310684228013	1
k__Fungi;p__Ascomycota;c__Eurotiomycetes;o__Eurotiales;f__Trichocomaceae;g__Penicillium	D_0__Bacteria;p__Firmicutes;D_2__Clostridia;D_3__Clostridiales;f__Family XIII;g__Family XIII UCG-001	0.0899307561993991	0.0600570750322051	0.539310684228013	1
k__Fungi;p__Ascomycota;c__Saccharomycetes;o__Saccharomycetales;f__Saccharomycetaceae	D_0__Bacteria;p__Firmicutes;D_2__Clostridia;D_3__Clostridiales;f__Lachnospiraceae;g__Lachnospiraceae UCG-001	0.0912745182801783	0.0573269355010655	0.539310684228013	-1
k__Fungi;p__Ascomycota;c__Saccharomycetes;o__Saccharomycetales;f__Incertae sedis;g__Candida	D_0__Bacteria;p__Firmicutes;D_2__Clostridia;D_3__Clostridiales;f__Lachnospiraceae;g__Lachnospiraceae UCG-010	0.0899575752338581	0.0600016129959421	0.539310684228013	-1
k__Fungi;p__Ascomycota;c__Saccharomycetes;o__Saccharomycetales;f__Incertae sedis;g__Candida	D_0__Bacteria;p__Firmicutes;D_2__Clostridia;D_3__Clostridiales;f__Lachnospiraceae;g__Tyzzerella 4	0.0902382353175541	0.0594235964664175	0.539310684228013	1
k__Fungi;p__Ascomycota;c__Saccharomycetes;o__Saccharomycetales;f__Saccharomycetaceae	D_0__Bacteria;p__Firmicutes;D_2__Clostridia;D_3__Clostridiales;f__Lachnospiraceae;g__[Eubacterium] fissicatena group	0.0902325075980411	0.0594353490762278	0.539310684228013	1
k__Fungi;p__Ascomycota;c__Dothideomycetes;o__Pleosporales;f__Pleosporaceae	D_0__Bacteria;p__Firmicutes;D_2__Clostridia;D_3__Clostridiales;f__Lachnospiraceae;Other	0.0897306917934414	0.0604720714122482	0.539310684228013	-1
k__Fungi;p__Ascomycota;c__Dothideomycetes;o__Pleosporales;f__Pleosporaceae;g__Alternaria	D_0__Bacteria;p__Firmicutes;D_2__Clostridia;D_3__Clostridiales;f__Lachnospiraceae;Other	0.0897306917934414	0.0604720714122482	0.539310684228013	-1
k__Fungi;p__Ascomycota;c__Dothideomycetes;o__Pleosporales;f__Pleosporaceae	D_0__Bacteria;p__Firmicutes;D_2__Clostridia;D_3__Clostridiales;f__Ruminococcaceae;g__Ruminiclostridium 9	0.0911688939982645	0.0575379523194217	0.539310684228013	-1
k__Fungi;p__Ascomycota;c__Dothideomycetes;o__Pleosporales;f__Pleosporaceae;g__Alternaria	D_0__Bacteria;p__Firmicutes;D_2__Clostridia;D_3__Clostridiales;f__Ruminococcaceae;g__Ruminiclostridium 9	0.0911688939982645	0.0575379523194217	0.539310684228013	-1
k__Fungi;p__Ascomycota;c__Saccharomycetes;o__Saccharomycetales;f__Saccharomycetaceae	D_0__Bacteria;p__Firmicutes;D_2__Clostridia;D_3__Clostridiales;f__Ruminococcaceae;g__Ruminococcaceae UCG-007	0.0896344733870403	0.0606724519756514	0.539310684228013	1
k__Fungi;p__Ascomycota;c__Sordariomycetes;o__Hypocreales;f__Cordycipitaceae	D_0__Bacteria;p__Firmicutes;D_2__Clostridia;D_3__Clostridiales;f__Lachnospiraceae;g__Coprococcus 2	0.0893905413443151	0.0611827705968634	0.542075361639962	-1
k__Fungi;p__Ascomycota;c__Saccharomycetes;o__Saccharomycetales;f__Incertae sedis;g__Candida	D_0__Bacteria;p__Firmicutes;D_2__Clostridia;D_3__Clostridiales;f__Ruminococcaceae;g__[Eubacterium] coprostanoligenes group	0.0891723198316137	0.0616421240455621	0.544372004558211	-1
k__Fungi;p__Ascomycota;c__Saccharomycetes;o__Saccharomycetales;f__Incertae sedis	D_0__Bacteria;p__Firmicutes;D_2__Clostridia;D_3__Clostridiales;f__Ruminococcaceae;g__Ruminiclostridium 6	0.088644771216069	0.0627636736783199	0.55248282331725	-1
k__Fungi;p__Ascomycota;c__Sordariomycetes;o__Hypocreales;f__Cordycipitaceae	D_0__Bacteria;p__Firmicutes;D_2__Clostridia;D_3__Clostridiales;f__Lachnospiraceae;g__GCA-900066575	0.0884740189262196	0.0631300564585773	0.553915334088162	-1
k__Fungi;p__Ascomycota;c__Sordariomycetes;o__Hypocreales;f__Cordycipitaceae	D_0__Bacteria;p__Firmicutes;D_2__Clostridia;D_3__Clostridiales;f__Family XIII;g__Family XIII UCG-001	0.0880524078744155	0.0640418033409011	0.560108376486338	-1
k__Fungi;p__Ascomycota;c__Saccharomycetes;o__Saccharomycetales;f__Incertae sedis;g__Debaryomyces	D_0__Bacteria;p__Firmicutes;D_2__Clostridia;D_3__Clostridiales;f__Lachnospiraceae;g__GCA-900066575	0.0876255727964752	0.064975190331914	0.566450377252584	-1
k__Fungi;p__Ascomycota;c__Sordariomycetes;o__Hypocreales;f__Cordycipitaceae	D_0__Bacteria;p__Firmicutes;D_2__Clostridia;D_3__Clostridiales;f__Lachnospiraceae;g__[Eubacterium] oxidoreducens group	0.0874072119387908	0.0654567384457012	0.56882533090194	-1
k__Fungi;p__Ascomycota;c__Sordariomycetes;o__Hypocreales;f__Nectriaceae	D_0__Bacteria;p__Firmicutes;D_2__Clostridia;D_3__Clostridiales;f__Family XIII;g__Family XIII AD3011 group	0.086983987349184	0.0663979056467995	0.573340645585062	-1
k__Fungi;p__Ascomycota;c__Sordariomycetes;o__Hypocreales;f__Nectriaceae;g__Fusarium	D_0__Bacteria;p__Firmicutes;D_2__Clostridia;D_3__Clostridiales;f__Family XIII;g__Family XIII AD3011 group	0.086983987349184	0.0663979056467995	0.573340645585062	-1
k__Fungi;p__Ascomycota;c__Saccharomycetes;o__Saccharomycetales;f__Incertae sedis	D_0__Bacteria;p__Firmicutes;D_2__Bacilli;D_3__Lactobacillales;f__Streptococcaceae	0.0864067143682238	0.0676984104442916	0.579055586190167	1
k__Fungi;p__Basidiomycota;c__Tremellomycetes;o__Filobasidiales;f__Filobasidiaceae	D_0__Bacteria;p__Firmicutes;D_2__Clostridia;D_3__Clostridiales;f__Ruminococcaceae;g__Ruminococcaceae UCG-004	0.0864637064988969	0.0675691516342144	0.579055586190167	1
k__Fungi;p__Basidiomycota;c__Tremellomycetes;o__Filobasidiales;f__Filobasidiaceae;g__Filobasidium	D_0__Bacteria;p__Firmicutes;D_2__Clostridia;D_3__Clostridiales;f__Ruminococcaceae;g__Ruminococcaceae UCG-004	0.0864637064988969	0.0675691516342144	0.579055586190167	1
k__Fungi;p__Ascomycota;c__Saccharomycetes;o__Saccharomycetales;f__Saccharomycetaceae	D_0__Bacteria;p__Proteobacteria;D_2__Alphaproteobacteria;D_3__Rhodospirillales;f__uncultured	0.0862097302996885	0.0681466365678424	0.57924641082666	1
k__Fungi;p__Ascomycota;c__Saccharomycetes;o__Saccharomycetales;f__Incertae sedis;g__Debaryomyces	D_0__Bacteria;p__Firmicutes;D_2__Clostridia;D_3__Clostridiales;f__Christensenellaceae;g__uncultured	0.0862716242279663	0.068005555538563	0.57924641082666	-1
k__Fungi;p__Ascomycota;c__Saccharomycetes;o__Saccharomycetales;f__Incertae sedis;g__Debaryomyces	D_0__Bacteria;p__Firmicutes;D_2__Clostridia;D_3__Clostridiales;f__Lachnospiraceae;g__Marvinbryantia	0.0858750950880451	0.0689133001257702	0.583938244056371	1
k__Fungi;p__Ascomycota;c__Dothideomycetes;o__Pleosporales;f__Pleosporaceae	D_0__Bacteria;p__Firmicutes;D_2__Clostridia;D_3__Clostridiales;f__Lachnospiraceae;g__[Ruminococcus] torques group	0.0851099651919192	0.0706910840565287	0.593456014301722	-1
k__Fungi;p__Ascomycota;c__Dothideomycetes;o__Pleosporales;f__Pleosporaceae;g__Alternaria	D_0__Bacteria;p__Firmicutes;D_2__Clostridia;D_3__Clostridiales;f__Lachnospiraceae;g__[Ruminococcus] torques group	0.0851099651919192	0.0706910840565287	0.593456014301722	-1
k__Fungi;p__Ascomycota;c__Sordariomycetes;o__Hypocreales;f__Cordycipitaceae	D_0__Bacteria;p__Firmicutes;D_2__Clostridia;D_3__Clostridiales;f__Ruminococcaceae;g__Candidatus Soleaferrea	0.085209660179453	0.0704574749435545	0.593456014301722	-1
k__Fungi;p__Ascomycota;c__Saccharomycetes;o__Saccharomycetales;f__Incertae sedis;g__Candida	D_0__Bacteria;p__Firmicutes;D_2__Clostridia;D_3__Clostridiales;f__Lachnospiraceae;g__Lachnospiraceae NC2004 group	0.0848017036773178	0.0714171614182521	0.597706704792756	-1
k__Fungi;p__Ascomycota;c__Sordariomycetes;o__Hypocreales;f__Nectriaceae	D_0__Bacteria;p__Firmicutes;D_2__Erysipelotrichia;D_3__Erysipelotrichales;f__Erysipelotrichaceae;g__Turicibacter	0.0840858641200798	0.0731251989037826	0.608258535224124	-1
k__Fungi;p__Ascomycota;c__Sordariomycetes;o__Hypocreales;f__Nectriaceae;g__Fusarium	D_0__Bacteria;p__Firmicutes;D_2__Erysipelotrichia;D_3__Erysipelotrichales;f__Erysipelotrichaceae;g__Turicibacter	0.0840858641200798	0.0731251989037826	0.608258535224124	-1
k__Fungi;p__Ascomycota;c__Sordariomycetes;o__Hypocreales;f__Nectriaceae	D_0__Bacteria;p__Actinobacteria;D_2__Coriobacteriia;D_3__Coriobacteriales;f__Coriobacteriaceae	0.0824383978565165	0.0771741102809228	0.624742797512232	-1
k__Fungi;p__Ascomycota;c__Sordariomycetes;o__Hypocreales;f__Nectriaceae;g__Fusarium	D_0__Bacteria;p__Actinobacteria;D_2__Coriobacteriia;D_3__Coriobacteriales;f__Coriobacteriaceae	0.0824383978565165	0.0771741102809228	0.624742797512232	-1
k__Fungi;p__Ascomycota;c__Sordariomycetes;o__Hypocreales;f__Nectriaceae	D_0__Bacteria;p__Actinobacteria;D_2__Coriobacteriia;D_3__Coriobacteriales;f__Coriobacteriaceae;g__Collinsella	0.0824383978565165	0.0771741102809228	0.624742797512232	-1
k__Fungi;p__Ascomycota;c__Sordariomycetes;o__Hypocreales;f__Nectriaceae;g__Fusarium	D_0__Bacteria;p__Actinobacteria;D_2__Coriobacteriia;D_3__Coriobacteriales;f__Coriobacteriaceae;g__Collinsella	0.0824383978565165	0.0771741102809228	0.624742797512232	-1
k__Fungi;p__Ascomycota;c__Dothideomycetes;o__Pleosporales;f__Pleosporaceae	D_0__Bacteria;p__Firmicutes;D_2__Clostridia;D_3__Clostridiales;f__Peptostreptococcaceae;Other	0.0827565444013319	0.0763792900240459	0.624742797512232	-1
k__Fungi;p__Ascomycota;c__Dothideomycetes;o__Pleosporales;f__Pleosporaceae;g__Alternaria	D_0__Bacteria;p__Firmicutes;D_2__Clostridia;D_3__Clostridiales;f__Peptostreptococcaceae;Other	0.0827565444013319	0.0763792900240459	0.624742797512232	-1
k__Fungi;p__Ascomycota;c__Saccharomycetes;o__Saccharomycetales;f__Incertae sedis;g__Candida	D_0__Bacteria;p__Firmicutes;D_2__Clostridia;D_3__Clostridiales;f__Ruminococcaceae;g__Ruminococcaceae UCG-005	0.0826892256304807	0.0765469523698781	0.624742797512232	-1
k__Fungi;p__Ascomycota;c__Dothideomycetes;o__Capnodiales;f__Davidiellaceae	D_0__Bacteria;p__Firmicutes;D_2__Clostridia;D_3__Clostridiales;f__Ruminococcaceae;g__Subdoligranulum	0.0824794369668618	0.0770712330855543	0.624742797512232	-1
k__Fungi;p__Ascomycota;c__Dothideomycetes;o__Capnodiales;f__Davidiellaceae;g__Davidiella	D_0__Bacteria;p__Firmicutes;D_2__Clostridia;D_3__Clostridiales;f__Ruminococcaceae;g__Subdoligranulum	0.0824794369668618	0.0770712330855543	0.624742797512232	-1
k__Fungi;p__Ascomycota;c__Saccharomycetes;o__Saccharomycetales;f__Incertae sedis	D_0__Bacteria;p__Firmicutes;D_2__Clostridia;D_3__Clostridiales;f__Lachnospiraceae;g__Lachnoclostridium	0.0822807691419495	0.0775702206015035	0.626086053519554	1
k__Fungi;p__Ascomycota;c__Sordariomycetes;o__Hypocreales;f__Nectriaceae	D_0__Bacteria;p__Proteobacteria;D_2__Gammaproteobacteria;D_3__Betaproteobacteriales;f__Burkholderiaceae	0.0820241202729903	0.0782184453776782	0.627593426039188	1
k__Fungi;p__Ascomycota;c__Sordariomycetes;o__Hypocreales;f__Nectriaceae;g__Fusarium	D_0__Bacteria;p__Proteobacteria;D_2__Gammaproteobacteria;D_3__Betaproteobacteriales;f__Burkholderiaceae	0.0820241202729903	0.0782184453776782	0.627593426039188	1
k__Fungi;p__Ascomycota;c__Saccharomycetes;o__Saccharomycetales;f__Incertae sedis	D_0__Bacteria;p__Firmicutes;D_2__Clostridia;D_3__Clostridiales;f__Ruminococcaceae;g__Ruminiclostridium 1	0.0816277664443788	0.0792275457288593	0.633820365830874	-1
k__Fungi;p__Ascomycota;c__Saccharomycetes;o__Saccharomycetales;f__Incertae sedis;g__Debaryomyces	D_0__Bacteria;p__Firmicutes;D_2__Clostridia;D_3__Clostridiales;f__Peptostreptococcaceae;g__Romboutsia	0.0815009246208224	0.0795525423083295	0.634554003163215	-1
k__Fungi;p__Ascomycota;c__Sordariomycetes;o__Hypocreales;f__Nectriaceae	D_0__Bacteria;p__Firmicutes;D_2__Clostridia;D_3__Clostridiales;f__Lachnospiraceae;g__GCA-900066575	0.0808559155433514	0.0812207419540854	0.643936602051714	-1
k__Fungi;p__Ascomycota;c__Sordariomycetes;o__Hypocreales;f__Nectriaceae;g__Fusarium	D_0__Bacteria;p__Firmicutes;D_2__Clostridia;D_3__Clostridiales;f__Lachnospiraceae;g__GCA-900066575	0.0808559155433514	0.0812207419540854	0.643936602051714	-1
k__Fungi;p__Ascomycota;c__Saccharomycetes;o__Saccharomycetales;f__Saccharomycetaceae	D_0__Bacteria;p__Firmicutes;D_2__Clostridia;D_3__Clostridiales;f__Peptostreptococcaceae;g__Romboutsia	0.0807722488055481	0.0814390408477168	0.643936602051714	1
k__Fungi;p__Ascomycota;c__Sordariomycetes;o__Hypocreales;f__Nectriaceae	D_0__Bacteria;p__Firmicutes;D_2__Clostridia;D_3__Clostridiales;f__Lachnospiraceae;g__Lachnospiraceae UCG-008	0.0805719295803252	0.0819634919470182	0.644337277733785	-1
k__Fungi;p__Ascomycota;c__Sordariomycetes;o__Hypocreales;f__Nectriaceae;g__Fusarium	D_0__Bacteria;p__Firmicutes;D_2__Clostridia;D_3__Clostridiales;f__Lachnospiraceae;g__Lachnospiraceae UCG-008	0.0805719295803252	0.0819634919470182	0.644337277733785	-1
k__Fungi;p__Ascomycota;c__Saccharomycetes;o__Saccharomycetales;f__Incertae sedis;g__Candida	D_0__Bacteria;p__Firmicutes;D_2__Clostridia;D_3__Clostridiales;f__Ruminococcaceae;g__Ruminococcaceae UCG-002	0.0802657525887633	0.0827699735945018	0.648802098492925	-1
k__Fungi;p__Ascomycota;c__Sordariomycetes;o__Hypocreales;f__Cordycipitaceae	D_0__Bacteria;p__Firmicutes;D_2__Clostridia;D_3__Clostridiales;f__Lachnospiraceae;g__Lachnospiraceae NC2004 group	0.0800577618266644	0.0833212081281336	0.65124622444978	-1
k__Fungi;p__Ascomycota;c__Saccharomycetes;o__Saccharomycetales;f__Incertae sedis;g__Debaryomyces	D_0__Bacteria;p__Firmicutes;D_2__Clostridia;D_3__Clostridiales;f__Lachnospiraceae;g__Fusicatenibacter	0.079693203001369	0.084294009449547	0.656961907457788	-1
k__Fungi;p__Ascomycota;c__Sordariomycetes;o__Hypocreales;f__Cordycipitaceae	D_0__Bacteria;p__Firmicutes;D_2__Clostridia;D_3__Clostridiales;f__Lachnospiraceae;g__Fusicatenibacter	0.0790814528358212	0.085945441562048	0.663033102386282	-1
k__Fungi;p__Ascomycota;c__Dothideomycetes;o__Capnodiales;f__Davidiellaceae	D_0__Bacteria;p__Firmicutes;D_2__Clostridia;D_3__Clostridiales;f__Lachnospiraceae;g__Lachnospira	0.0790256731965821	0.0860972098690437	0.663033102386282	-1
k__Fungi;p__Ascomycota;c__Dothideomycetes;o__Capnodiales;f__Davidiellaceae;g__Davidiella	D_0__Bacteria;p__Firmicutes;D_2__Clostridia;D_3__Clostridiales;f__Lachnospiraceae;g__Lachnospira	0.0790256731965821	0.0860972098690437	0.663033102386282	-1
k__Fungi;p__Ascomycota;c__Eurotiomycetes;o__Eurotiales;f__Trichocomaceae	D_0__Bacteria;p__Firmicutes;D_2__Clostridia;D_3__Clostridiales;f__Ruminococcaceae;g__Oscillibacter	0.0787410128653898	0.0868748372087714	0.663033102386282	-1
k__Fungi;p__Ascomycota;c__Eurotiomycetes;o__Eurotiales;f__Trichocomaceae;g__Penicillium	D_0__Bacteria;p__Firmicutes;D_2__Clostridia;D_3__Clostridiales;f__Ruminococcaceae;g__Oscillibacter	0.0787410128653898	0.0868748372087714	0.663033102386282	-1
k__Fungi;p__Ascomycota;c__Saccharomycetes;o__Saccharomycetales;f__Saccharomycetaceae	D_0__Bacteria;p__Firmicutes;D_2__Clostridia;D_3__Clostridiales;f__Ruminococcaceae;g__Ruminococcaceae UCG-005	0.0786869565879601	0.0870230946881996	0.663033102386282	1
k__Fungi;p__Ascomycota;c__Saccharomycetes;o__Saccharomycetales;f__Saccharomycetaceae;g__Saccharomyces	D_0__Bacteria;p__Firmicutes;D_2__Clostridia;D_3__Clostridiales;f__Ruminococcaceae;g__Ruminococcaceae UCG-005	0.0788002231224991	0.0867126597148915	0.663033102386282	1
k__Fungi;p__Ascomycota;c__Saccharomycetes;o__Saccharomycetales;f__Saccharomycetaceae;g__Saccharomyces	D_0__Bacteria;p__Firmicutes;D_2__Negativicutes;D_3__Selenomonadales;f__Veillonellaceae;g__Allisonella	0.0791860399488485	0.0856614122275212	0.663033102386282	1
k__Fungi;p__Ascomycota;c__Sordariomycetes;o__Hypocreales;f__Nectriaceae	D_0__Bacteria;p__Firmicutes;D_2__Clostridia;D_3__Clostridiales;f__Christensenellaceae;g__Catabacter	0.0783120807339075	0.0880564250910609	0.664556483798097	-1
k__Fungi;p__Ascomycota;c__Sordariomycetes;o__Hypocreales;f__Nectriaceae;g__Fusarium	D_0__Bacteria;p__Firmicutes;D_2__Clostridia;D_3__Clostridiales;f__Christensenellaceae;g__Catabacter	0.0783120807339075	0.0880564250910609	0.664556483798097	-1
k__Fungi;p__Ascomycota;c__Dothideomycetes;o__Pleosporales;f__Pleosporaceae	D_0__Bacteria;p__Firmicutes;D_2__Negativicutes;D_3__Selenomonadales;f__Veillonellaceae;g__Veillonella	0.0782601346483744	0.0882003274452621	0.664556483798097	1
k__Fungi;p__Ascomycota;c__Dothideomycetes;o__Pleosporales;f__Pleosporaceae;g__Alternaria	D_0__Bacteria;p__Firmicutes;D_2__Negativicutes;D_3__Selenomonadales;f__Veillonellaceae;g__Veillonella	0.0782601346483744	0.0882003274452621	0.664556483798097	1
k__Fungi;p__Ascomycota;c__Dothideomycetes;o__Capnodiales;f__Davidiellaceae	D_0__Bacteria;p__Bacteroidetes;D_2__Bacteroidia;D_3__Bacteroidales;f__Tannerellaceae	0.077300049334225	0.0908914648635544	0.668175093050994	-1
k__Fungi;p__Ascomycota;c__Dothideomycetes;o__Capnodiales;f__Davidiellaceae;g__Davidiella	D_0__Bacteria;p__Bacteroidetes;D_2__Bacteroidia;D_3__Bacteroidales;f__Tannerellaceae	0.077300049334225	0.0908914648635544	0.668175093050994	-1
k__Fungi;p__Ascomycota;c__Sordariomycetes;o__Hypocreales;f__Cordycipitaceae	D_0__Bacteria;p__Firmicutes;D_2__Clostridia;D_3__Clostridiales;f__Clostridiales vadinBB60 group	0.0774822128833928	0.09037625208627	0.668175093050994	1
k__Fungi;p__Ascomycota;c__Saccharomycetes;o__Saccharomycetales;f__Incertae sedis;g__Debaryomyces	D_0__Bacteria;p__Actinobacteria;D_2__Coriobacteriia;D_3__Coriobacteriales;f__Eggerthellaceae;g__Senegalimassilia	0.077532339778939	0.0902348575963425	0.668175093050994	-1
k__Fungi;p__Ascomycota;c__Dothideomycetes;o__Capnodiales;f__Davidiellaceae	D_0__Bacteria;p__Bacteroidetes;D_2__Bacteroidia;D_3__Bacteroidales;f__Tannerellaceae;g__Parabacteroides	0.077300049334225	0.0908914648635544	0.668175093050994	-1
k__Fungi;p__Ascomycota;c__Dothideomycetes;o__Capnodiales;f__Davidiellaceae;g__Davidiella	D_0__Bacteria;p__Bacteroidetes;D_2__Bacteroidia;D_3__Bacteroidales;f__Tannerellaceae;g__Parabacteroides	0.077300049334225	0.0908914648635544	0.668175093050994	-1
k__Fungi;p__Ascomycota;c__Sordariomycetes;o__Hypocreales;f__Cordycipitaceae	D_0__Bacteria;p__Firmicutes;D_2__Clostridia;D_3__Clostridiales;f__Clostridiales vadinBB60 group;g__uncultured bacterium	0.0776778622208337	0.089825304209965	0.668175093050994	1
k__Fungi;p__Ascomycota;c__Saccharomycetes;o__Saccharomycetales;f__Saccharomycetaceae;g__Saccharomyces	D_0__Bacteria;p__Firmicutes;D_2__Clostridia;D_3__Clostridiales;f__Lachnospiraceae;g__Eisenbergiella	0.0774935559661456	0.0903442419793651	0.668175093050994	1
k__Fungi;p__Ascomycota;c__Saccharomycetes;o__Saccharomycetales;f__Incertae sedis	D_0__Bacteria;p__Firmicutes;D_2__Clostridia;D_3__Clostridiales;f__Lachnospiraceae;g__Lachnospira	0.0777021368720055	0.0897571204591878	0.668175093050994	-1
k__Fungi;p__Ascomycota;c__Saccharomycetes;o__Saccharomycetales;f__Saccharomycetaceae	D_0__Bacteria;p__Proteobacteria;D_2__Deltaproteobacteria;D_3__Desulfovibrionales;f__Desulfovibrionaceae	0.0766786725172868	0.092665214179967	0.677552103681479	1
k__Fungi;p__Ascomycota;c__Saccharomycetes;o__Saccharomycetales;f__Saccharomycetaceae	D_0__Bacteria;p__Proteobacteria;D_2__Deltaproteobacteria;D_3__Desulfovibrionales;f__Desulfovibrionaceae;g__Desulfovibrio	0.0766786725172868	0.092665214179967	0.677552103681479	1
k__Fungi;p__Ascomycota;c__Dothideomycetes;o__Pleosporales;f__Pleosporaceae	D_0__Bacteria;p__Firmicutes;D_2__Clostridia;D_3__Clostridiales;f__Lachnospiraceae;g__Anaerostipes	0.076152581260434	0.094186771809141	0.681351115215063	-1
k__Fungi;p__Ascomycota;c__Dothideomycetes;o__Pleosporales;f__Pleosporaceae;g__Alternaria	D_0__Bacteria;p__Firmicutes;D_2__Clostridia;D_3__Clostridiales;f__Lachnospiraceae;g__Anaerostipes	0.076152581260434	0.094186771809141	0.681351115215063	-1
k__Fungi;p__Ascomycota;c__Saccharomycetes;o__Saccharomycetales;f__Incertae sedis;g__Debaryomyces	D_0__Bacteria;p__Firmicutes;D_2__Clostridia;D_3__Clostridiales;f__Lachnospiraceae;g__Shuttleworthia	0.0763703680062285	0.0935546809730559	0.681351115215063	-1
k__Fungi;p__Ascomycota;c__Sordariomycetes;o__Hypocreales;f__Cordycipitaceae	D_0__Bacteria;p__Firmicutes;D_2__Erysipelotrichia;D_3__Erysipelotrichales;f__Erysipelotrichaceae;g__Holdemanella	0.0762103803090652	0.0940187146738747	0.681351115215063	-1
k__Fungi;p__Ascomycota;c__Dothideomycetes;o__Capnodiales;f__Davidiellaceae	D_0__Bacteria;p__Actinobacteria;D_2__Actinobacteria;D_3__Propionibacteriales;f__Propionibacteriaceae	0.075424662941229	0.0963221785632737	0.682460569469249	1
k__Fungi;p__Ascomycota;c__Dothideomycetes;o__Capnodiales;f__Davidiellaceae;g__Davidiella	D_0__Bacteria;p__Actinobacteria;D_2__Actinobacteria;D_3__Propionibacteriales;f__Propionibacteriaceae	0.075424662941229	0.0963221785632737	0.682460569469249	1
k__Fungi;p__Ascomycota;c__Saccharomycetes;o__Saccharomycetales;f__Incertae sedis	D_0__Bacteria;p__Proteobacteria;D_2__Deltaproteobacteria;D_3__Desulfovibrionales;f__Desulfovibrionaceae	0.0754337538765883	0.0962952930713594	0.682460569469249	-1
k__Fungi;p__Ascomycota;c__Dothideomycetes;o__Capnodiales;f__Davidiellaceae	D_0__Bacteria;p__Actinobacteria;D_2__Actinobacteria;D_3__Propionibacteriales;f__Propionibacteriaceae;g__Propionibacterium	0.075424662941229	0.0963221785632737	0.682460569469249	1
k__Fungi;p__Ascomycota;c__Dothideomycetes;o__Capnodiales;f__Davidiellaceae;g__Davidiella	D_0__Bacteria;p__Actinobacteria;D_2__Actinobacteria;D_3__Propionibacteriales;f__Propionibacteriaceae;g__Propionibacterium	0.075424662941229	0.0963221785632737	0.682460569469249	1
k__Fungi;p__Ascomycota;c__Saccharomycetes;o__Saccharomycetales;f__Saccharomycetaceae	D_0__Bacteria;p__Actinobacteria;D_2__Coriobacteriia;D_3__Coriobacteriales;f__Eggerthellaceae;g__Eggerthella	0.0759190736424826	0.0948679658959137	0.682460569469249	-1
k__Fungi;p__Ascomycota;c__Sordariomycetes;o__Hypocreales;f__Nectriaceae	D_0__Bacteria;p__Firmicutes;D_2__Clostridia;D_3__Clostridiales;f__Peptococcaceae;g__uncultured	0.0751885073705513	0.0970225084388597	0.682460569469249	1
k__Fungi;p__Ascomycota;c__Sordariomycetes;o__Hypocreales;f__Nectriaceae;g__Fusarium	D_0__Bacteria;p__Firmicutes;D_2__Clostridia;D_3__Clostridiales;f__Peptococcaceae;g__uncultured	0.0751885073705513	0.0970225084388597	0.682460569469249	1
k__Fungi;p__Ascomycota;c__Dothideomycetes;o__Pleosporales;f__Pleosporaceae	D_0__Bacteria;p__Firmicutes;D_2__Clostridia;D_3__Clostridiales;f__Ruminococcaceae;g__Ruminococcaceae UCG-009	0.075162423639279	0.0971000883766909	0.682460569469249	-1
k__Fungi;p__Ascomycota;c__Dothideomycetes;o__Pleosporales;f__Pleosporaceae;g__Alternaria	D_0__Bacteria;p__Firmicutes;D_2__Clostridia;D_3__Clostridiales;f__Ruminococcaceae;g__Ruminococcaceae UCG-009	0.075162423639279	0.0971000883766909	0.682460569469249	-1
k__Fungi;p__Ascomycota;c__Saccharomycetes;o__Saccharomycetales;f__Incertae sedis	D_0__Bacteria;p__Proteobacteria;D_2__Deltaproteobacteria;D_3__Desulfovibrionales;f__Desulfovibrionaceae;g__Desulfovibrio	0.0754337538765883	0.0962952930713594	0.682460569469249	-1
k__Fungi;p__Ascomycota;c__Dothideomycetes;o__Pleosporales;f__Pleosporaceae	D_0__Bacteria;p__Firmicutes;D_2__Erysipelotrichia;D_3__Erysipelotrichales;f__Erysipelotrichaceae	0.0748183611101398	0.0981276643958653	0.683581277261428	-1
k__Fungi;p__Ascomycota;c__Dothideomycetes;o__Pleosporales;f__Pleosporaceae;g__Alternaria	D_0__Bacteria;p__Firmicutes;D_2__Erysipelotrichia;D_3__Erysipelotrichales;f__Erysipelotrichaceae	0.0748183611101398	0.0981276643958653	0.683581277261428	-1
k__Fungi;p__Ascomycota;c__Dothideomycetes;o__Pleosporales;f__Pleosporaceae	D_0__Bacteria;p__Firmicutes;D_2__Clostridia;D_3__Clostridiales;f__Lachnospiraceae;g__[Eubacterium] fissicatena group	0.0746889773506855	0.0985161252523823	0.683581277261428	-1
k__Fungi;p__Ascomycota;c__Dothideomycetes;o__Pleosporales;f__Pleosporaceae;g__Alternaria	D_0__Bacteria;p__Firmicutes;D_2__Clostridia;D_3__Clostridiales;f__Lachnospiraceae;g__[Eubacterium] fissicatena group	0.0746889773506855	0.0985161252523823	0.683581277261428	-1
k__Fungi;p__Ascomycota;c__Saccharomycetes;o__Saccharomycetales;f__Incertae sedis;g__Debaryomyces	D_0__Bacteria;p__Firmicutes;D_2__Clostridia;D_3__Clostridiales;f__Ruminococcaceae;g__Oscillospira	0.0749568349593953	0.097713149774139	0.683581277261428	-1
k__Fungi;p__Ascomycota;c__Saccharomycetes;o__Saccharomycetales;f__Incertae sedis;g__Candida	D_0__Bacteria;p__Firmicutes;D_2__Clostridia;D_3__Clostridiales;f__Lachnospiraceae;g__Shuttleworthia	0.0744916999872333	0.09911058363873	0.685956202283322	1
k__Fungi;p__Ascomycota;c__Saccharomycetes;o__Saccharomycetales;f__Incertae sedis;g__Debaryomyces	D_0__Bacteria;p__Firmicutes;D_2__Clostridia;D_3__Clostridiales;f__Family XIII;g__Family XIII UCG-001	0.0743679460466385	0.0994848227878216	0.686798776606281	1
k__Fungi;p__Ascomycota;c__Dothideomycetes;o__Pleosporales;f__Pleosporaceae	D_0__Bacteria;p__Firmicutes;D_2__Clostridia;D_3__Clostridiales;f__Lachnospiraceae;g__Blautia	0.0739300367371687	0.100817336768417	0.692482717197209	-1
k__Fungi;p__Ascomycota;c__Dothideomycetes;o__Pleosporales;f__Pleosporaceae;g__Alternaria	D_0__Bacteria;p__Firmicutes;D_2__Clostridia;D_3__Clostridiales;f__Lachnospiraceae;g__Blautia	0.0739300367371687	0.100817336768417	0.692482717197209	-1
k__Fungi;p__Ascomycota;c__Saccharomycetes;o__Saccharomycetales;f__Saccharomycetaceae	D_0__Bacteria;p__Firmicutes;D_2__Negativicutes;D_3__Selenomonadales;f__Veillonellaceae;g__Allisonella	0.0737648183192169	0.101323429310419	0.694205863285494	1
k__Fungi;p__Ascomycota;c__Dothideomycetes;o__Capnodiales;f__Davidiellaceae	D_0__Bacteria;p__Firmicutes;D_2__Clostridia;D_3__Clostridiales;f__Ruminococcaceae;g__Ruminococcaceae UCG-010	0.0730856037163097	0.103423328197591	0.705041234830696	-1
k__Fungi;p__Ascomycota;c__Dothideomycetes;o__Capnodiales;f__Davidiellaceae;g__Davidiella	D_0__Bacteria;p__Firmicutes;D_2__Clostridia;D_3__Clostridiales;f__Ruminococcaceae;g__Ruminococcaceae UCG-010	0.0730856037163097	0.103423328197591	0.705041234830696	-1
k__Fungi;p__Ascomycota;c__Saccharomycetes;o__Saccharomycetales;f__Incertae sedis;g__Debaryomyces	D_0__Bacteria;p__Firmicutes;D_2__Clostridia;D_3__Clostridiales;f__Ruminococcaceae;g__Anaerotruncus	0.0728924426595488	0.10402621614674	0.707378269797829	-1
k__Fungi;p__Ascomycota;c__Saccharomycetes;o__Saccharomycetales;f__Incertae sedis	D_0__Bacteria;p__Tenericutes;D_2__Mollicutes;D_3__Mollicutes RF39;f__uncultured bacterium	0.0720877665934361	0.106565025026259	0.719247811591623	-1
k__Fungi;p__Ascomycota;c__Saccharomycetes;o__Saccharomycetales;f__Saccharomycetaceae;g__Saccharomyces	D_0__Bacteria;p__Firmicutes;D_2__Clostridia;D_3__Clostridiales;f__Ruminococcaceae;g__Ruminiclostridium	0.0721155120500365	0.106476751976541	0.719247811591623	1
k__Fungi;p__Ascomycota;c__Saccharomycetes;o__Saccharomycetales;f__Incertae sedis	D_0__Bacteria;p__Tenericutes;D_2__Mollicutes;D_3__Mollicutes RF39;f__uncultured bacterium;g__uncultured bacterium	0.0720877665934361	0.106565025026259	0.719247811591623	-1
k__Fungi;p__Ascomycota;c__Dothideomycetes;o__Pleosporales;f__Pleosporaceae	D_0__Bacteria;p__Firmicutes;D_2__Clostridia;D_3__Clostridiales;f__Lachnospiraceae;g__Lachnospiraceae UCG-006	0.0717735688319817	0.107568324735512	0.720654786405401	-1
k__Fungi;p__Ascomycota;c__Dothideomycetes;o__Pleosporales;f__Pleosporaceae;g__Alternaria	D_0__Bacteria;p__Firmicutes;D_2__Clostridia;D_3__Clostridiales;f__Lachnospiraceae;g__Lachnospiraceae UCG-006	0.0717735688319817	0.107568324735512	0.720654786405401	-1
k__Fungi;p__Ascomycota;c__Saccharomycetes;o__Saccharomycetales;f__Saccharomycetaceae	D_0__Bacteria;p__Firmicutes;D_2__Clostridia;D_3__Clostridiales;f__Lachnospiraceae;g__Lachnospiraceae UCG-008	0.0718316544138611	0.107382336760571	0.720654786405401	1
k__Fungi;p__Ascomycota;c__Dothideomycetes;o__Pleosporales;f__Pleosporaceae	D_0__Bacteria;p__Proteobacteria;D_2__Deltaproteobacteria;D_3__Desulfovibrionales;f__Desulfovibrionaceae	0.0706555217304135	0.111193371044538	0.732314695499137	-1
k__Fungi;p__Ascomycota;c__Dothideomycetes;o__Pleosporales;f__Pleosporaceae;g__Alternaria	D_0__Bacteria;p__Proteobacteria;D_2__Deltaproteobacteria;D_3__Desulfovibrionales;f__Desulfovibrionaceae	0.0706555217304135	0.111193371044538	0.732314695499137	-1
k__Fungi;p__Ascomycota;c__Saccharomycetes;o__Saccharomycetales;f__Saccharomycetaceae;g__Saccharomyces	D_0__Bacteria;p__Actinobacteria;D_2__Coriobacteriia;D_3__Coriobacteriales;f__Eggerthellaceae;g__Eggerthella	0.0710123878568429	0.110026969018405	0.732314695499137	-1
k__Fungi;p__Ascomycota;c__Dothideomycetes;o__Pleosporales;f__Pleosporaceae	D_0__Bacteria;p__Firmicutes;D_2__Erysipelotrichia;D_3__Erysipelotrichales;f__Erysipelotrichaceae;g__Turicibacter	0.0707259850188416	0.110962369583431	0.732314695499137	-1
k__Fungi;p__Ascomycota;c__Dothideomycetes;o__Pleosporales;f__Pleosporaceae;g__Alternaria	D_0__Bacteria;p__Firmicutes;D_2__Erysipelotrichia;D_3__Erysipelotrichales;f__Erysipelotrichaceae;g__Turicibacter	0.0707259850188416	0.110962369583431	0.732314695499137	-1
k__Fungi;p__Ascomycota;c__Dothideomycetes;o__Pleosporales;f__Pleosporaceae	D_0__Bacteria;p__Proteobacteria;D_2__Deltaproteobacteria;D_3__Desulfovibrionales;f__Desulfovibrionaceae;g__Desulfovibrio	0.0706555217304135	0.111193371044538	0.732314695499137	-1
k__Fungi;p__Ascomycota;c__Dothideomycetes;o__Pleosporales;f__Pleosporaceae;g__Alternaria	D_0__Bacteria;p__Proteobacteria;D_2__Deltaproteobacteria;D_3__Desulfovibrionales;f__Desulfovibrionaceae;g__Desulfovibrio	0.0706555217304135	0.111193371044538	0.732314695499137	-1
k__Fungi;p__Ascomycota;c__Sordariomycetes;o__Hypocreales;f__Nectriaceae	D_0__Bacteria;p__Firmicutes;D_2__Clostridia;D_3__Clostridiales;f__Lachnospiraceae;g__[Eubacterium] fissicatena group	0.0704564943483127	0.111847697055436	0.733074062628397	-1
k__Fungi;p__Ascomycota;c__Sordariomycetes;o__Hypocreales;f__Nectriaceae;g__Fusarium	D_0__Bacteria;p__Firmicutes;D_2__Clostridia;D_3__Clostridiales;f__Lachnospiraceae;g__[Eubacterium] fissicatena group	0.0704564943483127	0.111847697055436	0.733074062628397	-1
k__Fungi;p__Ascomycota;c__Sordariomycetes;o__Hypocreales;f__Nectriaceae	D_0__Bacteria;p__Firmicutes;D_2__Clostridia;D_3__Clostridiales;f__Lachnospiraceae;g__Coprococcus 3	0.0695897033224361	0.114729316636208	0.746563974283456	-1
k__Fungi;p__Ascomycota;c__Sordariomycetes;o__Hypocreales;f__Nectriaceae;g__Fusarium	D_0__Bacteria;p__Firmicutes;D_2__Clostridia;D_3__Clostridiales;f__Lachnospiraceae;g__Coprococcus 3	0.0695897033224361	0.114729316636208	0.746563974283456	-1
k__Fungi;p__Ascomycota;c__Saccharomycetes;o__Saccharomycetales;f__Saccharomycetaceae;g__Saccharomyces	D_0__Bacteria;p__Firmicutes;D_2__Clostridia;D_3__Clostridiales;f__Ruminococcaceae;g__Ruminococcaceae UCG-007	0.0697424622526689	0.114217695699665	0.746563974283456	1
k__Fungi;p__Ascomycota;c__Sordariomycetes;o__Hypocreales;f__Nectriaceae	D_0__Bacteria;p__Actinobacteria;D_2__Coriobacteriia;D_3__Coriobacteriales;f__Coriobacteriales Incertae Sedis	0.0693389287466197	0.115572725974572	0.748470987263896	-1
k__Fungi;p__Ascomycota;c__Sordariomycetes;o__Hypocreales;f__Nectriaceae;g__Fusarium	D_0__Bacteria;p__Actinobacteria;D_2__Coriobacteriia;D_3__Coriobacteriales;f__Coriobacteriales Incertae Sedis	0.0693389287466197	0.115572725974572	0.748470987263896	-1
k__Fungi;p__Ascomycota;c__Saccharomycetes;o__Saccharomycetales;f__Incertae sedis	D_0__Bacteria;p__Firmicutes;D_2__Clostridia;D_3__Clostridiales;f__Eubacteriaceae	0.0689947787552564	0.116737297446133	0.754217218654352	1
k__Fungi;p__Ascomycota;c__Saccharomycetes;o__Saccharomycetales;f__Incertae sedis	D_0__Bacteria;p__Firmicutes;D_2__Clostridia;D_3__Clostridiales;f__Peptococcaceae	0.0684970863323266	0.118436044547437	0.757061541884679	-1
k__Fungi;p__Ascomycota;c__Sordariomycetes;o__Hypocreales;f__Nectriaceae	D_0__Bacteria;p__Actinobacteria;D_2__Coriobacteriia;D_3__Coriobacteriales;f__Coriobacteriales Incertae Sedis;g__uncultured	0.0685375542525876	0.118297271674903	0.757061541884679	-1
k__Fungi;p__Ascomycota;c__Sordariomycetes;o__Hypocreales;f__Nectriaceae;g__Fusarium	D_0__Bacteria;p__Actinobacteria;D_2__Coriobacteriia;D_3__Coriobacteriales;f__Coriobacteriales Incertae Sedis;g__uncultured	0.0685375542525876	0.118297271674903	0.757061541884679	-1
k__Fungi;p__Ascomycota;c__Sordariomycetes;o__Hypocreales;f__Nectriaceae	D_0__Bacteria;p__Actinobacteria;D_2__Coriobacteriia;D_3__Coriobacteriales;f__Eggerthellaceae;g__Eggerthella	0.0681412105943093	0.119661347541885	0.757061541884679	-1
k__Fungi;p__Ascomycota;c__Sordariomycetes;o__Hypocreales;f__Nectriaceae;g__Fusarium	D_0__Bacteria;p__Actinobacteria;D_2__Coriobacteriia;D_3__Coriobacteriales;f__Eggerthellaceae;g__Eggerthella	0.0681412105943093	0.119661347541885	0.757061541884679	-1
k__Fungi;p__Ascomycota;c__Sordariomycetes;o__Hypocreales;f__Nectriaceae	D_0__Bacteria;p__Firmicutes;D_2__Clostridia;D_3__Clostridiales;f__Lachnospiraceae;g__Lachnospira	0.068414143728003	0.118720829596267	0.757061541884679	-1
k__Fungi;p__Ascomycota;c__Sordariomycetes;o__Hypocreales;f__Nectriaceae;g__Fusarium	D_0__Bacteria;p__Firmicutes;D_2__Clostridia;D_3__Clostridiales;f__Lachnospiraceae;g__Lachnospira	0.068414143728003	0.118720829596267	0.757061541884679	-1
k__Fungi;p__Ascomycota;c__Dothideomycetes;o__Capnodiales;f__Davidiellaceae	D_0__Bacteria;p__Firmicutes;D_2__Clostridia;D_3__Clostridiales;f__Lachnospiraceae;g__Lachnospiraceae NC2004 group	0.0679742709617097	0.120239186064037	0.757061541884679	-1
k__Fungi;p__Ascomycota;c__Dothideomycetes;o__Capnodiales;f__Davidiellaceae;g__Davidiella	D_0__Bacteria;p__Firmicutes;D_2__Clostridia;D_3__Clostridiales;f__Lachnospiraceae;g__Lachnospiraceae NC2004 group	0.0679742709617097	0.120239186064037	0.757061541884679	-1
k__Fungi;p__Ascomycota;c__Saccharomycetes;o__Saccharomycetales;f__Incertae sedis	D_0__Bacteria;p__Firmicutes;D_2__Clostridia;D_3__Clostridiales;f__Ruminococcaceae;g__Intestinimonas	0.0681184517023569	0.119740009383959	0.757061541884679	1
k__Fungi;p__Ascomycota;c__Saccharomycetes;o__Saccharomycetales;f__Saccharomycetaceae;g__Saccharomyces	D_0__Bacteria;p__Firmicutes;D_2__Clostridia;D_3__Clostridiales;f__Ruminococcaceae;g__Ruminococcaceae NK4A214 group	0.0681808602978695	0.119524392408674	0.757061541884679	1
k__Fungi;p__Ascomycota;c__Dothideomycetes;o__Pleosporales;f__Pleosporaceae	D_0__Bacteria;p__Firmicutes;D_2__Clostridia;D_3__Clostridiales;f__Lachnospiraceae;g__Dorea	0.0677662030405685	0.120962118963291	0.758103602719245	-1
k__Fungi;p__Ascomycota;c__Dothideomycetes;o__Pleosporales;f__Pleosporaceae;g__Alternaria	D_0__Bacteria;p__Firmicutes;D_2__Clostridia;D_3__Clostridiales;f__Lachnospiraceae;g__Dorea	0.0677662030405685	0.120962118963291	0.758103602719245	-1
k__Fungi;p__Basidiomycota;c__Tremellomycetes;o__Filobasidiales;f__Filobasidiaceae	D_0__Bacteria;p__Firmicutes;D_2__Clostridia;D_3__Clostridiales;f__Ruminococcaceae;g__Candidatus Soleaferrea	0.0674389685036321	0.122105243253889	0.761757480849951	-1
k__Fungi;p__Basidiomycota;c__Tremellomycetes;o__Filobasidiales;f__Filobasidiaceae;g__Filobasidium	D_0__Bacteria;p__Firmicutes;D_2__Clostridia;D_3__Clostridiales;f__Ruminococcaceae;g__Candidatus Soleaferrea	0.0674389685036321	0.122105243253889	0.761757480849951	-1
k__Fungi;p__Ascomycota;c__Saccharomycetes;o__Saccharomycetales;f__Saccharomycetaceae	D_0__Bacteria;p__Firmicutes;D_2__Clostridia;D_3__Clostridiales;f__Lachnospiraceae;g__Eisenbergiella	0.0670669445477089	0.123413972097218	0.76816019245866	1
k__Fungi;p__Ascomycota;c__Saccharomycetes;o__Saccharomycetales;f__Incertae sedis	D_0__Bacteria;p__Firmicutes;D_2__Clostridia;D_3__Clostridiales;f__Ruminococcaceae;g__Hydrogenoanaerobacterium	0.06692472804505	0.123916843870538	0.769529258739416	-1
k__Fungi;p__Ascomycota;c__Saccharomycetes;o__Saccharomycetales;f__Saccharomycetaceae;g__Saccharomyces	D_0__Bacteria;p__Actinobacteria;D_2__Coriobacteriia;D_3__Coriobacteriales;f__uncultured	0.0667585591058498	0.124506215913011	0.769674789280432	1
k__Fungi;p__Ascomycota;c__Saccharomycetes;o__Saccharomycetales;f__Saccharomycetaceae;g__Saccharomyces	D_0__Bacteria;p__Actinobacteria;D_2__Coriobacteriia;D_3__Coriobacteriales;f__uncultured;g__uncultured bacterium	0.0667585591058498	0.124506215913011	0.769674789280432	1
k__Fungi;p__Ascomycota;c__Sordariomycetes;o__Hypocreales;f__Nectriaceae	D_0__Bacteria;p__Firmicutes;D_2__Bacilli;D_3__Lactobacillales;f__Streptococcaceae;g__Lactococcus	0.0658014289169897	0.127938942705857	0.787316570497584	-1
k__Fungi;p__Ascomycota;c__Sordariomycetes;o__Hypocreales;f__Nectriaceae;g__Fusarium	D_0__Bacteria;p__Firmicutes;D_2__Bacilli;D_3__Lactobacillales;f__Streptococcaceae;g__Lactococcus	0.0658014289169897	0.127938942705857	0.787316570497584	-1
k__Fungi;p__Ascomycota;c__Dothideomycetes;o__Pleosporales;f__Pleosporaceae	D_0__Bacteria;p__Firmicutes;D_2__Clostridia;D_3__Clostridiales;f__Peptococcaceae	0.0637568391811724	0.135489446623217	0.803075261958009	-1
k__Fungi;p__Ascomycota;c__Dothideomycetes;o__Pleosporales;f__Pleosporaceae;g__Alternaria	D_0__Bacteria;p__Firmicutes;D_2__Clostridia;D_3__Clostridiales;f__Peptococcaceae	0.0637568391811724	0.135489446623217	0.803075261958009	-1
k__Fungi;p__Ascomycota;c__Eurotiomycetes;o__Eurotiales;f__Trichocomaceae	D_0__Bacteria;p__Firmicutes;D_2__Negativicutes;D_3__Selenomonadales;f__Acidaminococcaceae	0.0636706699606585	0.135814198713487	0.803075261958009	1
k__Fungi;p__Ascomycota;c__Eurotiomycetes;o__Eurotiales;f__Trichocomaceae;g__Penicillium	D_0__Bacteria;p__Firmicutes;D_2__Negativicutes;D_3__Selenomonadales;f__Acidaminococcaceae	0.0636706699606585	0.135814198713487	0.803075261958009	1
k__Fungi;p__Ascomycota;c__Sordariomycetes;o__Hypocreales;f__Cordycipitaceae	D_0__Bacteria;p__Firmicutes;D_2__Bacilli;D_3__Lactobacillales;f__Streptococcaceae;g__Lactococcus	0.064684103497037	0.132028296311803	0.803075261958009	-1
k__Fungi;p__Ascomycota;c__Dothideomycetes;o__Pleosporales;f__Pleosporaceae	D_0__Bacteria;p__Firmicutes;D_2__Clostridia;D_3__Clostridiales;f__Family XIII;g__[Eubacterium] nodatum group	0.0641118896006465	0.134156930349321	0.803075261958009	1
k__Fungi;p__Ascomycota;c__Dothideomycetes;o__Pleosporales;f__Pleosporaceae;g__Alternaria	D_0__Bacteria;p__Firmicutes;D_2__Clostridia;D_3__Clostridiales;f__Family XIII;g__[Eubacterium] nodatum group	0.0641118896006465	0.134156930349321	0.803075261958009	1
k__Fungi;p__Ascomycota;c__Saccharomycetes;o__Saccharomycetales;f__Incertae sedis	D_0__Bacteria;p__Firmicutes;D_2__Clostridia;D_3__Clostridiales;f__Lachnospiraceae;g__Blautia	0.0642040987265564	0.133812336523448	0.803075261958009	1
k__Fungi;p__Ascomycota;c__Dothideomycetes;o__Pleosporales;f__Pleosporaceae	D_0__Bacteria;p__Firmicutes;D_2__Clostridia;D_3__Clostridiales;f__Lachnospiraceae;g__Tyzzerella 3	0.0638151274164474	0.135270072016675	0.803075261958009	-1
k__Fungi;p__Ascomycota;c__Dothideomycetes;o__Pleosporales;f__Pleosporaceae;g__Alternaria	D_0__Bacteria;p__Firmicutes;D_2__Clostridia;D_3__Clostridiales;f__Lachnospiraceae;g__Tyzzerella 3	0.0638151274164474	0.135270072016675	0.803075261958009	-1
k__Fungi;p__Ascomycota;c__Dothideomycetes;o__Pleosporales;f__Pleosporaceae	D_0__Bacteria;p__Firmicutes;D_2__Clostridia;D_3__Clostridiales;f__Ruminococcaceae;g__Faecalibacterium	0.0640350359240958	0.134444602505425	0.803075261958009	-1
k__Fungi;p__Ascomycota;c__Dothideomycetes;o__Pleosporales;f__Pleosporaceae;g__Alternaria	D_0__Bacteria;p__Firmicutes;D_2__Clostridia;D_3__Clostridiales;f__Ruminococcaceae;g__Faecalibacterium	0.0640350359240958	0.134444602505425	0.803075261958009	-1
k__Fungi;p__Ascomycota;c__Saccharomycetes;o__Saccharomycetales;f__Saccharomycetaceae	D_0__Bacteria;p__Firmicutes;D_2__Clostridia;D_3__Clostridiales;f__Ruminococcaceae;g__Ruminiclostridium 1	0.0644554674032363	0.132876025382919	0.803075261958009	1
k__Fungi;p__Ascomycota;c__Saccharomycetes;o__Saccharomycetales;f__Saccharomycetaceae;g__Saccharomyces	D_0__Bacteria;p__Firmicutes;D_2__Clostridia;D_3__Clostridiales;f__Ruminococcaceae;g__uncultured	0.0643204505180132	0.133378383875434	0.803075261958009	1
k__Fungi;p__Ascomycota;c__Eurotiomycetes;o__Eurotiales;f__Trichocomaceae	D_0__Bacteria;p__Firmicutes;D_2__Negativicutes;D_3__Selenomonadales;f__Acidaminococcaceae;g__Phascolarctobacterium	0.0636706699606585	0.135814198713487	0.803075261958009	1
k__Fungi;p__Ascomycota;c__Eurotiomycetes;o__Eurotiales;f__Trichocomaceae;g__Penicillium	D_0__Bacteria;p__Firmicutes;D_2__Negativicutes;D_3__Selenomonadales;f__Acidaminococcaceae;g__Phascolarctobacterium	0.0636706699606585	0.135814198713487	0.803075261958009	1
k__Fungi;p__Ascomycota;c__Dothideomycetes;o__Pleosporales;f__Pleosporaceae	D_0__Bacteria;p__Proteobacteria;D_2__Gammaproteobacteria;D_3__Betaproteobacteriales;f__Burkholderiaceae;g__Sutterella	0.0644695952465618	0.132823534807454	0.803075261958009	-1
k__Fungi;p__Ascomycota;c__Dothideomycetes;o__Pleosporales;f__Pleosporaceae;g__Alternaria	D_0__Bacteria;p__Proteobacteria;D_2__Gammaproteobacteria;D_3__Betaproteobacteriales;f__Burkholderiaceae;g__Sutterella	0.0644695952465618	0.132823534807454	0.803075261958009	-1
k__Fungi;p__Ascomycota;c__Saccharomycetes;o__Saccharomycetales;f__Incertae sedis;g__Debaryomyces	D_0__Bacteria;p__Bacteroidetes;D_2__Bacteroidia;D_3__Bacteroidales;f__Rikenellaceae	0.0634514366358006	0.136642828765819	0.806222330245182	1
k__Fungi;p__Ascomycota;c__Saccharomycetes;o__Saccharomycetales;f__Saccharomycetaceae	D_0__Bacteria;p__Actinobacteria;D_2__Coriobacteriia;D_3__Coriobacteriales;f__uncultured	0.0622696281242562	0.141168860205623	0.816977233530414	1
k__Fungi;p__Ascomycota;c__Saccharomycetes;o__Saccharomycetales;f__Saccharomycetaceae	D_0__Bacteria;p__Actinobacteria;D_2__Coriobacteriia;D_3__Coriobacteriales;f__uncultured;g__uncultured bacterium	0.0622696281242562	0.141168860205623	0.816977233530414	1
k__Fungi;p__Ascomycota;c__Saccharomycetes;o__Saccharomycetales;f__Incertae sedis;g__Debaryomyces	D_0__Bacteria;p__Firmicutes;D_2__Clostridia;D_3__Clostridiales;f__Family XIII;g__[Eubacterium] brachy group	0.0623364390160982	0.140910325311425	0.816977233530414	-1
k__Fungi;p__Ascomycota;c__Saccharomycetes;o__Saccharomycetales;f__Incertae sedis;g__Debaryomyces	D_0__Bacteria;p__Firmicutes;D_2__Clostridia;D_3__Clostridiales;f__Lachnospiraceae;g__Eisenbergiella	0.0625887412425612	0.139936886885377	0.816977233530414	-1
k__Fungi;p__Basidiomycota;c__Tremellomycetes;o__Filobasidiales;f__Filobasidiaceae	D_0__Bacteria;p__Firmicutes;D_2__Clostridia;D_3__Clostridiales;f__Ruminococcaceae;g__Ruminiclostridium	0.0624754715043853	0.140373342984971	0.816977233530414	-1
k__Fungi;p__Basidiomycota;c__Tremellomycetes;o__Filobasidiales;f__Filobasidiaceae;g__Filobasidium	D_0__Bacteria;p__Firmicutes;D_2__Clostridia;D_3__Clostridiales;f__Ruminococcaceae;g__Ruminiclostridium	0.0624754715043853	0.140373342984971	0.816977233530414	-1
k__Fungi;p__Ascomycota;c__Eurotiomycetes;o__Eurotiales;f__Trichocomaceae	D_0__Bacteria;p__Firmicutes;D_2__Clostridia;D_3__Clostridiales;f__Ruminococcaceae;g__Ruminococcaceae UCG-013	0.0626259399510741	0.139793751502184	0.816977233530414	-1
k__Fungi;p__Ascomycota;c__Saccharomycetes;o__Saccharomycetales;f__Saccharomycetaceae	D_0__Bacteria;p__Firmicutes;D_2__Clostridia;D_3__Clostridiales;f__Ruminococcaceae;g__Ruminococcaceae UCG-013	0.0626542582027033	0.139684853271575	0.816977233530414	1
k__Fungi;p__Ascomycota;c__Eurotiomycetes;o__Eurotiales;f__Trichocomaceae;g__Penicillium	D_0__Bacteria;p__Firmicutes;D_2__Clostridia;D_3__Clostridiales;f__Ruminococcaceae;g__Ruminococcaceae UCG-013	0.0626259399510741	0.139793751502184	0.816977233530414	-1
k__Fungi;p__Ascomycota;c__Saccharomycetes;o__Saccharomycetales;f__Saccharomycetaceae;g__Saccharomyces	D_0__Bacteria;p__Firmicutes;D_2__Clostridia;D_3__Clostridiales;f__Family XIII;g__[Eubacterium] brachy group	0.062042997812003	0.142048223258235	0.819689683784894	1
k__Fungi;p__Ascomycota;c__Sordariomycetes;o__Hypocreales;f__Cordycipitaceae	D_0__Bacteria;p__Proteobacteria;D_2__Gammaproteobacteria;D_3__Enterobacteriales;f__Enterobacteriaceae;g__Klebsiella	0.0619936295274914	0.142240268656791	0.819689683784894	1
k__Fungi;p__Ascomycota;c__Saccharomycetes;o__Saccharomycetales;f__Incertae sedis;g__Debaryomyces	D_0__Bacteria;p__Firmicutes;D_2__Clostridia;D_3__Clostridiales;f__Lachnospiraceae;g__Lachnospiraceae FCS020 group	0.0611279568197426	0.145636194036439	0.825309836760425	1
k__Fungi;p__Ascomycota;c__Eurotiomycetes;o__Eurotiales;f__Trichocomaceae	D_0__Bacteria;p__Firmicutes;D_2__Clostridia;D_3__Clostridiales;f__Ruminococcaceae;g__Ruminococcaceae UCG-005	0.0613611035507212	0.144716297188819	0.825309836760425	1
k__Fungi;p__Ascomycota;c__Eurotiomycetes;o__Eurotiales;f__Trichocomaceae;g__Penicillium	D_0__Bacteria;p__Firmicutes;D_2__Clostridia;D_3__Clostridiales;f__Ruminococcaceae;g__Ruminococcaceae UCG-005	0.0613611035507212	0.144716297188819	0.825309836760425	1
k__Fungi;p__Ascomycota;c__Sordariomycetes;o__Hypocreales;f__Cordycipitaceae	D_0__Bacteria;p__Firmicutes;D_2__Clostridia;D_3__Clostridiales;f__Ruminococcaceae;g__Ruminococcaceae UCG-013	0.0611955842382526	0.145368963452584	0.825309836760425	-1
k__Fungi;p__Ascomycota;c__Sordariomycetes;o__Hypocreales;f__Nectriaceae	D_0__Bacteria;p__Firmicutes;D_2__Negativicutes;D_3__Selenomonadales;f__Veillonellaceae;g__Allisonella	0.0611627257849516	0.145498763021043	0.825309836760425	1
k__Fungi;p__Ascomycota;c__Sordariomycetes;o__Hypocreales;f__Nectriaceae;g__Fusarium	D_0__Bacteria;p__Firmicutes;D_2__Negativicutes;D_3__Selenomonadales;f__Veillonellaceae;g__Allisonella	0.0611627257849516	0.145498763021043	0.825309836760425	1
k__Fungi;p__Ascomycota;c__Sordariomycetes;o__Hypocreales;f__Nectriaceae	D_0__Bacteria;p__Proteobacteria;D_2__Gammaproteobacteria;D_3__Betaproteobacteriales;f__Burkholderiaceae;g__Parasutterella	0.061126257697212	0.145642912369487	0.825309836760425	1
k__Fungi;p__Ascomycota;c__Sordariomycetes;o__Hypocreales;f__Nectriaceae;g__Fusarium	D_0__Bacteria;p__Proteobacteria;D_2__Gammaproteobacteria;D_3__Betaproteobacteriales;f__Burkholderiaceae;g__Parasutterella	0.061126257697212	0.145642912369487	0.825309836760425	1
k__Fungi;p__Ascomycota;c__Saccharomycetes;o__Saccharomycetales;f__Incertae sedis;g__Candida	D_0__Bacteria;p__Firmicutes;D_2__Clostridia;D_3__Clostridiales;f__Ruminococcaceae;g__Ruminococcaceae UCG-010	0.0609747306899876	0.14624288409949	0.826986787423312	-1
k__Fungi;p__Ascomycota;c__Saccharomycetes;o__Saccharomycetales;f__Incertae sedis	D_0__Archaea;p__Euryarchaeota;D_2__Methanobacteria;D_3__Methanobacteriales;f__Methanobacteriaceae	0.0582167709390358	0.15745152046751	0.829955700882448	-1
k__Fungi;p__Ascomycota;c__Sordariomycetes;o__Hypocreales;f__Cordycipitaceae	D_0__Bacteria;p__Actinobacteria;D_2__Coriobacteriia;D_3__Coriobacteriales;f__Atopobiaceae	0.0599549618917624	0.15032357804132	0.829955700882448	-1
k__Fungi;p__Ascomycota;c__Sordariomycetes;o__Hypocreales;f__Cordycipitaceae	D_0__Bacteria;p__Actinobacteria;D_2__Coriobacteriia;D_3__Coriobacteriales;f__Eggerthellaceae	0.0578942581706163	0.158797993589162	0.829955700882448	-1
k__Fungi;p__Ascomycota;c__Saccharomycetes;o__Saccharomycetales;f__Incertae sedis;g__Debaryomyces	D_0__Bacteria;p__Actinobacteria;D_2__Coriobacteriia;D_3__Coriobacteriales;f__Eggerthellaceae	0.0581918606795688	0.157555252602634	0.829955700882448	-1
k__Fungi;p__Ascomycota;c__Dothideomycetes;o__Capnodiales;f__Davidiellaceae	D_0__Bacteria;p__Firmicutes;D_2__Clostridia;D_3__Clostridiales;f__Peptococcaceae	0.059839674147345	0.150789616294518	0.829955700882448	1
k__Fungi;p__Ascomycota;c__Dothideomycetes;o__Capnodiales;f__Davidiellaceae;g__Davidiella	D_0__Bacteria;p__Firmicutes;D_2__Clostridia;D_3__Clostridiales;f__Peptococcaceae	0.059839674147345	0.150789616294518	0.829955700882448	1
k__Fungi;p__Ascomycota;c__Saccharomycetes;o__Saccharomycetales;f__Incertae sedis;g__Debaryomyces	D_0__Bacteria;p__Firmicutes;D_2__Clostridia;D_3__Clostridiales;Other	0.0590827669349121	0.153873079883103	0.829955700882448	-1
k__Fungi;p__Ascomycota;c__Saccharomycetes;o__Saccharomycetales;f__Saccharomycetaceae	D_0__Bacteria;p__Verrucomicrobia;D_2__Verrucomicrobiae;D_3__Verrucomicrobiales;f__Akkermansiaceae	0.0590471509566081	0.154019186680581	0.829955700882448	1
k__Fungi;p__Ascomycota;c__Saccharomycetes;o__Saccharomycetales;f__Saccharomycetaceae;g__Saccharomyces	D_0__Bacteria;p__Verrucomicrobia;D_2__Verrucomicrobiae;D_3__Verrucomicrobiales;f__Akkermansiaceae	0.0597335369098071	0.15121950986251	0.829955700882448	1
k__Fungi;p__Basidiomycota;c__Tremellomycetes;o__Filobasidiales;f__Filobasidiaceae	Unassigned;Other;Other;Other;Other	0.0590117352848404	0.154164562292753	0.829955700882448	1
k__Fungi;p__Basidiomycota;c__Tremellomycetes;o__Filobasidiales;f__Filobasidiaceae;g__Filobasidium	Unassigned;Other;Other;Other;Other	0.0590117352848404	0.154164562292753	0.829955700882448	1
k__Fungi;p__Ascomycota;c__Saccharomycetes;o__Saccharomycetales;f__Incertae sedis	D_0__Archaea;p__Euryarchaeota;D_2__Methanobacteria;D_3__Methanobacteriales;f__Methanobacteriaceae;g__Methanobrevibacter	0.0582167709390358	0.15745152046751	0.829955700882448	-1
k__Fungi;p__Ascomycota;c__Saccharomycetes;o__Saccharomycetales;f__Saccharomycetaceae	D_0__Bacteria;p__Firmicutes;D_2__Bacilli;D_3__Lactobacillales;f__Streptococcaceae;g__Lactococcus	0.0598229362439732	0.150857356937229	0.829955700882448	1
k__Fungi;p__Ascomycota;c__Dothideomycetes;o__Pleosporales;f__Pleosporaceae	D_0__Bacteria;p__Firmicutes;D_2__Clostridia;D_3__Clostridiales;f__Lachnospiraceae;g__CAG-56	0.0579253113734475	0.158668022405504	0.829955700882448	-1
k__Fungi;p__Ascomycota;c__Dothideomycetes;o__Pleosporales;f__Pleosporaceae;g__Alternaria	D_0__Bacteria;p__Firmicutes;D_2__Clostridia;D_3__Clostridiales;f__Lachnospiraceae;g__CAG-56	0.0579253113734475	0.158668022405504	0.829955700882448	-1
k__Fungi;p__Ascomycota;c__Saccharomycetes;o__Saccharomycetales;f__Incertae sedis;g__Candida	D_0__Bacteria;p__Firmicutes;D_2__Clostridia;D_3__Clostridiales;f__Lachnospiraceae;g__CAG-56	0.0595870584413966	0.151814130752291	0.829955700882448	-1
k__Fungi;p__Ascomycota;c__Sordariomycetes;o__Hypocreales;f__Nectriaceae	D_0__Bacteria;p__Firmicutes;D_2__Clostridia;D_3__Clostridiales;f__Lachnospiraceae;g__Lachnospiraceae NC2004 group	0.0587117679398771	0.15539950036387	0.829955700882448	-1
k__Fungi;p__Ascomycota;c__Sordariomycetes;o__Hypocreales;f__Nectriaceae;g__Fusarium	D_0__Bacteria;p__Firmicutes;D_2__Clostridia;D_3__Clostridiales;f__Lachnospiraceae;g__Lachnospiraceae NC2004 group	0.0587117679398771	0.15539950036387	0.829955700882448	-1
k__Fungi;p__Ascomycota;c__Eurotiomycetes;o__Eurotiales;f__Trichocomaceae	D_0__Bacteria;p__Firmicutes;D_2__Clostridia;D_3__Clostridiales;f__Lachnospiraceae;g__Lachnospiraceae UCG-006	0.0579943607920611	0.158379269286991	0.829955700882448	1
k__Fungi;p__Ascomycota;c__Eurotiomycetes;o__Eurotiales;f__Trichocomaceae;g__Penicillium	D_0__Bacteria;p__Firmicutes;D_2__Clostridia;D_3__Clostridiales;f__Lachnospiraceae;g__Lachnospiraceae UCG-006	0.0579943607920611	0.158379269286991	0.829955700882448	1
k__Fungi;p__Ascomycota;c__Dothideomycetes;o__Pleosporales;f__Pleosporaceae	D_0__Bacteria;p__Firmicutes;D_2__Clostridia;D_3__Clostridiales;f__Lachnospiraceae;g__Lachnospiraceae UCG-008	0.0602630373479047	0.149082906409305	0.829955700882448	-1
k__Fungi;p__Ascomycota;c__Dothideomycetes;o__Pleosporales;f__Pleosporaceae;g__Alternaria	D_0__Bacteria;p__Firmicutes;D_2__Clostridia;D_3__Clostridiales;f__Lachnospiraceae;g__Lachnospiraceae UCG-008	0.0602630373479047	0.149082906409305	0.829955700882448	-1
k__Fungi;p__Ascomycota;c__Dothideomycetes;o__Pleosporales;f__Pleosporaceae	D_0__Bacteria;p__Firmicutes;D_2__Clostridia;D_3__Clostridiales;f__Lachnospiraceae;g__Shuttleworthia	0.0603869836879277	0.148585678825686	0.829955700882448	-1
k__Fungi;p__Ascomycota;c__Dothideomycetes;o__Pleosporales;f__Pleosporaceae;g__Alternaria	D_0__Bacteria;p__Firmicutes;D_2__Clostridia;D_3__Clostridiales;f__Lachnospiraceae;g__Shuttleworthia	0.0603869836879277	0.148585678825686	0.829955700882448	-1
k__Fungi;p__Ascomycota;c__Saccharomycetes;o__Saccharomycetales;f__Incertae sedis;g__Candida	D_0__Bacteria;p__Firmicutes;D_2__Clostridia;D_3__Clostridiales;f__Lachnospiraceae;g__[Eubacterium] eligens group	0.0600497631228733	0.149941070553349	0.829955700882448	-1
k__Fungi;p__Ascomycota;c__Sordariomycetes;o__Hypocreales;f__Nectriaceae	D_0__Bacteria;p__Firmicutes;D_2__Clostridia;D_3__Clostridiales;f__Lachnospiraceae;g__[Eubacterium] ventriosum group	0.0577215232095498	0.159522231632212	0.829955700882448	-1
k__Fungi;p__Ascomycota;c__Sordariomycetes;o__Hypocreales;f__Nectriaceae;g__Fusarium	D_0__Bacteria;p__Firmicutes;D_2__Clostridia;D_3__Clostridiales;f__Lachnospiraceae;g__[Eubacterium] ventriosum group	0.0577215232095498	0.159522231632212	0.829955700882448	-1
k__Fungi;p__Ascomycota;c__Saccharomycetes;o__Saccharomycetales;f__Incertae sedis;g__Debaryomyces	D_0__Bacteria;p__Firmicutes;D_2__Clostridia;D_3__Clostridiales;f__Peptococcaceae;g__Peptococcus	0.0574664222972543	0.160595739262088	0.829955700882448	-1
k__Fungi;p__Ascomycota;c__Saccharomycetes;o__Saccharomycetales;f__Incertae sedis;g__Debaryomyces	D_0__Bacteria;p__Firmicutes;D_2__Clostridia;D_3__Clostridiales;f__Peptostreptococcaceae;Other	0.0574170808376523	0.160803917045974	0.829955700882448	-1
k__Fungi;p__Ascomycota;c__Saccharomycetes;o__Saccharomycetales;f__Incertae sedis	D_0__Bacteria;p__Firmicutes;D_2__Clostridia;D_3__Clostridiales;f__Ruminococcaceae;g__Oscillibacter	0.0594885408637098	0.152214925444332	0.829955700882448	1
k__Fungi;p__Ascomycota;c__Saccharomycetes;o__Saccharomycetales;f__Incertae sedis;g__Debaryomyces	D_0__Bacteria;p__Firmicutes;D_2__Clostridia;D_3__Clostridiales;f__Ruminococcaceae;g__Ruminiclostridium	0.0580838191781622	0.158005679657292	0.829955700882448	-1
k__Fungi;p__Ascomycota;c__Saccharomycetes;o__Saccharomycetales;f__Saccharomycetaceae	D_0__Bacteria;p__Firmicutes;D_2__Clostridia;D_3__Clostridiales;f__Ruminococcaceae;g__Ruminococcaceae NK4A214 group	0.0584999022369228	0.156275634871185	0.829955700882448	1
k__Fungi;p__Ascomycota;c__Saccharomycetes;o__Saccharomycetales;f__Incertae sedis;g__Candida	D_0__Bacteria;p__Firmicutes;D_2__Clostridia;D_3__Clostridiales;f__Ruminococcaceae;g__Ruminococcaceae UCG-003	0.0606661613153522	0.147469764857627	0.829955700882448	-1
k__Fungi;p__Ascomycota;c__Sordariomycetes;o__Hypocreales;f__Nectriaceae	D_0__Bacteria;p__Firmicutes;D_2__Clostridia;D_3__Clostridiales;f__Ruminococcaceae;g__Ruminococcaceae UCG-013	0.0586734702912939	0.155557634515832	0.829955700882448	-1
k__Fungi;p__Ascomycota;c__Sordariomycetes;o__Hypocreales;f__Nectriaceae;g__Fusarium	D_0__Bacteria;p__Firmicutes;D_2__Clostridia;D_3__Clostridiales;f__Ruminococcaceae;g__Ruminococcaceae UCG-013	0.0586734702912939	0.155557634515832	0.829955700882448	-1
k__Fungi;p__Ascomycota;c__Dothideomycetes;o__Capnodiales;f__Davidiellaceae	D_0__Bacteria;p__Firmicutes;D_2__Clostridia;D_3__Clostridiales;f__Ruminococcaceae;g__[Eubacterium] coprostanoligenes group	0.0586534376726717	0.155640392907808	0.829955700882448	-1
k__Fungi;p__Ascomycota;c__Dothideomycetes;o__Capnodiales;f__Davidiellaceae;g__Davidiella	D_0__Bacteria;p__Firmicutes;D_2__Clostridia;D_3__Clostridiales;f__Ruminococcaceae;g__[Eubacterium] coprostanoligenes group	0.0586534376726717	0.155640392907808	0.829955700882448	-1
k__Fungi;p__Ascomycota;c__Saccharomycetes;o__Saccharomycetales;f__Saccharomycetaceae	D_0__Bacteria;p__Firmicutes;D_2__Clostridia;D_3__Clostridiales;f__Ruminococcaceae;g__uncultured	0.0575139445645936	0.16039540253484	0.829955700882448	1
k__Fungi;p__Ascomycota;c__Dothideomycetes;o__Pleosporales;f__Pleosporaceae	D_0__Bacteria;p__Firmicutes;D_2__Clostridia;D_3__Clostridiales;f__Ruminococcaceae;Other	0.0575246561662595	0.160350268736851	0.829955700882448	-1
k__Fungi;p__Ascomycota;c__Dothideomycetes;o__Pleosporales;f__Pleosporaceae;g__Alternaria	D_0__Bacteria;p__Firmicutes;D_2__Clostridia;D_3__Clostridiales;f__Ruminococcaceae;Other	0.0575246561662595	0.160350268736851	0.829955700882448	-1
k__Fungi;p__Ascomycota;c__Saccharomycetes;o__Saccharomycetales;f__Incertae sedis;g__Debaryomyces	D_0__Bacteria;p__Firmicutes;D_2__Clostridia;D_3__Clostridiales;Other;Other	0.0590827669349121	0.153873079883103	0.829955700882448	-1
k__Fungi;p__Ascomycota;c__Saccharomycetes;o__Saccharomycetales;f__Incertae sedis	D_0__Bacteria;p__Proteobacteria;D_2__Gammaproteobacteria;D_3__Betaproteobacteriales;f__Burkholderiaceae;g__Oxalobacter	0.0577966896641617	0.159206811982136	0.829955700882448	-1
k__Fungi;p__Ascomycota;c__Saccharomycetes;o__Saccharomycetales;f__Saccharomycetaceae	D_0__Bacteria;p__Verrucomicrobia;D_2__Verrucomicrobiae;D_3__Verrucomicrobiales;f__Akkermansiaceae;g__Akkermansia	0.0590471509566081	0.154019186680581	0.829955700882448	1
k__Fungi;p__Ascomycota;c__Saccharomycetes;o__Saccharomycetales;f__Saccharomycetaceae;g__Saccharomyces	D_0__Bacteria;p__Verrucomicrobia;D_2__Verrucomicrobiae;D_3__Verrucomicrobiales;f__Akkermansiaceae;g__Akkermansia	0.0597335369098071	0.15121950986251	0.829955700882448	1
k__Fungi;p__Basidiomycota;c__Tremellomycetes;o__Filobasidiales;f__Filobasidiaceae	Unassigned;Other;Other;Other;Other;Other	0.0590117352848404	0.154164562292753	0.829955700882448	1
k__Fungi;p__Basidiomycota;c__Tremellomycetes;o__Filobasidiales;f__Filobasidiaceae;g__Filobasidium	Unassigned;Other;Other;Other;Other;Other	0.0590117352848404	0.154164562292753	0.829955700882448	1
k__Fungi;p__Ascomycota;c__Dothideomycetes;o__Pleosporales;f__Pleosporaceae	D_0__Bacteria;p__Firmicutes;D_2__Clostridia;D_3__Clostridiales;f__Ruminococcaceae;g__Oscillibacter	0.0570837385788146	0.162214920091746	0.834072935065312	-1
k__Fungi;p__Ascomycota;c__Dothideomycetes;o__Pleosporales;f__Pleosporaceae;g__Alternaria	D_0__Bacteria;p__Firmicutes;D_2__Clostridia;D_3__Clostridiales;f__Ruminococcaceae;g__Oscillibacter	0.0570837385788146	0.162214920091746	0.834072935065312	-1
k__Fungi;p__Ascomycota;c__Sordariomycetes;o__Hypocreales;f__Cordycipitaceae	D_0__Bacteria;p__Firmicutes;D_2__Bacilli;D_3__Bacillales;f__Family XI	0.0564154496878945	0.165067799175483	0.837670823895951	-1
k__Fungi;p__Ascomycota;c__Saccharomycetes;o__Saccharomycetales;f__Incertae sedis;g__Candida	D_0__Bacteria;p__Proteobacteria;D_2__Gammaproteobacteria;D_3__Betaproteobacteriales;f__Burkholderiaceae	0.056656134474188	0.16403663059403	0.837670823895951	-1
k__Fungi;p__Ascomycota;c__Dothideomycetes;o__Pleosporales;f__Pleosporaceae	D_0__Bacteria;p__Tenericutes;D_2__Mollicutes;D_3__Mollicutes RF39;f__uncultured bacterium	0.0563402255912456	0.165390937198663	0.837670823895951	1
k__Fungi;p__Ascomycota;c__Dothideomycetes;o__Pleosporales;f__Pleosporaceae;g__Alternaria	D_0__Bacteria;p__Tenericutes;D_2__Mollicutes;D_3__Mollicutes RF39;f__uncultured bacterium	0.0563402255912456	0.165390937198663	0.837670823895951	1
k__Fungi;p__Ascomycota;c__Sordariomycetes;o__Hypocreales;f__Cordycipitaceae	D_0__Bacteria;p__Firmicutes;D_2__Bacilli;D_3__Bacillales;f__Family XI;g__Gemella	0.0564154496878945	0.165067799175483	0.837670823895951	-1
k__Fungi;p__Ascomycota;c__Sordariomycetes;o__Hypocreales;f__Nectriaceae	D_0__Bacteria;p__Firmicutes;D_2__Clostridia;D_3__Clostridiales;f__Lachnospiraceae;g__Lachnospiraceae FCS020 group	0.0560572241866626	0.166610263135187	0.837670823895951	-1
k__Fungi;p__Ascomycota;c__Sordariomycetes;o__Hypocreales;f__Nectriaceae;g__Fusarium	D_0__Bacteria;p__Firmicutes;D_2__Clostridia;D_3__Clostridiales;f__Lachnospiraceae;g__Lachnospiraceae FCS020 group	0.0560572241866626	0.166610263135187	0.837670823895951	-1
k__Fungi;p__Ascomycota;c__Eurotiomycetes;o__Eurotiales;f__Trichocomaceae	D_0__Bacteria;p__Firmicutes;D_2__Clostridia;D_3__Clostridiales;f__Lachnospiraceae;g__[Eubacterium] oxidoreducens group	0.0561005868895819	0.166423059175707	0.837670823895951	1
k__Fungi;p__Ascomycota;c__Eurotiomycetes;o__Eurotiales;f__Trichocomaceae;g__Penicillium	D_0__Bacteria;p__Firmicutes;D_2__Clostridia;D_3__Clostridiales;f__Lachnospiraceae;g__[Eubacterium] oxidoreducens group	0.0561005868895819	0.166423059175707	0.837670823895951	1
k__Fungi;p__Ascomycota;c__Saccharomycetes;o__Saccharomycetales;f__Incertae sedis;g__Candida	D_0__Bacteria;p__Firmicutes;D_2__Clostridia;D_3__Clostridiales;f__Lachnospiraceae;g__[Eubacterium] xylanophilum group	0.0563778406097012	0.165229304561175	0.837670823895951	-1
k__Fungi;p__Ascomycota;c__Dothideomycetes;o__Pleosporales;f__Pleosporaceae	D_0__Bacteria;p__Tenericutes;D_2__Mollicutes;D_3__Mollicutes RF39;f__uncultured bacterium;g__uncultured bacterium	0.0563402255912456	0.165390937198663	0.837670823895951	1
k__Fungi;p__Ascomycota;c__Dothideomycetes;o__Pleosporales;f__Pleosporaceae;g__Alternaria	D_0__Bacteria;p__Tenericutes;D_2__Mollicutes;D_3__Mollicutes RF39;f__uncultured bacterium;g__uncultured bacterium	0.0563402255912456	0.165390937198663	0.837670823895951	1
k__Fungi;p__Ascomycota;c__Saccharomycetes;o__Saccharomycetales;f__Incertae sedis	D_0__Bacteria;p__Firmicutes;D_2__Clostridia;D_3__Clostridiales;f__Ruminococcaceae;g__Ruminococcaceae UCG-014	0.0558447050880132	0.167529697659008	0.83919111902855	-1
k__Fungi;p__Ascomycota;c__Saccharomycetes;o__Saccharomycetales;f__Saccharomycetaceae	D_0__Bacteria;p__Proteobacteria;D_2__Gammaproteobacteria;D_3__Betaproteobacteriales;f__Burkholderiaceae;g__Parasutterella	0.0559042878131759	0.167271593756146	0.83919111902855	1
k__Fungi;p__Ascomycota;c__Dothideomycetes;o__Capnodiales;f__Davidiellaceae	D_0__Archaea;p__Euryarchaeota;D_2__Methanobacteria;D_3__Methanobacteriales;f__Methanobacteriaceae	0.0523205994359795	0.183248386621148	0.856616287104371	-1
k__Fungi;p__Ascomycota;c__Dothideomycetes;o__Capnodiales;f__Davidiellaceae;g__Davidiella	D_0__Archaea;p__Euryarchaeota;D_2__Methanobacteria;D_3__Methanobacteriales;f__Methanobacteriaceae	0.0523205994359795	0.183248386621148	0.856616287104371	-1
k__Fungi;p__Ascomycota;c__Sordariomycetes;o__Hypocreales;f__Nectriaceae	D_0__Bacteria;p__Actinobacteria;D_2__Coriobacteriia;D_3__Coriobacteriales;f__Eggerthellaceae	0.0539855452103357	0.175711362224623	0.856616287104371	-1
k__Fungi;p__Ascomycota;c__Sordariomycetes;o__Hypocreales;f__Nectriaceae;g__Fusarium	D_0__Bacteria;p__Actinobacteria;D_2__Coriobacteriia;D_3__Coriobacteriales;f__Eggerthellaceae	0.0539855452103357	0.175711362224623	0.856616287104371	-1
k__Fungi;p__Ascomycota;c__Eurotiomycetes;o__Eurotiales;f__Trichocomaceae	D_0__Bacteria;p__Actinobacteria;D_2__Coriobacteriia;D_3__Coriobacteriales;f__uncultured	0.0538415504270051	0.176355384069317	0.856616287104371	1
k__Fungi;p__Ascomycota;c__Eurotiomycetes;o__Eurotiales;f__Trichocomaceae;g__Penicillium	D_0__Bacteria;p__Actinobacteria;D_2__Coriobacteriia;D_3__Coriobacteriales;f__uncultured	0.0538415504270051	0.176355384069317	0.856616287104371	1
k__Fungi;p__Ascomycota;c__Saccharomycetes;o__Saccharomycetales;f__Incertae sedis;g__Debaryomyces	D_0__Bacteria;p__Firmicutes;D_2__Clostridia;D_3__Clostridiales;f__Christensenellaceae	0.0534164474039996	0.178265327522737	0.856616287104371	-1
k__Fungi;p__Ascomycota;c__Saccharomycetes;o__Saccharomycetales;f__Saccharomycetaceae;g__Saccharomyces	D_0__Bacteria;p__Firmicutes;D_2__Clostridia;D_3__Clostridiales;f__Christensenellaceae	0.0518216114469757	0.185545752508301	0.856616287104371	1
k__Fungi;p__Ascomycota;c__Eurotiomycetes;o__Eurotiales;f__Trichocomaceae	D_0__Bacteria;p__Firmicutes;D_2__Clostridia;D_3__Clostridiales;f__Defluviitaleaceae	0.0519166548051711	0.185106802458847	0.856616287104371	1
k__Fungi;p__Basidiomycota;c__Tremellomycetes;o__Filobasidiales;f__Filobasidiaceae	D_0__Bacteria;p__Firmicutes;D_2__Clostridia;D_3__Clostridiales;f__Defluviitaleaceae	0.0514331392739122	0.187346553179072	0.856616287104371	1
k__Fungi;p__Ascomycota;c__Eurotiomycetes;o__Eurotiales;f__Trichocomaceae;g__Penicillium	D_0__Bacteria;p__Firmicutes;D_2__Clostridia;D_3__Clostridiales;f__Defluviitaleaceae	0.0519166548051711	0.185106802458847	0.856616287104371	1
k__Fungi;p__Basidiomycota;c__Tremellomycetes;o__Filobasidiales;f__Filobasidiaceae;g__Filobasidium	D_0__Bacteria;p__Firmicutes;D_2__Clostridia;D_3__Clostridiales;f__Defluviitaleaceae	0.0514331392739122	0.187346553179072	0.856616287104371	1
k__Fungi;p__Ascomycota;c__Saccharomycetes;o__Saccharomycetales;f__Incertae sedis;g__Debaryomyces	D_0__Bacteria;p__Firmicutes;D_2__Clostridia;D_3__Clostridiales;f__Family XI	0.0512479790003127	0.188208651824741	0.856616287104371	-1
k__Fungi;p__Ascomycota;c__Dothideomycetes;o__Pleosporales;f__Pleosporaceae	D_0__Bacteria;p__Firmicutes;D_2__Negativicutes;D_3__Selenomonadales;f__Acidaminococcaceae	0.0512945946528371	0.187991382186028	0.856616287104371	-1
k__Fungi;p__Ascomycota;c__Dothideomycetes;o__Pleosporales;f__Pleosporaceae;g__Alternaria	D_0__Bacteria;p__Firmicutes;D_2__Negativicutes;D_3__Selenomonadales;f__Acidaminococcaceae	0.0512945946528371	0.187991382186028	0.856616287104371	-1
k__Fungi;p__Ascomycota;c__Saccharomycetes;o__Saccharomycetales;f__Incertae sedis;g__Candida	D_0__Bacteria;p__Proteobacteria;D_2__Deltaproteobacteria;D_3__Desulfovibrionales;f__Desulfovibrionaceae	0.0519118716494456	0.185128877727412	0.856616287104371	-1
k__Fungi;p__Ascomycota;c__Dothideomycetes;o__Pleosporales;f__Pleosporaceae	D_0__Bacteria;p__Proteobacteria;D_2__Gammaproteobacteria;D_3__Betaproteobacteriales;f__Burkholderiaceae	0.0531790059919294	0.179337750641346	0.856616287104371	-1
k__Fungi;p__Ascomycota;c__Dothideomycetes;o__Pleosporales;f__Pleosporaceae;g__Alternaria	D_0__Bacteria;p__Proteobacteria;D_2__Gammaproteobacteria;D_3__Betaproteobacteriales;f__Burkholderiaceae	0.0531790059919294	0.179337750641346	0.856616287104371	-1
k__Fungi;p__Ascomycota;c__Saccharomycetes;o__Saccharomycetales;f__Incertae sedis	D_0__Bacteria;Other;Other;Other;Other	0.0519426143566833	0.184987022051848	0.856616287104371	1
k__Fungi;p__Ascomycota;c__Dothideomycetes;o__Capnodiales;f__Davidiellaceae	D_0__Archaea;p__Euryarchaeota;D_2__Methanobacteria;D_3__Methanobacteriales;f__Methanobacteriaceae;g__Methanobrevibacter	0.0523205994359795	0.183248386621148	0.856616287104371	-1
k__Fungi;p__Ascomycota;c__Dothideomycetes;o__Capnodiales;f__Davidiellaceae;g__Davidiella	D_0__Archaea;p__Euryarchaeota;D_2__Methanobacteria;D_3__Methanobacteriales;f__Methanobacteriaceae;g__Methanobrevibacter	0.0523205994359795	0.183248386621148	0.856616287104371	-1
k__Fungi;p__Ascomycota;c__Eurotiomycetes;o__Eurotiales;f__Trichocomaceae	D_0__Bacteria;p__Actinobacteria;D_2__Coriobacteriia;D_3__Coriobacteriales;f__uncultured;g__uncultured bacterium	0.0538415504270051	0.176355384069317	0.856616287104371	1
k__Fungi;p__Ascomycota;c__Eurotiomycetes;o__Eurotiales;f__Trichocomaceae;g__Penicillium	D_0__Bacteria;p__Actinobacteria;D_2__Coriobacteriia;D_3__Coriobacteriales;f__uncultured;g__uncultured bacterium	0.0538415504270051	0.176355384069317	0.856616287104371	1
k__Fungi;p__Ascomycota;c__Saccharomycetes;o__Saccharomycetales;f__Incertae sedis;g__Candida	D_0__Bacteria;p__Bacteroidetes;D_2__Bacteroidia;D_3__Bacteroidales;f__Rikenellaceae;g__Alistipes	0.0543005830516022	0.174307521759928	0.856616287104371	1
k__Fungi;p__Ascomycota;c__Dothideomycetes;o__Capnodiales;f__Davidiellaceae	D_0__Bacteria;p__Firmicutes;D_2__Clostridia;D_3__Clostridiales;f__Christensenellaceae;g__Catabacter	0.0517132668375864	0.18604691651468	0.856616287104371	-1
k__Fungi;p__Ascomycota;c__Dothideomycetes;o__Capnodiales;f__Davidiellaceae;g__Davidiella	D_0__Bacteria;p__Firmicutes;D_2__Clostridia;D_3__Clostridiales;f__Christensenellaceae;g__Catabacter	0.0517132668375864	0.18604691651468	0.856616287104371	-1
k__Fungi;p__Ascomycota;c__Saccharomycetes;o__Saccharomycetales;f__Incertae sedis;g__Debaryomyces	D_0__Bacteria;p__Firmicutes;D_2__Clostridia;D_3__Clostridiales;f__Christensenellaceae;g__Christensenellaceae R-7 group	0.051945251302947	0.184974857554759	0.856616287104371	-1
k__Fungi;p__Ascomycota;c__Eurotiomycetes;o__Eurotiales;f__Trichocomaceae	D_0__Bacteria;p__Firmicutes;D_2__Clostridia;D_3__Clostridiales;f__Defluviitaleaceae;g__Defluviitaleaceae UCG-011	0.0519166548051711	0.185106802458847	0.856616287104371	1
k__Fungi;p__Basidiomycota;c__Tremellomycetes;o__Filobasidiales;f__Filobasidiaceae	D_0__Bacteria;p__Firmicutes;D_2__Clostridia;D_3__Clostridiales;f__Defluviitaleaceae;g__Defluviitaleaceae UCG-011	0.0514331392739122	0.187346553179072	0.856616287104371	1
k__Fungi;p__Ascomycota;c__Eurotiomycetes;o__Eurotiales;f__Trichocomaceae;g__Penicillium	D_0__Bacteria;p__Firmicutes;D_2__Clostridia;D_3__Clostridiales;f__Defluviitaleaceae;g__Defluviitaleaceae UCG-011	0.0519166548051711	0.185106802458847	0.856616287104371	1
k__Fungi;p__Basidiomycota;c__Tremellomycetes;o__Filobasidiales;f__Filobasidiaceae;g__Filobasidium	D_0__Bacteria;p__Firmicutes;D_2__Clostridia;D_3__Clostridiales;f__Defluviitaleaceae;g__Defluviitaleaceae UCG-011	0.0514331392739122	0.187346553179072	0.856616287104371	1
k__Fungi;p__Ascomycota;c__Saccharomycetes;o__Saccharomycetales;f__Incertae sedis;g__Debaryomyces	D_0__Bacteria;p__Firmicutes;D_2__Clostridia;D_3__Clostridiales;f__Family XI;g__Ezakiella	0.05235226821335	0.183103180075438	0.856616287104371	-1
k__Fungi;p__Ascomycota;c__Saccharomycetes;o__Saccharomycetales;f__Saccharomycetaceae	D_0__Bacteria;p__Firmicutes;D_2__Clostridia;D_3__Clostridiales;f__Family XIII;g__[Eubacterium] brachy group	0.0538779502196375	0.176192444518369	0.856616287104371	1
k__Fungi;p__Ascomycota;c__Eurotiomycetes;o__Eurotiales;f__Trichocomaceae	D_0__Bacteria;p__Firmicutes;D_2__Clostridia;D_3__Clostridiales;f__Lachnospiraceae;g__Coprococcus 2	0.0510871420918239	0.188959475096552	0.856616287104371	1
k__Fungi;p__Ascomycota;c__Eurotiomycetes;o__Eurotiales;f__Trichocomaceae;g__Penicillium	D_0__Bacteria;p__Firmicutes;D_2__Clostridia;D_3__Clostridiales;f__Lachnospiraceae;g__Coprococcus 2	0.0510871420918239	0.188959475096552	0.856616287104371	1
k__Fungi;p__Ascomycota;c__Dothideomycetes;o__Pleosporales;f__Pleosporaceae	D_0__Bacteria;p__Firmicutes;D_2__Clostridia;D_3__Clostridiales;f__Lachnospiraceae;g__GCA-900066575	0.0530850888958012	0.179763046351107	0.856616287104371	-1
k__Fungi;p__Ascomycota;c__Dothideomycetes;o__Pleosporales;f__Pleosporaceae;g__Alternaria	D_0__Bacteria;p__Firmicutes;D_2__Clostridia;D_3__Clostridiales;f__Lachnospiraceae;g__GCA-900066575	0.0530850888958012	0.179763046351107	0.856616287104371	-1
k__Fungi;p__Ascomycota;c__Saccharomycetes;o__Saccharomycetales;f__Incertae sedis;g__Debaryomyces	D_0__Bacteria;p__Firmicutes;D_2__Clostridia;D_3__Clostridiales;f__Lachnospiraceae;g__Lachnospiraceae UCG-001	0.0537602924067619	0.176719468505977	0.856616287104371	1
k__Fungi;p__Ascomycota;c__Saccharomycetes;o__Saccharomycetales;f__Incertae sedis;g__Debaryomyces	D_0__Bacteria;p__Firmicutes;D_2__Clostridia;D_3__Clostridiales;f__Lachnospiraceae;g__Tyzzerella 3	0.0536022814061414	0.177428804622262	0.856616287104371	-1
k__Fungi;p__Ascomycota;c__Dothideomycetes;o__Pleosporales;f__Pleosporaceae	D_0__Bacteria;p__Firmicutes;D_2__Clostridia;D_3__Clostridiales;f__Lachnospiraceae;g__[Eubacterium] eligens group	0.0534078591272324	0.178304046930685	0.856616287104371	-1
k__Fungi;p__Ascomycota;c__Dothideomycetes;o__Pleosporales;f__Pleosporaceae;g__Alternaria	D_0__Bacteria;p__Firmicutes;D_2__Clostridia;D_3__Clostridiales;f__Lachnospiraceae;g__[Eubacterium] eligens group	0.0534078591272324	0.178304046930685	0.856616287104371	-1
k__Fungi;p__Ascomycota;c__Saccharomycetes;o__Saccharomycetales;f__Incertae sedis;g__Candida	D_0__Bacteria;p__Firmicutes;D_2__Clostridia;D_3__Clostridiales;f__Peptostreptococcaceae;Other	0.0517993902411362	0.185648471972076	0.856616287104371	-1
k__Fungi;p__Ascomycota;c__Saccharomycetes;o__Saccharomycetales;f__Incertae sedis;g__Debaryomyces	D_0__Bacteria;p__Firmicutes;D_2__Clostridia;D_3__Clostridiales;f__Ruminococcaceae;g__Ruminococcaceae UCG-004	0.0522019687736317	0.183792962576395	0.856616287104371	1
k__Fungi;p__Ascomycota;c__Saccharomycetes;o__Saccharomycetales;f__Incertae sedis;g__Debaryomyces	D_0__Bacteria;p__Firmicutes;D_2__Clostridia;D_3__Clostridiales;f__Ruminococcaceae;g__Ruminococcaceae UCG-005	0.0511833628205619	0.188510074471671	0.856616287104371	-1
k__Fungi;p__Ascomycota;c__Dothideomycetes;o__Pleosporales;f__Pleosporaceae	D_0__Bacteria;p__Firmicutes;D_2__Clostridia;D_3__Clostridiales;f__Ruminococcaceae;g__Ruminococcaceae UCG-013	0.0532878999360569	0.178845422313195	0.856616287104371	-1
k__Fungi;p__Ascomycota;c__Dothideomycetes;o__Pleosporales;f__Pleosporaceae;g__Alternaria	D_0__Bacteria;p__Firmicutes;D_2__Clostridia;D_3__Clostridiales;f__Ruminococcaceae;g__Ruminococcaceae UCG-013	0.0532878999360569	0.178845422313195	0.856616287104371	-1
k__Fungi;p__Ascomycota;c__Eurotiomycetes;o__Eurotiales;f__Trichocomaceae	D_0__Bacteria;p__Firmicutes;D_2__Clostridia;D_3__Clostridiales;f__Ruminococcaceae;g__Ruminococcus 1	0.0547286280269371	0.172411506416561	0.856616287104371	-1
k__Fungi;p__Ascomycota;c__Eurotiomycetes;o__Eurotiales;f__Trichocomaceae;g__Penicillium	D_0__Bacteria;p__Firmicutes;D_2__Clostridia;D_3__Clostridiales;f__Ruminococcaceae;g__Ruminococcus 1	0.0547286280269371	0.172411506416561	0.856616287104371	-1
k__Fungi;p__Ascomycota;c__Dothideomycetes;o__Pleosporales;f__Pleosporaceae	D_0__Bacteria;p__Firmicutes;D_2__Negativicutes;D_3__Selenomonadales;f__Acidaminococcaceae;g__Phascolarctobacterium	0.0512945946528371	0.187991382186028	0.856616287104371	-1
k__Fungi;p__Ascomycota;c__Dothideomycetes;o__Pleosporales;f__Pleosporaceae;g__Alternaria	D_0__Bacteria;p__Firmicutes;D_2__Negativicutes;D_3__Selenomonadales;f__Acidaminococcaceae;g__Phascolarctobacterium	0.0512945946528371	0.187991382186028	0.856616287104371	-1
k__Fungi;p__Ascomycota;c__Saccharomycetes;o__Saccharomycetales;f__Incertae sedis;g__Candida	D_0__Bacteria;p__Proteobacteria;D_2__Deltaproteobacteria;D_3__Desulfovibrionales;f__Desulfovibrionaceae;g__Desulfovibrio	0.0519118716494456	0.185128877727412	0.856616287104371	-1
k__Fungi;p__Ascomycota;c__Sordariomycetes;o__Hypocreales;f__Nectriaceae	D_0__Bacteria;p__Proteobacteria;D_2__Gammaproteobacteria;D_3__Betaproteobacteriales;f__Burkholderiaceae;g__Sutterella	0.0546231546683749	0.172877478609396	0.856616287104371	1
k__Fungi;p__Ascomycota;c__Sordariomycetes;o__Hypocreales;f__Nectriaceae;g__Fusarium	D_0__Bacteria;p__Proteobacteria;D_2__Gammaproteobacteria;D_3__Betaproteobacteriales;f__Burkholderiaceae;g__Sutterella	0.0546231546683749	0.172877478609396	0.856616287104371	1
k__Fungi;p__Ascomycota;c__Saccharomycetes;o__Saccharomycetales;f__Incertae sedis;g__Candida	D_0__Bacteria;p__Proteobacteria;D_2__Gammaproteobacteria;D_3__Enterobacteriales;f__Enterobacteriaceae;g__Escherichia-Shigella	0.0526076496067145	0.18193482601148	0.856616287104371	1
k__Fungi;p__Ascomycota;c__Dothideomycetes;o__Capnodiales;f__Davidiellaceae	D_0__Bacteria;p__Proteobacteria;D_2__Gammaproteobacteria;D_3__Enterobacteriales;f__Enterobacteriaceae;g__Klebsiella	0.0530531260716614	0.179907930992442	0.856616287104371	-1
k__Fungi;p__Ascomycota;c__Dothideomycetes;o__Capnodiales;f__Davidiellaceae;g__Davidiella	D_0__Bacteria;p__Proteobacteria;D_2__Gammaproteobacteria;D_3__Enterobacteriales;f__Enterobacteriaceae;g__Klebsiella	0.0530531260716614	0.179907930992442	0.856616287104371	-1
k__Fungi;p__Ascomycota;c__Saccharomycetes;o__Saccharomycetales;f__Incertae sedis	D_0__Bacteria;Other;Other;Other;Other;Other	0.0519426143566833	0.184987022051848	0.856616287104371	1
k__Fungi;p__Ascomycota;c__Dothideomycetes;o__Pleosporales;f__Pleosporaceae	D_0__Bacteria;p__Firmicutes;D_2__Clostridia;D_3__Clostridiales;f__Lachnospiraceae;g__Coprococcus 3	0.0508674603628751	0.189987960936015	0.858417365026515	-1
k__Fungi;p__Ascomycota;c__Dothideomycetes;o__Pleosporales;f__Pleosporaceae;g__Alternaria	D_0__Bacteria;p__Firmicutes;D_2__Clostridia;D_3__Clostridiales;f__Lachnospiraceae;g__Coprococcus 3	0.0508674603628751	0.189987960936015	0.858417365026515	-1
k__Fungi;p__Ascomycota;c__Dothideomycetes;o__Pleosporales;f__Pleosporaceae	D_0__Bacteria;p__Actinobacteria;D_2__Actinobacteria;D_3__Bifidobacteriales;f__Bifidobacteriaceae	0.0501384750639253	0.193425316230208	0.867891874962154	-1
k__Fungi;p__Ascomycota;c__Dothideomycetes;o__Pleosporales;f__Pleosporaceae;g__Alternaria	D_0__Bacteria;p__Actinobacteria;D_2__Actinobacteria;D_3__Bifidobacteriales;f__Bifidobacteriaceae	0.0501384750639253	0.193425316230208	0.867891874962154	-1
k__Fungi;p__Ascomycota;c__Dothideomycetes;o__Pleosporales;f__Pleosporaceae	D_0__Bacteria;p__Actinobacteria;D_2__Actinobacteria;D_3__Bifidobacteriales;f__Bifidobacteriaceae;g__Bifidobacterium	0.050084717603835	0.193680282390451	0.867891874962154	-1
k__Fungi;p__Ascomycota;c__Dothideomycetes;o__Pleosporales;f__Pleosporaceae;g__Alternaria	D_0__Bacteria;p__Actinobacteria;D_2__Actinobacteria;D_3__Bifidobacteriales;f__Bifidobacteriaceae;g__Bifidobacterium	0.050084717603835	0.193680282390451	0.867891874962154	-1
k__Fungi;p__Ascomycota;c__Saccharomycetes;o__Saccharomycetales;f__Incertae sedis	D_0__Bacteria;p__Firmicutes;D_2__Negativicutes;D_3__Selenomonadales;f__Veillonellaceae;g__Allisonella	0.0500986182182303	0.19361433365435	0.867891874962154	-1
k__Fungi;p__Ascomycota;c__Saccharomycetes;o__Saccharomycetales;f__Saccharomycetaceae	D_0__Bacteria;p__Firmicutes;D_2__Clostridia;D_3__Clostridiales;f__Christensenellaceae	0.049969538919553	0.194227249162471	0.868911377832106	1
k__Fungi;p__Ascomycota;c__Saccharomycetes;o__Saccharomycetales;f__Saccharomycetaceae;g__Saccharomyces	D_0__Bacteria;p__Firmicutes;D_2__Clostridia;D_3__Clostridiales;f__Christensenellaceae;g__Christensenellaceae R-7 group	0.0496388761519671	0.195802711335456	0.874521140939966	1
k__Fungi;p__Ascomycota;c__Sordariomycetes;o__Hypocreales;f__Nectriaceae	D_0__Bacteria;p__Firmicutes;D_2__Bacilli;D_3__Bacillales;f__Family XI	0.0479582729467374	0.203928630340974	0.878370405459738	-1
k__Fungi;p__Ascomycota;c__Sordariomycetes;o__Hypocreales;f__Nectriaceae;g__Fusarium	D_0__Bacteria;p__Firmicutes;D_2__Bacilli;D_3__Bacillales;f__Family XI	0.0479582729467374	0.203928630340974	0.878370405459738	-1
k__Fungi;p__Ascomycota;c__Saccharomycetes;o__Saccharomycetales;f__Incertae sedis;g__Debaryomyces	D_0__Bacteria;p__Firmicutes;D_2__Bacilli;D_3__Lactobacillales;f__Enterococcaceae	0.0479332912436247	0.204050908593484	0.878370405459738	-1
k__Fungi;p__Ascomycota;c__Sordariomycetes;o__Hypocreales;f__Nectriaceae	D_0__Bacteria;p__Firmicutes;D_2__Bacilli;D_3__Bacillales;f__Family XI;g__Gemella	0.0479582729467374	0.203928630340974	0.878370405459738	-1
k__Fungi;p__Ascomycota;c__Sordariomycetes;o__Hypocreales;f__Nectriaceae;g__Fusarium	D_0__Bacteria;p__Firmicutes;D_2__Bacilli;D_3__Bacillales;f__Family XI;g__Gemella	0.0479582729467374	0.203928630340974	0.878370405459738	-1
k__Fungi;p__Ascomycota;c__Saccharomycetes;o__Saccharomycetales;f__Incertae sedis;g__Debaryomyces	D_0__Bacteria;p__Firmicutes;D_2__Bacilli;D_3__Lactobacillales;f__Enterococcaceae;g__Enterococcus	0.0479332912436247	0.204050908593484	0.878370405459738	-1
k__Fungi;p__Ascomycota;c__Saccharomycetes;o__Saccharomycetales;f__Saccharomycetaceae;g__Saccharomyces	D_0__Bacteria;p__Firmicutes;D_2__Bacilli;D_3__Lactobacillales;f__Streptococcaceae;g__Lactococcus	0.0484230449455239	0.201661637664131	0.878370405459738	1
k__Fungi;p__Ascomycota;c__Saccharomycetes;o__Saccharomycetales;f__Saccharomycetaceae	D_0__Bacteria;p__Firmicutes;D_2__Clostridia;D_3__Clostridiales;f__Christensenellaceae;g__Christensenellaceae R-7 group	0.0478589841080363	0.204414877447064	0.878370405459738	1
k__Fungi;p__Ascomycota;c__Saccharomycetes;o__Saccharomycetales;f__Incertae sedis;g__Candida	D_0__Bacteria;p__Firmicutes;D_2__Clostridia;D_3__Clostridiales;f__Family XIII;g__Family XIII UCG-001	0.0481564959922377	0.202959926530451	0.878370405459738	-1
k__Fungi;p__Ascomycota;c__Saccharomycetes;o__Saccharomycetales;f__Incertae sedis;g__Debaryomyces	D_0__Bacteria;p__Firmicutes;D_2__Clostridia;D_3__Clostridiales;f__Family XIII;g__[Eubacterium] nodatum group	0.0488489850571541	0.199597300897185	0.878370405459738	-1
k__Fungi;p__Ascomycota;c__Dothideomycetes;o__Pleosporales;f__Pleosporaceae	D_0__Bacteria;p__Firmicutes;D_2__Clostridia;D_3__Clostridiales;f__Lachnospiraceae;g__Coprococcus 2	0.0484575552574491	0.201493909783705	0.878370405459738	-1
k__Fungi;p__Ascomycota;c__Dothideomycetes;o__Pleosporales;f__Pleosporaceae;g__Alternaria	D_0__Bacteria;p__Firmicutes;D_2__Clostridia;D_3__Clostridiales;f__Lachnospiraceae;g__Coprococcus 2	0.0484575552574491	0.201493909783705	0.878370405459738	-1
k__Fungi;p__Ascomycota;c__Eurotiomycetes;o__Eurotiales;f__Trichocomaceae	D_0__Bacteria;p__Firmicutes;D_2__Clostridia;D_3__Clostridiales;f__Lachnospiraceae;g__GCA-900066575	0.047951728006983	0.203960661738053	0.878370405459738	-1
k__Fungi;p__Ascomycota;c__Eurotiomycetes;o__Eurotiales;f__Trichocomaceae;g__Penicillium	D_0__Bacteria;p__Firmicutes;D_2__Clostridia;D_3__Clostridiales;f__Lachnospiraceae;g__GCA-900066575	0.047951728006983	0.203960661738053	0.878370405459738	-1
k__Fungi;p__Ascomycota;c__Sordariomycetes;o__Hypocreales;f__Cordycipitaceae	D_0__Bacteria;p__Firmicutes;D_2__Clostridia;D_3__Clostridiales;f__Lachnospiraceae;g__[Ruminococcus] torques group	0.0485112995082416	0.201232866316603	0.878370405459738	-1
k__Fungi;p__Ascomycota;c__Sordariomycetes;o__Hypocreales;f__Nectriaceae	D_0__Bacteria;p__Firmicutes;D_2__Clostridia;D_3__Clostridiales;f__Ruminococcaceae;g__Butyricicoccus	0.048048902803457	0.203485388103252	0.878370405459738	-1
k__Fungi;p__Ascomycota;c__Sordariomycetes;o__Hypocreales;f__Nectriaceae;g__Fusarium	D_0__Bacteria;p__Firmicutes;D_2__Clostridia;D_3__Clostridiales;f__Ruminococcaceae;g__Butyricicoccus	0.048048902803457	0.203485388103252	0.878370405459738	-1
k__Fungi;p__Ascomycota;c__Saccharomycetes;o__Saccharomycetales;f__Saccharomycetaceae;g__Saccharomyces	D_0__Bacteria;p__Firmicutes;D_2__Clostridia;D_3__Clostridiales;f__Ruminococcaceae;g__Ruminiclostridium 1	0.0478668579129681	0.204376292022925	0.878370405459738	1
k__Fungi;p__Basidiomycota;c__Tremellomycetes;o__Filobasidiales;f__Filobasidiaceae	D_0__Bacteria;p__Firmicutes;D_2__Clostridia;D_3__Clostridiales;f__Ruminococcaceae;g__Ruminococcaceae UCG-007	0.0486856841012762	0.200387245952348	0.878370405459738	-1
k__Fungi;p__Basidiomycota;c__Tremellomycetes;o__Filobasidiales;f__Filobasidiaceae;g__Filobasidium	D_0__Bacteria;p__Firmicutes;D_2__Clostridia;D_3__Clostridiales;f__Ruminococcaceae;g__Ruminococcaceae UCG-007	0.0486856841012762	0.200387245952348	0.878370405459738	-1
k__Fungi;p__Ascomycota;c__Sordariomycetes;o__Hypocreales;f__Nectriaceae	D_0__Bacteria;p__Firmicutes;D_2__Erysipelotrichia;D_3__Erysipelotrichales;f__Erysipelotrichaceae;g__Holdemanella	0.0485855365279351	0.200872618548449	0.878370405459738	-1
k__Fungi;p__Ascomycota;c__Sordariomycetes;o__Hypocreales;f__Nectriaceae;g__Fusarium	D_0__Bacteria;p__Firmicutes;D_2__Erysipelotrichia;D_3__Erysipelotrichales;f__Erysipelotrichaceae;g__Holdemanella	0.0485855365279351	0.200872618548449	0.878370405459738	-1
k__Fungi;p__Ascomycota;c__Saccharomycetes;o__Saccharomycetales;f__Incertae sedis;g__Candida	D_0__Bacteria;p__Firmicutes;D_2__Negativicutes;D_3__Selenomonadales;f__Veillonellaceae;g__Dialister	0.0481597829307058	0.202943886545378	0.878370405459738	-1
k__Fungi;p__Ascomycota;c__Saccharomycetes;o__Saccharomycetales;f__Saccharomycetaceae;g__Saccharomyces	D_0__Bacteria;p__Proteobacteria;D_2__Gammaproteobacteria;D_3__Betaproteobacteriales;f__Burkholderiaceae;g__Parasutterella	0.0489273405825881	0.199218930123206	0.878370405459738	1
k__Fungi;p__Ascomycota;c__Sordariomycetes;o__Hypocreales;f__Cordycipitaceae	D_0__Bacteria;p__Firmicutes;D_2__Clostridia;D_3__Clostridiales;f__Lachnospiraceae;g__Roseburia	0.0476695847688667	0.205344324558281	0.878966109553268	-1
k__Fungi;p__Ascomycota;c__Eurotiomycetes;o__Eurotiales;f__Trichocomaceae	D_0__Bacteria;p__Firmicutes;D_2__Clostridia;D_3__Clostridiales;f__Ruminococcaceae;g__Ruminiclostridium	0.047633241616056	0.205522957969073	0.878966109553268	1
k__Fungi;p__Ascomycota;c__Eurotiomycetes;o__Eurotiales;f__Trichocomaceae;g__Penicillium	D_0__Bacteria;p__Firmicutes;D_2__Clostridia;D_3__Clostridiales;f__Ruminococcaceae;g__Ruminiclostridium	0.047633241616056	0.205522957969073	0.878966109553268	1
k__Fungi;p__Basidiomycota;c__Tremellomycetes;o__Filobasidiales;f__Filobasidiaceae	D_0__Bacteria;Other;Other;Other;Other	0.0469517341794713	0.208889663695493	0.887781070705844	1
k__Fungi;p__Basidiomycota;c__Tremellomycetes;o__Filobasidiales;f__Filobasidiaceae;g__Filobasidium	D_0__Bacteria;Other;Other;Other;Other	0.0469517341794713	0.208889663695493	0.887781070705844	1
k__Fungi;p__Basidiomycota;c__Tremellomycetes;o__Filobasidiales;f__Filobasidiaceae	D_0__Bacteria;Other;Other;Other;Other;Other	0.0469517341794713	0.208889663695493	0.887781070705844	1
k__Fungi;p__Basidiomycota;c__Tremellomycetes;o__Filobasidiales;f__Filobasidiaceae;g__Filobasidium	D_0__Bacteria;Other;Other;Other;Other;Other	0.0469517341794713	0.208889663695493	0.887781070705844	1
k__Fungi;p__Ascomycota;c__Saccharomycetes;o__Saccharomycetales;f__Incertae sedis	D_0__Bacteria;p__Firmicutes;D_2__Clostridia;D_3__Clostridiales;f__Ruminococcaceae;g__[Eubacterium] coprostanoligenes group	0.0468369920297996	0.20945966248936	0.888814792466549	-1
k__Fungi;p__Ascomycota;c__Saccharomycetes;o__Saccharomycetales;f__Incertae sedis;g__Debaryomyces	D_0__Bacteria;p__Firmicutes;D_2__Clostridia;D_3__Clostridiales;f__Lachnospiraceae;g__[Eubacterium] hallii group	0.0461207508681184	0.213038222662739	0.892856649680507	1
k__Fungi;p__Basidiomycota;c__Tremellomycetes;o__Filobasidiales;f__Filobasidiaceae	D_0__Bacteria;p__Firmicutes;D_2__Clostridia;D_3__Clostridiales;f__Peptostreptococcaceae;Other	0.0461826132046815	0.212727746261079	0.892856649680507	1
k__Fungi;p__Basidiomycota;c__Tremellomycetes;o__Filobasidiales;f__Filobasidiaceae;g__Filobasidium	D_0__Bacteria;p__Firmicutes;D_2__Clostridia;D_3__Clostridiales;f__Peptostreptococcaceae;Other	0.0461826132046815	0.212727746261079	0.892856649680507	1
k__Fungi;p__Ascomycota;c__Sordariomycetes;o__Hypocreales;f__Cordycipitaceae	D_0__Bacteria;p__Firmicutes;D_2__Clostridia;D_3__Clostridiales;f__Ruminococcaceae;g__Ruminiclostridium 1	0.0461918509014387	0.21268140641988	0.892856649680507	1
k__Fungi;p__Ascomycota;c__Saccharomycetes;o__Saccharomycetales;f__Incertae sedis;g__Debaryomyces	D_0__Bacteria;p__Firmicutes;D_2__Clostridia;D_3__Clostridiales;f__Ruminococcaceae;g__Ruminiclostridium 1	0.0463844733608509	0.211716474917319	0.892856649680507	-1
k__Fungi;p__Ascomycota;c__Sordariomycetes;o__Hypocreales;f__Cordycipitaceae	D_0__Bacteria;p__Firmicutes;D_2__Clostridia;D_3__Clostridiales;f__Ruminococcaceae;g__Ruminococcaceae UCG-004	0.0465684266210499	0.210797355435663	0.892856649680507	-1
k__Fungi;p__Ascomycota;c__Dothideomycetes;o__Pleosporales;f__Pleosporaceae	D_0__Bacteria;p__Firmicutes;D_2__Erysipelotrichia;D_3__Erysipelotrichales;f__Erysipelotrichaceae;g__Holdemanella	0.0461537416333525	0.212872614977675	0.892856649680507	1
k__Fungi;p__Ascomycota;c__Dothideomycetes;o__Pleosporales;f__Pleosporaceae;g__Alternaria	D_0__Bacteria;p__Firmicutes;D_2__Erysipelotrichia;D_3__Erysipelotrichales;f__Erysipelotrichaceae;g__Holdemanella	0.0461537416333525	0.212872614977675	0.892856649680507	1
k__Fungi;p__Ascomycota;c__Saccharomycetes;o__Saccharomycetales;f__Incertae sedis;g__Debaryomyces	D_0__Bacteria;p__Proteobacteria;D_2__Gammaproteobacteria;D_3__Enterobacteriales;f__Enterobacteriaceae	0.0459115311632373	0.214090207437474	0.895885175738354	-1
k__Fungi;p__Ascomycota;c__Saccharomycetes;o__Saccharomycetales;f__Incertae sedis	D_0__Bacteria;p__Firmicutes;D_2__Negativicutes;D_3__Selenomonadales;f__Acidaminococcaceae	0.045382818965391	0.216762008546424	0.901517833709897	-1
k__Fungi;p__Ascomycota;c__Dothideomycetes;o__Pleosporales;f__Pleosporaceae	D_0__Bacteria;p__Firmicutes;D_2__Clostridia;D_3__Clostridiales;f__Lachnospiraceae;g__Lachnoclostridium	0.0454487377555484	0.216427850593926	0.901517833709897	-1
k__Fungi;p__Ascomycota;c__Dothideomycetes;o__Pleosporales;f__Pleosporaceae;g__Alternaria	D_0__Bacteria;p__Firmicutes;D_2__Clostridia;D_3__Clostridiales;f__Lachnospiraceae;g__Lachnoclostridium	0.0454487377555484	0.216427850593926	0.901517833709897	-1
k__Fungi;p__Ascomycota;c__Saccharomycetes;o__Saccharomycetales;f__Incertae sedis	D_0__Bacteria;p__Firmicutes;D_2__Negativicutes;D_3__Selenomonadales;f__Acidaminococcaceae;g__Phascolarctobacterium	0.045382818965391	0.216762008546424	0.901517833709897	-1
k__Fungi;p__Ascomycota;c__Sordariomycetes;o__Hypocreales;f__Cordycipitaceae	D_0__Bacteria;p__Firmicutes;D_2__Erysipelotrichia;D_3__Erysipelotrichales;f__Erysipelotrichaceae	0.0451696752418045	0.217844513961452	0.904636760267404	-1
k__Fungi;p__Ascomycota;c__Saccharomycetes;o__Saccharomycetales;f__Saccharomycetaceae	D_0__Bacteria;Other;Other;Other;Other	0.0449511486774474	0.218957571349336	0.906491010761332	-1
k__Fungi;p__Ascomycota;c__Saccharomycetes;o__Saccharomycetales;f__Saccharomycetaceae	D_0__Bacteria;Other;Other;Other;Other;Other	0.0449511486774474	0.218957571349336	0.906491010761332	-1
k__Fungi;p__Ascomycota;c__Saccharomycetes;o__Saccharomycetales;f__Incertae sedis;g__Debaryomyces	D_0__Bacteria;p__Actinobacteria;D_2__Coriobacteriia;D_3__Coriobacteriales;f__Atopobiaceae	0.0448425091666944	0.21951213188497	0.907122623718163	-1
k__Fungi;p__Ascomycota;c__Sordariomycetes;o__Hypocreales;f__Cordycipitaceae	D_0__Bacteria;p__Actinobacteria;D_2__Coriobacteriia;D_3__Coriobacteriales;f__Atopobiaceae;g__Olsenella	0.044790649798595	0.219777135672893	0.907122623718163	-1
k__Fungi;p__Ascomycota;c__Eurotiomycetes;o__Eurotiales;f__Trichocomaceae	D_0__Archaea;p__Euryarchaeota;D_2__Methanobacteria;D_3__Methanobacteriales;f__Methanobacteriaceae	-0.0414995509007742	0.763035548572611	0.912548797270739	1
k__Fungi;p__Ascomycota;c__Saccharomycetes;o__Saccharomycetales;f__Saccharomycetaceae	D_0__Archaea;p__Euryarchaeota;D_2__Methanobacteria;D_3__Methanobacteriales;f__Methanobacteriaceae	0.0280276640132715	0.314362651537354	0.912548797270739	1
k__Fungi;p__Ascomycota;c__Sordariomycetes;o__Hypocreales;f__Cordycipitaceae	D_0__Archaea;p__Euryarchaeota;D_2__Methanobacteria;D_3__Methanobacteriales;f__Methanobacteriaceae	-0.0581148393350205	0.8421237299573	0.912548797270739	1
k__Fungi;p__Basidiomycota;c__Tremellomycetes;o__Filobasidiales;f__Filobasidiaceae	D_0__Archaea;p__Euryarchaeota;D_2__Methanobacteria;D_3__Methanobacteriales;f__Methanobacteriaceae	0.00815448976525649	0.44407219098183	0.912548797270739	-1
k__Fungi;p__Ascomycota;c__Eurotiomycetes;o__Eurotiales;f__Trichocomaceae;g__Penicillium	D_0__Archaea;p__Euryarchaeota;D_2__Methanobacteria;D_3__Methanobacteriales;f__Methanobacteriaceae	-0.0414995509007742	0.763035548572611	0.912548797270739	1
k__Fungi;p__Ascomycota;c__Saccharomycetes;o__Saccharomycetales;f__Incertae sedis;g__Candida	D_0__Archaea;p__Euryarchaeota;D_2__Methanobacteria;D_3__Methanobacteriales;f__Methanobacteriaceae	0.0063254057306325	0.456560414428683	0.912548797270739	1
k__Fungi;p__Ascomycota;c__Saccharomycetes;o__Saccharomycetales;f__Incertae sedis;g__Debaryomyces	D_0__Archaea;p__Euryarchaeota;D_2__Methanobacteria;D_3__Methanobacteriales;f__Methanobacteriaceae	0.0167612109911671	0.386244376129104	0.912548797270739	1
k__Fungi;p__Ascomycota;c__Saccharomycetes;o__Saccharomycetales;f__Saccharomycetaceae;g__Saccharomyces	D_0__Archaea;p__Euryarchaeota;D_2__Methanobacteria;D_3__Methanobacteriales;f__Methanobacteriaceae	0.0278477325325323	0.315465645748744	0.912548797270739	1
k__Fungi;p__Basidiomycota;c__Tremellomycetes;o__Filobasidiales;f__Filobasidiaceae;g__Filobasidium	D_0__Archaea;p__Euryarchaeota;D_2__Methanobacteria;D_3__Methanobacteriales;f__Methanobacteriaceae	0.00815448976525649	0.44407219098183	0.912548797270739	-1
k__Fungi;p__Ascomycota;c__Dothideomycetes;o__Capnodiales;f__Davidiellaceae	D_0__Bacteria;p__Actinobacteria;D_2__Actinobacteria;D_3__Actinomycetales;f__Actinomycetaceae	-0.0510374860048851	0.810808348593789	0.912548797270739	1
k__Fungi;p__Ascomycota;c__Dothideomycetes;o__Pleosporales;f__Pleosporaceae	D_0__Bacteria;p__Actinobacteria;D_2__Actinobacteria;D_3__Actinomycetales;f__Actinomycetaceae	-0.0218374862159174	0.646802561899004	0.912548797270739	1
k__Fungi;p__Ascomycota;c__Eurotiomycetes;o__Eurotiales;f__Trichocomaceae	D_0__Bacteria;p__Actinobacteria;D_2__Actinobacteria;D_3__Actinomycetales;f__Actinomycetaceae	0.00869960385074194	0.440360472725918	0.912548797270739	1
k__Fungi;p__Ascomycota;c__Saccharomycetes;o__Saccharomycetales;f__Incertae sedis	D_0__Bacteria;p__Actinobacteria;D_2__Actinobacteria;D_3__Actinomycetales;f__Actinomycetaceae	-0.0153605990088795	0.604479217083327	0.912548797270739	1
k__Fungi;p__Ascomycota;c__Saccharomycetes;o__Saccharomycetales;f__Saccharomycetaceae	D_0__Bacteria;p__Actinobacteria;D_2__Actinobacteria;D_3__Actinomycetales;f__Actinomycetaceae	-0.0504722226033856	0.808153050865616	0.912548797270739	1
k__Fungi;p__Basidiomycota;c__Tremellomycetes;o__Filobasidiales;f__Filobasidiaceae	D_0__Bacteria;p__Actinobacteria;D_2__Actinobacteria;D_3__Actinomycetales;f__Actinomycetaceae	-0.0105782765789102	0.572389654856895	0.912548797270739	1
k__Fungi;p__Ascomycota;c__Dothideomycetes;o__Capnodiales;f__Davidiellaceae;g__Davidiella	D_0__Bacteria;p__Actinobacteria;D_2__Actinobacteria;D_3__Actinomycetales;f__Actinomycetaceae	-0.0510374860048851	0.810808348593789	0.912548797270739	1
k__Fungi;p__Ascomycota;c__Dothideomycetes;o__Pleosporales;f__Pleosporaceae;g__Alternaria	D_0__Bacteria;p__Actinobacteria;D_2__Actinobacteria;D_3__Actinomycetales;f__Actinomycetaceae	-0.0218374862159174	0.646802561899004	0.912548797270739	1
k__Fungi;p__Ascomycota;c__Eurotiomycetes;o__Eurotiales;f__Trichocomaceae;g__Penicillium	D_0__Bacteria;p__Actinobacteria;D_2__Actinobacteria;D_3__Actinomycetales;f__Actinomycetaceae	0.00869960385074194	0.440360472725918	0.912548797270739	1
k__Fungi;p__Ascomycota;c__Saccharomycetes;o__Saccharomycetales;f__Incertae sedis;g__Candida	D_0__Bacteria;p__Actinobacteria;D_2__Actinobacteria;D_3__Actinomycetales;f__Actinomycetaceae	-0.0420430846224693	0.765923772243325	0.912548797270739	1
k__Fungi;p__Ascomycota;c__Saccharomycetes;o__Saccharomycetales;f__Incertae sedis;g__Debaryomyces	D_0__Bacteria;p__Actinobacteria;D_2__Actinobacteria;D_3__Actinomycetales;f__Actinomycetaceae	-0.0254033102583066	0.669390987486048	0.912548797270739	-1
k__Fungi;p__Ascomycota;c__Saccharomycetes;o__Saccharomycetales;f__Saccharomycetaceae;g__Saccharomyces	D_0__Bacteria;p__Actinobacteria;D_2__Actinobacteria;D_3__Actinomycetales;f__Actinomycetaceae	-0.0477069796081479	0.794839382275901	0.912548797270739	1
k__Fungi;p__Basidiomycota;c__Tremellomycetes;o__Filobasidiales;f__Filobasidiaceae;g__Filobasidium	D_0__Bacteria;p__Actinobacteria;D_2__Actinobacteria;D_3__Actinomycetales;f__Actinomycetaceae	-0.0105782765789102	0.572389654856895	0.912548797270739	1
k__Fungi;p__Ascomycota;c__Eurotiomycetes;o__Eurotiales;f__Trichocomaceae	D_0__Bacteria;p__Actinobacteria;D_2__Actinobacteria;D_3__Bifidobacteriales;f__Bifidobacteriaceae	-0.040973027169032	0.760219229825465	0.912548797270739	1
k__Fungi;p__Ascomycota;c__Saccharomycetes;o__Saccharomycetales;f__Saccharomycetaceae	D_0__Bacteria;p__Actinobacteria;D_2__Actinobacteria;D_3__Bifidobacteriales;f__Bifidobacteriaceae	-0.0303964803287797	0.700001832848018	0.912548797270739	-1
k__Fungi;p__Basidiomycota;c__Tremellomycetes;o__Filobasidiales;f__Filobasidiaceae	D_0__Bacteria;p__Actinobacteria;D_2__Actinobacteria;D_3__Bifidobacteriales;f__Bifidobacteriaceae	-0.0599425737121434	0.849626389924812	0.912548797270739	1
k__Fungi;p__Ascomycota;c__Eurotiomycetes;o__Eurotiales;f__Trichocomaceae;g__Penicillium	D_0__Bacteria;p__Actinobacteria;D_2__Actinobacteria;D_3__Bifidobacteriales;f__Bifidobacteriaceae	-0.040973027169032	0.760219229825465	0.912548797270739	1
k__Fungi;p__Ascomycota;c__Saccharomycetes;o__Saccharomycetales;f__Incertae sedis;g__Candida	D_0__Bacteria;p__Actinobacteria;D_2__Actinobacteria;D_3__Bifidobacteriales;f__Bifidobacteriaceae	-0.0355643821528653	0.730265362982587	0.912548797270739	1
k__Fungi;p__Ascomycota;c__Saccharomycetes;o__Saccharomycetales;f__Saccharomycetaceae;g__Saccharomyces	D_0__Bacteria;p__Actinobacteria;D_2__Actinobacteria;D_3__Bifidobacteriales;f__Bifidobacteriaceae	-0.031601314756546	0.707192704007663	0.912548797270739	-1
k__Fungi;p__Basidiomycota;c__Tremellomycetes;o__Filobasidiales;f__Filobasidiaceae;g__Filobasidium	D_0__Bacteria;p__Actinobacteria;D_2__Actinobacteria;D_3__Bifidobacteriales;f__Bifidobacteriaceae	-0.0599425737121434	0.849626389924812	0.912548797270739	1
k__Fungi;p__Ascomycota;c__Dothideomycetes;o__Pleosporales;f__Pleosporaceae	D_0__Bacteria;p__Actinobacteria;D_2__Actinobacteria;D_3__Propionibacteriales;f__Propionibacteriaceae	-0.0229142613506179	0.653682492171978	0.912548797270739	1
k__Fungi;p__Ascomycota;c__Eurotiomycetes;o__Eurotiales;f__Trichocomaceae	D_0__Bacteria;p__Actinobacteria;D_2__Actinobacteria;D_3__Propionibacteriales;f__Propionibacteriaceae	-0.0146535093941362	0.599773253383408	0.912548797270739	1
k__Fungi;p__Ascomycota;c__Saccharomycetes;o__Saccharomycetales;f__Incertae sedis	D_0__Bacteria;p__Actinobacteria;D_2__Actinobacteria;D_3__Propionibacteriales;f__Propionibacteriaceae	0.00909756555148053	0.43765399500908	0.912548797270739	-1
k__Fungi;p__Ascomycota;c__Saccharomycetes;o__Saccharomycetales;f__Saccharomycetaceae	D_0__Bacteria;p__Actinobacteria;D_2__Actinobacteria;D_3__Propionibacteriales;f__Propionibacteriaceae	0.0195126691956465	0.368212816244055	0.912548797270739	1
k__Fungi;p__Ascomycota;c__Sordariomycetes;o__Hypocreales;f__Cordycipitaceae	D_0__Bacteria;p__Actinobacteria;D_2__Actinobacteria;D_3__Propionibacteriales;f__Propionibacteriaceae	-0.0578274021704672	0.840921949321496	0.912548797270739	1
k__Fungi;p__Ascomycota;c__Sordariomycetes;o__Hypocreales;f__Nectriaceae	D_0__Bacteria;p__Actinobacteria;D_2__Actinobacteria;D_3__Propionibacteriales;f__Propionibacteriaceae	-0.0168486884238186	0.614332915756408	0.912548797270739	-1
k__Fungi;p__Ascomycota;c__Dothideomycetes;o__Pleosporales;f__Pleosporaceae;g__Alternaria	D_0__Bacteria;p__Actinobacteria;D_2__Actinobacteria;D_3__Propionibacteriales;f__Propionibacteriaceae	-0.0229142613506179	0.653682492171978	0.912548797270739	1
k__Fungi;p__Ascomycota;c__Eurotiomycetes;o__Eurotiales;f__Trichocomaceae;g__Penicillium	D_0__Bacteria;p__Actinobacteria;D_2__Actinobacteria;D_3__Propionibacteriales;f__Propionibacteriaceae	-0.0146535093941362	0.599773253383408	0.912548797270739	1
k__Fungi;p__Ascomycota;c__Saccharomycetes;o__Saccharomycetales;f__Incertae sedis;g__Candida	D_0__Bacteria;p__Actinobacteria;D_2__Actinobacteria;D_3__Propionibacteriales;f__Propionibacteriaceae	0.0255058874836037	0.329967736851443	0.912548797270739	1
k__Fungi;p__Ascomycota;c__Saccharomycetes;o__Saccharomycetales;f__Incertae sedis;g__Debaryomyces	D_0__Bacteria;p__Actinobacteria;D_2__Actinobacteria;D_3__Propionibacteriales;f__Propionibacteriaceae	-0.0157213315058172	0.606874256476561	0.912548797270739	1
k__Fungi;p__Ascomycota;c__Saccharomycetes;o__Saccharomycetales;f__Saccharomycetaceae;g__Saccharomyces	D_0__Bacteria;p__Actinobacteria;D_2__Actinobacteria;D_3__Propionibacteriales;f__Propionibacteriaceae	0.0177186448205845	0.37993986189553	0.912548797270739	1
k__Fungi;p__Ascomycota;c__Sordariomycetes;o__Hypocreales;f__Nectriaceae;g__Fusarium	D_0__Bacteria;p__Actinobacteria;D_2__Actinobacteria;D_3__Propionibacteriales;f__Propionibacteriaceae	-0.0168486884238186	0.614332915756408	0.912548797270739	-1
k__Fungi;p__Ascomycota;c__Dothideomycetes;o__Capnodiales;f__Davidiellaceae	D_0__Bacteria;p__Actinobacteria;D_2__Coriobacteriia;D_3__Coriobacteriales;f__Atopobiaceae	-0.0339521573997671	0.720989169825653	0.912548797270739	1
k__Fungi;p__Ascomycota;c__Dothideomycetes;o__Pleosporales;f__Pleosporaceae	D_0__Bacteria;p__Actinobacteria;D_2__Coriobacteriia;D_3__Coriobacteriales;f__Atopobiaceae	-0.0235642847879122	0.657811623302497	0.912548797270739	1
k__Fungi;p__Ascomycota;c__Saccharomycetes;o__Saccharomycetales;f__Incertae sedis	D_0__Bacteria;p__Actinobacteria;D_2__Coriobacteriia;D_3__Coriobacteriales;f__Atopobiaceae	-0.00538601009383834	0.537008360429344	0.912548797270739	-1
k__Fungi;p__Basidiomycota;c__Tremellomycetes;o__Filobasidiales;f__Filobasidiaceae	D_0__Bacteria;p__Actinobacteria;D_2__Coriobacteriia;D_3__Coriobacteriales;f__Atopobiaceae	-0.00711825782703257	0.548858826798075	0.912548797270739	1
k__Fungi;p__Ascomycota;c__Dothideomycetes;o__Capnodiales;f__Davidiellaceae;g__Davidiella	D_0__Bacteria;p__Actinobacteria;D_2__Coriobacteriia;D_3__Coriobacteriales;f__Atopobiaceae	-0.0339521573997671	0.720989169825653	0.912548797270739	1
k__Fungi;p__Ascomycota;c__Dothideomycetes;o__Pleosporales;f__Pleosporaceae;g__Alternaria	D_0__Bacteria;p__Actinobacteria;D_2__Coriobacteriia;D_3__Coriobacteriales;f__Atopobiaceae	-0.0235642847879122	0.657811623302497	0.912548797270739	1
k__Fungi;p__Ascomycota;c__Saccharomycetes;o__Saccharomycetales;f__Incertae sedis;g__Candida	D_0__Bacteria;p__Actinobacteria;D_2__Coriobacteriia;D_3__Coriobacteriales;f__Atopobiaceae	-0.036055208807799	0.733058582418743	0.912548797270739	1
k__Fungi;p__Basidiomycota;c__Tremellomycetes;o__Filobasidiales;f__Filobasidiaceae;g__Filobasidium	D_0__Bacteria;p__Actinobacteria;D_2__Coriobacteriia;D_3__Coriobacteriales;f__Atopobiaceae	-0.00711825782703257	0.548858826798075	0.912548797270739	1
k__Fungi;p__Ascomycota;c__Dothideomycetes;o__Capnodiales;f__Davidiellaceae	D_0__Bacteria;p__Actinobacteria;D_2__Coriobacteriia;D_3__Coriobacteriales;f__Coriobacteriaceae	-0.024152769060227	0.661533733353872	0.912548797270739	-1
k__Fungi;p__Ascomycota;c__Dothideomycetes;o__Pleosporales;f__Pleosporaceae	D_0__Bacteria;p__Actinobacteria;D_2__Coriobacteriia;D_3__Coriobacteriales;f__Coriobacteriaceae	0.0428478631882469	0.229835658857788	0.912548797270739	-1
k__Fungi;p__Ascomycota;c__Eurotiomycetes;o__Eurotiales;f__Trichocomaceae	D_0__Bacteria;p__Actinobacteria;D_2__Coriobacteriia;D_3__Coriobacteriales;f__Coriobacteriaceae	-0.0660473061157318	0.872949072315001	0.912548797270739	1
k__Fungi;p__Ascomycota;c__Saccharomycetes;o__Saccharomycetales;f__Incertae sedis	D_0__Bacteria;p__Actinobacteria;D_2__Coriobacteriia;D_3__Coriobacteriales;f__Coriobacteriaceae	-0.0180354403809126	0.622139295784447	0.912548797270739	-1
k__Fungi;p__Ascomycota;c__Saccharomycetes;o__Saccharomycetales;f__Saccharomycetaceae	D_0__Bacteria;p__Actinobacteria;D_2__Coriobacteriia;D_3__Coriobacteriales;f__Coriobacteriaceae	0.000186419597547619	0.498717242156005	0.912548797270739	1
k__Fungi;p__Basidiomycota;c__Tremellomycetes;o__Filobasidiales;f__Filobasidiaceae	D_0__Bacteria;p__Actinobacteria;D_2__Coriobacteriia;D_3__Coriobacteriales;f__Coriobacteriaceae	0.0391518251822974	0.249660783501853	0.912548797270739	1
k__Fungi;p__Ascomycota;c__Dothideomycetes;o__Capnodiales;f__Davidiellaceae;g__Davidiella	D_0__Bacteria;p__Actinobacteria;D_2__Coriobacteriia;D_3__Coriobacteriales;f__Coriobacteriaceae	-0.024152769060227	0.661533733353872	0.912548797270739	-1
k__Fungi;p__Ascomycota;c__Dothideomycetes;o__Pleosporales;f__Pleosporaceae;g__Alternaria	D_0__Bacteria;p__Actinobacteria;D_2__Coriobacteriia;D_3__Coriobacteriales;f__Coriobacteriaceae	0.0428478631882469	0.229835658857788	0.912548797270739	-1
k__Fungi;p__Ascomycota;c__Eurotiomycetes;o__Eurotiales;f__Trichocomaceae;g__Penicillium	D_0__Bacteria;p__Actinobacteria;D_2__Coriobacteriia;D_3__Coriobacteriales;f__Coriobacteriaceae	-0.0660473061157318	0.872949072315001	0.912548797270739	1
k__Fungi;p__Ascomycota;c__Saccharomycetes;o__Saccharomycetales;f__Incertae sedis;g__Candida	D_0__Bacteria;p__Actinobacteria;D_2__Coriobacteriia;D_3__Coriobacteriales;f__Coriobacteriaceae	-0.046287244213028	0.787796780053429	0.912548797270739	-1
k__Fungi;p__Ascomycota;c__Saccharomycetes;o__Saccharomycetales;f__Incertae sedis;g__Debaryomyces	D_0__Bacteria;p__Actinobacteria;D_2__Coriobacteriia;D_3__Coriobacteriales;f__Coriobacteriaceae	-0.0309039807713011	0.703040464556467	0.912548797270739	1
k__Fungi;p__Ascomycota;c__Saccharomycetes;o__Saccharomycetales;f__Saccharomycetaceae;g__Saccharomyces	D_0__Bacteria;p__Actinobacteria;D_2__Coriobacteriia;D_3__Coriobacteriales;f__Coriobacteriaceae	-0.00301214438955358	0.520717401705921	0.912548797270739	1
k__Fungi;p__Basidiomycota;c__Tremellomycetes;o__Filobasidiales;f__Filobasidiaceae;g__Filobasidium	D_0__Bacteria;p__Actinobacteria;D_2__Coriobacteriia;D_3__Coriobacteriales;f__Coriobacteriaceae	0.0391518251822974	0.249660783501853	0.912548797270739	1
k__Fungi;p__Ascomycota;c__Dothideomycetes;o__Capnodiales;f__Davidiellaceae	D_0__Bacteria;p__Actinobacteria;D_2__Coriobacteriia;D_3__Coriobacteriales;f__Coriobacteriales Incertae Sedis	0.0214253982754687	0.355843257240769	0.912548797270739	1
k__Fungi;p__Ascomycota;c__Dothideomycetes;o__Pleosporales;f__Pleosporaceae	D_0__Bacteria;p__Actinobacteria;D_2__Coriobacteriia;D_3__Coriobacteriales;f__Coriobacteriales Incertae Sedis	-0.00420863513385725	0.528934485771128	0.912548797270739	1
k__Fungi;p__Ascomycota;c__Eurotiomycetes;o__Eurotiales;f__Trichocomaceae	D_0__Bacteria;p__Actinobacteria;D_2__Coriobacteriia;D_3__Coriobacteriales;f__Coriobacteriales Incertae Sedis	-0.0564170106901417	0.834938902067762	0.912548797270739	1
k__Fungi;p__Ascomycota;c__Saccharomycetes;o__Saccharomycetales;f__Incertae sedis	D_0__Bacteria;p__Actinobacteria;D_2__Coriobacteriia;D_3__Coriobacteriales;f__Coriobacteriales Incertae Sedis	-0.0317971322230353	0.70835384763229	0.912548797270739	-1
k__Fungi;p__Ascomycota;c__Saccharomycetes;o__Saccharomycetales;f__Saccharomycetaceae	D_0__Bacteria;p__Actinobacteria;D_2__Coriobacteriia;D_3__Coriobacteriales;f__Coriobacteriales Incertae Sedis	-0.0259406521537105	0.672744720490486	0.912548797270739	1
k__Fungi;p__Basidiomycota;c__Tremellomycetes;o__Filobasidiales;f__Filobasidiaceae	D_0__Bacteria;p__Actinobacteria;D_2__Coriobacteriia;D_3__Coriobacteriales;f__Coriobacteriales Incertae Sedis	-0.0301573765058349	0.698565377294875	0.912548797270739	1
k__Fungi;p__Ascomycota;c__Dothideomycetes;o__Capnodiales;f__Davidiellaceae;g__Davidiella	D_0__Bacteria;p__Actinobacteria;D_2__Coriobacteriia;D_3__Coriobacteriales;f__Coriobacteriales Incertae Sedis	0.0214253982754687	0.355843257240769	0.912548797270739	1
k__Fungi;p__Ascomycota;c__Dothideomycetes;o__Pleosporales;f__Pleosporaceae;g__Alternaria	D_0__Bacteria;p__Actinobacteria;D_2__Coriobacteriia;D_3__Coriobacteriales;f__Coriobacteriales Incertae Sedis	-0.00420863513385725	0.528934485771128	0.912548797270739	1
k__Fungi;p__Ascomycota;c__Eurotiomycetes;o__Eurotiales;f__Trichocomaceae;g__Penicillium	D_0__Bacteria;p__Actinobacteria;D_2__Coriobacteriia;D_3__Coriobacteriales;f__Coriobacteriales Incertae Sedis	-0.0564170106901417	0.834938902067762	0.912548797270739	1
k__Fungi;p__Ascomycota;c__Saccharomycetes;o__Saccharomycetales;f__Incertae sedis;g__Candida	D_0__Bacteria;p__Actinobacteria;D_2__Coriobacteriia;D_3__Coriobacteriales;f__Coriobacteriales Incertae Sedis	0.00951085416837057	0.434846351658203	0.912548797270739	-1
k__Fungi;p__Ascomycota;c__Saccharomycetes;o__Saccharomycetales;f__Incertae sedis;g__Debaryomyces	D_0__Bacteria;p__Actinobacteria;D_2__Coriobacteriia;D_3__Coriobacteriales;f__Coriobacteriales Incertae Sedis	-0.00983684649778673	0.567365954750161	0.912548797270739	1
k__Fungi;p__Ascomycota;c__Saccharomycetes;o__Saccharomycetales;f__Saccharomycetaceae;g__Saccharomyces	D_0__Bacteria;p__Actinobacteria;D_2__Coriobacteriia;D_3__Coriobacteriales;f__Coriobacteriales Incertae Sedis	-0.025734361414885	0.671458811622937	0.912548797270739	1
k__Fungi;p__Basidiomycota;c__Tremellomycetes;o__Filobasidiales;f__Filobasidiaceae;g__Filobasidium	D_0__Bacteria;p__Actinobacteria;D_2__Coriobacteriia;D_3__Coriobacteriales;f__Coriobacteriales Incertae Sedis	-0.0301573765058349	0.698565377294875	0.912548797270739	1
k__Fungi;p__Ascomycota;c__Dothideomycetes;o__Capnodiales;f__Davidiellaceae	D_0__Bacteria;p__Actinobacteria;D_2__Coriobacteriia;D_3__Coriobacteriales;f__Eggerthellaceae	-0.0281942100676794	0.686656821757416	0.912548797270739	1
k__Fungi;p__Ascomycota;c__Dothideomycetes;o__Pleosporales;f__Pleosporaceae	D_0__Bacteria;p__Actinobacteria;D_2__Coriobacteriia;D_3__Coriobacteriales;f__Eggerthellaceae	0.00190250708292547	0.486911116684461	0.912548797270739	1
k__Fungi;p__Ascomycota;c__Eurotiomycetes;o__Eurotiales;f__Trichocomaceae	D_0__Bacteria;p__Actinobacteria;D_2__Coriobacteriia;D_3__Coriobacteriales;f__Eggerthellaceae	-0.0061252366413932	0.542070093147004	0.912548797270739	-1
k__Fungi;p__Basidiomycota;c__Tremellomycetes;o__Filobasidiales;f__Filobasidiaceae	D_0__Bacteria;p__Actinobacteria;D_2__Coriobacteriia;D_3__Coriobacteriales;f__Eggerthellaceae	-0.0634347854715205	0.863294095057941	0.912548797270739	1
k__Fungi;p__Ascomycota;c__Dothideomycetes;o__Capnodiales;f__Davidiellaceae;g__Davidiella	D_0__Bacteria;p__Actinobacteria;D_2__Coriobacteriia;D_3__Coriobacteriales;f__Eggerthellaceae	-0.0281942100676794	0.686656821757416	0.912548797270739	1
k__Fungi;p__Ascomycota;c__Dothideomycetes;o__Pleosporales;f__Pleosporaceae;g__Alternaria	D_0__Bacteria;p__Actinobacteria;D_2__Coriobacteriia;D_3__Coriobacteriales;f__Eggerthellaceae	0.00190250708292547	0.486911116684461	0.912548797270739	1
k__Fungi;p__Ascomycota;c__Eurotiomycetes;o__Eurotiales;f__Trichocomaceae;g__Penicillium	D_0__Bacteria;p__Actinobacteria;D_2__Coriobacteriia;D_3__Coriobacteriales;f__Eggerthellaceae	-0.0061252366413932	0.542070093147004	0.912548797270739	-1
k__Fungi;p__Ascomycota;c__Saccharomycetes;o__Saccharomycetales;f__Incertae sedis;g__Candida	D_0__Bacteria;p__Actinobacteria;D_2__Coriobacteriia;D_3__Coriobacteriales;f__Eggerthellaceae	-0.044391099595031	0.778175026660059	0.912548797270739	-1
k__Fungi;p__Basidiomycota;c__Tremellomycetes;o__Filobasidiales;f__Filobasidiaceae;g__Filobasidium	D_0__Bacteria;p__Actinobacteria;D_2__Coriobacteriia;D_3__Coriobacteriales;f__Eggerthellaceae	-0.0634347854715205	0.863294095057941	0.912548797270739	1
k__Fungi;p__Ascomycota;c__Dothideomycetes;o__Capnodiales;f__Davidiellaceae	D_0__Bacteria;p__Actinobacteria;D_2__Coriobacteriia;D_3__Coriobacteriales;f__uncultured	-0.00365059539766719	0.525103374387896	0.912548797270739	1
k__Fungi;p__Ascomycota;c__Dothideomycetes;o__Pleosporales;f__Pleosporaceae	D_0__Bacteria;p__Actinobacteria;D_2__Coriobacteriia;D_3__Coriobacteriales;f__uncultured	0.00313208860944901	0.478458409936359	0.912548797270739	-1
k__Fungi;p__Ascomycota;c__Saccharomycetes;o__Saccharomycetales;f__Incertae sedis	D_0__Bacteria;p__Actinobacteria;D_2__Coriobacteriia;D_3__Coriobacteriales;f__uncultured	0.0331917547599832	0.283438865364241	0.912548797270739	1
k__Fungi;p__Ascomycota;c__Sordariomycetes;o__Hypocreales;f__Cordycipitaceae	D_0__Bacteria;p__Actinobacteria;D_2__Coriobacteriia;D_3__Coriobacteriales;f__uncultured	0.035685343410101	0.269044914877512	0.912548797270739	-1
k__Fungi;p__Ascomycota;c__Sordariomycetes;o__Hypocreales;f__Nectriaceae	D_0__Bacteria;p__Actinobacteria;D_2__Coriobacteriia;D_3__Coriobacteriales;f__uncultured	0.0173824012413405	0.382150440877751	0.912548797270739	-1
k__Fungi;p__Basidiomycota;c__Tremellomycetes;o__Filobasidiales;f__Filobasidiaceae	D_0__Bacteria;p__Actinobacteria;D_2__Coriobacteriia;D_3__Coriobacteriales;f__uncultured	-0.00309720931036302	0.521301928682848	0.912548797270739	1
k__Fungi;p__Ascomycota;c__Dothideomycetes;o__Capnodiales;f__Davidiellaceae;g__Davidiella	D_0__Bacteria;p__Actinobacteria;D_2__Coriobacteriia;D_3__Coriobacteriales;f__uncultured	-0.00365059539766719	0.525103374387896	0.912548797270739	1
k__Fungi;p__Ascomycota;c__Dothideomycetes;o__Pleosporales;f__Pleosporaceae;g__Alternaria	D_0__Bacteria;p__Actinobacteria;D_2__Coriobacteriia;D_3__Coriobacteriales;f__uncultured	0.00313208860944901	0.478458409936359	0.912548797270739	-1
k__Fungi;p__Ascomycota;c__Saccharomycetes;o__Saccharomycetales;f__Incertae sedis;g__Candida	D_0__Bacteria;p__Actinobacteria;D_2__Coriobacteriia;D_3__Coriobacteriales;f__uncultured	0.000960959283650301	0.493387905380556	0.912548797270739	1
k__Fungi;p__Ascomycota;c__Saccharomycetes;o__Saccharomycetales;f__Incertae sedis;g__Debaryomyces	D_0__Bacteria;p__Actinobacteria;D_2__Coriobacteriia;D_3__Coriobacteriales;f__uncultured	0.015914446818868	0.391845223834008	0.912548797270739	1
k__Fungi;p__Ascomycota;c__Sordariomycetes;o__Hypocreales;f__Nectriaceae;g__Fusarium	D_0__Bacteria;p__Actinobacteria;D_2__Coriobacteriia;D_3__Coriobacteriales;f__uncultured	0.0173824012413405	0.382150440877751	0.912548797270739	-1
k__Fungi;p__Basidiomycota;c__Tremellomycetes;o__Filobasidiales;f__Filobasidiaceae;g__Filobasidium	D_0__Bacteria;p__Actinobacteria;D_2__Coriobacteriia;D_3__Coriobacteriales;f__uncultured	-0.00309720931036302	0.521301928682848	0.912548797270739	1
k__Fungi;p__Ascomycota;c__Dothideomycetes;o__Capnodiales;f__Davidiellaceae	D_0__Bacteria;p__Bacteroidetes;D_2__Bacteroidia;D_3__Bacteroidales;f__Rikenellaceae	0.0309742761622833	0.296539752558886	0.912548797270739	-1
k__Fungi;p__Ascomycota;c__Dothideomycetes;o__Pleosporales;f__Pleosporaceae	D_0__Bacteria;p__Bacteroidetes;D_2__Bacteroidia;D_3__Bacteroidales;f__Rikenellaceae	-0.006138086567586	0.542158023305846	0.912548797270739	-1
k__Fungi;p__Ascomycota;c__Eurotiomycetes;o__Eurotiales;f__Trichocomaceae	D_0__Bacteria;p__Bacteroidetes;D_2__Bacteroidia;D_3__Bacteroidales;f__Rikenellaceae	0.0117588637518298	0.4196354187308	0.912548797270739	1
k__Fungi;p__Ascomycota;c__Saccharomycetes;o__Saccharomycetales;f__Incertae sedis	D_0__Bacteria;p__Bacteroidetes;D_2__Bacteroidia;D_3__Bacteroidales;f__Rikenellaceae	0.0393669675860695	0.248482539212332	0.912548797270739	1
k__Fungi;p__Ascomycota;c__Saccharomycetes;o__Saccharomycetales;f__Saccharomycetaceae	D_0__Bacteria;p__Bacteroidetes;D_2__Bacteroidia;D_3__Bacteroidales;f__Rikenellaceae	0.0252126799445067	0.331802078069443	0.912548797270739	-1
k__Fungi;p__Ascomycota;c__Sordariomycetes;o__Hypocreales;f__Nectriaceae	D_0__Bacteria;p__Bacteroidetes;D_2__Bacteroidia;D_3__Bacteroidales;f__Rikenellaceae	-0.0163695996970826	0.611168198354895	0.912548797270739	1
k__Fungi;p__Basidiomycota;c__Tremellomycetes;o__Filobasidiales;f__Filobasidiaceae	D_0__Bacteria;p__Bacteroidetes;D_2__Bacteroidia;D_3__Bacteroidales;f__Rikenellaceae	-0.0378366905170807	0.743073069994191	0.912548797270739	1
k__Fungi;p__Ascomycota;c__Dothideomycetes;o__Capnodiales;f__Davidiellaceae;g__Davidiella	D_0__Bacteria;p__Bacteroidetes;D_2__Bacteroidia;D_3__Bacteroidales;f__Rikenellaceae	0.0309742761622833	0.296539752558886	0.912548797270739	-1
k__Fungi;p__Ascomycota;c__Dothideomycetes;o__Pleosporales;f__Pleosporaceae;g__Alternaria	D_0__Bacteria;p__Bacteroidetes;D_2__Bacteroidia;D_3__Bacteroidales;f__Rikenellaceae	-0.006138086567586	0.542158023305846	0.912548797270739	-1
k__Fungi;p__Ascomycota;c__Eurotiomycetes;o__Eurotiales;f__Trichocomaceae;g__Penicillium	D_0__Bacteria;p__Bacteroidetes;D_2__Bacteroidia;D_3__Bacteroidales;f__Rikenellaceae	0.0117588637518298	0.4196354187308	0.912548797270739	1
k__Fungi;p__Ascomycota;c__Saccharomycetes;o__Saccharomycetales;f__Incertae sedis;g__Candida	D_0__Bacteria;p__Bacteroidetes;D_2__Bacteroidia;D_3__Bacteroidales;f__Rikenellaceae	0.0394232246629023	0.248174929875036	0.912548797270739	1
k__Fungi;p__Ascomycota;c__Saccharomycetes;o__Saccharomycetales;f__Saccharomycetaceae;g__Saccharomyces	D_0__Bacteria;p__Bacteroidetes;D_2__Bacteroidia;D_3__Bacteroidales;f__Rikenellaceae	0.00946609329423619	0.435150275900191	0.912548797270739	-1
k__Fungi;p__Ascomycota;c__Sordariomycetes;o__Hypocreales;f__Nectriaceae;g__Fusarium	D_0__Bacteria;p__Bacteroidetes;D_2__Bacteroidia;D_3__Bacteroidales;f__Rikenellaceae	-0.0163695996970826	0.611168198354895	0.912548797270739	1
k__Fungi;p__Basidiomycota;c__Tremellomycetes;o__Filobasidiales;f__Filobasidiaceae;g__Filobasidium	D_0__Bacteria;p__Bacteroidetes;D_2__Bacteroidia;D_3__Bacteroidales;f__Rikenellaceae	-0.0378366905170807	0.743073069994191	0.912548797270739	1
k__Fungi;p__Ascomycota;c__Eurotiomycetes;o__Eurotiales;f__Trichocomaceae	D_0__Bacteria;p__Bacteroidetes;D_2__Bacteroidia;D_3__Bacteroidales;f__Tannerellaceae	-0.0513736283008316	0.812376631419162	0.912548797270739	1
k__Fungi;p__Ascomycota;c__Saccharomycetes;o__Saccharomycetales;f__Incertae sedis	D_0__Bacteria;p__Bacteroidetes;D_2__Bacteroidia;D_3__Bacteroidales;f__Tannerellaceae	-0.0361608766254733	0.733658014483241	0.912548797270739	1
k__Fungi;p__Ascomycota;c__Saccharomycetes;o__Saccharomycetales;f__Saccharomycetaceae	D_0__Bacteria;p__Bacteroidetes;D_2__Bacteroidia;D_3__Bacteroidales;f__Tannerellaceae	-0.0128540603408795	0.587733513967994	0.912548797270739	-1
k__Fungi;p__Ascomycota;c__Sordariomycetes;o__Hypocreales;f__Cordycipitaceae	D_0__Bacteria;p__Bacteroidetes;D_2__Bacteroidia;D_3__Bacteroidales;f__Tannerellaceae	0.027891416400039	0.315197709273502	0.912548797270739	1
k__Fungi;p__Ascomycota;c__Sordariomycetes;o__Hypocreales;f__Nectriaceae	D_0__Bacteria;p__Bacteroidetes;D_2__Bacteroidia;D_3__Bacteroidales;f__Tannerellaceae	-0.040938688399965	0.760034926433585	0.912548797270739	1
k__Fungi;p__Basidiomycota;c__Tremellomycetes;o__Filobasidiales;f__Filobasidiaceae	D_0__Bacteria;p__Bacteroidetes;D_2__Bacteroidia;D_3__Bacteroidales;f__Tannerellaceae	0.0260221491647965	0.326747830150816	0.912548797270739	1
k__Fungi;p__Ascomycota;c__Eurotiomycetes;o__Eurotiales;f__Trichocomaceae;g__Penicillium	D_0__Bacteria;p__Bacteroidetes;D_2__Bacteroidia;D_3__Bacteroidales;f__Tannerellaceae	-0.0513736283008316	0.812376631419162	0.912548797270739	1
k__Fungi;p__Ascomycota;c__Saccharomycetes;o__Saccharomycetales;f__Incertae sedis;g__Candida	D_0__Bacteria;p__Bacteroidetes;D_2__Bacteroidia;D_3__Bacteroidales;f__Tannerellaceae	0.0263313159554779	0.324825676108744	0.912548797270739	-1
k__Fungi;p__Ascomycota;c__Saccharomycetes;o__Saccharomycetales;f__Incertae sedis;g__Debaryomyces	D_0__Bacteria;p__Bacteroidetes;D_2__Bacteroidia;D_3__Bacteroidales;f__Tannerellaceae	0.00764787700643255	0.447526139537732	0.912548797270739	1
k__Fungi;p__Ascomycota;c__Saccharomycetes;o__Saccharomycetales;f__Saccharomycetaceae;g__Saccharomyces	D_0__Bacteria;p__Bacteroidetes;D_2__Bacteroidia;D_3__Bacteroidales;f__Tannerellaceae	-0.0194963416347677	0.631680985244372	0.912548797270739	-1
k__Fungi;p__Ascomycota;c__Sordariomycetes;o__Hypocreales;f__Nectriaceae;g__Fusarium	D_0__Bacteria;p__Bacteroidetes;D_2__Bacteroidia;D_3__Bacteroidales;f__Tannerellaceae	-0.040938688399965	0.760034926433585	0.912548797270739	1
k__Fungi;p__Basidiomycota;c__Tremellomycetes;o__Filobasidiales;f__Filobasidiaceae;g__Filobasidium	D_0__Bacteria;p__Bacteroidetes;D_2__Bacteroidia;D_3__Bacteroidales;f__Tannerellaceae	0.0260221491647965	0.326747830150816	0.912548797270739	1
k__Fungi;p__Ascomycota;c__Dothideomycetes;o__Capnodiales;f__Davidiellaceae	D_0__Bacteria;p__Bacteroidetes;D_2__Bacteroidia;D_3__Flavobacteriales;f__Flavobacteriaceae	-0.00592042333155825	0.540668312029923	0.912548797270739	-1
k__Fungi;p__Ascomycota;c__Dothideomycetes;o__Pleosporales;f__Pleosporaceae	D_0__Bacteria;p__Bacteroidetes;D_2__Bacteroidia;D_3__Flavobacteriales;f__Flavobacteriaceae	-0.0132052960363838	0.590090400756532	0.912548797270739	-1
k__Fungi;p__Ascomycota;c__Eurotiomycetes;o__Eurotiales;f__Trichocomaceae	D_0__Bacteria;p__Bacteroidetes;D_2__Bacteroidia;D_3__Flavobacteriales;f__Flavobacteriaceae	0.00772972620067154	0.446967838679324	0.912548797270739	1
k__Fungi;p__Ascomycota;c__Saccharomycetes;o__Saccharomycetales;f__Incertae sedis	D_0__Bacteria;p__Bacteroidetes;D_2__Bacteroidia;D_3__Flavobacteriales;f__Flavobacteriaceae	0.0414251307723151	0.237361415645499	0.912548797270739	-1
k__Fungi;p__Ascomycota;c__Saccharomycetes;o__Saccharomycetales;f__Saccharomycetaceae	D_0__Bacteria;p__Bacteroidetes;D_2__Bacteroidia;D_3__Flavobacteriales;f__Flavobacteriaceae	0.00142602186110517	0.490188475928996	0.912548797270739	1
k__Fungi;p__Ascomycota;c__Sordariomycetes;o__Hypocreales;f__Cordycipitaceae	D_0__Bacteria;p__Bacteroidetes;D_2__Bacteroidia;D_3__Flavobacteriales;f__Flavobacteriaceae	-0.0381628225053127	0.744885107156726	0.912548797270739	1
k__Fungi;p__Ascomycota;c__Sordariomycetes;o__Hypocreales;f__Nectriaceae	D_0__Bacteria;p__Bacteroidetes;D_2__Bacteroidia;D_3__Flavobacteriales;f__Flavobacteriaceae	-0.0147512128234312	0.600424384338088	0.912548797270739	1
k__Fungi;p__Basidiomycota;c__Tremellomycetes;o__Filobasidiales;f__Filobasidiaceae	D_0__Bacteria;p__Bacteroidetes;D_2__Bacteroidia;D_3__Flavobacteriales;f__Flavobacteriaceae	-0.0412404960775994	0.761652157985831	0.912548797270739	1
k__Fungi;p__Ascomycota;c__Dothideomycetes;o__Capnodiales;f__Davidiellaceae;g__Davidiella	D_0__Bacteria;p__Bacteroidetes;D_2__Bacteroidia;D_3__Flavobacteriales;f__Flavobacteriaceae	-0.00592042333155825	0.540668312029923	0.912548797270739	-1
k__Fungi;p__Ascomycota;c__Dothideomycetes;o__Pleosporales;f__Pleosporaceae;g__Alternaria	D_0__Bacteria;p__Bacteroidetes;D_2__Bacteroidia;D_3__Flavobacteriales;f__Flavobacteriaceae	-0.0132052960363838	0.590090400756532	0.912548797270739	-1
k__Fungi;p__Ascomycota;c__Eurotiomycetes;o__Eurotiales;f__Trichocomaceae;g__Penicillium	D_0__Bacteria;p__Bacteroidetes;D_2__Bacteroidia;D_3__Flavobacteriales;f__Flavobacteriaceae	0.00772972620067154	0.446967838679324	0.912548797270739	1
k__Fungi;p__Ascomycota;c__Saccharomycetes;o__Saccharomycetales;f__Incertae sedis;g__Candida	D_0__Bacteria;p__Bacteroidetes;D_2__Bacteroidia;D_3__Flavobacteriales;f__Flavobacteriaceae	-0.00176541097815814	0.51214598971681	0.912548797270739	-1
k__Fungi;p__Ascomycota;c__Saccharomycetes;o__Saccharomycetales;f__Incertae sedis;g__Debaryomyces	D_0__Bacteria;p__Bacteroidetes;D_2__Bacteroidia;D_3__Flavobacteriales;f__Flavobacteriaceae	0.011874155940334	0.418858316327332	0.912548797270739	1
k__Fungi;p__Ascomycota;c__Saccharomycetes;o__Saccharomycetales;f__Saccharomycetaceae;g__Saccharomyces	D_0__Bacteria;p__Bacteroidetes;D_2__Bacteroidia;D_3__Flavobacteriales;f__Flavobacteriaceae	0.00203562062408784	0.485995683210081	0.912548797270739	1
k__Fungi;p__Ascomycota;c__Sordariomycetes;o__Hypocreales;f__Nectriaceae;g__Fusarium	D_0__Bacteria;p__Bacteroidetes;D_2__Bacteroidia;D_3__Flavobacteriales;f__Flavobacteriaceae	-0.0147512128234312	0.600424384338088	0.912548797270739	1
k__Fungi;p__Basidiomycota;c__Tremellomycetes;o__Filobasidiales;f__Filobasidiaceae;g__Filobasidium	D_0__Bacteria;p__Bacteroidetes;D_2__Bacteroidia;D_3__Flavobacteriales;f__Flavobacteriaceae	-0.0412404960775994	0.761652157985831	0.912548797270739	1
k__Fungi;p__Ascomycota;c__Dothideomycetes;o__Capnodiales;f__Davidiellaceae	D_0__Bacteria;p__Firmicutes;D_2__Bacilli;D_3__Bacillales;f__Family XI	-0.0159538784562432	0.608416098889999	0.912548797270739	1
k__Fungi;p__Ascomycota;c__Dothideomycetes;o__Pleosporales;f__Pleosporaceae	D_0__Bacteria;p__Firmicutes;D_2__Bacilli;D_3__Bacillales;f__Family XI	0.00638053542528262	0.456183324269864	0.912548797270739	1
k__Fungi;p__Ascomycota;c__Eurotiomycetes;o__Eurotiales;f__Trichocomaceae	D_0__Bacteria;p__Firmicutes;D_2__Bacilli;D_3__Bacillales;f__Family XI	-0.0277417740308382	0.683884053230688	0.912548797270739	1
k__Fungi;p__Ascomycota;c__Saccharomycetes;o__Saccharomycetales;f__Saccharomycetaceae	D_0__Bacteria;p__Firmicutes;D_2__Bacilli;D_3__Bacillales;f__Family XI	-0.0465865787950645	0.789293215212669	0.912548797270739	1
k__Fungi;p__Basidiomycota;c__Tremellomycetes;o__Filobasidiales;f__Filobasidiaceae	D_0__Bacteria;p__Firmicutes;D_2__Bacilli;D_3__Bacillales;f__Family XI	-0.0572434901137501	0.838462289378971	0.912548797270739	1
k__Fungi;p__Ascomycota;c__Dothideomycetes;o__Capnodiales;f__Davidiellaceae;g__Davidiella	D_0__Bacteria;p__Firmicutes;D_2__Bacilli;D_3__Bacillales;f__Family XI	-0.0159538784562432	0.608416098889999	0.912548797270739	1
k__Fungi;p__Ascomycota;c__Dothideomycetes;o__Pleosporales;f__Pleosporaceae;g__Alternaria	D_0__Bacteria;p__Firmicutes;D_2__Bacilli;D_3__Bacillales;f__Family XI	0.00638053542528262	0.456183324269864	0.912548797270739	1
k__Fungi;p__Ascomycota;c__Eurotiomycetes;o__Eurotiales;f__Trichocomaceae;g__Penicillium	D_0__Bacteria;p__Firmicutes;D_2__Bacilli;D_3__Bacillales;f__Family XI	-0.0277417740308382	0.683884053230688	0.912548797270739	1
k__Fungi;p__Ascomycota;c__Saccharomycetes;o__Saccharomycetales;f__Incertae sedis;g__Candida	D_0__Bacteria;p__Firmicutes;D_2__Bacilli;D_3__Bacillales;f__Family XI	-0.0317739367789044	0.708216416602437	0.912548797270739	1
k__Fungi;p__Ascomycota;c__Saccharomycetes;o__Saccharomycetales;f__Incertae sedis;g__Debaryomyces	D_0__Bacteria;p__Firmicutes;D_2__Bacilli;D_3__Bacillales;f__Family XI	-0.000441303589199649	0.503036596902397	0.912548797270739	1
k__Fungi;p__Ascomycota;c__Saccharomycetes;o__Saccharomycetales;f__Saccharomycetaceae;g__Saccharomyces	D_0__Bacteria;p__Firmicutes;D_2__Bacilli;D_3__Bacillales;f__Family XI	-0.0450278227855754	0.78143333569578	0.912548797270739	1
k__Fungi;p__Basidiomycota;c__Tremellomycetes;o__Filobasidiales;f__Filobasidiaceae;g__Filobasidium	D_0__Bacteria;p__Firmicutes;D_2__Bacilli;D_3__Bacillales;f__Family XI	-0.0572434901137501	0.838462289378971	0.912548797270739	1
k__Fungi;p__Ascomycota;c__Dothideomycetes;o__Capnodiales;f__Davidiellaceae	D_0__Bacteria;p__Firmicutes;D_2__Bacilli;D_3__Lactobacillales;f__Enterococcaceae	0.0193309910315722	0.369395058907969	0.912548797270739	1
k__Fungi;p__Ascomycota;c__Dothideomycetes;o__Pleosporales;f__Pleosporaceae	D_0__Bacteria;p__Firmicutes;D_2__Bacilli;D_3__Lactobacillales;f__Enterococcaceae	-0.022630402571647	0.651873589493079	0.912548797270739	-1
k__Fungi;p__Ascomycota;c__Eurotiomycetes;o__Eurotiales;f__Trichocomaceae	D_0__Bacteria;p__Firmicutes;D_2__Bacilli;D_3__Lactobacillales;f__Enterococcaceae	0.00905900138878278	0.437916139207612	0.912548797270739	1
k__Fungi;p__Ascomycota;c__Saccharomycetes;o__Saccharomycetales;f__Incertae sedis	D_0__Bacteria;p__Firmicutes;D_2__Bacilli;D_3__Lactobacillales;f__Enterococcaceae	0.0232064157830105	0.344459376350402	0.912548797270739	-1
k__Fungi;p__Ascomycota;c__Saccharomycetes;o__Saccharomycetales;f__Saccharomycetaceae	D_0__Bacteria;p__Firmicutes;D_2__Bacilli;D_3__Lactobacillales;f__Enterococcaceae	0.0175160165423542	0.381271546505318	0.912548797270739	1
k__Fungi;p__Ascomycota;c__Sordariomycetes;o__Hypocreales;f__Cordycipitaceae	D_0__Bacteria;p__Firmicutes;D_2__Bacilli;D_3__Lactobacillales;f__Enterococcaceae	0.000393757018149282	0.497290564335093	0.912548797270739	-1
k__Fungi;p__Ascomycota;c__Sordariomycetes;o__Hypocreales;f__Nectriaceae	D_0__Bacteria;p__Firmicutes;D_2__Bacilli;D_3__Lactobacillales;f__Enterococcaceae	0.028661215335165	0.310492091656867	0.912548797270739	-1
k__Fungi;p__Basidiomycota;c__Tremellomycetes;o__Filobasidiales;f__Filobasidiaceae	D_0__Bacteria;p__Firmicutes;D_2__Bacilli;D_3__Lactobacillales;f__Enterococcaceae	0.0253315084975933	0.331058185807498	0.912548797270739	1
k__Fungi;p__Ascomycota;c__Dothideomycetes;o__Capnodiales;f__Davidiellaceae;g__Davidiella	D_0__Bacteria;p__Firmicutes;D_2__Bacilli;D_3__Lactobacillales;f__Enterococcaceae	0.0193309910315722	0.369395058907969	0.912548797270739	1
k__Fungi;p__Ascomycota;c__Dothideomycetes;o__Pleosporales;f__Pleosporaceae;g__Alternaria	D_0__Bacteria;p__Firmicutes;D_2__Bacilli;D_3__Lactobacillales;f__Enterococcaceae	-0.022630402571647	0.651873589493079	0.912548797270739	-1
k__Fungi;p__Ascomycota;c__Eurotiomycetes;o__Eurotiales;f__Trichocomaceae;g__Penicillium	D_0__Bacteria;p__Firmicutes;D_2__Bacilli;D_3__Lactobacillales;f__Enterococcaceae	0.00905900138878278	0.437916139207612	0.912548797270739	1
k__Fungi;p__Ascomycota;c__Saccharomycetes;o__Saccharomycetales;f__Incertae sedis;g__Candida	D_0__Bacteria;p__Firmicutes;D_2__Bacilli;D_3__Lactobacillales;f__Enterococcaceae	0.00286512328893347	0.480292963432751	0.912548797270739	-1
k__Fungi;p__Ascomycota;c__Saccharomycetes;o__Saccharomycetales;f__Saccharomycetaceae;g__Saccharomyces	D_0__Bacteria;p__Firmicutes;D_2__Bacilli;D_3__Lactobacillales;f__Enterococcaceae	0.0223456589846142	0.349944412328741	0.912548797270739	1
k__Fungi;p__Ascomycota;c__Sordariomycetes;o__Hypocreales;f__Nectriaceae;g__Fusarium	D_0__Bacteria;p__Firmicutes;D_2__Bacilli;D_3__Lactobacillales;f__Enterococcaceae	0.028661215335165	0.310492091656867	0.912548797270739	-1
k__Fungi;p__Basidiomycota;c__Tremellomycetes;o__Filobasidiales;f__Filobasidiaceae;g__Filobasidium	D_0__Bacteria;p__Firmicutes;D_2__Bacilli;D_3__Lactobacillales;f__Enterococcaceae	0.0253315084975933	0.331058185807498	0.912548797270739	1
k__Fungi;p__Ascomycota;c__Dothideomycetes;o__Pleosporales;f__Pleosporaceae	D_0__Bacteria;p__Firmicutes;D_2__Bacilli;D_3__Lactobacillales;f__Streptococcaceae	-0.0417624293203145	0.764434856913622	0.912548797270739	-1
k__Fungi;p__Ascomycota;c__Eurotiomycetes;o__Eurotiales;f__Trichocomaceae	D_0__Bacteria;p__Firmicutes;D_2__Bacilli;D_3__Lactobacillales;f__Streptococcaceae	0.006081845360936	0.45822684213047	0.912548797270739	1
k__Fungi;p__Ascomycota;c__Saccharomycetes;o__Saccharomycetales;f__Saccharomycetaceae	D_0__Bacteria;p__Firmicutes;D_2__Bacilli;D_3__Lactobacillales;f__Streptococcaceae	-0.0109061942514321	0.574607854213419	0.912548797270739	1
k__Fungi;p__Basidiomycota;c__Tremellomycetes;o__Filobasidiales;f__Filobasidiaceae	D_0__Bacteria;p__Firmicutes;D_2__Bacilli;D_3__Lactobacillales;f__Streptococcaceae	-0.00334342603085746	0.522993555285513	0.912548797270739	1
k__Fungi;p__Ascomycota;c__Dothideomycetes;o__Pleosporales;f__Pleosporaceae;g__Alternaria	D_0__Bacteria;p__Firmicutes;D_2__Bacilli;D_3__Lactobacillales;f__Streptococcaceae	-0.0417624293203145	0.764434856913622	0.912548797270739	-1
k__Fungi;p__Ascomycota;c__Eurotiomycetes;o__Eurotiales;f__Trichocomaceae;g__Penicillium	D_0__Bacteria;p__Firmicutes;D_2__Bacilli;D_3__Lactobacillales;f__Streptococcaceae	0.006081845360936	0.45822684213047	0.912548797270739	1
k__Fungi;p__Ascomycota;c__Saccharomycetes;o__Saccharomycetales;f__Saccharomycetaceae;g__Saccharomyces	D_0__Bacteria;p__Firmicutes;D_2__Bacilli;D_3__Lactobacillales;f__Streptococcaceae	-0.0142152914118153	0.5968494393215	0.912548797270739	1
k__Fungi;p__Basidiomycota;c__Tremellomycetes;o__Filobasidiales;f__Filobasidiaceae;g__Filobasidium	D_0__Bacteria;p__Firmicutes;D_2__Bacilli;D_3__Lactobacillales;f__Streptococcaceae	-0.00334342603085746	0.522993555285513	0.912548797270739	1
k__Fungi;p__Ascomycota;c__Dothideomycetes;o__Capnodiales;f__Davidiellaceae	D_0__Bacteria;p__Firmicutes;D_2__Clostridia;D_3__Clostridiales;f__Christensenellaceae	-0.00106063229794913	0.507297844476513	0.912548797270739	-1
k__Fungi;p__Ascomycota;c__Dothideomycetes;o__Pleosporales;f__Pleosporaceae	D_0__Bacteria;p__Firmicutes;D_2__Clostridia;D_3__Clostridiales;f__Christensenellaceae	-0.0240104962539988	0.66063529179424	0.912548797270739	-1
k__Fungi;p__Ascomycota;c__Eurotiomycetes;o__Eurotiales;f__Trichocomaceae	D_0__Bacteria;p__Firmicutes;D_2__Clostridia;D_3__Clostridiales;f__Christensenellaceae	-0.0498407819289977	0.805160195923064	0.912548797270739	1
k__Fungi;p__Ascomycota;c__Sordariomycetes;o__Hypocreales;f__Cordycipitaceae	D_0__Bacteria;p__Firmicutes;D_2__Clostridia;D_3__Clostridiales;f__Christensenellaceae	-0.0211734785171101	0.642535867751805	0.912548797270739	1
k__Fungi;p__Ascomycota;c__Sordariomycetes;o__Hypocreales;f__Nectriaceae	D_0__Bacteria;p__Firmicutes;D_2__Clostridia;D_3__Clostridiales;f__Christensenellaceae	-0.0341321191914728	0.722032217103365	0.912548797270739	-1
k__Fungi;p__Basidiomycota;c__Tremellomycetes;o__Filobasidiales;f__Filobasidiaceae	D_0__Bacteria;p__Firmicutes;D_2__Clostridia;D_3__Clostridiales;f__Christensenellaceae	0.0260360114094005	0.326661547175757	0.912548797270739	-1
k__Fungi;p__Ascomycota;c__Dothideomycetes;o__Capnodiales;f__Davidiellaceae;g__Davidiella	D_0__Bacteria;p__Firmicutes;D_2__Clostridia;D_3__Clostridiales;f__Christensenellaceae	-0.00106063229794913	0.507297844476513	0.912548797270739	-1
k__Fungi;p__Ascomycota;c__Dothideomycetes;o__Pleosporales;f__Pleosporaceae;g__Alternaria	D_0__Bacteria;p__Firmicutes;D_2__Clostridia;D_3__Clostridiales;f__Christensenellaceae	-0.0240104962539988	0.66063529179424	0.912548797270739	-1
k__Fungi;p__Ascomycota;c__Eurotiomycetes;o__Eurotiales;f__Trichocomaceae;g__Penicillium	D_0__Bacteria;p__Firmicutes;D_2__Clostridia;D_3__Clostridiales;f__Christensenellaceae	-0.0498407819289977	0.805160195923064	0.912548797270739	1
k__Fungi;p__Ascomycota;c__Saccharomycetes;o__Saccharomycetales;f__Incertae sedis;g__Candida	D_0__Bacteria;p__Firmicutes;D_2__Clostridia;D_3__Clostridiales;f__Christensenellaceae	-0.0088046773209321	0.560354390866666	0.912548797270739	1
k__Fungi;p__Ascomycota;c__Sordariomycetes;o__Hypocreales;f__Nectriaceae;g__Fusarium	D_0__Bacteria;p__Firmicutes;D_2__Clostridia;D_3__Clostridiales;f__Christensenellaceae	-0.0341321191914728	0.722032217103365	0.912548797270739	-1
k__Fungi;p__Basidiomycota;c__Tremellomycetes;o__Filobasidiales;f__Filobasidiaceae;g__Filobasidium	D_0__Bacteria;p__Firmicutes;D_2__Clostridia;D_3__Clostridiales;f__Christensenellaceae	0.0260360114094005	0.326661547175757	0.912548797270739	-1
k__Fungi;p__Ascomycota;c__Dothideomycetes;o__Capnodiales;f__Davidiellaceae	D_0__Bacteria;p__Firmicutes;D_2__Clostridia;D_3__Clostridiales;f__Clostridiaceae 1	0.0187631924425826	0.373097803395251	0.912548797270739	-1
k__Fungi;p__Ascomycota;c__Eurotiomycetes;o__Eurotiales;f__Trichocomaceae	D_0__Bacteria;p__Firmicutes;D_2__Clostridia;D_3__Clostridiales;f__Clostridiaceae 1	-0.0312718880110189	0.705234491093184	0.912548797270739	-1
k__Fungi;p__Ascomycota;c__Saccharomycetes;o__Saccharomycetales;f__Incertae sedis	D_0__Bacteria;p__Firmicutes;D_2__Clostridia;D_3__Clostridiales;f__Clostridiaceae 1	0.014275550387627	0.402748185958224	0.912548797270739	-1
k__Fungi;p__Ascomycota;c__Saccharomycetes;o__Saccharomycetales;f__Saccharomycetaceae	D_0__Bacteria;p__Firmicutes;D_2__Clostridia;D_3__Clostridiales;f__Clostridiaceae 1	-0.00749859996152663	0.551455362403418	0.912548797270739	1
k__Fungi;p__Ascomycota;c__Sordariomycetes;o__Hypocreales;f__Cordycipitaceae	D_0__Bacteria;p__Firmicutes;D_2__Clostridia;D_3__Clostridiales;f__Clostridiaceae 1	-0.0357735307913992	0.731457374645951	0.912548797270739	-1
k__Fungi;p__Ascomycota;c__Sordariomycetes;o__Hypocreales;f__Nectriaceae	D_0__Bacteria;p__Firmicutes;D_2__Clostridia;D_3__Clostridiales;f__Clostridiaceae 1	0.00515573640835869	0.464569658293933	0.912548797270739	-1
k__Fungi;p__Basidiomycota;c__Tremellomycetes;o__Filobasidiales;f__Filobasidiaceae	D_0__Bacteria;p__Firmicutes;D_2__Clostridia;D_3__Clostridiales;f__Clostridiaceae 1	-0.0551802542486755	0.829574714405518	0.912548797270739	-1
k__Fungi;p__Ascomycota;c__Dothideomycetes;o__Capnodiales;f__Davidiellaceae;g__Davidiella	D_0__Bacteria;p__Firmicutes;D_2__Clostridia;D_3__Clostridiales;f__Clostridiaceae 1	0.0187631924425826	0.373097803395251	0.912548797270739	-1
k__Fungi;p__Ascomycota;c__Eurotiomycetes;o__Eurotiales;f__Trichocomaceae;g__Penicillium	D_0__Bacteria;p__Firmicutes;D_2__Clostridia;D_3__Clostridiales;f__Clostridiaceae 1	-0.0312718880110189	0.705234491093184	0.912548797270739	-1
k__Fungi;p__Ascomycota;c__Saccharomycetes;o__Saccharomycetales;f__Saccharomycetaceae;g__Saccharomyces	D_0__Bacteria;p__Firmicutes;D_2__Clostridia;D_3__Clostridiales;f__Clostridiaceae 1	-0.00934800320583355	0.564047715417037	0.912548797270739	1
k__Fungi;p__Ascomycota;c__Sordariomycetes;o__Hypocreales;f__Nectriaceae;g__Fusarium	D_0__Bacteria;p__Firmicutes;D_2__Clostridia;D_3__Clostridiales;f__Clostridiaceae 1	0.00515573640835869	0.464569658293933	0.912548797270739	-1
k__Fungi;p__Basidiomycota;c__Tremellomycetes;o__Filobasidiales;f__Filobasidiaceae;g__Filobasidium	D_0__Bacteria;p__Firmicutes;D_2__Clostridia;D_3__Clostridiales;f__Clostridiaceae 1	-0.0551802542486755	0.829574714405518	0.912548797270739	-1
k__Fungi;p__Ascomycota;c__Dothideomycetes;o__Pleosporales;f__Pleosporaceae	D_0__Bacteria;p__Firmicutes;D_2__Clostridia;D_3__Clostridiales;f__Clostridiales vadinBB60 group	0.0163814779761799	0.388753247511776	0.912548797270739	-1
k__Fungi;p__Ascomycota;c__Eurotiomycetes;o__Eurotiales;f__Trichocomaceae	D_0__Bacteria;p__Firmicutes;D_2__Clostridia;D_3__Clostridiales;f__Clostridiales vadinBB60 group	0.0260499299344146	0.326574923173465	0.912548797270739	1
k__Fungi;p__Ascomycota;c__Saccharomycetes;o__Saccharomycetales;f__Incertae sedis	D_0__Bacteria;p__Firmicutes;D_2__Clostridia;D_3__Clostridiales;f__Clostridiales vadinBB60 group	-0.0561847235066042	0.833939786910886	0.912548797270739	-1
k__Fungi;p__Ascomycota;c__Saccharomycetes;o__Saccharomycetales;f__Saccharomycetaceae	D_0__Bacteria;p__Firmicutes;D_2__Clostridia;D_3__Clostridiales;f__Clostridiales vadinBB60 group	-0.015444475439216	0.605036458428537	0.912548797270739	1
k__Fungi;p__Ascomycota;c__Sordariomycetes;o__Hypocreales;f__Nectriaceae	D_0__Bacteria;p__Firmicutes;D_2__Clostridia;D_3__Clostridiales;f__Clostridiales vadinBB60 group	-0.0383311917000984	0.74581798136873	0.912548797270739	-1
k__Fungi;p__Ascomycota;c__Dothideomycetes;o__Pleosporales;f__Pleosporaceae;g__Alternaria	D_0__Bacteria;p__Firmicutes;D_2__Clostridia;D_3__Clostridiales;f__Clostridiales vadinBB60 group	0.0163814779761799	0.388753247511776	0.912548797270739	-1
k__Fungi;p__Ascomycota;c__Eurotiomycetes;o__Eurotiales;f__Trichocomaceae;g__Penicillium	D_0__Bacteria;p__Firmicutes;D_2__Clostridia;D_3__Clostridiales;f__Clostridiales vadinBB60 group	0.0260499299344146	0.326574923173465	0.912548797270739	1
k__Fungi;p__Ascomycota;c__Saccharomycetes;o__Saccharomycetales;f__Incertae sedis;g__Candida	D_0__Bacteria;p__Firmicutes;D_2__Clostridia;D_3__Clostridiales;f__Clostridiales vadinBB60 group	0.00872226796395665	0.440206261800454	0.912548797270739	-1
k__Fungi;p__Ascomycota;c__Saccharomycetes;o__Saccharomycetales;f__Incertae sedis;g__Debaryomyces	D_0__Bacteria;p__Firmicutes;D_2__Clostridia;D_3__Clostridiales;f__Clostridiales vadinBB60 group	-0.0541206124612333	0.824891381615507	0.912548797270739	1
k__Fungi;p__Ascomycota;c__Saccharomycetes;o__Saccharomycetales;f__Saccharomycetaceae;g__Saccharomyces	D_0__Bacteria;p__Firmicutes;D_2__Clostridia;D_3__Clostridiales;f__Clostridiales vadinBB60 group	-0.020730725853704	0.639680963456922	0.912548797270739	1
k__Fungi;p__Ascomycota;c__Sordariomycetes;o__Hypocreales;f__Nectriaceae;g__Fusarium	D_0__Bacteria;p__Firmicutes;D_2__Clostridia;D_3__Clostridiales;f__Clostridiales vadinBB60 group	-0.0383311917000984	0.74581798136873	0.912548797270739	-1
k__Fungi;p__Ascomycota;c__Dothideomycetes;o__Capnodiales;f__Davidiellaceae	D_0__Bacteria;p__Firmicutes;D_2__Clostridia;D_3__Clostridiales;f__Defluviitaleaceae	0.0407026439342549	0.241234051490883	0.912548797270739	-1
k__Fungi;p__Ascomycota;c__Saccharomycetes;o__Saccharomycetales;f__Saccharomycetaceae	D_0__Bacteria;p__Firmicutes;D_2__Clostridia;D_3__Clostridiales;f__Defluviitaleaceae	-0.0163876824676466	0.611287782596669	0.912548797270739	1
k__Fungi;p__Ascomycota;c__Sordariomycetes;o__Hypocreales;f__Cordycipitaceae	D_0__Bacteria;p__Firmicutes;D_2__Clostridia;D_3__Clostridiales;f__Defluviitaleaceae	-0.0480625159697713	0.796581140200932	0.912548797270739	1
k__Fungi;p__Ascomycota;c__Sordariomycetes;o__Hypocreales;f__Nectriaceae	D_0__Bacteria;p__Firmicutes;D_2__Clostridia;D_3__Clostridiales;f__Defluviitaleaceae	-0.040550589956629	0.757946586793818	0.912548797270739	-1
k__Fungi;p__Ascomycota;c__Dothideomycetes;o__Capnodiales;f__Davidiellaceae;g__Davidiella	D_0__Bacteria;p__Firmicutes;D_2__Clostridia;D_3__Clostridiales;f__Defluviitaleaceae	0.0407026439342549	0.241234051490883	0.912548797270739	-1
k__Fungi;p__Ascomycota;c__Saccharomycetes;o__Saccharomycetales;f__Incertae sedis;g__Debaryomyces	D_0__Bacteria;p__Firmicutes;D_2__Clostridia;D_3__Clostridiales;f__Defluviitaleaceae	-0.0174395584880442	0.618225602153721	0.912548797270739	1
k__Fungi;p__Ascomycota;c__Saccharomycetes;o__Saccharomycetales;f__Saccharomycetaceae;g__Saccharomyces	D_0__Bacteria;p__Firmicutes;D_2__Clostridia;D_3__Clostridiales;f__Defluviitaleaceae	-0.0251052140040994	0.667524593294355	0.912548797270739	1
k__Fungi;p__Ascomycota;c__Sordariomycetes;o__Hypocreales;f__Nectriaceae;g__Fusarium	D_0__Bacteria;p__Firmicutes;D_2__Clostridia;D_3__Clostridiales;f__Defluviitaleaceae	-0.040550589956629	0.757946586793818	0.912548797270739	-1
k__Fungi;p__Ascomycota;c__Dothideomycetes;o__Capnodiales;f__Davidiellaceae	D_0__Bacteria;p__Firmicutes;D_2__Clostridia;D_3__Clostridiales;f__Eubacteriaceae	-0.0137696745043799	0.593870725409795	0.912548797270739	1
k__Fungi;p__Ascomycota;c__Dothideomycetes;o__Pleosporales;f__Pleosporaceae	D_0__Bacteria;p__Firmicutes;D_2__Clostridia;D_3__Clostridiales;f__Eubacteriaceae	-0.0587472798945913	0.844747037091066	0.912548797270739	-1
k__Fungi;p__Ascomycota;c__Eurotiomycetes;o__Eurotiales;f__Trichocomaceae	D_0__Bacteria;p__Firmicutes;D_2__Clostridia;D_3__Clostridiales;f__Eubacteriaceae	-0.055603944493476	0.831424763553758	0.912548797270739	-1
k__Fungi;p__Ascomycota;c__Saccharomycetes;o__Saccharomycetales;f__Saccharomycetaceae	D_0__Bacteria;p__Firmicutes;D_2__Clostridia;D_3__Clostridiales;f__Eubacteriaceae	-0.0373139075586604	0.740154571982706	0.912548797270739	1
k__Fungi;p__Ascomycota;c__Sordariomycetes;o__Hypocreales;f__Cordycipitaceae	D_0__Bacteria;p__Firmicutes;D_2__Clostridia;D_3__Clostridiales;f__Eubacteriaceae	0.0347053888144674	0.274657825595068	0.912548797270739	-1
k__Fungi;p__Ascomycota;c__Sordariomycetes;o__Hypocreales;f__Nectriaceae	D_0__Bacteria;p__Firmicutes;D_2__Clostridia;D_3__Clostridiales;f__Eubacteriaceae	0.018996428950781	0.371575380914587	0.912548797270739	-1
k__Fungi;p__Basidiomycota;c__Tremellomycetes;o__Filobasidiales;f__Filobasidiaceae	D_0__Bacteria;p__Firmicutes;D_2__Clostridia;D_3__Clostridiales;f__Eubacteriaceae	-0.0122897767445291	0.583940452364597	0.912548797270739	1
k__Fungi;p__Ascomycota;c__Dothideomycetes;o__Capnodiales;f__Davidiellaceae;g__Davidiella	D_0__Bacteria;p__Firmicutes;D_2__Clostridia;D_3__Clostridiales;f__Eubacteriaceae	-0.0137696745043799	0.593870725409795	0.912548797270739	1
k__Fungi;p__Ascomycota;c__Dothideomycetes;o__Pleosporales;f__Pleosporaceae;g__Alternaria	D_0__Bacteria;p__Firmicutes;D_2__Clostridia;D_3__Clostridiales;f__Eubacteriaceae	-0.0587472798945913	0.844747037091066	0.912548797270739	-1
k__Fungi;p__Ascomycota;c__Eurotiomycetes;o__Eurotiales;f__Trichocomaceae;g__Penicillium	D_0__Bacteria;p__Firmicutes;D_2__Clostridia;D_3__Clostridiales;f__Eubacteriaceae	-0.055603944493476	0.831424763553758	0.912548797270739	-1
k__Fungi;p__Ascomycota;c__Saccharomycetes;o__Saccharomycetales;f__Incertae sedis;g__Debaryomyces	D_0__Bacteria;p__Firmicutes;D_2__Clostridia;D_3__Clostridiales;f__Eubacteriaceae	-0.0661051430762779	0.873157335916699	0.912548797270739	-1
k__Fungi;p__Ascomycota;c__Saccharomycetes;o__Saccharomycetales;f__Saccharomycetaceae;g__Saccharomyces	D_0__Bacteria;p__Firmicutes;D_2__Clostridia;D_3__Clostridiales;f__Eubacteriaceae	-0.0419753674777963	0.765564998768266	0.912548797270739	1
k__Fungi;p__Ascomycota;c__Sordariomycetes;o__Hypocreales;f__Nectriaceae;g__Fusarium	D_0__Bacteria;p__Firmicutes;D_2__Clostridia;D_3__Clostridiales;f__Eubacteriaceae	0.018996428950781	0.371575380914587	0.912548797270739	-1
k__Fungi;p__Basidiomycota;c__Tremellomycetes;o__Filobasidiales;f__Filobasidiaceae;g__Filobasidium	D_0__Bacteria;p__Firmicutes;D_2__Clostridia;D_3__Clostridiales;f__Eubacteriaceae	-0.0122897767445291	0.583940452364597	0.912548797270739	1
k__Fungi;p__Ascomycota;c__Dothideomycetes;o__Capnodiales;f__Davidiellaceae	D_0__Bacteria;p__Firmicutes;D_2__Clostridia;D_3__Clostridiales;f__Family XI	-0.0081226980452338	0.555711183141582	0.912548797270739	-1
k__Fungi;p__Ascomycota;c__Dothideomycetes;o__Pleosporales;f__Pleosporaceae	D_0__Bacteria;p__Firmicutes;D_2__Clostridia;D_3__Clostridiales;f__Family XI	-0.0520264920338725	0.815399671726997	0.912548797270739	-1
k__Fungi;p__Ascomycota;c__Eurotiomycetes;o__Eurotiales;f__Trichocomaceae	D_0__Bacteria;p__Firmicutes;D_2__Clostridia;D_3__Clostridiales;f__Family XI	0.0222676012594978	0.350443387741429	0.912548797270739	1
k__Fungi;p__Ascomycota;c__Saccharomycetes;o__Saccharomycetales;f__Incertae sedis	D_0__Bacteria;p__Firmicutes;D_2__Clostridia;D_3__Clostridiales;f__Family XI	0.00205326763450798	0.4858743285826	0.912548797270739	-1
k__Fungi;p__Ascomycota;c__Saccharomycetes;o__Saccharomycetales;f__Saccharomycetaceae	D_0__Bacteria;p__Firmicutes;D_2__Clostridia;D_3__Clostridiales;f__Family XI	-0.0559136837293772	0.832769084728346	0.912548797270739	-1
k__Fungi;p__Ascomycota;c__Sordariomycetes;o__Hypocreales;f__Cordycipitaceae	D_0__Bacteria;p__Firmicutes;D_2__Clostridia;D_3__Clostridiales;f__Family XI	-0.0416060825996134	0.763603166606361	0.912548797270739	-1
k__Fungi;p__Ascomycota;c__Sordariomycetes;o__Hypocreales;f__Nectriaceae	D_0__Bacteria;p__Firmicutes;D_2__Clostridia;D_3__Clostridiales;f__Family XI	-0.0253677616280098	0.669168634712481	0.912548797270739	-1
k__Fungi;p__Basidiomycota;c__Tremellomycetes;o__Filobasidiales;f__Filobasidiaceae	D_0__Bacteria;p__Firmicutes;D_2__Clostridia;D_3__Clostridiales;f__Family XI	-0.0481298984831494	0.796910252139239	0.912548797270739	1
k__Fungi;p__Ascomycota;c__Dothideomycetes;o__Capnodiales;f__Davidiellaceae;g__Davidiella	D_0__Bacteria;p__Firmicutes;D_2__Clostridia;D_3__Clostridiales;f__Family XI	-0.0081226980452338	0.555711183141582	0.912548797270739	-1
k__Fungi;p__Ascomycota;c__Dothideomycetes;o__Pleosporales;f__Pleosporaceae;g__Alternaria	D_0__Bacteria;p__Firmicutes;D_2__Clostridia;D_3__Clostridiales;f__Family XI	-0.0520264920338725	0.815399671726997	0.912548797270739	-1
k__Fungi;p__Ascomycota;c__Eurotiomycetes;o__Eurotiales;f__Trichocomaceae;g__Penicillium	D_0__Bacteria;p__Firmicutes;D_2__Clostridia;D_3__Clostridiales;f__Family XI	0.0222676012594978	0.350443387741429	0.912548797270739	1
k__Fungi;p__Ascomycota;c__Saccharomycetes;o__Saccharomycetales;f__Incertae sedis;g__Candida	D_0__Bacteria;p__Firmicutes;D_2__Clostridia;D_3__Clostridiales;f__Family XI	-0.0516446859627379	0.813635421411723	0.912548797270739	1
k__Fungi;p__Ascomycota;c__Saccharomycetes;o__Saccharomycetales;f__Saccharomycetaceae;g__Saccharomyces	D_0__Bacteria;p__Firmicutes;D_2__Clostridia;D_3__Clostridiales;f__Family XI	-0.0659265538210305	0.872513495641497	0.912548797270739	-1
k__Fungi;p__Ascomycota;c__Sordariomycetes;o__Hypocreales;f__Nectriaceae;g__Fusarium	D_0__Bacteria;p__Firmicutes;D_2__Clostridia;D_3__Clostridiales;f__Family XI	-0.0253677616280098	0.669168634712481	0.912548797270739	-1
k__Fungi;p__Basidiomycota;c__Tremellomycetes;o__Filobasidiales;f__Filobasidiaceae;g__Filobasidium	D_0__Bacteria;p__Firmicutes;D_2__Clostridia;D_3__Clostridiales;f__Family XI	-0.0481298984831494	0.796910252139239	0.912548797270739	1
k__Fungi;p__Ascomycota;c__Dothideomycetes;o__Capnodiales;f__Davidiellaceae	D_0__Bacteria;p__Firmicutes;D_2__Clostridia;D_3__Clostridiales;f__Family XIII	-0.0426982868008617	0.769379440564252	0.912548797270739	1
k__Fungi;p__Ascomycota;c__Dothideomycetes;o__Pleosporales;f__Pleosporaceae	D_0__Bacteria;p__Firmicutes;D_2__Clostridia;D_3__Clostridiales;f__Family XIII	-0.0507063840251096	0.809255755528435	0.912548797270739	-1
k__Fungi;p__Ascomycota;c__Eurotiomycetes;o__Eurotiales;f__Trichocomaceae	D_0__Bacteria;p__Firmicutes;D_2__Clostridia;D_3__Clostridiales;f__Family XIII	-0.00434099535361997	0.529842801130604	0.912548797270739	1
k__Fungi;p__Ascomycota;c__Saccharomycetes;o__Saccharomycetales;f__Incertae sedis	D_0__Bacteria;p__Firmicutes;D_2__Clostridia;D_3__Clostridiales;f__Family XIII	-0.0553029508496785	0.830111796768923	0.912548797270739	-1
k__Fungi;p__Basidiomycota;c__Tremellomycetes;o__Filobasidiales;f__Filobasidiaceae	D_0__Bacteria;p__Firmicutes;D_2__Clostridia;D_3__Clostridiales;f__Family XIII	0.00755156258966109	0.448183241428222	0.912548797270739	1
k__Fungi;p__Ascomycota;c__Dothideomycetes;o__Capnodiales;f__Davidiellaceae;g__Davidiella	D_0__Bacteria;p__Firmicutes;D_2__Clostridia;D_3__Clostridiales;f__Family XIII	-0.0426982868008617	0.769379440564252	0.912548797270739	1
k__Fungi;p__Ascomycota;c__Dothideomycetes;o__Pleosporales;f__Pleosporaceae;g__Alternaria	D_0__Bacteria;p__Firmicutes;D_2__Clostridia;D_3__Clostridiales;f__Family XIII	-0.0507063840251096	0.809255755528435	0.912548797270739	-1
k__Fungi;p__Ascomycota;c__Eurotiomycetes;o__Eurotiales;f__Trichocomaceae;g__Penicillium	D_0__Bacteria;p__Firmicutes;D_2__Clostridia;D_3__Clostridiales;f__Family XIII	-0.00434099535361997	0.529842801130604	0.912548797270739	1
k__Fungi;p__Ascomycota;c__Saccharomycetes;o__Saccharomycetales;f__Incertae sedis;g__Debaryomyces	D_0__Bacteria;p__Firmicutes;D_2__Clostridia;D_3__Clostridiales;f__Family XIII	-0.0404569062900228	0.757441014132228	0.912548797270739	1
k__Fungi;p__Basidiomycota;c__Tremellomycetes;o__Filobasidiales;f__Filobasidiaceae;g__Filobasidium	D_0__Bacteria;p__Firmicutes;D_2__Clostridia;D_3__Clostridiales;f__Family XIII	0.00755156258966109	0.448183241428222	0.912548797270739	1
k__Fungi;p__Ascomycota;c__Dothideomycetes;o__Capnodiales;f__Davidiellaceae	D_0__Bacteria;p__Firmicutes;D_2__Clostridia;D_3__Clostridiales;f__Lachnospiraceae	-0.0511317528853142	0.811248962001287	0.912548797270739	-1
k__Fungi;p__Ascomycota;c__Eurotiomycetes;o__Eurotiales;f__Trichocomaceae	D_0__Bacteria;p__Firmicutes;D_2__Clostridia;D_3__Clostridiales;f__Lachnospiraceae	-0.0455389467956146	0.784028959333995	0.912548797270739	1
k__Fungi;p__Ascomycota;c__Saccharomycetes;o__Saccharomycetales;f__Saccharomycetaceae	D_0__Bacteria;p__Firmicutes;D_2__Clostridia;D_3__Clostridiales;f__Lachnospiraceae	0.00291354985613517	0.479960149930314	0.912548797270739	1
k__Fungi;p__Basidiomycota;c__Tremellomycetes;o__Filobasidiales;f__Filobasidiaceae	D_0__Bacteria;p__Firmicutes;D_2__Clostridia;D_3__Clostridiales;f__Lachnospiraceae	-0.0552009760867407	0.829665496388071	0.912548797270739	1
k__Fungi;p__Ascomycota;c__Dothideomycetes;o__Capnodiales;f__Davidiellaceae;g__Davidiella	D_0__Bacteria;p__Firmicutes;D_2__Clostridia;D_3__Clostridiales;f__Lachnospiraceae	-0.0511317528853142	0.811248962001287	0.912548797270739	-1
k__Fungi;p__Ascomycota;c__Eurotiomycetes;o__Eurotiales;f__Trichocomaceae;g__Penicillium	D_0__Bacteria;p__Firmicutes;D_2__Clostridia;D_3__Clostridiales;f__Lachnospiraceae	-0.0455389467956146	0.784028959333995	0.912548797270739	1
k__Fungi;p__Ascomycota;c__Saccharomycetes;o__Saccharomycetales;f__Incertae sedis;g__Candida	D_0__Bacteria;p__Firmicutes;D_2__Clostridia;D_3__Clostridiales;f__Lachnospiraceae	-0.00866467257239433	0.559401830610917	0.912548797270739	-1
k__Fungi;p__Ascomycota;c__Saccharomycetes;o__Saccharomycetales;f__Incertae sedis;g__Debaryomyces	D_0__Bacteria;p__Firmicutes;D_2__Clostridia;D_3__Clostridiales;f__Lachnospiraceae	0.0344093543028593	0.276364659883439	0.912548797270739	-1
k__Fungi;p__Ascomycota;c__Saccharomycetes;o__Saccharomycetales;f__Saccharomycetaceae;g__Saccharomyces	D_0__Bacteria;p__Firmicutes;D_2__Clostridia;D_3__Clostridiales;f__Lachnospiraceae	-0.0117677037119114	0.58042417621399	0.912548797270739	1
k__Fungi;p__Basidiomycota;c__Tremellomycetes;o__Filobasidiales;f__Filobasidiaceae;g__Filobasidium	D_0__Bacteria;p__Firmicutes;D_2__Clostridia;D_3__Clostridiales;f__Lachnospiraceae	-0.0552009760867407	0.829665496388071	0.912548797270739	1
k__Fungi;p__Ascomycota;c__Eurotiomycetes;o__Eurotiales;f__Trichocomaceae	D_0__Bacteria;p__Firmicutes;D_2__Clostridia;D_3__Clostridiales;f__Peptococcaceae	0.0115830704332277	0.420820915555793	0.912548797270739	-1
k__Fungi;p__Ascomycota;c__Saccharomycetes;o__Saccharomycetales;f__Saccharomycetaceae	D_0__Bacteria;p__Firmicutes;D_2__Clostridia;D_3__Clostridiales;f__Peptococcaceae	-0.0118942977819766	0.581277413232052	0.912548797270739	1
k__Fungi;p__Ascomycota;c__Sordariomycetes;o__Hypocreales;f__Cordycipitaceae	D_0__Bacteria;p__Firmicutes;D_2__Clostridia;D_3__Clostridiales;f__Peptococcaceae	-0.0288142210695608	0.690439567665751	0.912548797270739	1
k__Fungi;p__Ascomycota;c__Sordariomycetes;o__Hypocreales;f__Nectriaceae	D_0__Bacteria;p__Firmicutes;D_2__Clostridia;D_3__Clostridiales;f__Peptococcaceae	0.0279053104073466	0.315112510172163	0.912548797270739	1
k__Fungi;p__Basidiomycota;c__Tremellomycetes;o__Filobasidiales;f__Filobasidiaceae	D_0__Bacteria;p__Firmicutes;D_2__Clostridia;D_3__Clostridiales;f__Peptococcaceae	-0.0100972717091248	0.56913179304436	0.912548797270739	-1
k__Fungi;p__Ascomycota;c__Eurotiomycetes;o__Eurotiales;f__Trichocomaceae;g__Penicillium	D_0__Bacteria;p__Firmicutes;D_2__Clostridia;D_3__Clostridiales;f__Peptococcaceae	0.0115830704332277	0.420820915555793	0.912548797270739	-1
k__Fungi;p__Ascomycota;c__Saccharomycetes;o__Saccharomycetales;f__Incertae sedis;g__Candida	D_0__Bacteria;p__Firmicutes;D_2__Clostridia;D_3__Clostridiales;f__Peptococcaceae	0.0125111833326615	0.414570325072812	0.912548797270739	-1
k__Fungi;p__Ascomycota;c__Saccharomycetes;o__Saccharomycetales;f__Incertae sedis;g__Debaryomyces	D_0__Bacteria;p__Firmicutes;D_2__Clostridia;D_3__Clostridiales;f__Peptococcaceae	0.0189554544956869	0.371842692700266	0.912548797270739	-1
k__Fungi;p__Ascomycota;c__Saccharomycetes;o__Saccharomycetales;f__Saccharomycetaceae;g__Saccharomyces	D_0__Bacteria;p__Firmicutes;D_2__Clostridia;D_3__Clostridiales;f__Peptococcaceae	-0.0112317427159002	0.576807705394059	0.912548797270739	1
k__Fungi;p__Ascomycota;c__Sordariomycetes;o__Hypocreales;f__Nectriaceae;g__Fusarium	D_0__Bacteria;p__Firmicutes;D_2__Clostridia;D_3__Clostridiales;f__Peptococcaceae	0.0279053104073466	0.315112510172163	0.912548797270739	1
k__Fungi;p__Basidiomycota;c__Tremellomycetes;o__Filobasidiales;f__Filobasidiaceae;g__Filobasidium	D_0__Bacteria;p__Firmicutes;D_2__Clostridia;D_3__Clostridiales;f__Peptococcaceae	-0.0100972717091248	0.56913179304436	0.912548797270739	-1
k__Fungi;p__Ascomycota;c__Dothideomycetes;o__Capnodiales;f__Davidiellaceae	D_0__Bacteria;p__Firmicutes;D_2__Clostridia;D_3__Clostridiales;f__Peptostreptococcaceae	-0.052641796931015	0.818221043536988	0.912548797270739	-1
k__Fungi;p__Ascomycota;c__Dothideomycetes;o__Pleosporales;f__Pleosporaceae	D_0__Bacteria;p__Firmicutes;D_2__Clostridia;D_3__Clostridiales;f__Peptostreptococcaceae	0.0249030211587526	0.333743705038581	0.912548797270739	-1
k__Fungi;p__Ascomycota;c__Eurotiomycetes;o__Eurotiales;f__Trichocomaceae	D_0__Bacteria;p__Firmicutes;D_2__Clostridia;D_3__Clostridiales;f__Peptostreptococcaceae	-0.0193214984458591	0.630543135648212	0.912548797270739	-1
k__Fungi;p__Ascomycota;c__Saccharomycetes;o__Saccharomycetales;f__Incertae sedis	D_0__Bacteria;p__Firmicutes;D_2__Clostridia;D_3__Clostridiales;f__Peptostreptococcaceae	0.00303548245606358	0.47912222537852	0.912548797270739	-1
k__Fungi;p__Ascomycota;c__Saccharomycetes;o__Saccharomycetales;f__Saccharomycetaceae	D_0__Bacteria;p__Firmicutes;D_2__Clostridia;D_3__Clostridiales;f__Peptostreptococcaceae	-0.0308964315605644	0.702995366866222	0.912548797270739	1
k__Fungi;p__Basidiomycota;c__Tremellomycetes;o__Filobasidiales;f__Filobasidiaceae	D_0__Bacteria;p__Firmicutes;D_2__Clostridia;D_3__Clostridiales;f__Peptostreptococcaceae	0.00663078947689384	0.454472071322263	0.912548797270739	1
k__Fungi;p__Ascomycota;c__Dothideomycetes;o__Capnodiales;f__Davidiellaceae;g__Davidiella	D_0__Bacteria;p__Firmicutes;D_2__Clostridia;D_3__Clostridiales;f__Peptostreptococcaceae	-0.052641796931015	0.818221043536988	0.912548797270739	-1
k__Fungi;p__Ascomycota;c__Dothideomycetes;o__Pleosporales;f__Pleosporaceae;g__Alternaria	D_0__Bacteria;p__Firmicutes;D_2__Clostridia;D_3__Clostridiales;f__Peptostreptococcaceae	0.0249030211587526	0.333743705038581	0.912548797270739	-1
k__Fungi;p__Ascomycota;c__Eurotiomycetes;o__Eurotiales;f__Trichocomaceae;g__Penicillium	D_0__Bacteria;p__Firmicutes;D_2__Clostridia;D_3__Clostridiales;f__Peptostreptococcaceae	-0.0193214984458591	0.630543135648212	0.912548797270739	-1
k__Fungi;p__Ascomycota;c__Saccharomycetes;o__Saccharomycetales;f__Incertae sedis;g__Candida	D_0__Bacteria;p__Firmicutes;D_2__Clostridia;D_3__Clostridiales;f__Peptostreptococcaceae	-0.00610764856020331	0.541949737168756	0.912548797270739	1
k__Fungi;p__Ascomycota;c__Saccharomycetes;o__Saccharomycetales;f__Incertae sedis;g__Debaryomyces	D_0__Bacteria;p__Firmicutes;D_2__Clostridia;D_3__Clostridiales;f__Peptostreptococcaceae	-0.0579935035825458	0.841617148110174	0.912548797270739	-1
k__Fungi;p__Ascomycota;c__Saccharomycetes;o__Saccharomycetales;f__Saccharomycetaceae;g__Saccharomyces	D_0__Bacteria;p__Firmicutes;D_2__Clostridia;D_3__Clostridiales;f__Peptostreptococcaceae	-0.0470798356036797	0.791745623891807	0.912548797270739	1
k__Fungi;p__Basidiomycota;c__Tremellomycetes;o__Filobasidiales;f__Filobasidiaceae;g__Filobasidium	D_0__Bacteria;p__Firmicutes;D_2__Clostridia;D_3__Clostridiales;f__Peptostreptococcaceae	0.00663078947689384	0.454472071322263	0.912548797270739	1
k__Fungi;p__Ascomycota;c__Dothideomycetes;o__Capnodiales;f__Davidiellaceae	D_0__Bacteria;p__Firmicutes;D_2__Clostridia;D_3__Clostridiales;f__Ruminococcaceae	0.0157257267523635	0.393096586423714	0.912548797270739	-1
k__Fungi;p__Ascomycota;c__Dothideomycetes;o__Pleosporales;f__Pleosporaceae	D_0__Bacteria;p__Firmicutes;D_2__Clostridia;D_3__Clostridiales;f__Ruminococcaceae	-0.00756378601541054	0.551900160361362	0.912548797270739	-1
k__Fungi;p__Ascomycota;c__Eurotiomycetes;o__Eurotiales;f__Trichocomaceae	D_0__Bacteria;p__Firmicutes;D_2__Clostridia;D_3__Clostridiales;f__Ruminococcaceae	0.00615668153028325	0.457714737729751	0.912548797270739	1
k__Fungi;p__Ascomycota;c__Saccharomycetes;o__Saccharomycetales;f__Incertae sedis	D_0__Bacteria;p__Firmicutes;D_2__Clostridia;D_3__Clostridiales;f__Ruminococcaceae	0.0322699181004855	0.28885150205931	0.912548797270739	-1
k__Fungi;p__Ascomycota;c__Saccharomycetes;o__Saccharomycetales;f__Saccharomycetaceae	D_0__Bacteria;p__Firmicutes;D_2__Clostridia;D_3__Clostridiales;f__Ruminococcaceae	-0.0519443140435435	0.815020818830436	0.912548797270739	-1
k__Fungi;p__Basidiomycota;c__Tremellomycetes;o__Filobasidiales;f__Filobasidiaceae	D_0__Bacteria;p__Firmicutes;D_2__Clostridia;D_3__Clostridiales;f__Ruminococcaceae	-0.0422171500832922	0.766844601853344	0.912548797270739	-1
k__Fungi;p__Ascomycota;c__Dothideomycetes;o__Capnodiales;f__Davidiellaceae;g__Davidiella	D_0__Bacteria;p__Firmicutes;D_2__Clostridia;D_3__Clostridiales;f__Ruminococcaceae	0.0157257267523635	0.393096586423714	0.912548797270739	-1
k__Fungi;p__Ascomycota;c__Dothideomycetes;o__Pleosporales;f__Pleosporaceae;g__Alternaria	D_0__Bacteria;p__Firmicutes;D_2__Clostridia;D_3__Clostridiales;f__Ruminococcaceae	-0.00756378601541054	0.551900160361362	0.912548797270739	-1
k__Fungi;p__Ascomycota;c__Eurotiomycetes;o__Eurotiales;f__Trichocomaceae;g__Penicillium	D_0__Bacteria;p__Firmicutes;D_2__Clostridia;D_3__Clostridiales;f__Ruminococcaceae	0.00615668153028325	0.457714737729751	0.912548797270739	1
k__Fungi;p__Ascomycota;c__Saccharomycetes;o__Saccharomycetales;f__Incertae sedis;g__Candida	D_0__Bacteria;p__Firmicutes;D_2__Clostridia;D_3__Clostridiales;f__Ruminococcaceae	-0.010455865618121	0.57156101799458	0.912548797270739	-1
k__Fungi;p__Ascomycota;c__Saccharomycetes;o__Saccharomycetales;f__Incertae sedis;g__Debaryomyces	D_0__Bacteria;p__Firmicutes;D_2__Clostridia;D_3__Clostridiales;f__Ruminococcaceae	-0.00194942438221003	0.513411545767533	0.912548797270739	-1
k__Fungi;p__Ascomycota;c__Saccharomycetes;o__Saccharomycetales;f__Saccharomycetaceae;g__Saccharomyces	D_0__Bacteria;p__Firmicutes;D_2__Clostridia;D_3__Clostridiales;f__Ruminococcaceae	-0.0525248882301918	0.817687054887602	0.912548797270739	-1
k__Fungi;p__Basidiomycota;c__Tremellomycetes;o__Filobasidiales;f__Filobasidiaceae;g__Filobasidium	D_0__Bacteria;p__Firmicutes;D_2__Clostridia;D_3__Clostridiales;f__Ruminococcaceae	-0.0422171500832922	0.766844601853344	0.912548797270739	-1
k__Fungi;p__Ascomycota;c__Dothideomycetes;o__Capnodiales;f__Davidiellaceae	D_0__Bacteria;p__Firmicutes;D_2__Clostridia;D_3__Clostridiales;Other	-0.0384852241017991	0.74666985885411	0.912548797270739	1
k__Fungi;p__Ascomycota;c__Eurotiomycetes;o__Eurotiales;f__Trichocomaceae	D_0__Bacteria;p__Firmicutes;D_2__Clostridia;D_3__Clostridiales;Other	-0.0501427398363614	0.806594902424581	0.912548797270739	1
k__Fungi;p__Ascomycota;c__Saccharomycetes;o__Saccharomycetales;f__Incertae sedis	D_0__Bacteria;p__Firmicutes;D_2__Clostridia;D_3__Clostridiales;Other	-0.0418143212657964	0.764710541999747	0.912548797270739	-1
k__Fungi;p__Ascomycota;c__Saccharomycetes;o__Saccharomycetales;f__Saccharomycetaceae	D_0__Bacteria;p__Firmicutes;D_2__Clostridia;D_3__Clostridiales;Other	-0.0177616377169378	0.620342508415254	0.912548797270739	1
k__Fungi;p__Ascomycota;c__Sordariomycetes;o__Hypocreales;f__Nectriaceae	D_0__Bacteria;p__Firmicutes;D_2__Clostridia;D_3__Clostridiales;Other	-0.0658457678359092	0.872221508917745	0.912548797270739	-1
k__Fungi;p__Basidiomycota;c__Tremellomycetes;o__Filobasidiales;f__Filobasidiaceae	D_0__Bacteria;p__Firmicutes;D_2__Clostridia;D_3__Clostridiales;Other	-0.0283509719354301	0.687615108841126	0.912548797270739	1
k__Fungi;p__Ascomycota;c__Dothideomycetes;o__Capnodiales;f__Davidiellaceae;g__Davidiella	D_0__Bacteria;p__Firmicutes;D_2__Clostridia;D_3__Clostridiales;Other	-0.0384852241017991	0.74666985885411	0.912548797270739	1
k__Fungi;p__Ascomycota;c__Eurotiomycetes;o__Eurotiales;f__Trichocomaceae;g__Penicillium	D_0__Bacteria;p__Firmicutes;D_2__Clostridia;D_3__Clostridiales;Other	-0.0501427398363614	0.806594902424581	0.912548797270739	1
k__Fungi;p__Ascomycota;c__Saccharomycetes;o__Saccharomycetales;f__Incertae sedis;g__Candida	D_0__Bacteria;p__Firmicutes;D_2__Clostridia;D_3__Clostridiales;Other	0.0317581897688564	0.291876900196112	0.912548797270739	1
k__Fungi;p__Ascomycota;c__Saccharomycetes;o__Saccharomycetales;f__Saccharomycetaceae;g__Saccharomyces	D_0__Bacteria;p__Firmicutes;D_2__Clostridia;D_3__Clostridiales;Other	-0.0172539479422011	0.617004049277293	0.912548797270739	1
k__Fungi;p__Ascomycota;c__Sordariomycetes;o__Hypocreales;f__Nectriaceae;g__Fusarium	D_0__Bacteria;p__Firmicutes;D_2__Clostridia;D_3__Clostridiales;Other	-0.0658457678359092	0.872221508917745	0.912548797270739	-1
k__Fungi;p__Basidiomycota;c__Tremellomycetes;o__Filobasidiales;f__Filobasidiaceae;g__Filobasidium	D_0__Bacteria;p__Firmicutes;D_2__Clostridia;D_3__Clostridiales;Other	-0.0283509719354301	0.687615108841126	0.912548797270739	1
k__Fungi;p__Ascomycota;c__Dothideomycetes;o__Capnodiales;f__Davidiellaceae	D_0__Bacteria;p__Firmicutes;D_2__Erysipelotrichia;D_3__Erysipelotrichales;f__Erysipelotrichaceae	0.0238926586398596	0.340109532208056	0.912548797270739	-1
k__Fungi;p__Ascomycota;c__Eurotiomycetes;o__Eurotiales;f__Trichocomaceae	D_0__Bacteria;p__Firmicutes;D_2__Erysipelotrichia;D_3__Erysipelotrichales;f__Erysipelotrichaceae	-0.0585140973684703	0.843783167669045	0.912548797270739	-1
k__Fungi;p__Ascomycota;c__Saccharomycetes;o__Saccharomycetales;f__Incertae sedis	D_0__Bacteria;p__Firmicutes;D_2__Erysipelotrichia;D_3__Erysipelotrichales;f__Erysipelotrichaceae	-0.0650574195835786	0.869347881312625	0.912548797270739	-1
k__Fungi;p__Ascomycota;c__Saccharomycetes;o__Saccharomycetales;f__Saccharomycetaceae	D_0__Bacteria;p__Firmicutes;D_2__Erysipelotrichia;D_3__Erysipelotrichales;f__Erysipelotrichaceae	-0.0349290537314419	0.72662831049587	0.912548797270739	1
k__Fungi;p__Basidiomycota;c__Tremellomycetes;o__Filobasidiales;f__Filobasidiaceae	D_0__Bacteria;p__Firmicutes;D_2__Erysipelotrichia;D_3__Erysipelotrichales;f__Erysipelotrichaceae	-0.0143585087167253	0.597805594250648	0.912548797270739	1
k__Fungi;p__Ascomycota;c__Dothideomycetes;o__Capnodiales;f__Davidiellaceae;g__Davidiella	D_0__Bacteria;p__Firmicutes;D_2__Erysipelotrichia;D_3__Erysipelotrichales;f__Erysipelotrichaceae	0.0238926586398596	0.340109532208056	0.912548797270739	-1
k__Fungi;p__Ascomycota;c__Eurotiomycetes;o__Eurotiales;f__Trichocomaceae;g__Penicillium	D_0__Bacteria;p__Firmicutes;D_2__Erysipelotrichia;D_3__Erysipelotrichales;f__Erysipelotrichaceae	-0.0585140973684703	0.843783167669045	0.912548797270739	-1
k__Fungi;p__Ascomycota;c__Saccharomycetes;o__Saccharomycetales;f__Incertae sedis;g__Debaryomyces	D_0__Bacteria;p__Firmicutes;D_2__Erysipelotrichia;D_3__Erysipelotrichales;f__Erysipelotrichaceae	0.0198847291524049	0.365795575675688	0.912548797270739	1
k__Fungi;p__Ascomycota;c__Saccharomycetes;o__Saccharomycetales;f__Saccharomycetaceae;g__Saccharomyces	D_0__Bacteria;p__Firmicutes;D_2__Erysipelotrichia;D_3__Erysipelotrichales;f__Erysipelotrichaceae	-0.0410537674010806	0.760652276711241	0.912548797270739	1
k__Fungi;p__Basidiomycota;c__Tremellomycetes;o__Filobasidiales;f__Filobasidiaceae;g__Filobasidium	D_0__Bacteria;p__Firmicutes;D_2__Erysipelotrichia;D_3__Erysipelotrichales;f__Erysipelotrichaceae	-0.0143585087167253	0.597805594250648	0.912548797270739	1
k__Fungi;p__Ascomycota;c__Dothideomycetes;o__Capnodiales;f__Davidiellaceae	D_0__Bacteria;p__Firmicutes;D_2__Negativicutes;D_3__Selenomonadales;f__Acidaminococcaceae	-0.0220576370610542	0.648213166433165	0.912548797270739	-1
k__Fungi;p__Ascomycota;c__Saccharomycetes;o__Saccharomycetales;f__Saccharomycetaceae	D_0__Bacteria;p__Firmicutes;D_2__Negativicutes;D_3__Selenomonadales;f__Acidaminococcaceae	-0.0480589745013109	0.796563834089392	0.912548797270739	1
k__Fungi;p__Ascomycota;c__Sordariomycetes;o__Hypocreales;f__Cordycipitaceae	D_0__Bacteria;p__Firmicutes;D_2__Negativicutes;D_3__Selenomonadales;f__Acidaminococcaceae	0.02374153137582	0.341065681368085	0.912548797270739	1
k__Fungi;p__Basidiomycota;c__Tremellomycetes;o__Filobasidiales;f__Filobasidiaceae	D_0__Bacteria;p__Firmicutes;D_2__Negativicutes;D_3__Selenomonadales;f__Acidaminococcaceae	-0.00225883101988485	0.515539187011345	0.912548797270739	1
k__Fungi;p__Ascomycota;c__Dothideomycetes;o__Capnodiales;f__Davidiellaceae;g__Davidiella	D_0__Bacteria;p__Firmicutes;D_2__Negativicutes;D_3__Selenomonadales;f__Acidaminococcaceae	-0.0220576370610542	0.648213166433165	0.912548797270739	-1
k__Fungi;p__Ascomycota;c__Saccharomycetes;o__Saccharomycetales;f__Incertae sedis;g__Candida	D_0__Bacteria;p__Firmicutes;D_2__Negativicutes;D_3__Selenomonadales;f__Acidaminococcaceae	0.0282528876939719	0.31298433393716	0.912548797270739	-1
k__Fungi;p__Ascomycota;c__Saccharomycetes;o__Saccharomycetales;f__Incertae sedis;g__Debaryomyces	D_0__Bacteria;p__Firmicutes;D_2__Negativicutes;D_3__Selenomonadales;f__Acidaminococcaceae	0.0087844558806077	0.439783169838265	0.912548797270739	1
k__Fungi;p__Ascomycota;c__Saccharomycetes;o__Saccharomycetales;f__Saccharomycetaceae;g__Saccharomyces	D_0__Bacteria;p__Firmicutes;D_2__Negativicutes;D_3__Selenomonadales;f__Acidaminococcaceae	-0.0470058689628041	0.791378942961181	0.912548797270739	1
k__Fungi;p__Basidiomycota;c__Tremellomycetes;o__Filobasidiales;f__Filobasidiaceae;g__Filobasidium	D_0__Bacteria;p__Firmicutes;D_2__Negativicutes;D_3__Selenomonadales;f__Acidaminococcaceae	-0.00225883101988485	0.515539187011345	0.912548797270739	1
k__Fungi;p__Ascomycota;c__Dothideomycetes;o__Capnodiales;f__Davidiellaceae	D_0__Bacteria;p__Firmicutes;D_2__Negativicutes;D_3__Selenomonadales;f__Veillonellaceae	-0.00112555072470617	0.507744471525709	0.912548797270739	1
k__Fungi;p__Ascomycota;c__Eurotiomycetes;o__Eurotiales;f__Trichocomaceae	D_0__Bacteria;p__Firmicutes;D_2__Negativicutes;D_3__Selenomonadales;f__Veillonellaceae	-0.0350890314752832	0.727546403633475	0.912548797270739	-1
k__Fungi;p__Ascomycota;c__Saccharomycetes;o__Saccharomycetales;f__Incertae sedis	D_0__Bacteria;p__Firmicutes;D_2__Negativicutes;D_3__Selenomonadales;f__Veillonellaceae	-0.000345910396192895	0.502380207989776	0.912548797270739	1
k__Fungi;p__Ascomycota;c__Saccharomycetes;o__Saccharomycetales;f__Saccharomycetaceae	D_0__Bacteria;p__Firmicutes;D_2__Negativicutes;D_3__Selenomonadales;f__Veillonellaceae	-0.0155960913153673	0.606043190507039	0.912548797270739	-1
k__Fungi;p__Ascomycota;c__Sordariomycetes;o__Hypocreales;f__Cordycipitaceae	D_0__Bacteria;p__Firmicutes;D_2__Negativicutes;D_3__Selenomonadales;f__Veillonellaceae	0.0226200089393086	0.348192709985967	0.912548797270739	1
k__Fungi;p__Ascomycota;c__Sordariomycetes;o__Hypocreales;f__Nectriaceae	D_0__Bacteria;p__Firmicutes;D_2__Negativicutes;D_3__Selenomonadales;f__Veillonellaceae	-0.0345496506176182	0.724444885986923	0.912548797270739	1
k__Fungi;p__Ascomycota;c__Dothideomycetes;o__Capnodiales;f__Davidiellaceae;g__Davidiella	D_0__Bacteria;p__Firmicutes;D_2__Negativicutes;D_3__Selenomonadales;f__Veillonellaceae	-0.00112555072470617	0.507744471525709	0.912548797270739	1
k__Fungi;p__Ascomycota;c__Eurotiomycetes;o__Eurotiales;f__Trichocomaceae;g__Penicillium	D_0__Bacteria;p__Firmicutes;D_2__Negativicutes;D_3__Selenomonadales;f__Veillonellaceae	-0.0350890314752832	0.727546403633475	0.912548797270739	-1
k__Fungi;p__Ascomycota;c__Saccharomycetes;o__Saccharomycetales;f__Incertae sedis;g__Candida	D_0__Bacteria;p__Firmicutes;D_2__Negativicutes;D_3__Selenomonadales;f__Veillonellaceae	0.0369976776263594	0.261619043050038	0.912548797270739	-1
k__Fungi;p__Ascomycota;c__Saccharomycetes;o__Saccharomycetales;f__Saccharomycetaceae;g__Saccharomyces	D_0__Bacteria;p__Firmicutes;D_2__Negativicutes;D_3__Selenomonadales;f__Veillonellaceae	-0.0110914763089544	0.575860161408923	0.912548797270739	1
k__Fungi;p__Ascomycota;c__Sordariomycetes;o__Hypocreales;f__Nectriaceae;g__Fusarium	D_0__Bacteria;p__Firmicutes;D_2__Negativicutes;D_3__Selenomonadales;f__Veillonellaceae	-0.0345496506176182	0.724444885986923	0.912548797270739	1
k__Fungi;p__Ascomycota;c__Dothideomycetes;o__Capnodiales;f__Davidiellaceae	D_0__Bacteria;p__Patescibacteria;D_2__Saccharimonadia;D_3__Saccharimonadales;f__Saccharimonadaceae	0.00944105218438866	0.435320320505962	0.912548797270739	-1
k__Fungi;p__Ascomycota;c__Dothideomycetes;o__Pleosporales;f__Pleosporaceae	D_0__Bacteria;p__Patescibacteria;D_2__Saccharimonadia;D_3__Saccharimonadales;f__Saccharimonadaceae	-0.0458856405187387	0.785779402111167	0.912548797270739	-1
k__Fungi;p__Ascomycota;c__Eurotiomycetes;o__Eurotiales;f__Trichocomaceae	D_0__Bacteria;p__Patescibacteria;D_2__Saccharimonadia;D_3__Saccharimonadales;f__Saccharimonadaceae	-0.0442969008363792	0.77769064945152	0.912548797270739	1
k__Fungi;p__Ascomycota;c__Saccharomycetes;o__Saccharomycetales;f__Incertae sedis	D_0__Bacteria;p__Patescibacteria;D_2__Saccharimonadia;D_3__Saccharimonadales;f__Saccharimonadaceae	0.00336320799835552	0.476870550623337	0.912548797270739	-1
k__Fungi;p__Ascomycota;c__Saccharomycetes;o__Saccharomycetales;f__Saccharomycetaceae	D_0__Bacteria;p__Patescibacteria;D_2__Saccharimonadia;D_3__Saccharimonadales;f__Saccharimonadaceae	-0.0589008980119935	0.84537988523865	0.912548797270739	1
k__Fungi;p__Ascomycota;c__Sordariomycetes;o__Hypocreales;f__Cordycipitaceae	D_0__Bacteria;p__Patescibacteria;D_2__Saccharimonadia;D_3__Saccharimonadales;f__Saccharimonadaceae	-0.0133566742902671	0.591105197375672	0.912548797270739	-1
k__Fungi;p__Ascomycota;c__Sordariomycetes;o__Hypocreales;f__Nectriaceae	D_0__Bacteria;p__Patescibacteria;D_2__Saccharimonadia;D_3__Saccharimonadales;f__Saccharimonadaceae	-0.0289922475418376	0.691522048580171	0.912548797270739	1
k__Fungi;p__Basidiomycota;c__Tremellomycetes;o__Filobasidiales;f__Filobasidiaceae	D_0__Bacteria;p__Patescibacteria;D_2__Saccharimonadia;D_3__Saccharimonadales;f__Saccharimonadaceae	-0.0523153933261551	0.816727735673553	0.912548797270739	-1
k__Fungi;p__Ascomycota;c__Dothideomycetes;o__Capnodiales;f__Davidiellaceae;g__Davidiella	D_0__Bacteria;p__Patescibacteria;D_2__Saccharimonadia;D_3__Saccharimonadales;f__Saccharimonadaceae	0.00944105218438866	0.435320320505962	0.912548797270739	-1
k__Fungi;p__Ascomycota;c__Dothideomycetes;o__Pleosporales;f__Pleosporaceae;g__Alternaria	D_0__Bacteria;p__Patescibacteria;D_2__Saccharimonadia;D_3__Saccharimonadales;f__Saccharimonadaceae	-0.0458856405187387	0.785779402111167	0.912548797270739	-1
k__Fungi;p__Ascomycota;c__Eurotiomycetes;o__Eurotiales;f__Trichocomaceae;g__Penicillium	D_0__Bacteria;p__Patescibacteria;D_2__Saccharimonadia;D_3__Saccharimonadales;f__Saccharimonadaceae	-0.0442969008363792	0.77769064945152	0.912548797270739	1
k__Fungi;p__Ascomycota;c__Saccharomycetes;o__Saccharomycetales;f__Incertae sedis;g__Candida	D_0__Bacteria;p__Patescibacteria;D_2__Saccharimonadia;D_3__Saccharimonadales;f__Saccharimonadaceae	-0.0375347330758226	0.741389429296625	0.912548797270739	1
k__Fungi;p__Ascomycota;c__Saccharomycetes;o__Saccharomycetales;f__Incertae sedis;g__Debaryomyces	D_0__Bacteria;p__Patescibacteria;D_2__Saccharimonadia;D_3__Saccharimonadales;f__Saccharimonadaceae	-0.00389198224674835	0.526760872257318	0.912548797270739	-1
k__Fungi;p__Ascomycota;c__Saccharomycetes;o__Saccharomycetales;f__Saccharomycetaceae;g__Saccharomyces	D_0__Bacteria;p__Patescibacteria;D_2__Saccharimonadia;D_3__Saccharimonadales;f__Saccharimonadaceae	-0.0542277076204687	0.825368370004201	0.912548797270739	1
k__Fungi;p__Ascomycota;c__Sordariomycetes;o__Hypocreales;f__Nectriaceae;g__Fusarium	D_0__Bacteria;p__Patescibacteria;D_2__Saccharimonadia;D_3__Saccharimonadales;f__Saccharimonadaceae	-0.0289922475418376	0.691522048580171	0.912548797270739	1
k__Fungi;p__Basidiomycota;c__Tremellomycetes;o__Filobasidiales;f__Filobasidiaceae;g__Filobasidium	D_0__Bacteria;p__Patescibacteria;D_2__Saccharimonadia;D_3__Saccharimonadales;f__Saccharimonadaceae	-0.0523153933261551	0.816727735673553	0.912548797270739	-1
k__Fungi;p__Ascomycota;c__Dothideomycetes;o__Capnodiales;f__Davidiellaceae	D_0__Bacteria;p__Proteobacteria;D_2__Alphaproteobacteria;D_3__Rhodospirillales;f__uncultured	-0.0066756242752621	0.545834423989507	0.912548797270739	-1
k__Fungi;p__Ascomycota;c__Dothideomycetes;o__Pleosporales;f__Pleosporaceae	D_0__Bacteria;p__Proteobacteria;D_2__Alphaproteobacteria;D_3__Rhodospirillales;f__uncultured	0.0161410295325205	0.390344272522406	0.912548797270739	-1
k__Fungi;p__Ascomycota;c__Eurotiomycetes;o__Eurotiales;f__Trichocomaceae	D_0__Bacteria;p__Proteobacteria;D_2__Alphaproteobacteria;D_3__Rhodospirillales;f__uncultured	-0.00899229298905094	0.561630339056627	0.912548797270739	1
k__Fungi;p__Ascomycota;c__Saccharomycetes;o__Saccharomycetales;f__Incertae sedis	D_0__Bacteria;p__Proteobacteria;D_2__Alphaproteobacteria;D_3__Rhodospirillales;f__uncultured	0.00837091972016274	0.442597902102729	0.912548797270739	-1
k__Fungi;p__Ascomycota;c__Sordariomycetes;o__Hypocreales;f__Cordycipitaceae	D_0__Bacteria;p__Proteobacteria;D_2__Alphaproteobacteria;D_3__Rhodospirillales;f__uncultured	0.00661081131216289	0.454608652817668	0.912548797270739	1
k__Fungi;p__Ascomycota;c__Sordariomycetes;o__Hypocreales;f__Nectriaceae	D_0__Bacteria;p__Proteobacteria;D_2__Alphaproteobacteria;D_3__Rhodospirillales;f__uncultured	-0.00225823519435353	0.515535090208186	0.912548797270739	-1
k__Fungi;p__Basidiomycota;c__Tremellomycetes;o__Filobasidiales;f__Filobasidiaceae	D_0__Bacteria;p__Proteobacteria;D_2__Alphaproteobacteria;D_3__Rhodospirillales;f__uncultured	0.00204978856064506	0.485898253309284	0.912548797270739	-1
k__Fungi;p__Ascomycota;c__Dothideomycetes;o__Capnodiales;f__Davidiellaceae;g__Davidiella	D_0__Bacteria;p__Proteobacteria;D_2__Alphaproteobacteria;D_3__Rhodospirillales;f__uncultured	-0.0066756242752621	0.545834423989507	0.912548797270739	-1
k__Fungi;p__Ascomycota;c__Dothideomycetes;o__Pleosporales;f__Pleosporaceae;g__Alternaria	D_0__Bacteria;p__Proteobacteria;D_2__Alphaproteobacteria;D_3__Rhodospirillales;f__uncultured	0.0161410295325205	0.390344272522406	0.912548797270739	-1
k__Fungi;p__Ascomycota;c__Eurotiomycetes;o__Eurotiales;f__Trichocomaceae;g__Penicillium	D_0__Bacteria;p__Proteobacteria;D_2__Alphaproteobacteria;D_3__Rhodospirillales;f__uncultured	-0.00899229298905094	0.561630339056627	0.912548797270739	1
k__Fungi;p__Ascomycota;c__Saccharomycetes;o__Saccharomycetales;f__Incertae sedis;g__Candida	D_0__Bacteria;p__Proteobacteria;D_2__Alphaproteobacteria;D_3__Rhodospirillales;f__uncultured	-0.0245119226566202	0.663797684432517	0.912548797270739	1
k__Fungi;p__Ascomycota;c__Saccharomycetes;o__Saccharomycetales;f__Incertae sedis;g__Debaryomyces	D_0__Bacteria;p__Proteobacteria;D_2__Alphaproteobacteria;D_3__Rhodospirillales;f__uncultured	0.0241640339517466	0.338395168730913	0.912548797270739	-1
k__Fungi;p__Ascomycota;c__Saccharomycetes;o__Saccharomycetales;f__Saccharomycetaceae;g__Saccharomyces	D_0__Bacteria;p__Proteobacteria;D_2__Alphaproteobacteria;D_3__Rhodospirillales;f__uncultured	0.0206554802567436	0.360805002597027	0.912548797270739	1
k__Fungi;p__Ascomycota;c__Sordariomycetes;o__Hypocreales;f__Nectriaceae;g__Fusarium	D_0__Bacteria;p__Proteobacteria;D_2__Alphaproteobacteria;D_3__Rhodospirillales;f__uncultured	-0.00225823519435353	0.515535090208186	0.912548797270739	-1
k__Fungi;p__Basidiomycota;c__Tremellomycetes;o__Filobasidiales;f__Filobasidiaceae;g__Filobasidium	D_0__Bacteria;p__Proteobacteria;D_2__Alphaproteobacteria;D_3__Rhodospirillales;f__uncultured	0.00204978856064506	0.485898253309284	0.912548797270739	-1
k__Fungi;p__Ascomycota;c__Eurotiomycetes;o__Eurotiales;f__Trichocomaceae	D_0__Bacteria;p__Proteobacteria;D_2__Deltaproteobacteria;D_3__Desulfovibrionales;f__Desulfovibrionaceae	-0.0334099325010055	0.717835067121276	0.912548797270739	1
k__Fungi;p__Ascomycota;c__Sordariomycetes;o__Hypocreales;f__Cordycipitaceae	D_0__Bacteria;p__Proteobacteria;D_2__Deltaproteobacteria;D_3__Desulfovibrionales;f__Desulfovibrionaceae	-0.0561054615284169	0.833597976994289	0.912548797270739	1
k__Fungi;p__Ascomycota;c__Sordariomycetes;o__Hypocreales;f__Nectriaceae	D_0__Bacteria;p__Proteobacteria;D_2__Deltaproteobacteria;D_3__Desulfovibrionales;f__Desulfovibrionaceae	-0.0375117415274703	0.741261001594796	0.912548797270739	1
k__Fungi;p__Basidiomycota;c__Tremellomycetes;o__Filobasidiales;f__Filobasidiaceae	D_0__Bacteria;p__Proteobacteria;D_2__Deltaproteobacteria;D_3__Desulfovibrionales;f__Desulfovibrionaceae	-0.00148683676911999	0.510229862297853	0.912548797270739	-1
k__Fungi;p__Ascomycota;c__Eurotiomycetes;o__Eurotiales;f__Trichocomaceae;g__Penicillium	D_0__Bacteria;p__Proteobacteria;D_2__Deltaproteobacteria;D_3__Desulfovibrionales;f__Desulfovibrionaceae	-0.0334099325010055	0.717835067121276	0.912548797270739	1
k__Fungi;p__Ascomycota;c__Saccharomycetes;o__Saccharomycetales;f__Incertae sedis;g__Debaryomyces	D_0__Bacteria;p__Proteobacteria;D_2__Deltaproteobacteria;D_3__Desulfovibrionales;f__Desulfovibrionaceae	-0.00747575222347292	0.551299445278953	0.912548797270739	-1
k__Fungi;p__Ascomycota;c__Saccharomycetes;o__Saccharomycetales;f__Saccharomycetaceae;g__Saccharomyces	D_0__Bacteria;p__Proteobacteria;D_2__Deltaproteobacteria;D_3__Desulfovibrionales;f__Desulfovibrionaceae	0.041857015409822	0.235062770805618	0.912548797270739	1
k__Fungi;p__Ascomycota;c__Sordariomycetes;o__Hypocreales;f__Nectriaceae;g__Fusarium	D_0__Bacteria;p__Proteobacteria;D_2__Deltaproteobacteria;D_3__Desulfovibrionales;f__Desulfovibrionaceae	-0.0375117415274703	0.741261001594796	0.912548797270739	1
k__Fungi;p__Basidiomycota;c__Tremellomycetes;o__Filobasidiales;f__Filobasidiaceae;g__Filobasidium	D_0__Bacteria;p__Proteobacteria;D_2__Deltaproteobacteria;D_3__Desulfovibrionales;f__Desulfovibrionaceae	-0.00148683676911999	0.510229862297853	0.912548797270739	-1
k__Fungi;p__Ascomycota;c__Dothideomycetes;o__Capnodiales;f__Davidiellaceae	D_0__Bacteria;p__Proteobacteria;D_2__Gammaproteobacteria;D_3__Betaproteobacteriales;f__Burkholderiaceae	0.00374403441359785	0.474254967920094	0.912548797270739	-1
k__Fungi;p__Ascomycota;c__Saccharomycetes;o__Saccharomycetales;f__Incertae sedis	D_0__Bacteria;p__Proteobacteria;D_2__Gammaproteobacteria;D_3__Betaproteobacteriales;f__Burkholderiaceae	0.00291209899599253	0.479970120823324	0.912548797270739	-1
k__Fungi;p__Ascomycota;c__Saccharomycetes;o__Saccharomycetales;f__Saccharomycetaceae	D_0__Bacteria;p__Proteobacteria;D_2__Gammaproteobacteria;D_3__Betaproteobacteriales;f__Burkholderiaceae	0.00505244183788114	0.465277696647013	0.912548797270739	1
k__Fungi;p__Basidiomycota;c__Tremellomycetes;o__Filobasidiales;f__Filobasidiaceae	D_0__Bacteria;p__Proteobacteria;D_2__Gammaproteobacteria;D_3__Betaproteobacteriales;f__Burkholderiaceae	-0.0181563105248105	0.622931654156403	0.912548797270739	1
k__Fungi;p__Ascomycota;c__Dothideomycetes;o__Capnodiales;f__Davidiellaceae;g__Davidiella	D_0__Bacteria;p__Proteobacteria;D_2__Gammaproteobacteria;D_3__Betaproteobacteriales;f__Burkholderiaceae	0.00374403441359785	0.474254967920094	0.912548797270739	-1
k__Fungi;p__Ascomycota;c__Saccharomycetes;o__Saccharomycetales;f__Incertae sedis;g__Debaryomyces	D_0__Bacteria;p__Proteobacteria;D_2__Gammaproteobacteria;D_3__Betaproteobacteriales;f__Burkholderiaceae	-0.00896444562583796	0.561440992942141	0.912548797270739	1
k__Fungi;p__Ascomycota;c__Saccharomycetes;o__Saccharomycetales;f__Saccharomycetaceae;g__Saccharomyces	D_0__Bacteria;p__Proteobacteria;D_2__Gammaproteobacteria;D_3__Betaproteobacteriales;f__Burkholderiaceae	0.00689283121958565	0.45268111459274	0.912548797270739	1
k__Fungi;p__Basidiomycota;c__Tremellomycetes;o__Filobasidiales;f__Filobasidiaceae;g__Filobasidium	D_0__Bacteria;p__Proteobacteria;D_2__Gammaproteobacteria;D_3__Betaproteobacteriales;f__Burkholderiaceae	-0.0181563105248105	0.622931654156403	0.912548797270739	1
k__Fungi;p__Ascomycota;c__Dothideomycetes;o__Capnodiales;f__Davidiellaceae	D_0__Bacteria;p__Proteobacteria;D_2__Gammaproteobacteria;D_3__Enterobacteriales;f__Enterobacteriaceae	-0.0040741413052346	0.528011375226875	0.912548797270739	1
k__Fungi;p__Ascomycota;c__Dothideomycetes;o__Pleosporales;f__Pleosporaceae	D_0__Bacteria;p__Proteobacteria;D_2__Gammaproteobacteria;D_3__Enterobacteriales;f__Enterobacteriaceae	-0.0623591226619779	0.859177379787134	0.912548797270739	1
k__Fungi;p__Ascomycota;c__Eurotiomycetes;o__Eurotiales;f__Trichocomaceae	D_0__Bacteria;p__Proteobacteria;D_2__Gammaproteobacteria;D_3__Enterobacteriales;f__Enterobacteriaceae	-0.0290889531325695	0.692109369272736	0.912548797270739	1
k__Fungi;p__Ascomycota;c__Saccharomycetes;o__Saccharomycetales;f__Saccharomycetaceae	D_0__Bacteria;p__Proteobacteria;D_2__Gammaproteobacteria;D_3__Enterobacteriales;f__Enterobacteriaceae	-0.0414658270678921	0.762855707362261	0.912548797270739	1
k__Fungi;p__Ascomycota;c__Sordariomycetes;o__Hypocreales;f__Cordycipitaceae	D_0__Bacteria;p__Proteobacteria;D_2__Gammaproteobacteria;D_3__Enterobacteriales;f__Enterobacteriaceae	-0.0424425458579328	0.768033997031362	0.912548797270739	1
k__Fungi;p__Ascomycota;c__Sordariomycetes;o__Hypocreales;f__Nectriaceae	D_0__Bacteria;p__Proteobacteria;D_2__Gammaproteobacteria;D_3__Enterobacteriales;f__Enterobacteriaceae	-0.0175169692770084	0.618734718209064	0.912548797270739	1
k__Fungi;p__Basidiomycota;c__Tremellomycetes;o__Filobasidiales;f__Filobasidiaceae	D_0__Bacteria;p__Proteobacteria;D_2__Gammaproteobacteria;D_3__Enterobacteriales;f__Enterobacteriaceae	-0.0211761728415305	0.642553216886961	0.912548797270739	-1
k__Fungi;p__Ascomycota;c__Dothideomycetes;o__Capnodiales;f__Davidiellaceae;g__Davidiella	D_0__Bacteria;p__Proteobacteria;D_2__Gammaproteobacteria;D_3__Enterobacteriales;f__Enterobacteriaceae	-0.0040741413052346	0.528011375226875	0.912548797270739	1
k__Fungi;p__Ascomycota;c__Dothideomycetes;o__Pleosporales;f__Pleosporaceae;g__Alternaria	D_0__Bacteria;p__Proteobacteria;D_2__Gammaproteobacteria;D_3__Enterobacteriales;f__Enterobacteriaceae	-0.0623591226619779	0.859177379787134	0.912548797270739	1
k__Fungi;p__Ascomycota;c__Eurotiomycetes;o__Eurotiales;f__Trichocomaceae;g__Penicillium	D_0__Bacteria;p__Proteobacteria;D_2__Gammaproteobacteria;D_3__Enterobacteriales;f__Enterobacteriaceae	-0.0290889531325695	0.692109369272736	0.912548797270739	1
k__Fungi;p__Ascomycota;c__Saccharomycetes;o__Saccharomycetales;f__Incertae sedis;g__Candida	D_0__Bacteria;p__Proteobacteria;D_2__Gammaproteobacteria;D_3__Enterobacteriales;f__Enterobacteriaceae	0.0349922976479767	0.273008558112807	0.912548797270739	1
k__Fungi;p__Ascomycota;c__Saccharomycetes;o__Saccharomycetales;f__Saccharomycetaceae;g__Saccharomyces	D_0__Bacteria;p__Proteobacteria;D_2__Gammaproteobacteria;D_3__Enterobacteriales;f__Enterobacteriaceae	-0.0484997239294746	0.798710926505088	0.912548797270739	1
k__Fungi;p__Ascomycota;c__Sordariomycetes;o__Hypocreales;f__Nectriaceae;g__Fusarium	D_0__Bacteria;p__Proteobacteria;D_2__Gammaproteobacteria;D_3__Enterobacteriales;f__Enterobacteriaceae	-0.0175169692770084	0.618734718209064	0.912548797270739	1
k__Fungi;p__Basidiomycota;c__Tremellomycetes;o__Filobasidiales;f__Filobasidiaceae;g__Filobasidium	D_0__Bacteria;p__Proteobacteria;D_2__Gammaproteobacteria;D_3__Enterobacteriales;f__Enterobacteriaceae	-0.0211761728415305	0.642553216886961	0.912548797270739	-1
k__Fungi;p__Ascomycota;c__Dothideomycetes;o__Capnodiales;f__Davidiellaceae	D_0__Bacteria;p__Proteobacteria;D_2__Gammaproteobacteria;D_3__Pasteurellales;f__Pasteurellaceae	0.0365865829393373	0.263933925237411	0.912548797270739	1
k__Fungi;p__Ascomycota;c__Eurotiomycetes;o__Eurotiales;f__Trichocomaceae	D_0__Bacteria;p__Proteobacteria;D_2__Gammaproteobacteria;D_3__Pasteurellales;f__Pasteurellaceae	-0.0602424256331072	0.850834299785094	0.912548797270739	-1
k__Fungi;p__Ascomycota;c__Saccharomycetes;o__Saccharomycetales;f__Incertae sedis	D_0__Bacteria;p__Proteobacteria;D_2__Gammaproteobacteria;D_3__Pasteurellales;f__Pasteurellaceae	-0.0540560902740295	0.824603611349342	0.912548797270739	1
k__Fungi;p__Ascomycota;c__Saccharomycetes;o__Saccharomycetales;f__Saccharomycetaceae	D_0__Bacteria;p__Proteobacteria;D_2__Gammaproteobacteria;D_3__Pasteurellales;f__Pasteurellaceae	-0.0503428215150038	0.807542017511842	0.912548797270739	-1
k__Fungi;p__Ascomycota;c__Sordariomycetes;o__Hypocreales;f__Cordycipitaceae	D_0__Bacteria;p__Proteobacteria;D_2__Gammaproteobacteria;D_3__Pasteurellales;f__Pasteurellaceae	0.0314043902294544	0.293977153182554	0.912548797270739	-1
k__Fungi;p__Ascomycota;c__Sordariomycetes;o__Hypocreales;f__Nectriaceae	D_0__Bacteria;p__Proteobacteria;D_2__Gammaproteobacteria;D_3__Pasteurellales;f__Pasteurellaceae	0.010853849433463	0.425746076680271	0.912548797270739	-1
k__Fungi;p__Basidiomycota;c__Tremellomycetes;o__Filobasidiales;f__Filobasidiaceae	D_0__Bacteria;p__Proteobacteria;D_2__Gammaproteobacteria;D_3__Pasteurellales;f__Pasteurellaceae	-0.0490819642590528	0.801526469548337	0.912548797270739	0
k__Fungi;p__Ascomycota;c__Dothideomycetes;o__Capnodiales;f__Davidiellaceae;g__Davidiella	D_0__Bacteria;p__Proteobacteria;D_2__Gammaproteobacteria;D_3__Pasteurellales;f__Pasteurellaceae	0.0365865829393373	0.263933925237411	0.912548797270739	1
k__Fungi;p__Ascomycota;c__Eurotiomycetes;o__Eurotiales;f__Trichocomaceae;g__Penicillium	D_0__Bacteria;p__Proteobacteria;D_2__Gammaproteobacteria;D_3__Pasteurellales;f__Pasteurellaceae	-0.0602424256331072	0.850834299785094	0.912548797270739	-1
k__Fungi;p__Ascomycota;c__Saccharomycetes;o__Saccharomycetales;f__Incertae sedis;g__Candida	D_0__Bacteria;p__Proteobacteria;D_2__Gammaproteobacteria;D_3__Pasteurellales;f__Pasteurellaceae	0.00849226138625209	0.441771685134571	0.912548797270739	1
k__Fungi;p__Ascomycota;c__Saccharomycetes;o__Saccharomycetales;f__Incertae sedis;g__Debaryomyces	D_0__Bacteria;p__Proteobacteria;D_2__Gammaproteobacteria;D_3__Pasteurellales;f__Pasteurellaceae	-0.0254932816662504	0.669953482883584	0.912548797270739	1
k__Fungi;p__Ascomycota;c__Saccharomycetes;o__Saccharomycetales;f__Saccharomycetaceae;g__Saccharomyces	D_0__Bacteria;p__Proteobacteria;D_2__Gammaproteobacteria;D_3__Pasteurellales;f__Pasteurellaceae	-0.0517662166403952	0.814198114854427	0.912548797270739	1
k__Fungi;p__Ascomycota;c__Sordariomycetes;o__Hypocreales;f__Nectriaceae;g__Fusarium	D_0__Bacteria;p__Proteobacteria;D_2__Gammaproteobacteria;D_3__Pasteurellales;f__Pasteurellaceae	0.010853849433463	0.425746076680271	0.912548797270739	-1
k__Fungi;p__Basidiomycota;c__Tremellomycetes;o__Filobasidiales;f__Filobasidiaceae;g__Filobasidium	D_0__Bacteria;p__Proteobacteria;D_2__Gammaproteobacteria;D_3__Pasteurellales;f__Pasteurellaceae	-0.0490819642590528	0.801526469548337	0.912548797270739	0
k__Fungi;p__Ascomycota;c__Dothideomycetes;o__Capnodiales;f__Davidiellaceae	D_0__Bacteria;p__Tenericutes;D_2__Mollicutes;D_3__Mollicutes RF39;f__uncultured bacterium	0.011670661869725	0.420230135469372	0.912548797270739	-1
k__Fungi;p__Ascomycota;c__Eurotiomycetes;o__Eurotiales;f__Trichocomaceae	D_0__Bacteria;p__Tenericutes;D_2__Mollicutes;D_3__Mollicutes RF39;f__uncultured bacterium	0.029257597952438	0.306867573816345	0.912548797270739	-1
k__Fungi;p__Ascomycota;c__Saccharomycetes;o__Saccharomycetales;f__Saccharomycetaceae	D_0__Bacteria;p__Tenericutes;D_2__Mollicutes;D_3__Mollicutes RF39;f__uncultured bacterium	-0.0564799136845438	0.835208793190852	0.912548797270739	1
k__Fungi;p__Ascomycota;c__Sordariomycetes;o__Hypocreales;f__Cordycipitaceae	D_0__Bacteria;p__Tenericutes;D_2__Mollicutes;D_3__Mollicutes RF39;f__uncultured bacterium	0.0399629394349971	0.245234108388788	0.912548797270739	1
k__Fungi;p__Ascomycota;c__Sordariomycetes;o__Hypocreales;f__Nectriaceae	D_0__Bacteria;p__Tenericutes;D_2__Mollicutes;D_3__Mollicutes RF39;f__uncultured bacterium	-0.00990568496930906	0.567832852318777	0.912548797270739	1
k__Fungi;p__Ascomycota;c__Dothideomycetes;o__Capnodiales;f__Davidiellaceae;g__Davidiella	D_0__Bacteria;p__Tenericutes;D_2__Mollicutes;D_3__Mollicutes RF39;f__uncultured bacterium	0.011670661869725	0.420230135469372	0.912548797270739	-1
k__Fungi;p__Ascomycota;c__Eurotiomycetes;o__Eurotiales;f__Trichocomaceae;g__Penicillium	D_0__Bacteria;p__Tenericutes;D_2__Mollicutes;D_3__Mollicutes RF39;f__uncultured bacterium	0.029257597952438	0.306867573816345	0.912548797270739	-1
k__Fungi;p__Ascomycota;c__Saccharomycetes;o__Saccharomycetales;f__Incertae sedis;g__Candida	D_0__Bacteria;p__Tenericutes;D_2__Mollicutes;D_3__Mollicutes RF39;f__uncultured bacterium	0.020662768629646	0.360757921583399	0.912548797270739	1
k__Fungi;p__Ascomycota;c__Saccharomycetes;o__Saccharomycetales;f__Incertae sedis;g__Debaryomyces	D_0__Bacteria;p__Tenericutes;D_2__Mollicutes;D_3__Mollicutes RF39;f__uncultured bacterium	0.0203512207658585	0.362772305494856	0.912548797270739	-1
k__Fungi;p__Ascomycota;c__Saccharomycetes;o__Saccharomycetales;f__Saccharomycetaceae;g__Saccharomyces	D_0__Bacteria;p__Tenericutes;D_2__Mollicutes;D_3__Mollicutes RF39;f__uncultured bacterium	-0.0552000761941917	0.82966155461602	0.912548797270739	1
k__Fungi;p__Ascomycota;c__Sordariomycetes;o__Hypocreales;f__Nectriaceae;g__Fusarium	D_0__Bacteria;p__Tenericutes;D_2__Mollicutes;D_3__Mollicutes RF39;f__uncultured bacterium	-0.00990568496930906	0.567832852318777	0.912548797270739	1
k__Fungi;p__Ascomycota;c__Dothideomycetes;o__Capnodiales;f__Davidiellaceae	D_0__Bacteria;p__Verrucomicrobia;D_2__Verrucomicrobiae;D_3__Verrucomicrobiales;f__Akkermansiaceae	-0.0135010569727698	0.592072531953376	0.912548797270739	1
k__Fungi;p__Ascomycota;c__Dothideomycetes;o__Pleosporales;f__Pleosporaceae	D_0__Bacteria;p__Verrucomicrobia;D_2__Verrucomicrobiae;D_3__Verrucomicrobiales;f__Akkermansiaceae	-0.0420289295354298	0.76584880193162	0.912548797270739	1
k__Fungi;p__Ascomycota;c__Eurotiomycetes;o__Eurotiales;f__Trichocomaceae	D_0__Bacteria;p__Verrucomicrobia;D_2__Verrucomicrobiae;D_3__Verrucomicrobiales;f__Akkermansiaceae	-0.0501046317342505	0.806414192069164	0.912548797270739	-1
k__Fungi;p__Ascomycota;c__Saccharomycetes;o__Saccharomycetales;f__Incertae sedis	D_0__Bacteria;p__Verrucomicrobia;D_2__Verrucomicrobiae;D_3__Verrucomicrobiales;f__Akkermansiaceae	-0.0140079753718883	0.595464325232311	0.912548797270739	1
k__Fungi;p__Ascomycota;c__Sordariomycetes;o__Hypocreales;f__Cordycipitaceae	D_0__Bacteria;p__Verrucomicrobia;D_2__Verrucomicrobiae;D_3__Verrucomicrobiales;f__Akkermansiaceae	-0.00888290405628341	0.56088647667097	0.912548797270739	-1
k__Fungi;p__Ascomycota;c__Sordariomycetes;o__Hypocreales;f__Nectriaceae	D_0__Bacteria;p__Verrucomicrobia;D_2__Verrucomicrobiae;D_3__Verrucomicrobiales;f__Akkermansiaceae	-0.0344031857445184	0.723599719324035	0.912548797270739	-1
k__Fungi;p__Basidiomycota;c__Tremellomycetes;o__Filobasidiales;f__Filobasidiaceae	D_0__Bacteria;p__Verrucomicrobia;D_2__Verrucomicrobiae;D_3__Verrucomicrobiales;f__Akkermansiaceae	0.0336621529206428	0.280695652702812	0.912548797270739	1
k__Fungi;p__Ascomycota;c__Dothideomycetes;o__Capnodiales;f__Davidiellaceae;g__Davidiella	D_0__Bacteria;p__Verrucomicrobia;D_2__Verrucomicrobiae;D_3__Verrucomicrobiales;f__Akkermansiaceae	-0.0135010569727698	0.592072531953376	0.912548797270739	1
k__Fungi;p__Ascomycota;c__Dothideomycetes;o__Pleosporales;f__Pleosporaceae;g__Alternaria	D_0__Bacteria;p__Verrucomicrobia;D_2__Verrucomicrobiae;D_3__Verrucomicrobiales;f__Akkermansiaceae	-0.0420289295354298	0.76584880193162	0.912548797270739	1
k__Fungi;p__Ascomycota;c__Eurotiomycetes;o__Eurotiales;f__Trichocomaceae;g__Penicillium	D_0__Bacteria;p__Verrucomicrobia;D_2__Verrucomicrobiae;D_3__Verrucomicrobiales;f__Akkermansiaceae	-0.0501046317342505	0.806414192069164	0.912548797270739	-1
k__Fungi;p__Ascomycota;c__Saccharomycetes;o__Saccharomycetales;f__Incertae sedis;g__Candida	D_0__Bacteria;p__Verrucomicrobia;D_2__Verrucomicrobiae;D_3__Verrucomicrobiales;f__Akkermansiaceae	-0.0262620265250932	0.674743938096908	0.912548797270739	1
k__Fungi;p__Ascomycota;c__Saccharomycetes;o__Saccharomycetales;f__Incertae sedis;g__Debaryomyces	D_0__Bacteria;p__Verrucomicrobia;D_2__Verrucomicrobiae;D_3__Verrucomicrobiales;f__Akkermansiaceae	-0.0411321387431203	0.761072211304354	0.912548797270739	1
k__Fungi;p__Ascomycota;c__Sordariomycetes;o__Hypocreales;f__Nectriaceae;g__Fusarium	D_0__Bacteria;p__Verrucomicrobia;D_2__Verrucomicrobiae;D_3__Verrucomicrobiales;f__Akkermansiaceae	-0.0344031857445184	0.723599719324035	0.912548797270739	-1
k__Fungi;p__Basidiomycota;c__Tremellomycetes;o__Filobasidiales;f__Filobasidiaceae;g__Filobasidium	D_0__Bacteria;p__Verrucomicrobia;D_2__Verrucomicrobiae;D_3__Verrucomicrobiales;f__Akkermansiaceae	0.0336621529206428	0.280695652702812	0.912548797270739	1
k__Fungi;p__Ascomycota;c__Dothideomycetes;o__Capnodiales;f__Davidiellaceae	D_0__Bacteria;Other;Other;Other;Other	-0.0499153983777157	0.805515322237496	0.912548797270739	1
k__Fungi;p__Ascomycota;c__Eurotiomycetes;o__Eurotiales;f__Trichocomaceae	D_0__Bacteria;Other;Other;Other;Other	-0.000575988431361655	0.503963332515424	0.912548797270739	1
k__Fungi;p__Ascomycota;c__Sordariomycetes;o__Hypocreales;f__Cordycipitaceae	D_0__Bacteria;Other;Other;Other;Other	-0.0544111316200964	0.826183408561608	0.912548797270739	-1
k__Fungi;p__Ascomycota;c__Sordariomycetes;o__Hypocreales;f__Nectriaceae	D_0__Bacteria;Other;Other;Other;Other	-0.0638777317232175	0.864965276655204	0.912548797270739	-1
k__Fungi;p__Ascomycota;c__Dothideomycetes;o__Capnodiales;f__Davidiellaceae;g__Davidiella	D_0__Bacteria;Other;Other;Other;Other	-0.0499153983777157	0.805515322237496	0.912548797270739	1
k__Fungi;p__Ascomycota;c__Eurotiomycetes;o__Eurotiales;f__Trichocomaceae;g__Penicillium	D_0__Bacteria;Other;Other;Other;Other	-0.000575988431361655	0.503963332515424	0.912548797270739	1
k__Fungi;p__Ascomycota;c__Saccharomycetes;o__Saccharomycetales;f__Incertae sedis;g__Debaryomyces	D_0__Bacteria;Other;Other;Other;Other	-0.0188056120838478	0.62717923308207	0.912548797270739	1
k__Fungi;p__Ascomycota;c__Saccharomycetes;o__Saccharomycetales;f__Saccharomycetaceae;g__Saccharomyces	D_0__Bacteria;Other;Other;Other;Other	0.0372362580240121	0.260280362715656	0.912548797270739	-1
k__Fungi;p__Ascomycota;c__Sordariomycetes;o__Hypocreales;f__Nectriaceae;g__Fusarium	D_0__Bacteria;Other;Other;Other;Other	-0.0638777317232175	0.864965276655204	0.912548797270739	-1
k__Fungi;p__Ascomycota;c__Dothideomycetes;o__Capnodiales;f__Davidiellaceae	Unassigned;Other;Other;Other;Other	-0.0582946515911956	0.842872504603174	0.912548797270739	1
k__Fungi;p__Ascomycota;c__Dothideomycetes;o__Pleosporales;f__Pleosporaceae	Unassigned;Other;Other;Other;Other	-0.00935043610180502	0.564064241082503	0.912548797270739	1
k__Fungi;p__Ascomycota;c__Eurotiomycetes;o__Eurotiales;f__Trichocomaceae	Unassigned;Other;Other;Other;Other	-0.0396213358082727	0.752906715789628	0.912548797270739	-1
k__Fungi;p__Ascomycota;c__Saccharomycetes;o__Saccharomycetales;f__Incertae sedis	Unassigned;Other;Other;Other;Other	-0.0646808545680941	0.867959683472119	0.912548797270739	1
k__Fungi;p__Ascomycota;c__Saccharomycetes;o__Saccharomycetales;f__Saccharomycetaceae	Unassigned;Other;Other;Other;Other	-0.0287912992717576	0.690300073050672	0.912548797270739	1
k__Fungi;p__Ascomycota;c__Sordariomycetes;o__Hypocreales;f__Cordycipitaceae	Unassigned;Other;Other;Other;Other	-0.0415481618767707	0.763294648091531	0.912548797270739	1
k__Fungi;p__Ascomycota;c__Dothideomycetes;o__Capnodiales;f__Davidiellaceae;g__Davidiella	Unassigned;Other;Other;Other;Other	-0.0582946515911956	0.842872504603174	0.912548797270739	1
k__Fungi;p__Ascomycota;c__Dothideomycetes;o__Pleosporales;f__Pleosporaceae;g__Alternaria	Unassigned;Other;Other;Other;Other	-0.00935043610180502	0.564064241082503	0.912548797270739	1
k__Fungi;p__Ascomycota;c__Eurotiomycetes;o__Eurotiales;f__Trichocomaceae;g__Penicillium	Unassigned;Other;Other;Other;Other	-0.0396213358082727	0.752906715789628	0.912548797270739	-1
k__Fungi;p__Ascomycota;c__Saccharomycetes;o__Saccharomycetales;f__Incertae sedis;g__Candida	Unassigned;Other;Other;Other;Other	-0.00500897673839933	0.534424336594699	0.912548797270739	1
k__Fungi;p__Ascomycota;c__Saccharomycetes;o__Saccharomycetales;f__Incertae sedis;g__Debaryomyces	Unassigned;Other;Other;Other;Other	-0.0201161251372919	0.635705121094733	0.912548797270739	1
k__Fungi;p__Ascomycota;c__Saccharomycetes;o__Saccharomycetales;f__Saccharomycetaceae;g__Saccharomyces	Unassigned;Other;Other;Other;Other	-0.0277659934025758	0.684032745222281	0.912548797270739	1
k__Fungi;p__Ascomycota;c__Eurotiomycetes;o__Eurotiales;f__Trichocomaceae	D_0__Archaea;p__Euryarchaeota;D_2__Methanobacteria;D_3__Methanobacteriales;f__Methanobacteriaceae;g__Methanobrevibacter	-0.0414995509007742	0.763035548572611	0.912548797270739	1
k__Fungi;p__Ascomycota;c__Saccharomycetes;o__Saccharomycetales;f__Saccharomycetaceae	D_0__Archaea;p__Euryarchaeota;D_2__Methanobacteria;D_3__Methanobacteriales;f__Methanobacteriaceae;g__Methanobrevibacter	0.0280276640132715	0.314362651537354	0.912548797270739	1
k__Fungi;p__Ascomycota;c__Sordariomycetes;o__Hypocreales;f__Cordycipitaceae	D_0__Archaea;p__Euryarchaeota;D_2__Methanobacteria;D_3__Methanobacteriales;f__Methanobacteriaceae;g__Methanobrevibacter	-0.0581148393350205	0.8421237299573	0.912548797270739	1
k__Fungi;p__Basidiomycota;c__Tremellomycetes;o__Filobasidiales;f__Filobasidiaceae	D_0__Archaea;p__Euryarchaeota;D_2__Methanobacteria;D_3__Methanobacteriales;f__Methanobacteriaceae;g__Methanobrevibacter	0.00815448976525649	0.44407219098183	0.912548797270739	-1
k__Fungi;p__Ascomycota;c__Eurotiomycetes;o__Eurotiales;f__Trichocomaceae;g__Penicillium	D_0__Archaea;p__Euryarchaeota;D_2__Methanobacteria;D_3__Methanobacteriales;f__Methanobacteriaceae;g__Methanobrevibacter	-0.0414995509007742	0.763035548572611	0.912548797270739	1
k__Fungi;p__Ascomycota;c__Saccharomycetes;o__Saccharomycetales;f__Incertae sedis;g__Candida	D_0__Archaea;p__Euryarchaeota;D_2__Methanobacteria;D_3__Methanobacteriales;f__Methanobacteriaceae;g__Methanobrevibacter	0.0063254057306325	0.456560414428683	0.912548797270739	1
k__Fungi;p__Ascomycota;c__Saccharomycetes;o__Saccharomycetales;f__Incertae sedis;g__Debaryomyces	D_0__Archaea;p__Euryarchaeota;D_2__Methanobacteria;D_3__Methanobacteriales;f__Methanobacteriaceae;g__Methanobrevibacter	0.0167612109911671	0.386244376129104	0.912548797270739	1
k__Fungi;p__Ascomycota;c__Saccharomycetes;o__Saccharomycetales;f__Saccharomycetaceae;g__Saccharomyces	D_0__Archaea;p__Euryarchaeota;D_2__Methanobacteria;D_3__Methanobacteriales;f__Methanobacteriaceae;g__Methanobrevibacter	0.0278477325325323	0.315465645748744	0.912548797270739	1
k__Fungi;p__Basidiomycota;c__Tremellomycetes;o__Filobasidiales;f__Filobasidiaceae;g__Filobasidium	D_0__Archaea;p__Euryarchaeota;D_2__Methanobacteria;D_3__Methanobacteriales;f__Methanobacteriaceae;g__Methanobrevibacter	0.00815448976525649	0.44407219098183	0.912548797270739	-1
k__Fungi;p__Ascomycota;c__Dothideomycetes;o__Capnodiales;f__Davidiellaceae	D_0__Bacteria;p__Actinobacteria;D_2__Actinobacteria;D_3__Actinomycetales;f__Actinomycetaceae;g__Actinomyces	-0.0581409579948442	0.842232637833806	0.912548797270739	-1
k__Fungi;p__Ascomycota;c__Dothideomycetes;o__Pleosporales;f__Pleosporaceae	D_0__Bacteria;p__Actinobacteria;D_2__Actinobacteria;D_3__Actinomycetales;f__Actinomycetaceae;g__Actinomyces	0.0416366246856854	0.236234237707607	0.912548797270739	-1
k__Fungi;p__Ascomycota;c__Eurotiomycetes;o__Eurotiales;f__Trichocomaceae	D_0__Bacteria;p__Actinobacteria;D_2__Actinobacteria;D_3__Actinomycetales;f__Actinomycetaceae;g__Actinomyces	0.0339371994206026	0.279097610865575	0.912548797270739	1
k__Fungi;p__Ascomycota;c__Saccharomycetes;o__Saccharomycetales;f__Incertae sedis	D_0__Bacteria;p__Actinobacteria;D_2__Actinobacteria;D_3__Actinomycetales;f__Actinomycetaceae;g__Actinomyces	-0.00892771154189201	0.561191200821764	0.912548797270739	1
k__Fungi;p__Ascomycota;c__Saccharomycetes;o__Saccharomycetales;f__Saccharomycetaceae	D_0__Bacteria;p__Actinobacteria;D_2__Actinobacteria;D_3__Actinomycetales;f__Actinomycetaceae;g__Actinomyces	-0.0484820833332408	0.798625251602885	0.912548797270739	-1
k__Fungi;p__Basidiomycota;c__Tremellomycetes;o__Filobasidiales;f__Filobasidiaceae	D_0__Bacteria;p__Actinobacteria;D_2__Actinobacteria;D_3__Actinomycetales;f__Actinomycetaceae;g__Actinomyces	-0.0276051920951982	0.683044970947638	0.912548797270739	1
k__Fungi;p__Ascomycota;c__Dothideomycetes;o__Capnodiales;f__Davidiellaceae;g__Davidiella	D_0__Bacteria;p__Actinobacteria;D_2__Actinobacteria;D_3__Actinomycetales;f__Actinomycetaceae;g__Actinomyces	-0.0581409579948442	0.842232637833806	0.912548797270739	-1
k__Fungi;p__Ascomycota;c__Dothideomycetes;o__Pleosporales;f__Pleosporaceae;g__Alternaria	D_0__Bacteria;p__Actinobacteria;D_2__Actinobacteria;D_3__Actinomycetales;f__Actinomycetaceae;g__Actinomyces	0.0416366246856854	0.236234237707607	0.912548797270739	-1
k__Fungi;p__Ascomycota;c__Eurotiomycetes;o__Eurotiales;f__Trichocomaceae;g__Penicillium	D_0__Bacteria;p__Actinobacteria;D_2__Actinobacteria;D_3__Actinomycetales;f__Actinomycetaceae;g__Actinomyces	0.0339371994206026	0.279097610865575	0.912548797270739	1
k__Fungi;p__Ascomycota;c__Saccharomycetes;o__Saccharomycetales;f__Incertae sedis;g__Debaryomyces	D_0__Bacteria;p__Actinobacteria;D_2__Actinobacteria;D_3__Actinomycetales;f__Actinomycetaceae;g__Actinomyces	-0.0191910180261023	0.629693248833682	0.912548797270739	1
k__Fungi;p__Ascomycota;c__Saccharomycetes;o__Saccharomycetales;f__Saccharomycetaceae;g__Saccharomyces	D_0__Bacteria;p__Actinobacteria;D_2__Actinobacteria;D_3__Actinomycetales;f__Actinomycetaceae;g__Actinomyces	-0.0469271508536403	0.790988291546099	0.912548797270739	-1
k__Fungi;p__Basidiomycota;c__Tremellomycetes;o__Filobasidiales;f__Filobasidiaceae;g__Filobasidium	D_0__Bacteria;p__Actinobacteria;D_2__Actinobacteria;D_3__Actinomycetales;f__Actinomycetaceae;g__Actinomyces	-0.0276051920951982	0.683044970947638	0.912548797270739	1
k__Fungi;p__Ascomycota;c__Eurotiomycetes;o__Eurotiales;f__Trichocomaceae	D_0__Bacteria;p__Actinobacteria;D_2__Actinobacteria;D_3__Bifidobacteriales;f__Bifidobacteriaceae;g__Bifidobacterium	-0.04100996896777	0.760417418394332	0.912548797270739	1
k__Fungi;p__Ascomycota;c__Saccharomycetes;o__Saccharomycetales;f__Saccharomycetaceae	D_0__Bacteria;p__Actinobacteria;D_2__Actinobacteria;D_3__Bifidobacteriales;f__Bifidobacteriaceae;g__Bifidobacterium	-0.0302492301389483	0.699117567469087	0.912548797270739	-1
k__Fungi;p__Basidiomycota;c__Tremellomycetes;o__Filobasidiales;f__Filobasidiaceae	D_0__Bacteria;p__Actinobacteria;D_2__Actinobacteria;D_3__Bifidobacteriales;f__Bifidobacteriaceae;g__Bifidobacterium	-0.0600417745164908	0.850026721662813	0.912548797270739	1
k__Fungi;p__Ascomycota;c__Eurotiomycetes;o__Eurotiales;f__Trichocomaceae;g__Penicillium	D_0__Bacteria;p__Actinobacteria;D_2__Actinobacteria;D_3__Bifidobacteriales;f__Bifidobacteriaceae;g__Bifidobacterium	-0.04100996896777	0.760417418394332	0.912548797270739	1
k__Fungi;p__Ascomycota;c__Saccharomycetes;o__Saccharomycetales;f__Incertae sedis;g__Candida	D_0__Bacteria;p__Actinobacteria;D_2__Actinobacteria;D_3__Bifidobacteriales;f__Bifidobacteriaceae;g__Bifidobacterium	-0.0356008522611823	0.730473408600187	0.912548797270739	1
k__Fungi;p__Ascomycota;c__Saccharomycetes;o__Saccharomycetales;f__Saccharomycetaceae;g__Saccharomyces	D_0__Bacteria;p__Actinobacteria;D_2__Actinobacteria;D_3__Bifidobacteriales;f__Bifidobacteriaceae;g__Bifidobacterium	-0.0314614494591871	0.706362036201479	0.912548797270739	-1
k__Fungi;p__Basidiomycota;c__Tremellomycetes;o__Filobasidiales;f__Filobasidiaceae;g__Filobasidium	D_0__Bacteria;p__Actinobacteria;D_2__Actinobacteria;D_3__Bifidobacteriales;f__Bifidobacteriaceae;g__Bifidobacterium	-0.0600417745164908	0.850026721662813	0.912548797270739	1
k__Fungi;p__Ascomycota;c__Dothideomycetes;o__Pleosporales;f__Pleosporaceae	D_0__Bacteria;p__Actinobacteria;D_2__Actinobacteria;D_3__Propionibacteriales;f__Propionibacteriaceae;g__Propionibacterium	-0.0229142613506179	0.653682492171978	0.912548797270739	1
k__Fungi;p__Ascomycota;c__Eurotiomycetes;o__Eurotiales;f__Trichocomaceae	D_0__Bacteria;p__Actinobacteria;D_2__Actinobacteria;D_3__Propionibacteriales;f__Propionibacteriaceae;g__Propionibacterium	-0.0146535093941362	0.599773253383408	0.912548797270739	1
k__Fungi;p__Ascomycota;c__Saccharomycetes;o__Saccharomycetales;f__Incertae sedis	D_0__Bacteria;p__Actinobacteria;D_2__Actinobacteria;D_3__Propionibacteriales;f__Propionibacteriaceae;g__Propionibacterium	0.00909756555148053	0.43765399500908	0.912548797270739	-1
k__Fungi;p__Ascomycota;c__Saccharomycetes;o__Saccharomycetales;f__Saccharomycetaceae	D_0__Bacteria;p__Actinobacteria;D_2__Actinobacteria;D_3__Propionibacteriales;f__Propionibacteriaceae;g__Propionibacterium	0.0195126691956465	0.368212816244055	0.912548797270739	1
k__Fungi;p__Ascomycota;c__Sordariomycetes;o__Hypocreales;f__Cordycipitaceae	D_0__Bacteria;p__Actinobacteria;D_2__Actinobacteria;D_3__Propionibacteriales;f__Propionibacteriaceae;g__Propionibacterium	-0.0578274021704672	0.840921949321496	0.912548797270739	1
k__Fungi;p__Ascomycota;c__Sordariomycetes;o__Hypocreales;f__Nectriaceae	D_0__Bacteria;p__Actinobacteria;D_2__Actinobacteria;D_3__Propionibacteriales;f__Propionibacteriaceae;g__Propionibacterium	-0.0168486884238186	0.614332915756408	0.912548797270739	-1
k__Fungi;p__Ascomycota;c__Dothideomycetes;o__Pleosporales;f__Pleosporaceae;g__Alternaria	D_0__Bacteria;p__Actinobacteria;D_2__Actinobacteria;D_3__Propionibacteriales;f__Propionibacteriaceae;g__Propionibacterium	-0.0229142613506179	0.653682492171978	0.912548797270739	1
k__Fungi;p__Ascomycota;c__Eurotiomycetes;o__Eurotiales;f__Trichocomaceae;g__Penicillium	D_0__Bacteria;p__Actinobacteria;D_2__Actinobacteria;D_3__Propionibacteriales;f__Propionibacteriaceae;g__Propionibacterium	-0.0146535093941362	0.599773253383408	0.912548797270739	1
k__Fungi;p__Ascomycota;c__Saccharomycetes;o__Saccharomycetales;f__Incertae sedis;g__Candida	D_0__Bacteria;p__Actinobacteria;D_2__Actinobacteria;D_3__Propionibacteriales;f__Propionibacteriaceae;g__Propionibacterium	0.0255058874836037	0.329967736851443	0.912548797270739	1
k__Fungi;p__Ascomycota;c__Saccharomycetes;o__Saccharomycetales;f__Incertae sedis;g__Debaryomyces	D_0__Bacteria;p__Actinobacteria;D_2__Actinobacteria;D_3__Propionibacteriales;f__Propionibacteriaceae;g__Propionibacterium	-0.0157213315058172	0.606874256476561	0.912548797270739	1
k__Fungi;p__Ascomycota;c__Saccharomycetes;o__Saccharomycetales;f__Saccharomycetaceae;g__Saccharomyces	D_0__Bacteria;p__Actinobacteria;D_2__Actinobacteria;D_3__Propionibacteriales;f__Propionibacteriaceae;g__Propionibacterium	0.0177186448205845	0.37993986189553	0.912548797270739	1
k__Fungi;p__Ascomycota;c__Sordariomycetes;o__Hypocreales;f__Nectriaceae;g__Fusarium	D_0__Bacteria;p__Actinobacteria;D_2__Actinobacteria;D_3__Propionibacteriales;f__Propionibacteriaceae;g__Propionibacterium	-0.0168486884238186	0.614332915756408	0.912548797270739	-1
k__Fungi;p__Ascomycota;c__Dothideomycetes;o__Capnodiales;f__Davidiellaceae	D_0__Bacteria;p__Actinobacteria;D_2__Coriobacteriia;D_3__Coriobacteriales;f__Atopobiaceae;g__Atopobium	-0.0297383490353086	0.696040602402589	0.912548797270739	1
k__Fungi;p__Ascomycota;c__Dothideomycetes;o__Pleosporales;f__Pleosporaceae	D_0__Bacteria;p__Actinobacteria;D_2__Coriobacteriia;D_3__Coriobacteriales;f__Atopobiaceae;g__Atopobium	-0.0332531421304185	0.716919850625338	0.912548797270739	1
k__Fungi;p__Ascomycota;c__Eurotiomycetes;o__Eurotiales;f__Trichocomaceae	D_0__Bacteria;p__Actinobacteria;D_2__Coriobacteriia;D_3__Coriobacteriales;f__Atopobiaceae;g__Atopobium	-0.0117543989687041	0.580334481057888	0.912548797270739	-1
k__Fungi;p__Ascomycota;c__Saccharomycetes;o__Saccharomycetales;f__Incertae sedis	D_0__Bacteria;p__Actinobacteria;D_2__Coriobacteriia;D_3__Coriobacteriales;f__Atopobiaceae;g__Atopobium	-0.0585791949198537	0.844052644857396	0.912548797270739	1
k__Fungi;p__Ascomycota;c__Saccharomycetes;o__Saccharomycetales;f__Saccharomycetaceae	D_0__Bacteria;p__Actinobacteria;D_2__Coriobacteriia;D_3__Coriobacteriales;f__Atopobiaceae;g__Atopobium	0.0128066651838892	0.412584763584575	0.912548797270739	1
k__Fungi;p__Ascomycota;c__Sordariomycetes;o__Hypocreales;f__Cordycipitaceae	D_0__Bacteria;p__Actinobacteria;D_2__Coriobacteriia;D_3__Coriobacteriales;f__Atopobiaceae;g__Atopobium	0.0125032274729359	0.414623816667643	0.912548797270739	-1
k__Fungi;p__Basidiomycota;c__Tremellomycetes;o__Filobasidiales;f__Filobasidiaceae	D_0__Bacteria;p__Actinobacteria;D_2__Coriobacteriia;D_3__Coriobacteriales;f__Atopobiaceae;g__Atopobium	-0.0193415937299958	0.630673970417956	0.912548797270739	1
k__Fungi;p__Ascomycota;c__Dothideomycetes;o__Capnodiales;f__Davidiellaceae;g__Davidiella	D_0__Bacteria;p__Actinobacteria;D_2__Coriobacteriia;D_3__Coriobacteriales;f__Atopobiaceae;g__Atopobium	-0.0297383490353086	0.696040602402589	0.912548797270739	1
k__Fungi;p__Ascomycota;c__Dothideomycetes;o__Pleosporales;f__Pleosporaceae;g__Alternaria	D_0__Bacteria;p__Actinobacteria;D_2__Coriobacteriia;D_3__Coriobacteriales;f__Atopobiaceae;g__Atopobium	-0.0332531421304185	0.716919850625338	0.912548797270739	1
k__Fungi;p__Ascomycota;c__Eurotiomycetes;o__Eurotiales;f__Trichocomaceae;g__Penicillium	D_0__Bacteria;p__Actinobacteria;D_2__Coriobacteriia;D_3__Coriobacteriales;f__Atopobiaceae;g__Atopobium	-0.0117543989687041	0.580334481057888	0.912548797270739	-1
k__Fungi;p__Ascomycota;c__Saccharomycetes;o__Saccharomycetales;f__Incertae sedis;g__Candida	D_0__Bacteria;p__Actinobacteria;D_2__Coriobacteriia;D_3__Coriobacteriales;f__Atopobiaceae;g__Atopobium	-0.0463203613180761	0.787962642747354	0.912548797270739	-1
k__Fungi;p__Ascomycota;c__Saccharomycetes;o__Saccharomycetales;f__Incertae sedis;g__Debaryomyces	D_0__Bacteria;p__Actinobacteria;D_2__Coriobacteriia;D_3__Coriobacteriales;f__Atopobiaceae;g__Atopobium	-0.011417722381241	0.578063374753214	0.912548797270739	-1
k__Fungi;p__Ascomycota;c__Saccharomycetes;o__Saccharomycetales;f__Saccharomycetaceae;g__Saccharomyces	D_0__Bacteria;p__Actinobacteria;D_2__Coriobacteriia;D_3__Coriobacteriales;f__Atopobiaceae;g__Atopobium	0.029748504716117	0.303898095552851	0.912548797270739	1
k__Fungi;p__Basidiomycota;c__Tremellomycetes;o__Filobasidiales;f__Filobasidiaceae;g__Filobasidium	D_0__Bacteria;p__Actinobacteria;D_2__Coriobacteriia;D_3__Coriobacteriales;f__Atopobiaceae;g__Atopobium	-0.0193415937299958	0.630673970417956	0.912548797270739	1
k__Fungi;p__Ascomycota;c__Dothideomycetes;o__Capnodiales;f__Davidiellaceae	D_0__Bacteria;p__Actinobacteria;D_2__Coriobacteriia;D_3__Coriobacteriales;f__Atopobiaceae;g__Olsenella	0.0127632925934459	0.412876078110798	0.912548797270739	1
k__Fungi;p__Ascomycota;c__Dothideomycetes;o__Pleosporales;f__Pleosporaceae	D_0__Bacteria;p__Actinobacteria;D_2__Coriobacteriia;D_3__Coriobacteriales;f__Atopobiaceae;g__Olsenella	0.00280782071703173	0.480686795267547	0.912548797270739	1
k__Fungi;p__Ascomycota;c__Saccharomycetes;o__Saccharomycetales;f__Incertae sedis	D_0__Bacteria;p__Actinobacteria;D_2__Coriobacteriia;D_3__Coriobacteriales;f__Atopobiaceae;g__Olsenella	0.0404371719563085	0.242665556549343	0.912548797270739	-1
k__Fungi;p__Ascomycota;c__Sordariomycetes;o__Hypocreales;f__Nectriaceae	D_0__Bacteria;p__Actinobacteria;D_2__Coriobacteriia;D_3__Coriobacteriales;f__Atopobiaceae;g__Olsenella	0.0389559892495125	0.250735855810525	0.912548797270739	-1
k__Fungi;p__Basidiomycota;c__Tremellomycetes;o__Filobasidiales;f__Filobasidiaceae	D_0__Bacteria;p__Actinobacteria;D_2__Coriobacteriia;D_3__Coriobacteriales;f__Atopobiaceae;g__Olsenella	-6.23914279709995e-05	0.500429317606751	0.912548797270739	-1
k__Fungi;p__Ascomycota;c__Dothideomycetes;o__Capnodiales;f__Davidiellaceae;g__Davidiella	D_0__Bacteria;p__Actinobacteria;D_2__Coriobacteriia;D_3__Coriobacteriales;f__Atopobiaceae;g__Olsenella	0.0127632925934459	0.412876078110798	0.912548797270739	1
k__Fungi;p__Ascomycota;c__Dothideomycetes;o__Pleosporales;f__Pleosporaceae;g__Alternaria	D_0__Bacteria;p__Actinobacteria;D_2__Coriobacteriia;D_3__Coriobacteriales;f__Atopobiaceae;g__Olsenella	0.00280782071703173	0.480686795267547	0.912548797270739	1
k__Fungi;p__Ascomycota;c__Saccharomycetes;o__Saccharomycetales;f__Incertae sedis;g__Candida	D_0__Bacteria;p__Actinobacteria;D_2__Coriobacteriia;D_3__Coriobacteriales;f__Atopobiaceae;g__Olsenella	0.0025792326491175	0.482258029051533	0.912548797270739	1
k__Fungi;p__Ascomycota;c__Saccharomycetes;o__Saccharomycetales;f__Incertae sedis;g__Debaryomyces	D_0__Bacteria;p__Actinobacteria;D_2__Coriobacteriia;D_3__Coriobacteriales;f__Atopobiaceae;g__Olsenella	0.017558720755139	0.380990775035759	0.912548797270739	-1
k__Fungi;p__Ascomycota;c__Sordariomycetes;o__Hypocreales;f__Nectriaceae;g__Fusarium	D_0__Bacteria;p__Actinobacteria;D_2__Coriobacteriia;D_3__Coriobacteriales;f__Atopobiaceae;g__Olsenella	0.0389559892495125	0.250735855810525	0.912548797270739	-1
k__Fungi;p__Basidiomycota;c__Tremellomycetes;o__Filobasidiales;f__Filobasidiaceae;g__Filobasidium	D_0__Bacteria;p__Actinobacteria;D_2__Coriobacteriia;D_3__Coriobacteriales;f__Atopobiaceae;g__Olsenella	-6.23914279709995e-05	0.500429317606751	0.912548797270739	-1
k__Fungi;p__Ascomycota;c__Dothideomycetes;o__Capnodiales;f__Davidiellaceae	D_0__Bacteria;p__Actinobacteria;D_2__Coriobacteriia;D_3__Coriobacteriales;f__Coriobacteriaceae;g__Collinsella	-0.024152769060227	0.661533733353872	0.912548797270739	-1
k__Fungi;p__Ascomycota;c__Dothideomycetes;o__Pleosporales;f__Pleosporaceae	D_0__Bacteria;p__Actinobacteria;D_2__Coriobacteriia;D_3__Coriobacteriales;f__Coriobacteriaceae;g__Collinsella	0.0428478631882469	0.229835658857788	0.912548797270739	-1
k__Fungi;p__Ascomycota;c__Eurotiomycetes;o__Eurotiales;f__Trichocomaceae	D_0__Bacteria;p__Actinobacteria;D_2__Coriobacteriia;D_3__Coriobacteriales;f__Coriobacteriaceae;g__Collinsella	-0.0660473061157318	0.872949072315001	0.912548797270739	1
k__Fungi;p__Ascomycota;c__Saccharomycetes;o__Saccharomycetales;f__Incertae sedis	D_0__Bacteria;p__Actinobacteria;D_2__Coriobacteriia;D_3__Coriobacteriales;f__Coriobacteriaceae;g__Collinsella	-0.0180354403809126	0.622139295784447	0.912548797270739	-1
k__Fungi;p__Ascomycota;c__Saccharomycetes;o__Saccharomycetales;f__Saccharomycetaceae	D_0__Bacteria;p__Actinobacteria;D_2__Coriobacteriia;D_3__Coriobacteriales;f__Coriobacteriaceae;g__Collinsella	0.000186419597547619	0.498717242156005	0.912548797270739	1
k__Fungi;p__Basidiomycota;c__Tremellomycetes;o__Filobasidiales;f__Filobasidiaceae	D_0__Bacteria;p__Actinobacteria;D_2__Coriobacteriia;D_3__Coriobacteriales;f__Coriobacteriaceae;g__Collinsella	0.0391518251822974	0.249660783501853	0.912548797270739	1
k__Fungi;p__Ascomycota;c__Dothideomycetes;o__Capnodiales;f__Davidiellaceae;g__Davidiella	D_0__Bacteria;p__Actinobacteria;D_2__Coriobacteriia;D_3__Coriobacteriales;f__Coriobacteriaceae;g__Collinsella	-0.024152769060227	0.661533733353872	0.912548797270739	-1
k__Fungi;p__Ascomycota;c__Dothideomycetes;o__Pleosporales;f__Pleosporaceae;g__Alternaria	D_0__Bacteria;p__Actinobacteria;D_2__Coriobacteriia;D_3__Coriobacteriales;f__Coriobacteriaceae;g__Collinsella	0.0428478631882469	0.229835658857788	0.912548797270739	-1
k__Fungi;p__Ascomycota;c__Eurotiomycetes;o__Eurotiales;f__Trichocomaceae;g__Penicillium	D_0__Bacteria;p__Actinobacteria;D_2__Coriobacteriia;D_3__Coriobacteriales;f__Coriobacteriaceae;g__Collinsella	-0.0660473061157318	0.872949072315001	0.912548797270739	1
k__Fungi;p__Ascomycota;c__Saccharomycetes;o__Saccharomycetales;f__Incertae sedis;g__Candida	D_0__Bacteria;p__Actinobacteria;D_2__Coriobacteriia;D_3__Coriobacteriales;f__Coriobacteriaceae;g__Collinsella	-0.046287244213028	0.787796780053429	0.912548797270739	-1
k__Fungi;p__Ascomycota;c__Saccharomycetes;o__Saccharomycetales;f__Incertae sedis;g__Debaryomyces	D_0__Bacteria;p__Actinobacteria;D_2__Coriobacteriia;D_3__Coriobacteriales;f__Coriobacteriaceae;g__Collinsella	-0.0309039807713011	0.703040464556467	0.912548797270739	1
k__Fungi;p__Ascomycota;c__Saccharomycetes;o__Saccharomycetales;f__Saccharomycetaceae;g__Saccharomyces	D_0__Bacteria;p__Actinobacteria;D_2__Coriobacteriia;D_3__Coriobacteriales;f__Coriobacteriaceae;g__Collinsella	-0.00301214438955358	0.520717401705921	0.912548797270739	1
k__Fungi;p__Basidiomycota;c__Tremellomycetes;o__Filobasidiales;f__Filobasidiaceae;g__Filobasidium	D_0__Bacteria;p__Actinobacteria;D_2__Coriobacteriia;D_3__Coriobacteriales;f__Coriobacteriaceae;g__Collinsella	0.0391518251822974	0.249660783501853	0.912548797270739	1
k__Fungi;p__Ascomycota;c__Dothideomycetes;o__Capnodiales;f__Davidiellaceae	D_0__Bacteria;p__Actinobacteria;D_2__Coriobacteriia;D_3__Coriobacteriales;f__Coriobacteriales Incertae Sedis;g__Raoultibacter	0.010908949054437	0.425373520766255	0.912548797270739	-1
k__Fungi;p__Ascomycota;c__Dothideomycetes;o__Pleosporales;f__Pleosporaceae	D_0__Bacteria;p__Actinobacteria;D_2__Coriobacteriia;D_3__Coriobacteriales;f__Coriobacteriales Incertae Sedis;g__Raoultibacter	0.00999085411568105	0.431589617653967	0.912548797270739	1
k__Fungi;p__Ascomycota;c__Eurotiomycetes;o__Eurotiales;f__Trichocomaceae	D_0__Bacteria;p__Actinobacteria;D_2__Coriobacteriia;D_3__Coriobacteriales;f__Coriobacteriales Incertae Sedis;g__Raoultibacter	-0.0503561577938362	0.807605046228451	0.912548797270739	1
k__Fungi;p__Ascomycota;c__Saccharomycetes;o__Saccharomycetales;f__Incertae sedis	D_0__Bacteria;p__Actinobacteria;D_2__Coriobacteriia;D_3__Coriobacteriales;f__Coriobacteriales Incertae Sedis;g__Raoultibacter	-0.0483936243859487	0.798195306112398	0.912548797270739	1
k__Fungi;p__Ascomycota;c__Saccharomycetes;o__Saccharomycetales;f__Saccharomycetaceae	D_0__Bacteria;p__Actinobacteria;D_2__Coriobacteriia;D_3__Coriobacteriales;f__Coriobacteriales Incertae Sedis;g__Raoultibacter	-0.0550767995443436	0.829121020206534	0.912548797270739	1
k__Fungi;p__Ascomycota;c__Sordariomycetes;o__Hypocreales;f__Cordycipitaceae	D_0__Bacteria;p__Actinobacteria;D_2__Coriobacteriia;D_3__Coriobacteriales;f__Coriobacteriales Incertae Sedis;g__Raoultibacter	0.0424922717198361	0.23170405699071	0.912548797270739	-1
k__Fungi;p__Ascomycota;c__Sordariomycetes;o__Hypocreales;f__Nectriaceae	D_0__Bacteria;p__Actinobacteria;D_2__Coriobacteriia;D_3__Coriobacteriales;f__Coriobacteriales Incertae Sedis;g__Raoultibacter	0.0259548527996875	0.327166834864964	0.912548797270739	-1
k__Fungi;p__Basidiomycota;c__Tremellomycetes;o__Filobasidiales;f__Filobasidiaceae	D_0__Bacteria;p__Actinobacteria;D_2__Coriobacteriia;D_3__Coriobacteriales;f__Coriobacteriales Incertae Sedis;g__Raoultibacter	-0.0311134202416373	0.704290375224433	0.912548797270739	1
k__Fungi;p__Ascomycota;c__Dothideomycetes;o__Capnodiales;f__Davidiellaceae;g__Davidiella	D_0__Bacteria;p__Actinobacteria;D_2__Coriobacteriia;D_3__Coriobacteriales;f__Coriobacteriales Incertae Sedis;g__Raoultibacter	0.010908949054437	0.425373520766255	0.912548797270739	-1
k__Fungi;p__Ascomycota;c__Dothideomycetes;o__Pleosporales;f__Pleosporaceae;g__Alternaria	D_0__Bacteria;p__Actinobacteria;D_2__Coriobacteriia;D_3__Coriobacteriales;f__Coriobacteriales Incertae Sedis;g__Raoultibacter	0.00999085411568105	0.431589617653967	0.912548797270739	1
k__Fungi;p__Ascomycota;c__Eurotiomycetes;o__Eurotiales;f__Trichocomaceae;g__Penicillium	D_0__Bacteria;p__Actinobacteria;D_2__Coriobacteriia;D_3__Coriobacteriales;f__Coriobacteriales Incertae Sedis;g__Raoultibacter	-0.0503561577938362	0.807605046228451	0.912548797270739	1
k__Fungi;p__Ascomycota;c__Saccharomycetes;o__Saccharomycetales;f__Incertae sedis;g__Candida	D_0__Bacteria;p__Actinobacteria;D_2__Coriobacteriia;D_3__Coriobacteriales;f__Coriobacteriales Incertae Sedis;g__Raoultibacter	0.0210536909320657	0.35823575712365	0.912548797270739	-1
k__Fungi;p__Ascomycota;c__Saccharomycetes;o__Saccharomycetales;f__Incertae sedis;g__Debaryomyces	D_0__Bacteria;p__Actinobacteria;D_2__Coriobacteriia;D_3__Coriobacteriales;f__Coriobacteriales Incertae Sedis;g__Raoultibacter	-0.0277962271873554	0.68421832043187	0.912548797270739	1
k__Fungi;p__Ascomycota;c__Saccharomycetes;o__Saccharomycetales;f__Saccharomycetaceae;g__Saccharomyces	D_0__Bacteria;p__Actinobacteria;D_2__Coriobacteriia;D_3__Coriobacteriales;f__Coriobacteriales Incertae Sedis;g__Raoultibacter	-0.0528312608798948	0.819084363686065	0.912548797270739	1
k__Fungi;p__Ascomycota;c__Sordariomycetes;o__Hypocreales;f__Nectriaceae;g__Fusarium	D_0__Bacteria;p__Actinobacteria;D_2__Coriobacteriia;D_3__Coriobacteriales;f__Coriobacteriales Incertae Sedis;g__Raoultibacter	0.0259548527996875	0.327166834864964	0.912548797270739	-1
k__Fungi;p__Basidiomycota;c__Tremellomycetes;o__Filobasidiales;f__Filobasidiaceae;g__Filobasidium	D_0__Bacteria;p__Actinobacteria;D_2__Coriobacteriia;D_3__Coriobacteriales;f__Coriobacteriales Incertae Sedis;g__Raoultibacter	-0.0311134202416373	0.704290375224433	0.912548797270739	1
k__Fungi;p__Ascomycota;c__Dothideomycetes;o__Capnodiales;f__Davidiellaceae	D_0__Bacteria;p__Actinobacteria;D_2__Coriobacteriia;D_3__Coriobacteriales;f__Coriobacteriales Incertae Sedis;g__uncultured	0.0189780386425031	0.371695349178015	0.912548797270739	-1
k__Fungi;p__Ascomycota;c__Dothideomycetes;o__Pleosporales;f__Pleosporaceae	D_0__Bacteria;p__Actinobacteria;D_2__Coriobacteriia;D_3__Coriobacteriales;f__Coriobacteriales Incertae Sedis;g__uncultured	-0.00516302343649526	0.535480286855426	0.912548797270739	-1
k__Fungi;p__Ascomycota;c__Eurotiomycetes;o__Eurotiales;f__Trichocomaceae	D_0__Bacteria;p__Actinobacteria;D_2__Coriobacteriia;D_3__Coriobacteriales;f__Coriobacteriales Incertae Sedis;g__uncultured	-0.0550336304244612	0.828931477548513	0.912548797270739	1
k__Fungi;p__Ascomycota;c__Saccharomycetes;o__Saccharomycetales;f__Incertae sedis	D_0__Bacteria;p__Actinobacteria;D_2__Coriobacteriia;D_3__Coriobacteriales;f__Coriobacteriales Incertae Sedis;g__uncultured	-0.0285311331099903	0.688714878643496	0.912548797270739	-1
k__Fungi;p__Ascomycota;c__Saccharomycetes;o__Saccharomycetales;f__Saccharomycetaceae	D_0__Bacteria;p__Actinobacteria;D_2__Coriobacteriia;D_3__Coriobacteriales;f__Coriobacteriales Incertae Sedis;g__uncultured	-0.0237133086038184	0.658755646511722	0.912548797270739	1
k__Fungi;p__Basidiomycota;c__Tremellomycetes;o__Filobasidiales;f__Filobasidiaceae	D_0__Bacteria;p__Actinobacteria;D_2__Coriobacteriia;D_3__Coriobacteriales;f__Coriobacteriales Incertae Sedis;g__uncultured	-0.0297925473318702	0.696367692380271	0.912548797270739	1
k__Fungi;p__Ascomycota;c__Dothideomycetes;o__Capnodiales;f__Davidiellaceae;g__Davidiella	D_0__Bacteria;p__Actinobacteria;D_2__Coriobacteriia;D_3__Coriobacteriales;f__Coriobacteriales Incertae Sedis;g__uncultured	0.0189780386425031	0.371695349178015	0.912548797270739	-1
k__Fungi;p__Ascomycota;c__Dothideomycetes;o__Pleosporales;f__Pleosporaceae;g__Alternaria	D_0__Bacteria;p__Actinobacteria;D_2__Coriobacteriia;D_3__Coriobacteriales;f__Coriobacteriales Incertae Sedis;g__uncultured	-0.00516302343649526	0.535480286855426	0.912548797270739	-1
k__Fungi;p__Ascomycota;c__Eurotiomycetes;o__Eurotiales;f__Trichocomaceae;g__Penicillium	D_0__Bacteria;p__Actinobacteria;D_2__Coriobacteriia;D_3__Coriobacteriales;f__Coriobacteriales Incertae Sedis;g__uncultured	-0.0550336304244612	0.828931477548513	0.912548797270739	1
k__Fungi;p__Ascomycota;c__Saccharomycetes;o__Saccharomycetales;f__Incertae sedis;g__Candida	D_0__Bacteria;p__Actinobacteria;D_2__Coriobacteriia;D_3__Coriobacteriales;f__Coriobacteriales Incertae Sedis;g__uncultured	0.00835479274296551	0.442707729680637	0.912548797270739	-1
k__Fungi;p__Ascomycota;c__Saccharomycetes;o__Saccharomycetales;f__Incertae sedis;g__Debaryomyces	D_0__Bacteria;p__Actinobacteria;D_2__Coriobacteriia;D_3__Coriobacteriales;f__Coriobacteriales Incertae Sedis;g__uncultured	-0.00718520732277633	0.54931603450127	0.912548797270739	1
k__Fungi;p__Ascomycota;c__Saccharomycetes;o__Saccharomycetales;f__Saccharomycetaceae;g__Saccharomyces	D_0__Bacteria;p__Actinobacteria;D_2__Coriobacteriia;D_3__Coriobacteriales;f__Coriobacteriales Incertae Sedis;g__uncultured	-0.0234451354915306	0.657056139701754	0.912548797270739	1
k__Fungi;p__Basidiomycota;c__Tremellomycetes;o__Filobasidiales;f__Filobasidiaceae;g__Filobasidium	D_0__Bacteria;p__Actinobacteria;D_2__Coriobacteriia;D_3__Coriobacteriales;f__Coriobacteriales Incertae Sedis;g__uncultured	-0.0297925473318702	0.696367692380271	0.912548797270739	1
k__Fungi;p__Ascomycota;c__Dothideomycetes;o__Capnodiales;f__Davidiellaceae	D_0__Bacteria;p__Actinobacteria;D_2__Coriobacteriia;D_3__Coriobacteriales;f__Eggerthellaceae;g__Eggerthella	-0.0539616128833559	0.824181702428818	0.912548797270739	-1
k__Fungi;p__Ascomycota;c__Dothideomycetes;o__Pleosporales;f__Pleosporaceae	D_0__Bacteria;p__Actinobacteria;D_2__Coriobacteriia;D_3__Coriobacteriales;f__Eggerthellaceae;g__Eggerthella	-0.0185545120234111	0.625538387046085	0.912548797270739	-1
k__Fungi;p__Ascomycota;c__Eurotiomycetes;o__Eurotiales;f__Trichocomaceae	D_0__Bacteria;p__Actinobacteria;D_2__Coriobacteriia;D_3__Coriobacteriales;f__Eggerthellaceae;g__Eggerthella	0.0016274898604737	0.48880264615234	0.912548797270739	-1
k__Fungi;p__Ascomycota;c__Saccharomycetes;o__Saccharomycetales;f__Incertae sedis	D_0__Bacteria;p__Actinobacteria;D_2__Coriobacteriia;D_3__Coriobacteriales;f__Eggerthellaceae;g__Eggerthella	0.0235780891214113	0.342100888834967	0.912548797270739	1
k__Fungi;p__Ascomycota;c__Sordariomycetes;o__Hypocreales;f__Cordycipitaceae	D_0__Bacteria;p__Actinobacteria;D_2__Coriobacteriia;D_3__Coriobacteriales;f__Eggerthellaceae;g__Eggerthella	0.010414501547223	0.42871905908975	0.912548797270739	-1
k__Fungi;p__Basidiomycota;c__Tremellomycetes;o__Filobasidiales;f__Filobasidiaceae	D_0__Bacteria;p__Actinobacteria;D_2__Coriobacteriia;D_3__Coriobacteriales;f__Eggerthellaceae;g__Eggerthella	0.000712995733575937	0.495093973417885	0.912548797270739	1
k__Fungi;p__Ascomycota;c__Dothideomycetes;o__Capnodiales;f__Davidiellaceae;g__Davidiella	D_0__Bacteria;p__Actinobacteria;D_2__Coriobacteriia;D_3__Coriobacteriales;f__Eggerthellaceae;g__Eggerthella	-0.0539616128833559	0.824181702428818	0.912548797270739	-1
k__Fungi;p__Ascomycota;c__Dothideomycetes;o__Pleosporales;f__Pleosporaceae;g__Alternaria	D_0__Bacteria;p__Actinobacteria;D_2__Coriobacteriia;D_3__Coriobacteriales;f__Eggerthellaceae;g__Eggerthella	-0.0185545120234111	0.625538387046085	0.912548797270739	-1
k__Fungi;p__Ascomycota;c__Eurotiomycetes;o__Eurotiales;f__Trichocomaceae;g__Penicillium	D_0__Bacteria;p__Actinobacteria;D_2__Coriobacteriia;D_3__Coriobacteriales;f__Eggerthellaceae;g__Eggerthella	0.0016274898604737	0.48880264615234	0.912548797270739	-1
k__Fungi;p__Ascomycota;c__Saccharomycetes;o__Saccharomycetales;f__Incertae sedis;g__Debaryomyces	D_0__Bacteria;p__Actinobacteria;D_2__Coriobacteriia;D_3__Coriobacteriales;f__Eggerthellaceae;g__Eggerthella	0.0249049642915802	0.333731507289554	0.912548797270739	1
k__Fungi;p__Basidiomycota;c__Tremellomycetes;o__Filobasidiales;f__Filobasidiaceae;g__Filobasidium	D_0__Bacteria;p__Actinobacteria;D_2__Coriobacteriia;D_3__Coriobacteriales;f__Eggerthellaceae;g__Eggerthella	0.000712995733575937	0.495093973417885	0.912548797270739	1
k__Fungi;p__Ascomycota;c__Dothideomycetes;o__Capnodiales;f__Davidiellaceae	D_0__Bacteria;p__Actinobacteria;D_2__Coriobacteriia;D_3__Coriobacteriales;f__Eggerthellaceae;g__Senegalimassilia	-0.0260114605870505	0.673185634480641	0.912548797270739	1
k__Fungi;p__Ascomycota;c__Dothideomycetes;o__Pleosporales;f__Pleosporaceae	D_0__Bacteria;p__Actinobacteria;D_2__Coriobacteriia;D_3__Coriobacteriales;f__Eggerthellaceae;g__Senegalimassilia	-0.0561646689640901	0.833853346242787	0.912548797270739	1
k__Fungi;p__Ascomycota;c__Eurotiomycetes;o__Eurotiales;f__Trichocomaceae	D_0__Bacteria;p__Actinobacteria;D_2__Coriobacteriia;D_3__Coriobacteriales;f__Eggerthellaceae;g__Senegalimassilia	-0.0394286215138458	0.751854569061798	0.912548797270739	1
k__Fungi;p__Ascomycota;c__Saccharomycetes;o__Saccharomycetales;f__Incertae sedis	D_0__Bacteria;p__Actinobacteria;D_2__Coriobacteriia;D_3__Coriobacteriales;f__Eggerthellaceae;g__Senegalimassilia	-0.0295093046301441	0.694656583006499	0.912548797270739	-1
k__Fungi;p__Ascomycota;c__Saccharomycetes;o__Saccharomycetales;f__Saccharomycetaceae	D_0__Bacteria;p__Actinobacteria;D_2__Coriobacteriia;D_3__Coriobacteriales;f__Eggerthellaceae;g__Senegalimassilia	-0.0119784111661858	0.581844122756333	0.912548797270739	1
k__Fungi;p__Ascomycota;c__Sordariomycetes;o__Hypocreales;f__Cordycipitaceae	D_0__Bacteria;p__Actinobacteria;D_2__Coriobacteriia;D_3__Coriobacteriales;f__Eggerthellaceae;g__Senegalimassilia	-0.0592231195929183	0.846701797593268	0.912548797270739	1
k__Fungi;p__Ascomycota;c__Sordariomycetes;o__Hypocreales;f__Nectriaceae	D_0__Bacteria;p__Actinobacteria;D_2__Coriobacteriia;D_3__Coriobacteriales;f__Eggerthellaceae;g__Senegalimassilia	-0.0527827960337509	0.818863770259181	0.912548797270739	-1
k__Fungi;p__Ascomycota;c__Dothideomycetes;o__Capnodiales;f__Davidiellaceae;g__Davidiella	D_0__Bacteria;p__Actinobacteria;D_2__Coriobacteriia;D_3__Coriobacteriales;f__Eggerthellaceae;g__Senegalimassilia	-0.0260114605870505	0.673185634480641	0.912548797270739	1
k__Fungi;p__Ascomycota;c__Dothideomycetes;o__Pleosporales;f__Pleosporaceae;g__Alternaria	D_0__Bacteria;p__Actinobacteria;D_2__Coriobacteriia;D_3__Coriobacteriales;f__Eggerthellaceae;g__Senegalimassilia	-0.0561646689640901	0.833853346242787	0.912548797270739	1
k__Fungi;p__Ascomycota;c__Eurotiomycetes;o__Eurotiales;f__Trichocomaceae;g__Penicillium	D_0__Bacteria;p__Actinobacteria;D_2__Coriobacteriia;D_3__Coriobacteriales;f__Eggerthellaceae;g__Senegalimassilia	-0.0394286215138458	0.751854569061798	0.912548797270739	1
k__Fungi;p__Ascomycota;c__Saccharomycetes;o__Saccharomycetales;f__Saccharomycetaceae;g__Saccharomyces	D_0__Bacteria;p__Actinobacteria;D_2__Coriobacteriia;D_3__Coriobacteriales;f__Eggerthellaceae;g__Senegalimassilia	-0.0324070096333341	0.711956497957906	0.912548797270739	1
k__Fungi;p__Ascomycota;c__Sordariomycetes;o__Hypocreales;f__Nectriaceae;g__Fusarium	D_0__Bacteria;p__Actinobacteria;D_2__Coriobacteriia;D_3__Coriobacteriales;f__Eggerthellaceae;g__Senegalimassilia	-0.0527827960337509	0.818863770259181	0.912548797270739	-1
k__Fungi;p__Ascomycota;c__Dothideomycetes;o__Capnodiales;f__Davidiellaceae	D_0__Bacteria;p__Actinobacteria;D_2__Coriobacteriia;D_3__Coriobacteriales;f__Eggerthellaceae;g__uncultured	0.00164418914008865	0.488687783301018	0.912548797270739	1
k__Fungi;p__Ascomycota;c__Dothideomycetes;o__Pleosporales;f__Pleosporaceae	D_0__Bacteria;p__Actinobacteria;D_2__Coriobacteriia;D_3__Coriobacteriales;f__Eggerthellaceae;g__uncultured	0.00248976845344766	0.482873050396307	0.912548797270739	1
k__Fungi;p__Ascomycota;c__Eurotiomycetes;o__Eurotiales;f__Trichocomaceae	D_0__Bacteria;p__Actinobacteria;D_2__Coriobacteriia;D_3__Coriobacteriales;f__Eggerthellaceae;g__uncultured	-0.021640830914453	0.645540803818746	0.912548797270739	-1
k__Fungi;p__Ascomycota;c__Sordariomycetes;o__Hypocreales;f__Cordycipitaceae	D_0__Bacteria;p__Actinobacteria;D_2__Coriobacteriia;D_3__Coriobacteriales;f__Eggerthellaceae;g__uncultured	0.044033711463338	0.223665867780043	0.912548797270739	-1
k__Fungi;p__Ascomycota;c__Sordariomycetes;o__Hypocreales;f__Nectriaceae	D_0__Bacteria;p__Actinobacteria;D_2__Coriobacteriia;D_3__Coriobacteriales;f__Eggerthellaceae;g__uncultured	0.0177071270707653	0.380015519416214	0.912548797270739	-1
k__Fungi;p__Ascomycota;c__Dothideomycetes;o__Capnodiales;f__Davidiellaceae;g__Davidiella	D_0__Bacteria;p__Actinobacteria;D_2__Coriobacteriia;D_3__Coriobacteriales;f__Eggerthellaceae;g__uncultured	0.00164418914008865	0.488687783301018	0.912548797270739	1
k__Fungi;p__Ascomycota;c__Dothideomycetes;o__Pleosporales;f__Pleosporaceae;g__Alternaria	D_0__Bacteria;p__Actinobacteria;D_2__Coriobacteriia;D_3__Coriobacteriales;f__Eggerthellaceae;g__uncultured	0.00248976845344766	0.482873050396307	0.912548797270739	1
k__Fungi;p__Ascomycota;c__Eurotiomycetes;o__Eurotiales;f__Trichocomaceae;g__Penicillium	D_0__Bacteria;p__Actinobacteria;D_2__Coriobacteriia;D_3__Coriobacteriales;f__Eggerthellaceae;g__uncultured	-0.021640830914453	0.645540803818746	0.912548797270739	-1
k__Fungi;p__Ascomycota;c__Sordariomycetes;o__Hypocreales;f__Nectriaceae;g__Fusarium	D_0__Bacteria;p__Actinobacteria;D_2__Coriobacteriia;D_3__Coriobacteriales;f__Eggerthellaceae;g__uncultured	0.0177071270707653	0.380015519416214	0.912548797270739	-1
k__Fungi;p__Ascomycota;c__Dothideomycetes;o__Capnodiales;f__Davidiellaceae	D_0__Bacteria;p__Actinobacteria;D_2__Coriobacteriia;D_3__Coriobacteriales;f__uncultured;g__uncultured bacterium	-0.00365059539766719	0.525103374387896	0.912548797270739	1
k__Fungi;p__Ascomycota;c__Dothideomycetes;o__Pleosporales;f__Pleosporaceae	D_0__Bacteria;p__Actinobacteria;D_2__Coriobacteriia;D_3__Coriobacteriales;f__uncultured;g__uncultured bacterium	0.00313208860944901	0.478458409936359	0.912548797270739	-1
k__Fungi;p__Ascomycota;c__Saccharomycetes;o__Saccharomycetales;f__Incertae sedis	D_0__Bacteria;p__Actinobacteria;D_2__Coriobacteriia;D_3__Coriobacteriales;f__uncultured;g__uncultured bacterium	0.0331917547599832	0.283438865364241	0.912548797270739	1
k__Fungi;p__Ascomycota;c__Sordariomycetes;o__Hypocreales;f__Cordycipitaceae	D_0__Bacteria;p__Actinobacteria;D_2__Coriobacteriia;D_3__Coriobacteriales;f__uncultured;g__uncultured bacterium	0.035685343410101	0.269044914877512	0.912548797270739	-1
k__Fungi;p__Ascomycota;c__Sordariomycetes;o__Hypocreales;f__Nectriaceae	D_0__Bacteria;p__Actinobacteria;D_2__Coriobacteriia;D_3__Coriobacteriales;f__uncultured;g__uncultured bacterium	0.0173824012413405	0.382150440877751	0.912548797270739	-1
k__Fungi;p__Basidiomycota;c__Tremellomycetes;o__Filobasidiales;f__Filobasidiaceae	D_0__Bacteria;p__Actinobacteria;D_2__Coriobacteriia;D_3__Coriobacteriales;f__uncultured;g__uncultured bacterium	-0.00309720931036302	0.521301928682848	0.912548797270739	1
k__Fungi;p__Ascomycota;c__Dothideomycetes;o__Capnodiales;f__Davidiellaceae;g__Davidiella	D_0__Bacteria;p__Actinobacteria;D_2__Coriobacteriia;D_3__Coriobacteriales;f__uncultured;g__uncultured bacterium	-0.00365059539766719	0.525103374387896	0.912548797270739	1
k__Fungi;p__Ascomycota;c__Dothideomycetes;o__Pleosporales;f__Pleosporaceae;g__Alternaria	D_0__Bacteria;p__Actinobacteria;D_2__Coriobacteriia;D_3__Coriobacteriales;f__uncultured;g__uncultured bacterium	0.00313208860944901	0.478458409936359	0.912548797270739	-1
k__Fungi;p__Ascomycota;c__Saccharomycetes;o__Saccharomycetales;f__Incertae sedis;g__Candida	D_0__Bacteria;p__Actinobacteria;D_2__Coriobacteriia;D_3__Coriobacteriales;f__uncultured;g__uncultured bacterium	0.000960959283650301	0.493387905380556	0.912548797270739	1
k__Fungi;p__Ascomycota;c__Saccharomycetes;o__Saccharomycetales;f__Incertae sedis;g__Debaryomyces	D_0__Bacteria;p__Actinobacteria;D_2__Coriobacteriia;D_3__Coriobacteriales;f__uncultured;g__uncultured bacterium	0.015914446818868	0.391845223834008	0.912548797270739	1
k__Fungi;p__Ascomycota;c__Sordariomycetes;o__Hypocreales;f__Nectriaceae;g__Fusarium	D_0__Bacteria;p__Actinobacteria;D_2__Coriobacteriia;D_3__Coriobacteriales;f__uncultured;g__uncultured bacterium	0.0173824012413405	0.382150440877751	0.912548797270739	-1
k__Fungi;p__Basidiomycota;c__Tremellomycetes;o__Filobasidiales;f__Filobasidiaceae;g__Filobasidium	D_0__Bacteria;p__Actinobacteria;D_2__Coriobacteriia;D_3__Coriobacteriales;f__uncultured;g__uncultured bacterium	-0.00309720931036302	0.521301928682848	0.912548797270739	1
k__Fungi;p__Ascomycota;c__Dothideomycetes;o__Capnodiales;f__Davidiellaceae	D_0__Bacteria;p__Bacteroidetes;D_2__Bacteroidia;D_3__Bacteroidales;f__Rikenellaceae;g__Alistipes	0.0116442976140596	0.420407936357775	0.912548797270739	-1
k__Fungi;p__Ascomycota;c__Dothideomycetes;o__Pleosporales;f__Pleosporaceae	D_0__Bacteria;p__Bacteroidetes;D_2__Bacteroidia;D_3__Bacteroidales;f__Rikenellaceae;g__Alistipes	-0.00459606667250856	0.531592775492232	0.912548797270739	-1
k__Fungi;p__Ascomycota;c__Eurotiomycetes;o__Eurotiales;f__Trichocomaceae	D_0__Bacteria;p__Bacteroidetes;D_2__Bacteroidia;D_3__Bacteroidales;f__Rikenellaceae;g__Alistipes	-0.0347741829151921	0.725738075798296	0.912548797270739	1
k__Fungi;p__Ascomycota;c__Saccharomycetes;o__Saccharomycetales;f__Incertae sedis	D_0__Bacteria;p__Bacteroidetes;D_2__Bacteroidia;D_3__Bacteroidales;f__Rikenellaceae;g__Alistipes	0.0177627313936438	0.37965030932707	0.912548797270739	1
k__Fungi;p__Ascomycota;c__Saccharomycetes;o__Saccharomycetales;f__Saccharomycetaceae	D_0__Bacteria;p__Bacteroidetes;D_2__Bacteroidia;D_3__Bacteroidales;f__Rikenellaceae;g__Alistipes	0.0172091131703481	0.383291194605941	0.912548797270739	-1
k__Fungi;p__Ascomycota;c__Sordariomycetes;o__Hypocreales;f__Nectriaceae	D_0__Bacteria;p__Bacteroidetes;D_2__Bacteroidia;D_3__Bacteroidales;f__Rikenellaceae;g__Alistipes	-0.0172628823829956	0.617062875872414	0.912548797270739	-1
k__Fungi;p__Basidiomycota;c__Tremellomycetes;o__Filobasidiales;f__Filobasidiaceae	D_0__Bacteria;p__Bacteroidetes;D_2__Bacteroidia;D_3__Bacteroidales;f__Rikenellaceae;g__Alistipes	-0.0470403927925596	0.791550137894044	0.912548797270739	1
k__Fungi;p__Ascomycota;c__Dothideomycetes;o__Capnodiales;f__Davidiellaceae;g__Davidiella	D_0__Bacteria;p__Bacteroidetes;D_2__Bacteroidia;D_3__Bacteroidales;f__Rikenellaceae;g__Alistipes	0.0116442976140596	0.420407936357775	0.912548797270739	-1
k__Fungi;p__Ascomycota;c__Dothideomycetes;o__Pleosporales;f__Pleosporaceae;g__Alternaria	D_0__Bacteria;p__Bacteroidetes;D_2__Bacteroidia;D_3__Bacteroidales;f__Rikenellaceae;g__Alistipes	-0.00459606667250856	0.531592775492232	0.912548797270739	-1
k__Fungi;p__Ascomycota;c__Eurotiomycetes;o__Eurotiales;f__Trichocomaceae;g__Penicillium	D_0__Bacteria;p__Bacteroidetes;D_2__Bacteroidia;D_3__Bacteroidales;f__Rikenellaceae;g__Alistipes	-0.0347741829151921	0.725738075798296	0.912548797270739	1
k__Fungi;p__Ascomycota;c__Saccharomycetes;o__Saccharomycetales;f__Incertae sedis;g__Debaryomyces	D_0__Bacteria;p__Bacteroidetes;D_2__Bacteroidia;D_3__Bacteroidales;f__Rikenellaceae;g__Alistipes	0.0293108861510339	0.306544619845581	0.912548797270739	1
k__Fungi;p__Ascomycota;c__Saccharomycetes;o__Saccharomycetales;f__Saccharomycetaceae;g__Saccharomyces	D_0__Bacteria;p__Bacteroidetes;D_2__Bacteroidia;D_3__Bacteroidales;f__Rikenellaceae;g__Alistipes	0.00590048458941581	0.459468179657905	0.912548797270739	-1
k__Fungi;p__Ascomycota;c__Sordariomycetes;o__Hypocreales;f__Nectriaceae;g__Fusarium	D_0__Bacteria;p__Bacteroidetes;D_2__Bacteroidia;D_3__Bacteroidales;f__Rikenellaceae;g__Alistipes	-0.0172628823829956	0.617062875872414	0.912548797270739	-1
k__Fungi;p__Basidiomycota;c__Tremellomycetes;o__Filobasidiales;f__Filobasidiaceae;g__Filobasidium	D_0__Bacteria;p__Bacteroidetes;D_2__Bacteroidia;D_3__Bacteroidales;f__Rikenellaceae;g__Alistipes	-0.0470403927925596	0.791550137894044	0.912548797270739	1
k__Fungi;p__Ascomycota;c__Eurotiomycetes;o__Eurotiales;f__Trichocomaceae	D_0__Bacteria;p__Bacteroidetes;D_2__Bacteroidia;D_3__Bacteroidales;f__Tannerellaceae;g__Parabacteroides	-0.0513736283008316	0.812376631419162	0.912548797270739	1
k__Fungi;p__Ascomycota;c__Saccharomycetes;o__Saccharomycetales;f__Incertae sedis	D_0__Bacteria;p__Bacteroidetes;D_2__Bacteroidia;D_3__Bacteroidales;f__Tannerellaceae;g__Parabacteroides	-0.0361608766254733	0.733658014483241	0.912548797270739	1
k__Fungi;p__Ascomycota;c__Saccharomycetes;o__Saccharomycetales;f__Saccharomycetaceae	D_0__Bacteria;p__Bacteroidetes;D_2__Bacteroidia;D_3__Bacteroidales;f__Tannerellaceae;g__Parabacteroides	-0.0128540603408795	0.587733513967994	0.912548797270739	-1
k__Fungi;p__Ascomycota;c__Sordariomycetes;o__Hypocreales;f__Cordycipitaceae	D_0__Bacteria;p__Bacteroidetes;D_2__Bacteroidia;D_3__Bacteroidales;f__Tannerellaceae;g__Parabacteroides	0.027891416400039	0.315197709273502	0.912548797270739	1
k__Fungi;p__Ascomycota;c__Sordariomycetes;o__Hypocreales;f__Nectriaceae	D_0__Bacteria;p__Bacteroidetes;D_2__Bacteroidia;D_3__Bacteroidales;f__Tannerellaceae;g__Parabacteroides	-0.040938688399965	0.760034926433585	0.912548797270739	1
k__Fungi;p__Basidiomycota;c__Tremellomycetes;o__Filobasidiales;f__Filobasidiaceae	D_0__Bacteria;p__Bacteroidetes;D_2__Bacteroidia;D_3__Bacteroidales;f__Tannerellaceae;g__Parabacteroides	0.0260221491647965	0.326747830150816	0.912548797270739	1
k__Fungi;p__Ascomycota;c__Eurotiomycetes;o__Eurotiales;f__Trichocomaceae;g__Penicillium	D_0__Bacteria;p__Bacteroidetes;D_2__Bacteroidia;D_3__Bacteroidales;f__Tannerellaceae;g__Parabacteroides	-0.0513736283008316	0.812376631419162	0.912548797270739	1
k__Fungi;p__Ascomycota;c__Saccharomycetes;o__Saccharomycetales;f__Incertae sedis;g__Candida	D_0__Bacteria;p__Bacteroidetes;D_2__Bacteroidia;D_3__Bacteroidales;f__Tannerellaceae;g__Parabacteroides	0.0263313159554779	0.324825676108744	0.912548797270739	-1
k__Fungi;p__Ascomycota;c__Saccharomycetes;o__Saccharomycetales;f__Incertae sedis;g__Debaryomyces	D_0__Bacteria;p__Bacteroidetes;D_2__Bacteroidia;D_3__Bacteroidales;f__Tannerellaceae;g__Parabacteroides	0.00764787700643255	0.447526139537732	0.912548797270739	1
k__Fungi;p__Ascomycota;c__Saccharomycetes;o__Saccharomycetales;f__Saccharomycetaceae;g__Saccharomyces	D_0__Bacteria;p__Bacteroidetes;D_2__Bacteroidia;D_3__Bacteroidales;f__Tannerellaceae;g__Parabacteroides	-0.0194963416347677	0.631680985244372	0.912548797270739	-1
k__Fungi;p__Ascomycota;c__Sordariomycetes;o__Hypocreales;f__Nectriaceae;g__Fusarium	D_0__Bacteria;p__Bacteroidetes;D_2__Bacteroidia;D_3__Bacteroidales;f__Tannerellaceae;g__Parabacteroides	-0.040938688399965	0.760034926433585	0.912548797270739	1
k__Fungi;p__Basidiomycota;c__Tremellomycetes;o__Filobasidiales;f__Filobasidiaceae;g__Filobasidium	D_0__Bacteria;p__Bacteroidetes;D_2__Bacteroidia;D_3__Bacteroidales;f__Tannerellaceae;g__Parabacteroides	0.0260221491647965	0.326747830150816	0.912548797270739	1
k__Fungi;p__Ascomycota;c__Dothideomycetes;o__Capnodiales;f__Davidiellaceae	D_0__Bacteria;p__Bacteroidetes;D_2__Bacteroidia;D_3__Flavobacteriales;f__Flavobacteriaceae;g__uncultured	-0.00592042333155825	0.540668312029923	0.912548797270739	-1
k__Fungi;p__Ascomycota;c__Dothideomycetes;o__Pleosporales;f__Pleosporaceae	D_0__Bacteria;p__Bacteroidetes;D_2__Bacteroidia;D_3__Flavobacteriales;f__Flavobacteriaceae;g__uncultured	-0.0132052960363838	0.590090400756532	0.912548797270739	-1
k__Fungi;p__Ascomycota;c__Eurotiomycetes;o__Eurotiales;f__Trichocomaceae	D_0__Bacteria;p__Bacteroidetes;D_2__Bacteroidia;D_3__Flavobacteriales;f__Flavobacteriaceae;g__uncultured	0.00772972620067154	0.446967838679324	0.912548797270739	1
k__Fungi;p__Ascomycota;c__Saccharomycetes;o__Saccharomycetales;f__Incertae sedis	D_0__Bacteria;p__Bacteroidetes;D_2__Bacteroidia;D_3__Flavobacteriales;f__Flavobacteriaceae;g__uncultured	0.0414251307723151	0.237361415645499	0.912548797270739	-1
k__Fungi;p__Ascomycota;c__Saccharomycetes;o__Saccharomycetales;f__Saccharomycetaceae	D_0__Bacteria;p__Bacteroidetes;D_2__Bacteroidia;D_3__Flavobacteriales;f__Flavobacteriaceae;g__uncultured	0.00142602186110517	0.490188475928996	0.912548797270739	1
k__Fungi;p__Ascomycota;c__Sordariomycetes;o__Hypocreales;f__Cordycipitaceae	D_0__Bacteria;p__Bacteroidetes;D_2__Bacteroidia;D_3__Flavobacteriales;f__Flavobacteriaceae;g__uncultured	-0.0381628225053127	0.744885107156726	0.912548797270739	1
k__Fungi;p__Ascomycota;c__Sordariomycetes;o__Hypocreales;f__Nectriaceae	D_0__Bacteria;p__Bacteroidetes;D_2__Bacteroidia;D_3__Flavobacteriales;f__Flavobacteriaceae;g__uncultured	-0.0147512128234312	0.600424384338088	0.912548797270739	1
k__Fungi;p__Basidiomycota;c__Tremellomycetes;o__Filobasidiales;f__Filobasidiaceae	D_0__Bacteria;p__Bacteroidetes;D_2__Bacteroidia;D_3__Flavobacteriales;f__Flavobacteriaceae;g__uncultured	-0.0412404960775994	0.761652157985831	0.912548797270739	1
k__Fungi;p__Ascomycota;c__Dothideomycetes;o__Capnodiales;f__Davidiellaceae;g__Davidiella	D_0__Bacteria;p__Bacteroidetes;D_2__Bacteroidia;D_3__Flavobacteriales;f__Flavobacteriaceae;g__uncultured	-0.00592042333155825	0.540668312029923	0.912548797270739	-1
k__Fungi;p__Ascomycota;c__Dothideomycetes;o__Pleosporales;f__Pleosporaceae;g__Alternaria	D_0__Bacteria;p__Bacteroidetes;D_2__Bacteroidia;D_3__Flavobacteriales;f__Flavobacteriaceae;g__uncultured	-0.0132052960363838	0.590090400756532	0.912548797270739	-1
k__Fungi;p__Ascomycota;c__Eurotiomycetes;o__Eurotiales;f__Trichocomaceae;g__Penicillium	D_0__Bacteria;p__Bacteroidetes;D_2__Bacteroidia;D_3__Flavobacteriales;f__Flavobacteriaceae;g__uncultured	0.00772972620067154	0.446967838679324	0.912548797270739	1
k__Fungi;p__Ascomycota;c__Saccharomycetes;o__Saccharomycetales;f__Incertae sedis;g__Candida	D_0__Bacteria;p__Bacteroidetes;D_2__Bacteroidia;D_3__Flavobacteriales;f__Flavobacteriaceae;g__uncultured	-0.00176541097815814	0.51214598971681	0.912548797270739	-1
k__Fungi;p__Ascomycota;c__Saccharomycetes;o__Saccharomycetales;f__Incertae sedis;g__Debaryomyces	D_0__Bacteria;p__Bacteroidetes;D_2__Bacteroidia;D_3__Flavobacteriales;f__Flavobacteriaceae;g__uncultured	0.011874155940334	0.418858316327332	0.912548797270739	1
k__Fungi;p__Ascomycota;c__Saccharomycetes;o__Saccharomycetales;f__Saccharomycetaceae;g__Saccharomyces	D_0__Bacteria;p__Bacteroidetes;D_2__Bacteroidia;D_3__Flavobacteriales;f__Flavobacteriaceae;g__uncultured	0.00203562062408784	0.485995683210081	0.912548797270739	1
k__Fungi;p__Ascomycota;c__Sordariomycetes;o__Hypocreales;f__Nectriaceae;g__Fusarium	D_0__Bacteria;p__Bacteroidetes;D_2__Bacteroidia;D_3__Flavobacteriales;f__Flavobacteriaceae;g__uncultured	-0.0147512128234312	0.600424384338088	0.912548797270739	1
k__Fungi;p__Basidiomycota;c__Tremellomycetes;o__Filobasidiales;f__Filobasidiaceae;g__Filobasidium	D_0__Bacteria;p__Bacteroidetes;D_2__Bacteroidia;D_3__Flavobacteriales;f__Flavobacteriaceae;g__uncultured	-0.0412404960775994	0.761652157985831	0.912548797270739	1
k__Fungi;p__Ascomycota;c__Dothideomycetes;o__Capnodiales;f__Davidiellaceae	D_0__Bacteria;p__Firmicutes;D_2__Bacilli;D_3__Bacillales;f__Family XI;g__Gemella	-0.0159538784562432	0.608416098889999	0.912548797270739	1
k__Fungi;p__Ascomycota;c__Dothideomycetes;o__Pleosporales;f__Pleosporaceae	D_0__Bacteria;p__Firmicutes;D_2__Bacilli;D_3__Bacillales;f__Family XI;g__Gemella	0.00638053542528262	0.456183324269864	0.912548797270739	1
k__Fungi;p__Ascomycota;c__Eurotiomycetes;o__Eurotiales;f__Trichocomaceae	D_0__Bacteria;p__Firmicutes;D_2__Bacilli;D_3__Bacillales;f__Family XI;g__Gemella	-0.0277417740308382	0.683884053230688	0.912548797270739	1
k__Fungi;p__Ascomycota;c__Saccharomycetes;o__Saccharomycetales;f__Saccharomycetaceae	D_0__Bacteria;p__Firmicutes;D_2__Bacilli;D_3__Bacillales;f__Family XI;g__Gemella	-0.0465865787950645	0.789293215212669	0.912548797270739	1
k__Fungi;p__Basidiomycota;c__Tremellomycetes;o__Filobasidiales;f__Filobasidiaceae	D_0__Bacteria;p__Firmicutes;D_2__Bacilli;D_3__Bacillales;f__Family XI;g__Gemella	-0.0572434901137501	0.838462289378971	0.912548797270739	1
k__Fungi;p__Ascomycota;c__Dothideomycetes;o__Capnodiales;f__Davidiellaceae;g__Davidiella	D_0__Bacteria;p__Firmicutes;D_2__Bacilli;D_3__Bacillales;f__Family XI;g__Gemella	-0.0159538784562432	0.608416098889999	0.912548797270739	1
k__Fungi;p__Ascomycota;c__Dothideomycetes;o__Pleosporales;f__Pleosporaceae;g__Alternaria	D_0__Bacteria;p__Firmicutes;D_2__Bacilli;D_3__Bacillales;f__Family XI;g__Gemella	0.00638053542528262	0.456183324269864	0.912548797270739	1
k__Fungi;p__Ascomycota;c__Eurotiomycetes;o__Eurotiales;f__Trichocomaceae;g__Penicillium	D_0__Bacteria;p__Firmicutes;D_2__Bacilli;D_3__Bacillales;f__Family XI;g__Gemella	-0.0277417740308382	0.683884053230688	0.912548797270739	1
k__Fungi;p__Ascomycota;c__Saccharomycetes;o__Saccharomycetales;f__Incertae sedis;g__Candida	D_0__Bacteria;p__Firmicutes;D_2__Bacilli;D_3__Bacillales;f__Family XI;g__Gemella	-0.0317739367789044	0.708216416602437	0.912548797270739	1
k__Fungi;p__Ascomycota;c__Saccharomycetes;o__Saccharomycetales;f__Incertae sedis;g__Debaryomyces	D_0__Bacteria;p__Firmicutes;D_2__Bacilli;D_3__Bacillales;f__Family XI;g__Gemella	-0.000441303589199649	0.503036596902397	0.912548797270739	1
k__Fungi;p__Ascomycota;c__Saccharomycetes;o__Saccharomycetales;f__Saccharomycetaceae;g__Saccharomyces	D_0__Bacteria;p__Firmicutes;D_2__Bacilli;D_3__Bacillales;f__Family XI;g__Gemella	-0.0450278227855754	0.78143333569578	0.912548797270739	1
k__Fungi;p__Basidiomycota;c__Tremellomycetes;o__Filobasidiales;f__Filobasidiaceae;g__Filobasidium	D_0__Bacteria;p__Firmicutes;D_2__Bacilli;D_3__Bacillales;f__Family XI;g__Gemella	-0.0572434901137501	0.838462289378971	0.912548797270739	1
k__Fungi;p__Ascomycota;c__Dothideomycetes;o__Capnodiales;f__Davidiellaceae	D_0__Bacteria;p__Firmicutes;D_2__Bacilli;D_3__Lactobacillales;f__Enterococcaceae;g__Enterococcus	0.0193309910315722	0.369395058907969	0.912548797270739	1
k__Fungi;p__Ascomycota;c__Dothideomycetes;o__Pleosporales;f__Pleosporaceae	D_0__Bacteria;p__Firmicutes;D_2__Bacilli;D_3__Lactobacillales;f__Enterococcaceae;g__Enterococcus	-0.022630402571647	0.651873589493079	0.912548797270739	-1
k__Fungi;p__Ascomycota;c__Eurotiomycetes;o__Eurotiales;f__Trichocomaceae	D_0__Bacteria;p__Firmicutes;D_2__Bacilli;D_3__Lactobacillales;f__Enterococcaceae;g__Enterococcus	0.00905900138878278	0.437916139207612	0.912548797270739	1
k__Fungi;p__Ascomycota;c__Saccharomycetes;o__Saccharomycetales;f__Incertae sedis	D_0__Bacteria;p__Firmicutes;D_2__Bacilli;D_3__Lactobacillales;f__Enterococcaceae;g__Enterococcus	0.0232064157830105	0.344459376350402	0.912548797270739	-1
k__Fungi;p__Ascomycota;c__Saccharomycetes;o__Saccharomycetales;f__Saccharomycetaceae	D_0__Bacteria;p__Firmicutes;D_2__Bacilli;D_3__Lactobacillales;f__Enterococcaceae;g__Enterococcus	0.0175160165423542	0.381271546505318	0.912548797270739	1
k__Fungi;p__Ascomycota;c__Sordariomycetes;o__Hypocreales;f__Cordycipitaceae	D_0__Bacteria;p__Firmicutes;D_2__Bacilli;D_3__Lactobacillales;f__Enterococcaceae;g__Enterococcus	0.000393757018149282	0.497290564335093	0.912548797270739	-1
k__Fungi;p__Ascomycota;c__Sordariomycetes;o__Hypocreales;f__Nectriaceae	D_0__Bacteria;p__Firmicutes;D_2__Bacilli;D_3__Lactobacillales;f__Enterococcaceae;g__Enterococcus	0.028661215335165	0.310492091656867	0.912548797270739	-1
k__Fungi;p__Basidiomycota;c__Tremellomycetes;o__Filobasidiales;f__Filobasidiaceae	D_0__Bacteria;p__Firmicutes;D_2__Bacilli;D_3__Lactobacillales;f__Enterococcaceae;g__Enterococcus	0.0253315084975933	0.331058185807498	0.912548797270739	1
k__Fungi;p__Ascomycota;c__Dothideomycetes;o__Capnodiales;f__Davidiellaceae;g__Davidiella	D_0__Bacteria;p__Firmicutes;D_2__Bacilli;D_3__Lactobacillales;f__Enterococcaceae;g__Enterococcus	0.0193309910315722	0.369395058907969	0.912548797270739	1
k__Fungi;p__Ascomycota;c__Dothideomycetes;o__Pleosporales;f__Pleosporaceae;g__Alternaria	D_0__Bacteria;p__Firmicutes;D_2__Bacilli;D_3__Lactobacillales;f__Enterococcaceae;g__Enterococcus	-0.022630402571647	0.651873589493079	0.912548797270739	-1
k__Fungi;p__Ascomycota;c__Eurotiomycetes;o__Eurotiales;f__Trichocomaceae;g__Penicillium	D_0__Bacteria;p__Firmicutes;D_2__Bacilli;D_3__Lactobacillales;f__Enterococcaceae;g__Enterococcus	0.00905900138878278	0.437916139207612	0.912548797270739	1
k__Fungi;p__Ascomycota;c__Saccharomycetes;o__Saccharomycetales;f__Incertae sedis;g__Candida	D_0__Bacteria;p__Firmicutes;D_2__Bacilli;D_3__Lactobacillales;f__Enterococcaceae;g__Enterococcus	0.00286512328893347	0.480292963432751	0.912548797270739	-1
k__Fungi;p__Ascomycota;c__Saccharomycetes;o__Saccharomycetales;f__Saccharomycetaceae;g__Saccharomyces	D_0__Bacteria;p__Firmicutes;D_2__Bacilli;D_3__Lactobacillales;f__Enterococcaceae;g__Enterococcus	0.0223456589846142	0.349944412328741	0.912548797270739	1
k__Fungi;p__Ascomycota;c__Sordariomycetes;o__Hypocreales;f__Nectriaceae;g__Fusarium	D_0__Bacteria;p__Firmicutes;D_2__Bacilli;D_3__Lactobacillales;f__Enterococcaceae;g__Enterococcus	0.028661215335165	0.310492091656867	0.912548797270739	-1
k__Fungi;p__Basidiomycota;c__Tremellomycetes;o__Filobasidiales;f__Filobasidiaceae;g__Filobasidium	D_0__Bacteria;p__Firmicutes;D_2__Bacilli;D_3__Lactobacillales;f__Enterococcaceae;g__Enterococcus	0.0253315084975933	0.331058185807498	0.912548797270739	1
k__Fungi;p__Ascomycota;c__Dothideomycetes;o__Capnodiales;f__Davidiellaceae	D_0__Bacteria;p__Firmicutes;D_2__Bacilli;D_3__Lactobacillales;f__Streptococcaceae;g__Lactococcus	0.0077008448320232	0.447164829261931	0.912548797270739	1
k__Fungi;p__Ascomycota;c__Dothideomycetes;o__Pleosporales;f__Pleosporaceae	D_0__Bacteria;p__Firmicutes;D_2__Bacilli;D_3__Lactobacillales;f__Streptococcaceae;g__Lactococcus	0.0178189327459893	0.379281286454869	0.912548797270739	-1
k__Fungi;p__Ascomycota;c__Eurotiomycetes;o__Eurotiales;f__Trichocomaceae	D_0__Bacteria;p__Firmicutes;D_2__Bacilli;D_3__Lactobacillales;f__Streptococcaceae;g__Lactococcus	-0.0360502244109202	0.73303029021148	0.912548797270739	1
k__Fungi;p__Ascomycota;c__Saccharomycetes;o__Saccharomycetales;f__Incertae sedis	D_0__Bacteria;p__Firmicutes;D_2__Bacilli;D_3__Lactobacillales;f__Streptococcaceae;g__Lactococcus	-0.0111197804569617	0.576051400214772	0.912548797270739	-1
k__Fungi;p__Basidiomycota;c__Tremellomycetes;o__Filobasidiales;f__Filobasidiaceae	D_0__Bacteria;p__Firmicutes;D_2__Bacilli;D_3__Lactobacillales;f__Streptococcaceae;g__Lactococcus	-0.0254460643173668	0.669658330650518	0.912548797270739	1
k__Fungi;p__Ascomycota;c__Dothideomycetes;o__Capnodiales;f__Davidiellaceae;g__Davidiella	D_0__Bacteria;p__Firmicutes;D_2__Bacilli;D_3__Lactobacillales;f__Streptococcaceae;g__Lactococcus	0.0077008448320232	0.447164829261931	0.912548797270739	1
k__Fungi;p__Ascomycota;c__Dothideomycetes;o__Pleosporales;f__Pleosporaceae;g__Alternaria	D_0__Bacteria;p__Firmicutes;D_2__Bacilli;D_3__Lactobacillales;f__Streptococcaceae;g__Lactococcus	0.0178189327459893	0.379281286454869	0.912548797270739	-1
k__Fungi;p__Ascomycota;c__Eurotiomycetes;o__Eurotiales;f__Trichocomaceae;g__Penicillium	D_0__Bacteria;p__Firmicutes;D_2__Bacilli;D_3__Lactobacillales;f__Streptococcaceae;g__Lactococcus	-0.0360502244109202	0.73303029021148	0.912548797270739	1
k__Fungi;p__Ascomycota;c__Saccharomycetes;o__Saccharomycetales;f__Incertae sedis;g__Candida	D_0__Bacteria;p__Firmicutes;D_2__Bacilli;D_3__Lactobacillales;f__Streptococcaceae;g__Lactococcus	0.0368501440233956	0.262448613375935	0.912548797270739	-1
k__Fungi;p__Ascomycota;c__Saccharomycetes;o__Saccharomycetales;f__Incertae sedis;g__Debaryomyces	D_0__Bacteria;p__Firmicutes;D_2__Bacilli;D_3__Lactobacillales;f__Streptococcaceae;g__Lactococcus	-0.0301428739214221	0.698478151637893	0.912548797270739	1
k__Fungi;p__Basidiomycota;c__Tremellomycetes;o__Filobasidiales;f__Filobasidiaceae;g__Filobasidium	D_0__Bacteria;p__Firmicutes;D_2__Bacilli;D_3__Lactobacillales;f__Streptococcaceae;g__Lactococcus	-0.0254460643173668	0.669658330650518	0.912548797270739	1
k__Fungi;p__Ascomycota;c__Dothideomycetes;o__Pleosporales;f__Pleosporaceae	D_0__Bacteria;p__Firmicutes;D_2__Bacilli;D_3__Lactobacillales;f__Streptococcaceae;g__Streptococcus	-0.042393081070733	0.767773263646484	0.912548797270739	-1
k__Fungi;p__Ascomycota;c__Eurotiomycetes;o__Eurotiales;f__Trichocomaceae	D_0__Bacteria;p__Firmicutes;D_2__Bacilli;D_3__Lactobacillales;f__Streptococcaceae;g__Streptococcus	-0.000344508882362692	0.502370564292133	0.912548797270739	1
k__Fungi;p__Ascomycota;c__Saccharomycetes;o__Saccharomycetales;f__Saccharomycetaceae	D_0__Bacteria;p__Firmicutes;D_2__Bacilli;D_3__Lactobacillales;f__Streptococcaceae;g__Streptococcus	-0.00823779719438039	0.556495379214843	0.912548797270739	1
k__Fungi;p__Basidiomycota;c__Tremellomycetes;o__Filobasidiales;f__Filobasidiaceae	D_0__Bacteria;p__Firmicutes;D_2__Bacilli;D_3__Lactobacillales;f__Streptococcaceae;g__Streptococcus	-0.00063493990962378	0.50436895776021	0.912548797270739	1
k__Fungi;p__Ascomycota;c__Dothideomycetes;o__Pleosporales;f__Pleosporaceae;g__Alternaria	D_0__Bacteria;p__Firmicutes;D_2__Bacilli;D_3__Lactobacillales;f__Streptococcaceae;g__Streptococcus	-0.042393081070733	0.767773263646484	0.912548797270739	-1
k__Fungi;p__Ascomycota;c__Eurotiomycetes;o__Eurotiales;f__Trichocomaceae;g__Penicillium	D_0__Bacteria;p__Firmicutes;D_2__Bacilli;D_3__Lactobacillales;f__Streptococcaceae;g__Streptococcus	-0.000344508882362692	0.502370564292133	0.912548797270739	1
k__Fungi;p__Ascomycota;c__Saccharomycetes;o__Saccharomycetales;f__Saccharomycetaceae;g__Saccharomyces	D_0__Bacteria;p__Firmicutes;D_2__Bacilli;D_3__Lactobacillales;f__Streptococcaceae;g__Streptococcus	-0.0114852265997826	0.578518944981792	0.912548797270739	1
k__Fungi;p__Basidiomycota;c__Tremellomycetes;o__Filobasidiales;f__Filobasidiaceae;g__Filobasidium	D_0__Bacteria;p__Firmicutes;D_2__Bacilli;D_3__Lactobacillales;f__Streptococcaceae;g__Streptococcus	-0.00063493990962378	0.50436895776021	0.912548797270739	1
k__Fungi;p__Ascomycota;c__Dothideomycetes;o__Pleosporales;f__Pleosporaceae	D_0__Bacteria;p__Firmicutes;D_2__Clostridia;D_3__Clostridiales;f__Christensenellaceae;g__Catabacter	0.0185866998716341	0.374251150116788	0.912548797270739	-1
k__Fungi;p__Ascomycota;c__Eurotiomycetes;o__Eurotiales;f__Trichocomaceae	D_0__Bacteria;p__Firmicutes;D_2__Clostridia;D_3__Clostridiales;f__Christensenellaceae;g__Catabacter	-0.0294246261185319	0.694144202994135	0.912548797270739	1
k__Fungi;p__Ascomycota;c__Saccharomycetes;o__Saccharomycetales;f__Incertae sedis	D_0__Bacteria;p__Firmicutes;D_2__Clostridia;D_3__Clostridiales;f__Christensenellaceae;g__Catabacter	-0.0502676126843899	0.807186337237386	0.912548797270739	1
k__Fungi;p__Ascomycota;c__Saccharomycetes;o__Saccharomycetales;f__Saccharomycetaceae	D_0__Bacteria;p__Firmicutes;D_2__Clostridia;D_3__Clostridiales;f__Christensenellaceae;g__Catabacter	0.00544861142937906	0.462562744459747	0.912548797270739	1
k__Fungi;p__Basidiomycota;c__Tremellomycetes;o__Filobasidiales;f__Filobasidiaceae	D_0__Bacteria;p__Firmicutes;D_2__Clostridia;D_3__Clostridiales;f__Christensenellaceae;g__Catabacter	-0.0398554902696904	0.754181908060798	0.912548797270739	1
k__Fungi;p__Ascomycota;c__Dothideomycetes;o__Pleosporales;f__Pleosporaceae;g__Alternaria	D_0__Bacteria;p__Firmicutes;D_2__Clostridia;D_3__Clostridiales;f__Christensenellaceae;g__Catabacter	0.0185866998716341	0.374251150116788	0.912548797270739	-1
k__Fungi;p__Ascomycota;c__Eurotiomycetes;o__Eurotiales;f__Trichocomaceae;g__Penicillium	D_0__Bacteria;p__Firmicutes;D_2__Clostridia;D_3__Clostridiales;f__Christensenellaceae;g__Catabacter	-0.0294246261185319	0.694144202994135	0.912548797270739	1
k__Fungi;p__Ascomycota;c__Saccharomycetes;o__Saccharomycetales;f__Incertae sedis;g__Candida	D_0__Bacteria;p__Firmicutes;D_2__Clostridia;D_3__Clostridiales;f__Christensenellaceae;g__Catabacter	0.0166200689623762	0.387176346041417	0.912548797270739	-1
k__Fungi;p__Ascomycota;c__Saccharomycetes;o__Saccharomycetales;f__Incertae sedis;g__Debaryomyces	D_0__Bacteria;p__Firmicutes;D_2__Clostridia;D_3__Clostridiales;f__Christensenellaceae;g__Catabacter	-0.0438414147814075	0.775340052958386	0.912548797270739	1
k__Fungi;p__Ascomycota;c__Saccharomycetes;o__Saccharomycetales;f__Saccharomycetaceae;g__Saccharomyces	D_0__Bacteria;p__Firmicutes;D_2__Clostridia;D_3__Clostridiales;f__Christensenellaceae;g__Catabacter	-6.83571818523151e-05	0.500470368150597	0.912548797270739	1
k__Fungi;p__Basidiomycota;c__Tremellomycetes;o__Filobasidiales;f__Filobasidiaceae;g__Filobasidium	D_0__Bacteria;p__Firmicutes;D_2__Clostridia;D_3__Clostridiales;f__Christensenellaceae;g__Catabacter	-0.0398554902696904	0.754181908060798	0.912548797270739	1
k__Fungi;p__Ascomycota;c__Dothideomycetes;o__Capnodiales;f__Davidiellaceae	D_0__Bacteria;p__Firmicutes;D_2__Clostridia;D_3__Clostridiales;f__Christensenellaceae;g__Christensenellaceae R-7 group	-0.000221934575623951	0.501527136190594	0.912548797270739	1
k__Fungi;p__Ascomycota;c__Dothideomycetes;o__Pleosporales;f__Pleosporaceae	D_0__Bacteria;p__Firmicutes;D_2__Clostridia;D_3__Clostridiales;f__Christensenellaceae;g__Christensenellaceae R-7 group	-0.0249710087318101	0.66668297356821	0.912548797270739	-1
k__Fungi;p__Ascomycota;c__Eurotiomycetes;o__Eurotiales;f__Trichocomaceae	D_0__Bacteria;p__Firmicutes;D_2__Clostridia;D_3__Clostridiales;f__Christensenellaceae;g__Christensenellaceae R-7 group	-0.0502635514089258	0.807167119145757	0.912548797270739	1
k__Fungi;p__Ascomycota;c__Sordariomycetes;o__Hypocreales;f__Cordycipitaceae	D_0__Bacteria;p__Firmicutes;D_2__Clostridia;D_3__Clostridiales;f__Christensenellaceae;g__Christensenellaceae R-7 group	-0.0201969037275664	0.636228517312531	0.912548797270739	1
k__Fungi;p__Ascomycota;c__Sordariomycetes;o__Hypocreales;f__Nectriaceae	D_0__Bacteria;p__Firmicutes;D_2__Clostridia;D_3__Clostridiales;f__Christensenellaceae;g__Christensenellaceae R-7 group	-0.0322727769476488	0.711165358452732	0.912548797270739	-1
k__Fungi;p__Basidiomycota;c__Tremellomycetes;o__Filobasidiales;f__Filobasidiaceae	D_0__Bacteria;p__Firmicutes;D_2__Clostridia;D_3__Clostridiales;f__Christensenellaceae;g__Christensenellaceae R-7 group	0.0259106418731757	0.327442221665051	0.912548797270739	-1
k__Fungi;p__Ascomycota;c__Dothideomycetes;o__Capnodiales;f__Davidiellaceae;g__Davidiella	D_0__Bacteria;p__Firmicutes;D_2__Clostridia;D_3__Clostridiales;f__Christensenellaceae;g__Christensenellaceae R-7 group	-0.000221934575623951	0.501527136190594	0.912548797270739	1
k__Fungi;p__Ascomycota;c__Dothideomycetes;o__Pleosporales;f__Pleosporaceae;g__Alternaria	D_0__Bacteria;p__Firmicutes;D_2__Clostridia;D_3__Clostridiales;f__Christensenellaceae;g__Christensenellaceae R-7 group	-0.0249710087318101	0.66668297356821	0.912548797270739	-1
k__Fungi;p__Ascomycota;c__Eurotiomycetes;o__Eurotiales;f__Trichocomaceae;g__Penicillium	D_0__Bacteria;p__Firmicutes;D_2__Clostridia;D_3__Clostridiales;f__Christensenellaceae;g__Christensenellaceae R-7 group	-0.0502635514089258	0.807167119145757	0.912548797270739	1
k__Fungi;p__Ascomycota;c__Saccharomycetes;o__Saccharomycetales;f__Incertae sedis;g__Candida	D_0__Bacteria;p__Firmicutes;D_2__Clostridia;D_3__Clostridiales;f__Christensenellaceae;g__Christensenellaceae R-7 group	-0.0066681915311404	0.545783614855886	0.912548797270739	1
k__Fungi;p__Ascomycota;c__Sordariomycetes;o__Hypocreales;f__Nectriaceae;g__Fusarium	D_0__Bacteria;p__Firmicutes;D_2__Clostridia;D_3__Clostridiales;f__Christensenellaceae;g__Christensenellaceae R-7 group	-0.0322727769476488	0.711165358452732	0.912548797270739	-1
k__Fungi;p__Basidiomycota;c__Tremellomycetes;o__Filobasidiales;f__Filobasidiaceae;g__Filobasidium	D_0__Bacteria;p__Firmicutes;D_2__Clostridia;D_3__Clostridiales;f__Christensenellaceae;g__Christensenellaceae R-7 group	0.0259106418731757	0.327442221665051	0.912548797270739	-1
k__Fungi;p__Ascomycota;c__Dothideomycetes;o__Capnodiales;f__Davidiellaceae	D_0__Bacteria;p__Firmicutes;D_2__Clostridia;D_3__Clostridiales;f__Christensenellaceae;g__uncultured	-0.00947407998854699	0.564903956180025	0.912548797270739	1
k__Fungi;p__Ascomycota;c__Dothideomycetes;o__Pleosporales;f__Pleosporaceae	D_0__Bacteria;p__Firmicutes;D_2__Clostridia;D_3__Clostridiales;f__Christensenellaceae;g__uncultured	-0.00750804811002711	0.551519835979405	0.912548797270739	-1
k__Fungi;p__Ascomycota;c__Eurotiomycetes;o__Eurotiales;f__Trichocomaceae	D_0__Bacteria;p__Firmicutes;D_2__Clostridia;D_3__Clostridiales;f__Christensenellaceae;g__uncultured	-0.0283436876731665	0.687570607954268	0.912548797270739	1
k__Fungi;p__Ascomycota;c__Saccharomycetes;o__Saccharomycetales;f__Incertae sedis	D_0__Bacteria;p__Firmicutes;D_2__Clostridia;D_3__Clostridiales;f__Christensenellaceae;g__uncultured	-0.00106901175171745	0.507355494128203	0.912548797270739	-1
k__Fungi;p__Ascomycota;c__Sordariomycetes;o__Hypocreales;f__Cordycipitaceae	D_0__Bacteria;p__Firmicutes;D_2__Clostridia;D_3__Clostridiales;f__Christensenellaceae;g__uncultured	-0.036154676121703	0.73362285901121	0.912548797270739	-1
k__Fungi;p__Ascomycota;c__Sordariomycetes;o__Hypocreales;f__Nectriaceae	D_0__Bacteria;p__Firmicutes;D_2__Clostridia;D_3__Clostridiales;f__Christensenellaceae;g__uncultured	-0.0410683246072121	0.760730308432346	0.912548797270739	-1
k__Fungi;p__Basidiomycota;c__Tremellomycetes;o__Filobasidiales;f__Filobasidiaceae	D_0__Bacteria;p__Firmicutes;D_2__Clostridia;D_3__Clostridiales;f__Christensenellaceae;g__uncultured	0.00803274012311149	0.444901871437969	0.912548797270739	1
k__Fungi;p__Ascomycota;c__Dothideomycetes;o__Capnodiales;f__Davidiellaceae;g__Davidiella	D_0__Bacteria;p__Firmicutes;D_2__Clostridia;D_3__Clostridiales;f__Christensenellaceae;g__uncultured	-0.00947407998854699	0.564903956180025	0.912548797270739	1
k__Fungi;p__Ascomycota;c__Dothideomycetes;o__Pleosporales;f__Pleosporaceae;g__Alternaria	D_0__Bacteria;p__Firmicutes;D_2__Clostridia;D_3__Clostridiales;f__Christensenellaceae;g__uncultured	-0.00750804811002711	0.551519835979405	0.912548797270739	-1
k__Fungi;p__Ascomycota;c__Eurotiomycetes;o__Eurotiales;f__Trichocomaceae;g__Penicillium	D_0__Bacteria;p__Firmicutes;D_2__Clostridia;D_3__Clostridiales;f__Christensenellaceae;g__uncultured	-0.0283436876731665	0.687570607954268	0.912548797270739	1
k__Fungi;p__Ascomycota;c__Saccharomycetes;o__Saccharomycetales;f__Incertae sedis;g__Candida	D_0__Bacteria;p__Firmicutes;D_2__Clostridia;D_3__Clostridiales;f__Christensenellaceae;g__uncultured	-0.0223882385678746	0.650327664398727	0.912548797270739	1
k__Fungi;p__Ascomycota;c__Sordariomycetes;o__Hypocreales;f__Nectriaceae;g__Fusarium	D_0__Bacteria;p__Firmicutes;D_2__Clostridia;D_3__Clostridiales;f__Christensenellaceae;g__uncultured	-0.0410683246072121	0.760730308432346	0.912548797270739	-1
k__Fungi;p__Basidiomycota;c__Tremellomycetes;o__Filobasidiales;f__Filobasidiaceae;g__Filobasidium	D_0__Bacteria;p__Firmicutes;D_2__Clostridia;D_3__Clostridiales;f__Christensenellaceae;g__uncultured	0.00803274012311149	0.444901871437969	0.912548797270739	1
k__Fungi;p__Ascomycota;c__Dothideomycetes;o__Capnodiales;f__Davidiellaceae	D_0__Bacteria;p__Firmicutes;D_2__Clostridia;D_3__Clostridiales;f__Clostridiaceae 1;g__Clostridium sensu stricto 1	0.0205217963197283	0.361668938091627	0.912548797270739	-1
k__Fungi;p__Ascomycota;c__Eurotiomycetes;o__Eurotiales;f__Trichocomaceae	D_0__Bacteria;p__Firmicutes;D_2__Clostridia;D_3__Clostridiales;f__Clostridiaceae 1;g__Clostridium sensu stricto 1	-0.0303934910219316	0.699983893131387	0.912548797270739	-1
k__Fungi;p__Ascomycota;c__Saccharomycetes;o__Saccharomycetales;f__Incertae sedis	D_0__Bacteria;p__Firmicutes;D_2__Clostridia;D_3__Clostridiales;f__Clostridiaceae 1;g__Clostridium sensu stricto 1	0.0130596261548741	0.410886695827271	0.912548797270739	-1
k__Fungi;p__Ascomycota;c__Saccharomycetes;o__Saccharomycetales;f__Saccharomycetaceae	D_0__Bacteria;p__Firmicutes;D_2__Clostridia;D_3__Clostridiales;f__Clostridiaceae 1;g__Clostridium sensu stricto 1	-0.00847652692607974	0.558121192867799	0.912548797270739	1
k__Fungi;p__Ascomycota;c__Sordariomycetes;o__Hypocreales;f__Cordycipitaceae	D_0__Bacteria;p__Firmicutes;D_2__Clostridia;D_3__Clostridiales;f__Clostridiaceae 1;g__Clostridium sensu stricto 1	-0.0366130421891753	0.736215379485116	0.912548797270739	-1
k__Fungi;p__Ascomycota;c__Sordariomycetes;o__Hypocreales;f__Nectriaceae	D_0__Bacteria;p__Firmicutes;D_2__Clostridia;D_3__Clostridiales;f__Clostridiaceae 1;g__Clostridium sensu stricto 1	0.00384866651922738	0.473536524783635	0.912548797270739	-1
k__Fungi;p__Basidiomycota;c__Tremellomycetes;o__Filobasidiales;f__Filobasidiaceae	D_0__Bacteria;p__Firmicutes;D_2__Clostridia;D_3__Clostridiales;f__Clostridiaceae 1;g__Clostridium sensu stricto 1	-0.0550919533302153	0.829187524219015	0.912548797270739	-1
k__Fungi;p__Ascomycota;c__Dothideomycetes;o__Capnodiales;f__Davidiellaceae;g__Davidiella	D_0__Bacteria;p__Firmicutes;D_2__Clostridia;D_3__Clostridiales;f__Clostridiaceae 1;g__Clostridium sensu stricto 1	0.0205217963197283	0.361668938091627	0.912548797270739	-1
k__Fungi;p__Ascomycota;c__Eurotiomycetes;o__Eurotiales;f__Trichocomaceae;g__Penicillium	D_0__Bacteria;p__Firmicutes;D_2__Clostridia;D_3__Clostridiales;f__Clostridiaceae 1;g__Clostridium sensu stricto 1	-0.0303934910219316	0.699983893131387	0.912548797270739	-1
k__Fungi;p__Ascomycota;c__Saccharomycetes;o__Saccharomycetales;f__Saccharomycetaceae;g__Saccharomyces	D_0__Bacteria;p__Firmicutes;D_2__Clostridia;D_3__Clostridiales;f__Clostridiaceae 1;g__Clostridium sensu stricto 1	-0.0106403614614716	0.572809805067638	0.912548797270739	1
k__Fungi;p__Ascomycota;c__Sordariomycetes;o__Hypocreales;f__Nectriaceae;g__Fusarium	D_0__Bacteria;p__Firmicutes;D_2__Clostridia;D_3__Clostridiales;f__Clostridiaceae 1;g__Clostridium sensu stricto 1	0.00384866651922738	0.473536524783635	0.912548797270739	-1
k__Fungi;p__Basidiomycota;c__Tremellomycetes;o__Filobasidiales;f__Filobasidiaceae;g__Filobasidium	D_0__Bacteria;p__Firmicutes;D_2__Clostridia;D_3__Clostridiales;f__Clostridiaceae 1;g__Clostridium sensu stricto 1	-0.0550919533302153	0.829187524219015	0.912548797270739	-1
k__Fungi;p__Ascomycota;c__Dothideomycetes;o__Pleosporales;f__Pleosporaceae	D_0__Bacteria;p__Firmicutes;D_2__Clostridia;D_3__Clostridiales;f__Clostridiales vadinBB60 group;g__uncultured bacterium	0.0163255194873371	0.389123354987048	0.912548797270739	-1
k__Fungi;p__Ascomycota;c__Eurotiomycetes;o__Eurotiales;f__Trichocomaceae	D_0__Bacteria;p__Firmicutes;D_2__Clostridia;D_3__Clostridiales;f__Clostridiales vadinBB60 group;g__uncultured bacterium	0.0260275023446807	0.326714509180791	0.912548797270739	1
k__Fungi;p__Ascomycota;c__Saccharomycetes;o__Saccharomycetales;f__Incertae sedis	D_0__Bacteria;p__Firmicutes;D_2__Clostridia;D_3__Clostridiales;f__Clostridiales vadinBB60 group;g__uncultured bacterium	-0.0557366001707112	0.832001355827131	0.912548797270739	-1
k__Fungi;p__Ascomycota;c__Saccharomycetes;o__Saccharomycetales;f__Saccharomycetaceae	D_0__Bacteria;p__Firmicutes;D_2__Clostridia;D_3__Clostridiales;f__Clostridiales vadinBB60 group;g__uncultured bacterium	-0.0151849178246201	0.603311374073349	0.912548797270739	1
k__Fungi;p__Ascomycota;c__Sordariomycetes;o__Hypocreales;f__Nectriaceae	D_0__Bacteria;p__Firmicutes;D_2__Clostridia;D_3__Clostridiales;f__Clostridiales vadinBB60 group;g__uncultured bacterium	-0.0380706426977545	0.744373617714832	0.912548797270739	-1
k__Fungi;p__Ascomycota;c__Dothideomycetes;o__Pleosporales;f__Pleosporaceae;g__Alternaria	D_0__Bacteria;p__Firmicutes;D_2__Clostridia;D_3__Clostridiales;f__Clostridiales vadinBB60 group;g__uncultured bacterium	0.0163255194873371	0.389123354987048	0.912548797270739	-1
k__Fungi;p__Ascomycota;c__Eurotiomycetes;o__Eurotiales;f__Trichocomaceae;g__Penicillium	D_0__Bacteria;p__Firmicutes;D_2__Clostridia;D_3__Clostridiales;f__Clostridiales vadinBB60 group;g__uncultured bacterium	0.0260275023446807	0.326714509180791	0.912548797270739	1
k__Fungi;p__Ascomycota;c__Saccharomycetes;o__Saccharomycetales;f__Incertae sedis;g__Candida	D_0__Bacteria;p__Firmicutes;D_2__Clostridia;D_3__Clostridiales;f__Clostridiales vadinBB60 group;g__uncultured bacterium	0.00863795086329331	0.440780016827208	0.912548797270739	-1
k__Fungi;p__Ascomycota;c__Saccharomycetes;o__Saccharomycetales;f__Incertae sedis;g__Debaryomyces	D_0__Bacteria;p__Firmicutes;D_2__Clostridia;D_3__Clostridiales;f__Clostridiales vadinBB60 group;g__uncultured bacterium	-0.0539953660243022	0.824332507648839	0.912548797270739	1
k__Fungi;p__Ascomycota;c__Saccharomycetes;o__Saccharomycetales;f__Saccharomycetaceae;g__Saccharomyces	D_0__Bacteria;p__Firmicutes;D_2__Clostridia;D_3__Clostridiales;f__Clostridiales vadinBB60 group;g__uncultured bacterium	-0.0204488118802998	0.637859101738978	0.912548797270739	1
k__Fungi;p__Ascomycota;c__Sordariomycetes;o__Hypocreales;f__Nectriaceae;g__Fusarium	D_0__Bacteria;p__Firmicutes;D_2__Clostridia;D_3__Clostridiales;f__Clostridiales vadinBB60 group;g__uncultured bacterium	-0.0380706426977545	0.744373617714832	0.912548797270739	-1
k__Fungi;p__Ascomycota;c__Dothideomycetes;o__Capnodiales;f__Davidiellaceae	D_0__Bacteria;p__Firmicutes;D_2__Clostridia;D_3__Clostridiales;f__Defluviitaleaceae;g__Defluviitaleaceae UCG-011	0.0407026439342549	0.241234051490883	0.912548797270739	-1
k__Fungi;p__Ascomycota;c__Saccharomycetes;o__Saccharomycetales;f__Saccharomycetaceae	D_0__Bacteria;p__Firmicutes;D_2__Clostridia;D_3__Clostridiales;f__Defluviitaleaceae;g__Defluviitaleaceae UCG-011	-0.0163876824676466	0.611287782596669	0.912548797270739	1
k__Fungi;p__Ascomycota;c__Sordariomycetes;o__Hypocreales;f__Cordycipitaceae	D_0__Bacteria;p__Firmicutes;D_2__Clostridia;D_3__Clostridiales;f__Defluviitaleaceae;g__Defluviitaleaceae UCG-011	-0.0480625159697713	0.796581140200932	0.912548797270739	1
k__Fungi;p__Ascomycota;c__Sordariomycetes;o__Hypocreales;f__Nectriaceae	D_0__Bacteria;p__Firmicutes;D_2__Clostridia;D_3__Clostridiales;f__Defluviitaleaceae;g__Defluviitaleaceae UCG-011	-0.040550589956629	0.757946586793818	0.912548797270739	-1
k__Fungi;p__Ascomycota;c__Dothideomycetes;o__Capnodiales;f__Davidiellaceae;g__Davidiella	D_0__Bacteria;p__Firmicutes;D_2__Clostridia;D_3__Clostridiales;f__Defluviitaleaceae;g__Defluviitaleaceae UCG-011	0.0407026439342549	0.241234051490883	0.912548797270739	-1
k__Fungi;p__Ascomycota;c__Saccharomycetes;o__Saccharomycetales;f__Incertae sedis;g__Debaryomyces	D_0__Bacteria;p__Firmicutes;D_2__Clostridia;D_3__Clostridiales;f__Defluviitaleaceae;g__Defluviitaleaceae UCG-011	-0.0174395584880442	0.618225602153721	0.912548797270739	1
k__Fungi;p__Ascomycota;c__Saccharomycetes;o__Saccharomycetales;f__Saccharomycetaceae;g__Saccharomyces	D_0__Bacteria;p__Firmicutes;D_2__Clostridia;D_3__Clostridiales;f__Defluviitaleaceae;g__Defluviitaleaceae UCG-011	-0.0251052140040994	0.667524593294355	0.912548797270739	1
k__Fungi;p__Ascomycota;c__Sordariomycetes;o__Hypocreales;f__Nectriaceae;g__Fusarium	D_0__Bacteria;p__Firmicutes;D_2__Clostridia;D_3__Clostridiales;f__Defluviitaleaceae;g__Defluviitaleaceae UCG-011	-0.040550589956629	0.757946586793818	0.912548797270739	-1
k__Fungi;p__Ascomycota;c__Dothideomycetes;o__Capnodiales;f__Davidiellaceae	D_0__Bacteria;p__Firmicutes;D_2__Clostridia;D_3__Clostridiales;f__Eubacteriaceae;g__Anaerofustis	-0.0342892952839819	0.722941648258585	0.912548797270739	1
k__Fungi;p__Ascomycota;c__Dothideomycetes;o__Pleosporales;f__Pleosporaceae	D_0__Bacteria;p__Firmicutes;D_2__Clostridia;D_3__Clostridiales;f__Eubacteriaceae;g__Anaerofustis	-0.0497873308197829	0.804905561953476	0.912548797270739	-1
k__Fungi;p__Ascomycota;c__Eurotiomycetes;o__Eurotiales;f__Trichocomaceae	D_0__Bacteria;p__Firmicutes;D_2__Clostridia;D_3__Clostridiales;f__Eubacteriaceae;g__Anaerofustis	-0.064901847275234	0.868775589649008	0.912548797270739	-1
k__Fungi;p__Ascomycota;c__Saccharomycetes;o__Saccharomycetales;f__Incertae sedis	D_0__Bacteria;p__Firmicutes;D_2__Clostridia;D_3__Clostridiales;f__Eubacteriaceae;g__Anaerofustis	-0.000672793134197511	0.504629410692161	0.912548797270739	1
k__Fungi;p__Ascomycota;c__Saccharomycetes;o__Saccharomycetales;f__Saccharomycetaceae	D_0__Bacteria;p__Firmicutes;D_2__Clostridia;D_3__Clostridiales;f__Eubacteriaceae;g__Anaerofustis	-0.0442717959242407	0.777561456824805	0.912548797270739	1
k__Fungi;p__Ascomycota;c__Sordariomycetes;o__Hypocreales;f__Cordycipitaceae	D_0__Bacteria;p__Firmicutes;D_2__Clostridia;D_3__Clostridiales;f__Eubacteriaceae;g__Anaerofustis	0.000568410313883391	0.496088810260284	0.912548797270739	-1
k__Fungi;p__Ascomycota;c__Sordariomycetes;o__Hypocreales;f__Nectriaceae	D_0__Bacteria;p__Firmicutes;D_2__Clostridia;D_3__Clostridiales;f__Eubacteriaceae;g__Anaerofustis	0.00648853315549115	0.455444727928792	0.912548797270739	-1
k__Fungi;p__Basidiomycota;c__Tremellomycetes;o__Filobasidiales;f__Filobasidiaceae	D_0__Bacteria;p__Firmicutes;D_2__Clostridia;D_3__Clostridiales;f__Eubacteriaceae;g__Anaerofustis	-0.0151810283489265	0.603285508254481	0.912548797270739	1
k__Fungi;p__Ascomycota;c__Dothideomycetes;o__Capnodiales;f__Davidiellaceae;g__Davidiella	D_0__Bacteria;p__Firmicutes;D_2__Clostridia;D_3__Clostridiales;f__Eubacteriaceae;g__Anaerofustis	-0.0342892952839819	0.722941648258585	0.912548797270739	1
k__Fungi;p__Ascomycota;c__Dothideomycetes;o__Pleosporales;f__Pleosporaceae;g__Alternaria	D_0__Bacteria;p__Firmicutes;D_2__Clostridia;D_3__Clostridiales;f__Eubacteriaceae;g__Anaerofustis	-0.0497873308197829	0.804905561953476	0.912548797270739	-1
k__Fungi;p__Ascomycota;c__Eurotiomycetes;o__Eurotiales;f__Trichocomaceae;g__Penicillium	D_0__Bacteria;p__Firmicutes;D_2__Clostridia;D_3__Clostridiales;f__Eubacteriaceae;g__Anaerofustis	-0.064901847275234	0.868775589649008	0.912548797270739	-1
k__Fungi;p__Ascomycota;c__Saccharomycetes;o__Saccharomycetales;f__Incertae sedis;g__Debaryomyces	D_0__Bacteria;p__Firmicutes;D_2__Clostridia;D_3__Clostridiales;f__Eubacteriaceae;g__Anaerofustis	-0.0168922590805543	0.614620358726231	0.912548797270739	-1
k__Fungi;p__Ascomycota;c__Saccharomycetes;o__Saccharomycetales;f__Saccharomycetaceae;g__Saccharomyces	D_0__Bacteria;p__Firmicutes;D_2__Clostridia;D_3__Clostridiales;f__Eubacteriaceae;g__Anaerofustis	-0.042042383641909	0.765920059915434	0.912548797270739	1
k__Fungi;p__Ascomycota;c__Sordariomycetes;o__Hypocreales;f__Nectriaceae;g__Fusarium	D_0__Bacteria;p__Firmicutes;D_2__Clostridia;D_3__Clostridiales;f__Eubacteriaceae;g__Anaerofustis	0.00648853315549115	0.455444727928792	0.912548797270739	-1
k__Fungi;p__Basidiomycota;c__Tremellomycetes;o__Filobasidiales;f__Filobasidiaceae;g__Filobasidium	D_0__Bacteria;p__Firmicutes;D_2__Clostridia;D_3__Clostridiales;f__Eubacteriaceae;g__Anaerofustis	-0.0151810283489265	0.603285508254481	0.912548797270739	1
k__Fungi;p__Ascomycota;c__Dothideomycetes;o__Capnodiales;f__Davidiellaceae	D_0__Bacteria;p__Firmicutes;D_2__Clostridia;D_3__Clostridiales;f__Family XI;g__Ezakiella	-0.0222376126806244	0.649364845217137	0.912548797270739	0
k__Fungi;p__Ascomycota;c__Dothideomycetes;o__Pleosporales;f__Pleosporaceae	D_0__Bacteria;p__Firmicutes;D_2__Clostridia;D_3__Clostridiales;f__Family XI;g__Ezakiella	-0.0319965835549038	0.709534338870009	0.912548797270739	-1
k__Fungi;p__Ascomycota;c__Eurotiomycetes;o__Eurotiales;f__Trichocomaceae	D_0__Bacteria;p__Firmicutes;D_2__Clostridia;D_3__Clostridiales;f__Family XI;g__Ezakiella	-0.0618903655268095	0.857357463585217	0.912548797270739	-1
k__Fungi;p__Ascomycota;c__Saccharomycetes;o__Saccharomycetales;f__Incertae sedis	D_0__Bacteria;p__Firmicutes;D_2__Clostridia;D_3__Clostridiales;f__Family XI;g__Ezakiella	-0.0244220507440882	0.663231720480231	0.912548797270739	-1
k__Fungi;p__Ascomycota;c__Saccharomycetes;o__Saccharomycetales;f__Saccharomycetaceae	D_0__Bacteria;p__Firmicutes;D_2__Clostridia;D_3__Clostridiales;f__Family XI;g__Ezakiella	0.00197782893305266	0.486393112991103	0.912548797270739	-1
k__Fungi;p__Ascomycota;c__Sordariomycetes;o__Hypocreales;f__Cordycipitaceae	D_0__Bacteria;p__Firmicutes;D_2__Clostridia;D_3__Clostridiales;f__Family XI;g__Ezakiella	-0.0563977038042484	0.834856007010832	0.912548797270739	-1
k__Fungi;p__Ascomycota;c__Sordariomycetes;o__Hypocreales;f__Nectriaceae	D_0__Bacteria;p__Firmicutes;D_2__Clostridia;D_3__Clostridiales;f__Family XI;g__Ezakiella	0.00491100297375546	0.466247374168749	0.912548797270739	-1
k__Fungi;p__Basidiomycota;c__Tremellomycetes;o__Filobasidiales;f__Filobasidiaceae	D_0__Bacteria;p__Firmicutes;D_2__Clostridia;D_3__Clostridiales;f__Family XI;g__Ezakiella	0.0124173518229456	0.41520130568758	0.912548797270739	1
k__Fungi;p__Ascomycota;c__Dothideomycetes;o__Capnodiales;f__Davidiellaceae;g__Davidiella	D_0__Bacteria;p__Firmicutes;D_2__Clostridia;D_3__Clostridiales;f__Family XI;g__Ezakiella	-0.0222376126806244	0.649364845217137	0.912548797270739	0
k__Fungi;p__Ascomycota;c__Dothideomycetes;o__Pleosporales;f__Pleosporaceae;g__Alternaria	D_0__Bacteria;p__Firmicutes;D_2__Clostridia;D_3__Clostridiales;f__Family XI;g__Ezakiella	-0.0319965835549038	0.709534338870009	0.912548797270739	-1
k__Fungi;p__Ascomycota;c__Eurotiomycetes;o__Eurotiales;f__Trichocomaceae;g__Penicillium	D_0__Bacteria;p__Firmicutes;D_2__Clostridia;D_3__Clostridiales;f__Family XI;g__Ezakiella	-0.0618903655268095	0.857357463585217	0.912548797270739	-1
k__Fungi;p__Ascomycota;c__Saccharomycetes;o__Saccharomycetales;f__Incertae sedis;g__Candida	D_0__Bacteria;p__Firmicutes;D_2__Clostridia;D_3__Clostridiales;f__Family XI;g__Ezakiella	-0.050739911006987	0.809413322276048	0.912548797270739	1
k__Fungi;p__Ascomycota;c__Saccharomycetes;o__Saccharomycetales;f__Saccharomycetaceae;g__Saccharomyces	D_0__Bacteria;p__Firmicutes;D_2__Clostridia;D_3__Clostridiales;f__Family XI;g__Ezakiella	-0.00463961907815422	0.531891516841694	0.912548797270739	1
k__Fungi;p__Ascomycota;c__Sordariomycetes;o__Hypocreales;f__Nectriaceae;g__Fusarium	D_0__Bacteria;p__Firmicutes;D_2__Clostridia;D_3__Clostridiales;f__Family XI;g__Ezakiella	0.00491100297375546	0.466247374168749	0.912548797270739	-1
k__Fungi;p__Basidiomycota;c__Tremellomycetes;o__Filobasidiales;f__Filobasidiaceae;g__Filobasidium	D_0__Bacteria;p__Firmicutes;D_2__Clostridia;D_3__Clostridiales;f__Family XI;g__Ezakiella	0.0124173518229456	0.41520130568758	0.912548797270739	1
k__Fungi;p__Ascomycota;c__Dothideomycetes;o__Capnodiales;f__Davidiellaceae	D_0__Bacteria;p__Firmicutes;D_2__Clostridia;D_3__Clostridiales;f__Family XI;g__Finegoldia	-0.0393834892135654	0.751607820727545	0.912548797270739	1
k__Fungi;p__Ascomycota;c__Dothideomycetes;o__Pleosporales;f__Pleosporaceae	D_0__Bacteria;p__Firmicutes;D_2__Clostridia;D_3__Clostridiales;f__Family XI;g__Finegoldia	-0.0508626472840592	0.809989467373216	0.912548797270739	1
k__Fungi;p__Ascomycota;c__Eurotiomycetes;o__Eurotiales;f__Trichocomaceae	D_0__Bacteria;p__Firmicutes;D_2__Clostridia;D_3__Clostridiales;f__Family XI;g__Finegoldia	-0.0216592677162039	0.645659163784117	0.912548797270739	-1
k__Fungi;p__Ascomycota;c__Saccharomycetes;o__Saccharomycetales;f__Incertae sedis	D_0__Bacteria;p__Firmicutes;D_2__Clostridia;D_3__Clostridiales;f__Family XI;g__Finegoldia	-0.00637396978595743	0.543771768447181	0.912548797270739	1
k__Fungi;p__Ascomycota;c__Saccharomycetes;o__Saccharomycetales;f__Saccharomycetaceae	D_0__Bacteria;p__Firmicutes;D_2__Clostridia;D_3__Clostridiales;f__Family XI;g__Finegoldia	-0.0114091342005087	0.578005407657507	0.912548797270739	1
k__Fungi;p__Ascomycota;c__Sordariomycetes;o__Hypocreales;f__Cordycipitaceae	D_0__Bacteria;p__Firmicutes;D_2__Clostridia;D_3__Clostridiales;f__Family XI;g__Finegoldia	-0.0340958325452593	0.72182205444378	0.912548797270739	1
k__Fungi;p__Ascomycota;c__Sordariomycetes;o__Hypocreales;f__Nectriaceae	D_0__Bacteria;p__Firmicutes;D_2__Clostridia;D_3__Clostridiales;f__Family XI;g__Finegoldia	-0.0137004803451226	0.593407708996712	0.912548797270739	1
k__Fungi;p__Basidiomycota;c__Tremellomycetes;o__Filobasidiales;f__Filobasidiaceae	D_0__Bacteria;p__Firmicutes;D_2__Clostridia;D_3__Clostridiales;f__Family XI;g__Finegoldia	-0.0306035687389794	0.701243454275206	0.912548797270739	1
k__Fungi;p__Ascomycota;c__Dothideomycetes;o__Capnodiales;f__Davidiellaceae;g__Davidiella	D_0__Bacteria;p__Firmicutes;D_2__Clostridia;D_3__Clostridiales;f__Family XI;g__Finegoldia	-0.0393834892135654	0.751607820727545	0.912548797270739	1
k__Fungi;p__Ascomycota;c__Dothideomycetes;o__Pleosporales;f__Pleosporaceae;g__Alternaria	D_0__Bacteria;p__Firmicutes;D_2__Clostridia;D_3__Clostridiales;f__Family XI;g__Finegoldia	-0.0508626472840592	0.809989467373216	0.912548797270739	1
k__Fungi;p__Ascomycota;c__Eurotiomycetes;o__Eurotiales;f__Trichocomaceae;g__Penicillium	D_0__Bacteria;p__Firmicutes;D_2__Clostridia;D_3__Clostridiales;f__Family XI;g__Finegoldia	-0.0216592677162039	0.645659163784117	0.912548797270739	-1
k__Fungi;p__Ascomycota;c__Saccharomycetes;o__Saccharomycetales;f__Incertae sedis;g__Candida	D_0__Bacteria;p__Firmicutes;D_2__Clostridia;D_3__Clostridiales;f__Family XI;g__Finegoldia	-0.0515753454807853	0.813313901219425	0.912548797270739	1
k__Fungi;p__Ascomycota;c__Saccharomycetes;o__Saccharomycetales;f__Incertae sedis;g__Debaryomyces	D_0__Bacteria;p__Firmicutes;D_2__Clostridia;D_3__Clostridiales;f__Family XI;g__Finegoldia	-0.0249823074822919	0.66675386185879	0.912548797270739	1
k__Fungi;p__Ascomycota;c__Saccharomycetes;o__Saccharomycetales;f__Saccharomycetaceae;g__Saccharomyces	D_0__Bacteria;p__Firmicutes;D_2__Clostridia;D_3__Clostridiales;f__Family XI;g__Finegoldia	-0.0132636857130674	0.590481900015017	0.912548797270739	1
k__Fungi;p__Ascomycota;c__Sordariomycetes;o__Hypocreales;f__Nectriaceae;g__Fusarium	D_0__Bacteria;p__Firmicutes;D_2__Clostridia;D_3__Clostridiales;f__Family XI;g__Finegoldia	-0.0137004803451226	0.593407708996712	0.912548797270739	1
k__Fungi;p__Basidiomycota;c__Tremellomycetes;o__Filobasidiales;f__Filobasidiaceae;g__Filobasidium	D_0__Bacteria;p__Firmicutes;D_2__Clostridia;D_3__Clostridiales;f__Family XI;g__Finegoldia	-0.0306035687389794	0.701243454275206	0.912548797270739	1
k__Fungi;p__Ascomycota;c__Dothideomycetes;o__Capnodiales;f__Davidiellaceae	D_0__Bacteria;p__Firmicutes;D_2__Clostridia;D_3__Clostridiales;f__Family XI;g__Parvimonas	0.00561552067285686	0.461419426583155	0.912548797270739	-1
k__Fungi;p__Ascomycota;c__Dothideomycetes;o__Pleosporales;f__Pleosporaceae	D_0__Bacteria;p__Firmicutes;D_2__Clostridia;D_3__Clostridiales;f__Family XI;g__Parvimonas	-0.00854015744584785	0.558554370584649	0.912548797270739	-1
k__Fungi;p__Ascomycota;c__Saccharomycetes;o__Saccharomycetales;f__Incertae sedis	D_0__Bacteria;p__Firmicutes;D_2__Clostridia;D_3__Clostridiales;f__Family XI;g__Parvimonas	-0.0483481100642827	0.797973875574787	0.912548797270739	-1
k__Fungi;p__Ascomycota;c__Saccharomycetes;o__Saccharomycetales;f__Saccharomycetaceae	D_0__Bacteria;p__Firmicutes;D_2__Clostridia;D_3__Clostridiales;f__Family XI;g__Parvimonas	-0.0414548166809944	0.76279697542581	0.912548797270739	1
k__Fungi;p__Ascomycota;c__Sordariomycetes;o__Hypocreales;f__Cordycipitaceae	D_0__Bacteria;p__Firmicutes;D_2__Clostridia;D_3__Clostridiales;f__Family XI;g__Parvimonas	-0.00387260047540568	0.526627802752637	0.912548797270739	-1
k__Fungi;p__Ascomycota;c__Sordariomycetes;o__Hypocreales;f__Nectriaceae	D_0__Bacteria;p__Firmicutes;D_2__Clostridia;D_3__Clostridiales;f__Family XI;g__Parvimonas	-0.0213116129482706	0.643424956435828	0.912548797270739	1
k__Fungi;p__Basidiomycota;c__Tremellomycetes;o__Filobasidiales;f__Filobasidiaceae	D_0__Bacteria;p__Firmicutes;D_2__Clostridia;D_3__Clostridiales;f__Family XI;g__Parvimonas	-0.0285022126147866	0.688538449888203	0.912548797270739	1
k__Fungi;p__Ascomycota;c__Dothideomycetes;o__Capnodiales;f__Davidiellaceae;g__Davidiella	D_0__Bacteria;p__Firmicutes;D_2__Clostridia;D_3__Clostridiales;f__Family XI;g__Parvimonas	0.00561552067285686	0.461419426583155	0.912548797270739	-1
k__Fungi;p__Ascomycota;c__Dothideomycetes;o__Pleosporales;f__Pleosporaceae;g__Alternaria	D_0__Bacteria;p__Firmicutes;D_2__Clostridia;D_3__Clostridiales;f__Family XI;g__Parvimonas	-0.00854015744584785	0.558554370584649	0.912548797270739	-1
k__Fungi;p__Ascomycota;c__Saccharomycetes;o__Saccharomycetales;f__Incertae sedis;g__Candida	D_0__Bacteria;p__Firmicutes;D_2__Clostridia;D_3__Clostridiales;f__Family XI;g__Parvimonas	-0.0376004711366863	0.741756452008167	0.912548797270739	-1
k__Fungi;p__Ascomycota;c__Saccharomycetes;o__Saccharomycetales;f__Incertae sedis;g__Debaryomyces	D_0__Bacteria;p__Firmicutes;D_2__Clostridia;D_3__Clostridiales;f__Family XI;g__Parvimonas	-0.0443164869925066	0.777791412371466	0.912548797270739	1
k__Fungi;p__Ascomycota;c__Saccharomycetes;o__Saccharomycetales;f__Saccharomycetaceae;g__Saccharomyces	D_0__Bacteria;p__Firmicutes;D_2__Clostridia;D_3__Clostridiales;f__Family XI;g__Parvimonas	-0.039858372305133	0.754197581539712	0.912548797270739	1
k__Fungi;p__Ascomycota;c__Sordariomycetes;o__Hypocreales;f__Nectriaceae;g__Fusarium	D_0__Bacteria;p__Firmicutes;D_2__Clostridia;D_3__Clostridiales;f__Family XI;g__Parvimonas	-0.0213116129482706	0.643424956435828	0.912548797270739	1
k__Fungi;p__Basidiomycota;c__Tremellomycetes;o__Filobasidiales;f__Filobasidiaceae;g__Filobasidium	D_0__Bacteria;p__Firmicutes;D_2__Clostridia;D_3__Clostridiales;f__Family XI;g__Parvimonas	-0.0285022126147866	0.688538449888203	0.912548797270739	1
k__Fungi;p__Ascomycota;c__Dothideomycetes;o__Capnodiales;f__Davidiellaceae	D_0__Bacteria;p__Firmicutes;D_2__Clostridia;D_3__Clostridiales;f__Family XIII;g__Family XIII AD3011 group	-0.0477850737050964	0.795222715818351	0.912548797270739	1
k__Fungi;p__Ascomycota;c__Dothideomycetes;o__Pleosporales;f__Pleosporaceae	D_0__Bacteria;p__Firmicutes;D_2__Clostridia;D_3__Clostridiales;f__Family XIII;g__Family XIII AD3011 group	-0.051364828480484	0.812335677711234	0.912548797270739	-1
k__Fungi;p__Ascomycota;c__Eurotiomycetes;o__Eurotiales;f__Trichocomaceae	D_0__Bacteria;p__Firmicutes;D_2__Clostridia;D_3__Clostridiales;f__Family XIII;g__Family XIII AD3011 group	-0.0569505379964071	0.837219019713805	0.912548797270739	1
k__Fungi;p__Ascomycota;c__Saccharomycetes;o__Saccharomycetales;f__Incertae sedis	D_0__Bacteria;p__Firmicutes;D_2__Clostridia;D_3__Clostridiales;f__Family XIII;g__Family XIII AD3011 group	-0.0502349578770603	0.80703178064331	0.912548797270739	1
k__Fungi;p__Ascomycota;c__Saccharomycetes;o__Saccharomycetales;f__Saccharomycetaceae	D_0__Bacteria;p__Firmicutes;D_2__Clostridia;D_3__Clostridiales;f__Family XIII;g__Family XIII AD3011 group	0.018146130227469	0.377135062482623	0.912548797270739	1
k__Fungi;p__Basidiomycota;c__Tremellomycetes;o__Filobasidiales;f__Filobasidiaceae	D_0__Bacteria;p__Firmicutes;D_2__Clostridia;D_3__Clostridiales;f__Family XIII;g__Family XIII AD3011 group	0.0347638344825203	0.274321460209487	0.912548797270739	1
k__Fungi;p__Ascomycota;c__Dothideomycetes;o__Capnodiales;f__Davidiellaceae;g__Davidiella	D_0__Bacteria;p__Firmicutes;D_2__Clostridia;D_3__Clostridiales;f__Family XIII;g__Family XIII AD3011 group	-0.0477850737050964	0.795222715818351	0.912548797270739	1
k__Fungi;p__Ascomycota;c__Dothideomycetes;o__Pleosporales;f__Pleosporaceae;g__Alternaria	D_0__Bacteria;p__Firmicutes;D_2__Clostridia;D_3__Clostridiales;f__Family XIII;g__Family XIII AD3011 group	-0.051364828480484	0.812335677711234	0.912548797270739	-1
k__Fungi;p__Ascomycota;c__Eurotiomycetes;o__Eurotiales;f__Trichocomaceae;g__Penicillium	D_0__Bacteria;p__Firmicutes;D_2__Clostridia;D_3__Clostridiales;f__Family XIII;g__Family XIII AD3011 group	-0.0569505379964071	0.837219019713805	0.912548797270739	1
k__Fungi;p__Ascomycota;c__Saccharomycetes;o__Saccharomycetales;f__Incertae sedis;g__Candida	D_0__Bacteria;p__Firmicutes;D_2__Clostridia;D_3__Clostridiales;f__Family XIII;g__Family XIII AD3011 group	-0.0542758218616882	0.82558239730867	0.912548797270739	1
k__Fungi;p__Ascomycota;c__Saccharomycetes;o__Saccharomycetales;f__Incertae sedis;g__Debaryomyces	D_0__Bacteria;p__Firmicutes;D_2__Clostridia;D_3__Clostridiales;f__Family XIII;g__Family XIII AD3011 group	-0.0381787662801147	0.744973522284521	0.912548797270739	1
k__Fungi;p__Ascomycota;c__Saccharomycetes;o__Saccharomycetales;f__Saccharomycetaceae;g__Saccharomyces	D_0__Bacteria;p__Firmicutes;D_2__Clostridia;D_3__Clostridiales;f__Family XIII;g__Family XIII AD3011 group	0.00894800339163177	0.43867081140256	0.912548797270739	1
k__Fungi;p__Basidiomycota;c__Tremellomycetes;o__Filobasidiales;f__Filobasidiaceae;g__Filobasidium	D_0__Bacteria;p__Firmicutes;D_2__Clostridia;D_3__Clostridiales;f__Family XIII;g__Family XIII AD3011 group	0.0347638344825203	0.274321460209487	0.912548797270739	1
k__Fungi;p__Ascomycota;c__Dothideomycetes;o__Capnodiales;f__Davidiellaceae	D_0__Bacteria;p__Firmicutes;D_2__Clostridia;D_3__Clostridiales;f__Family XIII;g__Family XIII UCG-001	-0.047712616489782	0.794867065733322	0.912548797270739	-1
k__Fungi;p__Ascomycota;c__Dothideomycetes;o__Pleosporales;f__Pleosporaceae	D_0__Bacteria;p__Firmicutes;D_2__Clostridia;D_3__Clostridiales;f__Family XIII;g__Family XIII UCG-001	0.0229955738320973	0.345799980251504	0.912548797270739	-1
k__Fungi;p__Ascomycota;c__Saccharomycetes;o__Saccharomycetales;f__Incertae sedis	D_0__Bacteria;p__Firmicutes;D_2__Clostridia;D_3__Clostridiales;f__Family XIII;g__Family XIII UCG-001	-0.0444550762397295	0.778503657154802	0.912548797270739	1
k__Fungi;p__Ascomycota;c__Saccharomycetes;o__Saccharomycetales;f__Saccharomycetaceae	D_0__Bacteria;p__Firmicutes;D_2__Clostridia;D_3__Clostridiales;f__Family XIII;g__Family XIII UCG-001	-0.0315467791823115	0.706868943306188	0.912548797270739	1
k__Fungi;p__Ascomycota;c__Sordariomycetes;o__Hypocreales;f__Nectriaceae	D_0__Bacteria;p__Firmicutes;D_2__Clostridia;D_3__Clostridiales;f__Family XIII;g__Family XIII UCG-001	-0.0154523846242107	0.605088992872	0.912548797270739	-1
k__Fungi;p__Basidiomycota;c__Tremellomycetes;o__Filobasidiales;f__Filobasidiaceae	D_0__Bacteria;p__Firmicutes;D_2__Clostridia;D_3__Clostridiales;f__Family XIII;g__Family XIII UCG-001	0.0265920529551003	0.323208216775555	0.912548797270739	1
k__Fungi;p__Ascomycota;c__Dothideomycetes;o__Capnodiales;f__Davidiellaceae;g__Davidiella	D_0__Bacteria;p__Firmicutes;D_2__Clostridia;D_3__Clostridiales;f__Family XIII;g__Family XIII UCG-001	-0.047712616489782	0.794867065733322	0.912548797270739	-1
k__Fungi;p__Ascomycota;c__Dothideomycetes;o__Pleosporales;f__Pleosporaceae;g__Alternaria	D_0__Bacteria;p__Firmicutes;D_2__Clostridia;D_3__Clostridiales;f__Family XIII;g__Family XIII UCG-001	0.0229955738320973	0.345799980251504	0.912548797270739	-1
k__Fungi;p__Ascomycota;c__Saccharomycetes;o__Saccharomycetales;f__Saccharomycetaceae;g__Saccharomyces	D_0__Bacteria;p__Firmicutes;D_2__Clostridia;D_3__Clostridiales;f__Family XIII;g__Family XIII UCG-001	-0.0340092934776232	0.721320532078265	0.912548797270739	1
k__Fungi;p__Ascomycota;c__Sordariomycetes;o__Hypocreales;f__Nectriaceae;g__Fusarium	D_0__Bacteria;p__Firmicutes;D_2__Clostridia;D_3__Clostridiales;f__Family XIII;g__Family XIII UCG-001	-0.0154523846242107	0.605088992872	0.912548797270739	-1
k__Fungi;p__Basidiomycota;c__Tremellomycetes;o__Filobasidiales;f__Filobasidiaceae;g__Filobasidium	D_0__Bacteria;p__Firmicutes;D_2__Clostridia;D_3__Clostridiales;f__Family XIII;g__Family XIII UCG-001	0.0265920529551003	0.323208216775555	0.912548797270739	1
k__Fungi;p__Ascomycota;c__Dothideomycetes;o__Capnodiales;f__Davidiellaceae	D_0__Bacteria;p__Firmicutes;D_2__Clostridia;D_3__Clostridiales;f__Family XIII;g__[Eubacterium] brachy group	-0.00373808507730181	0.525704179188542	0.912548797270739	1
k__Fungi;p__Ascomycota;c__Dothideomycetes;o__Pleosporales;f__Pleosporaceae	D_0__Bacteria;p__Firmicutes;D_2__Clostridia;D_3__Clostridiales;f__Family XIII;g__[Eubacterium] brachy group	-0.0583112328332277	0.842941435041275	0.912548797270739	1
k__Fungi;p__Ascomycota;c__Eurotiomycetes;o__Eurotiales;f__Trichocomaceae	D_0__Bacteria;p__Firmicutes;D_2__Clostridia;D_3__Clostridiales;f__Family XIII;g__[Eubacterium] brachy group	-0.0089423925041275	0.561291034419438	0.912548797270739	1
k__Fungi;p__Ascomycota;c__Saccharomycetes;o__Saccharomycetales;f__Incertae sedis	D_0__Bacteria;p__Firmicutes;D_2__Clostridia;D_3__Clostridiales;f__Family XIII;g__[Eubacterium] brachy group	-0.0324160086235752	0.712009499714842	0.912548797270739	-1
k__Fungi;p__Ascomycota;c__Sordariomycetes;o__Hypocreales;f__Cordycipitaceae	D_0__Bacteria;p__Firmicutes;D_2__Clostridia;D_3__Clostridiales;f__Family XIII;g__[Eubacterium] brachy group	0.0378143344201767	0.257051387327253	0.912548797270739	-1
k__Fungi;p__Basidiomycota;c__Tremellomycetes;o__Filobasidiales;f__Filobasidiaceae	D_0__Bacteria;p__Firmicutes;D_2__Clostridia;D_3__Clostridiales;f__Family XIII;g__[Eubacterium] brachy group	-0.0185736450078298	0.625663494095677	0.912548797270739	1
k__Fungi;p__Ascomycota;c__Dothideomycetes;o__Capnodiales;f__Davidiellaceae;g__Davidiella	D_0__Bacteria;p__Firmicutes;D_2__Clostridia;D_3__Clostridiales;f__Family XIII;g__[Eubacterium] brachy group	-0.00373808507730181	0.525704179188542	0.912548797270739	1
k__Fungi;p__Ascomycota;c__Dothideomycetes;o__Pleosporales;f__Pleosporaceae;g__Alternaria	D_0__Bacteria;p__Firmicutes;D_2__Clostridia;D_3__Clostridiales;f__Family XIII;g__[Eubacterium] brachy group	-0.0583112328332277	0.842941435041275	0.912548797270739	1
k__Fungi;p__Ascomycota;c__Eurotiomycetes;o__Eurotiales;f__Trichocomaceae;g__Penicillium	D_0__Bacteria;p__Firmicutes;D_2__Clostridia;D_3__Clostridiales;f__Family XIII;g__[Eubacterium] brachy group	-0.0089423925041275	0.561291034419438	0.912548797270739	1
k__Fungi;p__Basidiomycota;c__Tremellomycetes;o__Filobasidiales;f__Filobasidiaceae;g__Filobasidium	D_0__Bacteria;p__Firmicutes;D_2__Clostridia;D_3__Clostridiales;f__Family XIII;g__[Eubacterium] brachy group	-0.0185736450078298	0.625663494095677	0.912548797270739	1
k__Fungi;p__Ascomycota;c__Dothideomycetes;o__Capnodiales;f__Davidiellaceae	D_0__Bacteria;p__Firmicutes;D_2__Clostridia;D_3__Clostridiales;f__Family XIII;g__[Eubacterium] nodatum group	0.0199654694904356	0.365271708363372	0.912548797270739	1
k__Fungi;p__Ascomycota;c__Eurotiomycetes;o__Eurotiales;f__Trichocomaceae	D_0__Bacteria;p__Firmicutes;D_2__Clostridia;D_3__Clostridiales;f__Family XIII;g__[Eubacterium] nodatum group	0.020949108678915	0.358909906653133	0.912548797270739	1
k__Fungi;p__Ascomycota;c__Saccharomycetes;o__Saccharomycetales;f__Incertae sedis	D_0__Bacteria;p__Firmicutes;D_2__Clostridia;D_3__Clostridiales;f__Family XIII;g__[Eubacterium] nodatum group	-0.0552089479555634	0.829700412784743	0.912548797270739	1
k__Fungi;p__Ascomycota;c__Saccharomycetes;o__Saccharomycetales;f__Saccharomycetaceae	D_0__Bacteria;p__Firmicutes;D_2__Clostridia;D_3__Clostridiales;f__Family XIII;g__[Eubacterium] nodatum group	-0.02873238931508	0.689941441105957	0.912548797270739	1
k__Fungi;p__Ascomycota;c__Sordariomycetes;o__Hypocreales;f__Cordycipitaceae	D_0__Bacteria;p__Firmicutes;D_2__Clostridia;D_3__Clostridiales;f__Family XIII;g__[Eubacterium] nodatum group	-0.0635927205746989	0.863891571325732	0.912548797270739	1
k__Fungi;p__Basidiomycota;c__Tremellomycetes;o__Filobasidiales;f__Filobasidiaceae	D_0__Bacteria;p__Firmicutes;D_2__Clostridia;D_3__Clostridiales;f__Family XIII;g__[Eubacterium] nodatum group	0.0224179162101463	0.349482745625056	0.912548797270739	-1
k__Fungi;p__Ascomycota;c__Dothideomycetes;o__Capnodiales;f__Davidiellaceae;g__Davidiella	D_0__Bacteria;p__Firmicutes;D_2__Clostridia;D_3__Clostridiales;f__Family XIII;g__[Eubacterium] nodatum group	0.0199654694904356	0.365271708363372	0.912548797270739	1
k__Fungi;p__Ascomycota;c__Eurotiomycetes;o__Eurotiales;f__Trichocomaceae;g__Penicillium	D_0__Bacteria;p__Firmicutes;D_2__Clostridia;D_3__Clostridiales;f__Family XIII;g__[Eubacterium] nodatum group	0.020949108678915	0.358909906653133	0.912548797270739	1
k__Fungi;p__Ascomycota;c__Saccharomycetes;o__Saccharomycetales;f__Incertae sedis;g__Candida	D_0__Bacteria;p__Firmicutes;D_2__Clostridia;D_3__Clostridiales;f__Family XIII;g__[Eubacterium] nodatum group	0.024585763138798	0.335737584958459	0.912548797270739	1
k__Fungi;p__Ascomycota;c__Saccharomycetes;o__Saccharomycetales;f__Saccharomycetaceae;g__Saccharomyces	D_0__Bacteria;p__Firmicutes;D_2__Clostridia;D_3__Clostridiales;f__Family XIII;g__[Eubacterium] nodatum group	-0.0278050115582136	0.684272230310926	0.912548797270739	1
k__Fungi;p__Basidiomycota;c__Tremellomycetes;o__Filobasidiales;f__Filobasidiaceae;g__Filobasidium	D_0__Bacteria;p__Firmicutes;D_2__Clostridia;D_3__Clostridiales;f__Family XIII;g__[Eubacterium] nodatum group	0.0224179162101463	0.349482745625056	0.912548797270739	-1
k__Fungi;p__Ascomycota;c__Dothideomycetes;o__Capnodiales;f__Davidiellaceae	D_0__Bacteria;p__Firmicutes;D_2__Clostridia;D_3__Clostridiales;f__Family XIII;Other	-0.023609698195275	0.658099408539212	0.912548797270739	1
k__Fungi;p__Ascomycota;c__Eurotiomycetes;o__Eurotiales;f__Trichocomaceae	D_0__Bacteria;p__Firmicutes;D_2__Clostridia;D_3__Clostridiales;f__Family XIII;Other	0.00376213530418082	0.474130674416692	0.912548797270739	1
k__Fungi;p__Ascomycota;c__Saccharomycetes;o__Saccharomycetales;f__Incertae sedis	D_0__Bacteria;p__Firmicutes;D_2__Clostridia;D_3__Clostridiales;f__Family XIII;Other	0.0320465312734365	0.290170384697988	0.912548797270739	-1
k__Fungi;p__Ascomycota;c__Sordariomycetes;o__Hypocreales;f__Cordycipitaceae	D_0__Bacteria;p__Firmicutes;D_2__Clostridia;D_3__Clostridiales;f__Family XIII;Other	0.0107636564208651	0.426356058665404	0.912548797270739	-1
k__Fungi;p__Ascomycota;c__Sordariomycetes;o__Hypocreales;f__Nectriaceae	D_0__Bacteria;p__Firmicutes;D_2__Clostridia;D_3__Clostridiales;f__Family XIII;Other	-0.0112267541600509	0.576774013665755	0.912548797270739	-1
k__Fungi;p__Basidiomycota;c__Tremellomycetes;o__Filobasidiales;f__Filobasidiaceae	D_0__Bacteria;p__Firmicutes;D_2__Clostridia;D_3__Clostridiales;f__Family XIII;Other	0.0331582771326591	0.283634582583997	0.912548797270739	-1
k__Fungi;p__Ascomycota;c__Dothideomycetes;o__Capnodiales;f__Davidiellaceae;g__Davidiella	D_0__Bacteria;p__Firmicutes;D_2__Clostridia;D_3__Clostridiales;f__Family XIII;Other	-0.023609698195275	0.658099408539212	0.912548797270739	1
k__Fungi;p__Ascomycota;c__Eurotiomycetes;o__Eurotiales;f__Trichocomaceae;g__Penicillium	D_0__Bacteria;p__Firmicutes;D_2__Clostridia;D_3__Clostridiales;f__Family XIII;Other	0.00376213530418082	0.474130674416692	0.912548797270739	1
k__Fungi;p__Ascomycota;c__Saccharomycetes;o__Saccharomycetales;f__Incertae sedis;g__Candida	D_0__Bacteria;p__Firmicutes;D_2__Clostridia;D_3__Clostridiales;f__Family XIII;Other	-0.0218196933599354	0.646688467133659	0.912548797270739	1
k__Fungi;p__Ascomycota;c__Saccharomycetes;o__Saccharomycetales;f__Incertae sedis;g__Debaryomyces	D_0__Bacteria;p__Firmicutes;D_2__Clostridia;D_3__Clostridiales;f__Family XIII;Other	-0.00044818442925355	0.50308394282747	0.912548797270739	-1
k__Fungi;p__Ascomycota;c__Sordariomycetes;o__Hypocreales;f__Nectriaceae;g__Fusarium	D_0__Bacteria;p__Firmicutes;D_2__Clostridia;D_3__Clostridiales;f__Family XIII;Other	-0.0112267541600509	0.576774013665755	0.912548797270739	-1
k__Fungi;p__Basidiomycota;c__Tremellomycetes;o__Filobasidiales;f__Filobasidiaceae;g__Filobasidium	D_0__Bacteria;p__Firmicutes;D_2__Clostridia;D_3__Clostridiales;f__Family XIII;Other	0.0331582771326591	0.283634582583997	0.912548797270739	-1
k__Fungi;p__Ascomycota;c__Dothideomycetes;o__Capnodiales;f__Davidiellaceae	D_0__Bacteria;p__Firmicutes;D_2__Clostridia;D_3__Clostridiales;f__Lachnospiraceae;g__Agathobacter	-0.0311336350969334	0.704410887762418	0.912548797270739	-1
k__Fungi;p__Ascomycota;c__Eurotiomycetes;o__Eurotiales;f__Trichocomaceae	D_0__Bacteria;p__Firmicutes;D_2__Clostridia;D_3__Clostridiales;f__Lachnospiraceae;g__Agathobacter	-0.0119601584292999	0.581721160216047	0.912548797270739	1
k__Fungi;p__Ascomycota;c__Saccharomycetes;o__Saccharomycetales;f__Saccharomycetaceae	D_0__Bacteria;p__Firmicutes;D_2__Clostridia;D_3__Clostridiales;f__Lachnospiraceae;g__Agathobacter	0.00560662711795253	0.46148033896103	0.912548797270739	1
k__Fungi;p__Basidiomycota;c__Tremellomycetes;o__Filobasidiales;f__Filobasidiaceae	D_0__Bacteria;p__Firmicutes;D_2__Clostridia;D_3__Clostridiales;f__Lachnospiraceae;g__Agathobacter	-0.0655491446472986	0.871145452039437	0.912548797270739	1
k__Fungi;p__Ascomycota;c__Dothideomycetes;o__Capnodiales;f__Davidiellaceae;g__Davidiella	D_0__Bacteria;p__Firmicutes;D_2__Clostridia;D_3__Clostridiales;f__Lachnospiraceae;g__Agathobacter	-0.0311336350969334	0.704410887762418	0.912548797270739	-1
k__Fungi;p__Ascomycota;c__Eurotiomycetes;o__Eurotiales;f__Trichocomaceae;g__Penicillium	D_0__Bacteria;p__Firmicutes;D_2__Clostridia;D_3__Clostridiales;f__Lachnospiraceae;g__Agathobacter	-0.0119601584292999	0.581721160216047	0.912548797270739	1
k__Fungi;p__Ascomycota;c__Saccharomycetes;o__Saccharomycetales;f__Incertae sedis;g__Candida	D_0__Bacteria;p__Firmicutes;D_2__Clostridia;D_3__Clostridiales;f__Lachnospiraceae;g__Agathobacter	-0.0493523037172449	0.802825675109723	0.912548797270739	-1
k__Fungi;p__Ascomycota;c__Saccharomycetes;o__Saccharomycetales;f__Incertae sedis;g__Debaryomyces	D_0__Bacteria;p__Firmicutes;D_2__Clostridia;D_3__Clostridiales;f__Lachnospiraceae;g__Agathobacter	0.00452211270221159	0.468914541398246	0.912548797270739	-1
k__Fungi;p__Ascomycota;c__Saccharomycetes;o__Saccharomycetales;f__Saccharomycetaceae;g__Saccharomyces	D_0__Bacteria;p__Firmicutes;D_2__Clostridia;D_3__Clostridiales;f__Lachnospiraceae;g__Agathobacter	-0.0108605543528935	0.574299262142924	0.912548797270739	-1
k__Fungi;p__Basidiomycota;c__Tremellomycetes;o__Filobasidiales;f__Filobasidiaceae;g__Filobasidium	D_0__Bacteria;p__Firmicutes;D_2__Clostridia;D_3__Clostridiales;f__Lachnospiraceae;g__Agathobacter	-0.0655491446472986	0.871145452039437	0.912548797270739	1
k__Fungi;p__Ascomycota;c__Dothideomycetes;o__Capnodiales;f__Davidiellaceae	D_0__Bacteria;p__Firmicutes;D_2__Clostridia;D_3__Clostridiales;f__Lachnospiraceae;g__Anaerostipes	-0.0665181819962696	0.874637762678241	0.912548797270739	-1
k__Fungi;p__Ascomycota;c__Eurotiomycetes;o__Eurotiales;f__Trichocomaceae	D_0__Bacteria;p__Firmicutes;D_2__Clostridia;D_3__Clostridiales;f__Lachnospiraceae;g__Anaerostipes	-0.0204973468044443	0.638172980288854	0.912548797270739	1
k__Fungi;p__Ascomycota;c__Saccharomycetes;o__Saccharomycetales;f__Saccharomycetaceae	D_0__Bacteria;p__Firmicutes;D_2__Clostridia;D_3__Clostridiales;f__Lachnospiraceae;g__Anaerostipes	-0.00895410353316963	0.561370669071949	0.912548797270739	-1
k__Fungi;p__Basidiomycota;c__Tremellomycetes;o__Filobasidiales;f__Filobasidiaceae	D_0__Bacteria;p__Firmicutes;D_2__Clostridia;D_3__Clostridiales;f__Lachnospiraceae;g__Anaerostipes	-0.0472308522681174	0.792493095427918	0.912548797270739	1
k__Fungi;p__Ascomycota;c__Dothideomycetes;o__Capnodiales;f__Davidiellaceae;g__Davidiella	D_0__Bacteria;p__Firmicutes;D_2__Clostridia;D_3__Clostridiales;f__Lachnospiraceae;g__Anaerostipes	-0.0665181819962696	0.874637762678241	0.912548797270739	-1
k__Fungi;p__Ascomycota;c__Eurotiomycetes;o__Eurotiales;f__Trichocomaceae;g__Penicillium	D_0__Bacteria;p__Firmicutes;D_2__Clostridia;D_3__Clostridiales;f__Lachnospiraceae;g__Anaerostipes	-0.0204973468044443	0.638172980288854	0.912548797270739	1
k__Fungi;p__Ascomycota;c__Saccharomycetes;o__Saccharomycetales;f__Incertae sedis;g__Candida	D_0__Bacteria;p__Firmicutes;D_2__Clostridia;D_3__Clostridiales;f__Lachnospiraceae;g__Anaerostipes	-0.0399525032187642	0.754709203594367	0.912548797270739	-1
k__Fungi;p__Ascomycota;c__Saccharomycetes;o__Saccharomycetales;f__Saccharomycetaceae;g__Saccharomyces	D_0__Bacteria;p__Firmicutes;D_2__Clostridia;D_3__Clostridiales;f__Lachnospiraceae;g__Anaerostipes	-0.0121089594745101	0.582723350019261	0.912548797270739	-1
k__Fungi;p__Basidiomycota;c__Tremellomycetes;o__Filobasidiales;f__Filobasidiaceae;g__Filobasidium	D_0__Bacteria;p__Firmicutes;D_2__Clostridia;D_3__Clostridiales;f__Lachnospiraceae;g__Anaerostipes	-0.0472308522681174	0.792493095427918	0.912548797270739	1
k__Fungi;p__Ascomycota;c__Dothideomycetes;o__Capnodiales;f__Davidiellaceae	D_0__Bacteria;p__Firmicutes;D_2__Clostridia;D_3__Clostridiales;f__Lachnospiraceae;g__Blautia	-0.0556595701636118	0.831666696287268	0.912548797270739	1
k__Fungi;p__Ascomycota;c__Eurotiomycetes;o__Eurotiales;f__Trichocomaceae	D_0__Bacteria;p__Firmicutes;D_2__Clostridia;D_3__Clostridiales;f__Lachnospiraceae;g__Blautia	-0.0400578990755119	0.755281376490591	0.912548797270739	1
k__Fungi;p__Ascomycota;c__Saccharomycetes;o__Saccharomycetales;f__Saccharomycetaceae	D_0__Bacteria;p__Firmicutes;D_2__Clostridia;D_3__Clostridiales;f__Lachnospiraceae;g__Blautia	-0.0464789237019705	0.78875573584717	0.912548797270739	1
k__Fungi;p__Basidiomycota;c__Tremellomycetes;o__Filobasidiales;f__Filobasidiaceae	D_0__Bacteria;p__Firmicutes;D_2__Clostridia;D_3__Clostridiales;f__Lachnospiraceae;g__Blautia	-0.0488838249625174	0.800570990519879	0.912548797270739	1
k__Fungi;p__Ascomycota;c__Dothideomycetes;o__Capnodiales;f__Davidiellaceae;g__Davidiella	D_0__Bacteria;p__Firmicutes;D_2__Clostridia;D_3__Clostridiales;f__Lachnospiraceae;g__Blautia	-0.0556595701636118	0.831666696287268	0.912548797270739	1
k__Fungi;p__Ascomycota;c__Eurotiomycetes;o__Eurotiales;f__Trichocomaceae;g__Penicillium	D_0__Bacteria;p__Firmicutes;D_2__Clostridia;D_3__Clostridiales;f__Lachnospiraceae;g__Blautia	-0.0400578990755119	0.755281376490591	0.912548797270739	1
k__Fungi;p__Ascomycota;c__Saccharomycetes;o__Saccharomycetales;f__Incertae sedis;g__Candida	D_0__Bacteria;p__Firmicutes;D_2__Clostridia;D_3__Clostridiales;f__Lachnospiraceae;g__Blautia	-0.0502426357618377	0.807068127166409	0.912548797270739	1
k__Fungi;p__Ascomycota;c__Saccharomycetes;o__Saccharomycetales;f__Incertae sedis;g__Debaryomyces	D_0__Bacteria;p__Firmicutes;D_2__Clostridia;D_3__Clostridiales;f__Lachnospiraceae;g__Blautia	-0.0115485910387885	0.578946481685377	0.912548797270739	-1
k__Fungi;p__Ascomycota;c__Saccharomycetes;o__Saccharomycetales;f__Saccharomycetaceae;g__Saccharomyces	D_0__Bacteria;p__Firmicutes;D_2__Clostridia;D_3__Clostridiales;f__Lachnospiraceae;g__Blautia	-0.0485729140663453	0.799066155991869	0.912548797270739	1
k__Fungi;p__Basidiomycota;c__Tremellomycetes;o__Filobasidiales;f__Filobasidiaceae;g__Filobasidium	D_0__Bacteria;p__Firmicutes;D_2__Clostridia;D_3__Clostridiales;f__Lachnospiraceae;g__Blautia	-0.0488838249625174	0.800570990519879	0.912548797270739	1
k__Fungi;p__Ascomycota;c__Eurotiomycetes;o__Eurotiales;f__Trichocomaceae	D_0__Bacteria;p__Firmicutes;D_2__Clostridia;D_3__Clostridiales;f__Lachnospiraceae;g__CAG-56	0.028625767252441	0.310708109726949	0.912548797270739	1
k__Fungi;p__Ascomycota;c__Saccharomycetes;o__Saccharomycetales;f__Incertae sedis	D_0__Bacteria;p__Firmicutes;D_2__Clostridia;D_3__Clostridiales;f__Lachnospiraceae;g__CAG-56	-0.00416192452174347	0.528613900543129	0.912548797270739	-1
k__Fungi;p__Ascomycota;c__Saccharomycetes;o__Saccharomycetales;f__Saccharomycetaceae	D_0__Bacteria;p__Firmicutes;D_2__Clostridia;D_3__Clostridiales;f__Lachnospiraceae;g__CAG-56	-0.0520790156946678	0.81564156204385	0.912548797270739	1
k__Fungi;p__Ascomycota;c__Sordariomycetes;o__Hypocreales;f__Cordycipitaceae	D_0__Bacteria;p__Firmicutes;D_2__Clostridia;D_3__Clostridiales;f__Lachnospiraceae;g__CAG-56	0.0113013113368129	0.422722500123882	0.912548797270739	-1
k__Fungi;p__Ascomycota;c__Sordariomycetes;o__Hypocreales;f__Nectriaceae	D_0__Bacteria;p__Firmicutes;D_2__Clostridia;D_3__Clostridiales;f__Lachnospiraceae;g__CAG-56	0.0177795481580243	0.379539877565898	0.912548797270739	-1
k__Fungi;p__Ascomycota;c__Eurotiomycetes;o__Eurotiales;f__Trichocomaceae;g__Penicillium	D_0__Bacteria;p__Firmicutes;D_2__Clostridia;D_3__Clostridiales;f__Lachnospiraceae;g__CAG-56	0.028625767252441	0.310708109726949	0.912548797270739	1
k__Fungi;p__Ascomycota;c__Saccharomycetes;o__Saccharomycetales;f__Saccharomycetaceae;g__Saccharomyces	D_0__Bacteria;p__Firmicutes;D_2__Clostridia;D_3__Clostridiales;f__Lachnospiraceae;g__CAG-56	-0.0485512169185479	0.798960887587637	0.912548797270739	1
k__Fungi;p__Ascomycota;c__Sordariomycetes;o__Hypocreales;f__Nectriaceae;g__Fusarium	D_0__Bacteria;p__Firmicutes;D_2__Clostridia;D_3__Clostridiales;f__Lachnospiraceae;g__CAG-56	0.0177795481580243	0.379539877565898	0.912548797270739	-1
k__Fungi;p__Ascomycota;c__Dothideomycetes;o__Capnodiales;f__Davidiellaceae	D_0__Bacteria;p__Firmicutes;D_2__Clostridia;D_3__Clostridiales;f__Lachnospiraceae;g__Coprococcus 1	-0.0194392849622064	0.631309795907076	0.912548797270739	-1
k__Fungi;p__Ascomycota;c__Dothideomycetes;o__Pleosporales;f__Pleosporaceae	D_0__Bacteria;p__Firmicutes;D_2__Clostridia;D_3__Clostridiales;f__Lachnospiraceae;g__Coprococcus 1	0.0439067078893945	0.224322134518014	0.912548797270739	-1
k__Fungi;p__Ascomycota;c__Eurotiomycetes;o__Eurotiales;f__Trichocomaceae	D_0__Bacteria;p__Firmicutes;D_2__Clostridia;D_3__Clostridiales;f__Lachnospiraceae;g__Coprococcus 1	-0.0311510356558944	0.704514604644104	0.912548797270739	1
k__Fungi;p__Ascomycota;c__Saccharomycetes;o__Saccharomycetales;f__Incertae sedis	D_0__Bacteria;p__Firmicutes;D_2__Clostridia;D_3__Clostridiales;f__Lachnospiraceae;g__Coprococcus 1	-0.0346697969752541	0.725137237833392	0.912548797270739	-1
k__Fungi;p__Ascomycota;c__Saccharomycetes;o__Saccharomycetales;f__Saccharomycetaceae	D_0__Bacteria;p__Firmicutes;D_2__Clostridia;D_3__Clostridiales;f__Lachnospiraceae;g__Coprococcus 1	0.00173311918314762	0.488076110692994	0.912548797270739	1
k__Fungi;p__Basidiomycota;c__Tremellomycetes;o__Filobasidiales;f__Filobasidiaceae	D_0__Bacteria;p__Firmicutes;D_2__Clostridia;D_3__Clostridiales;f__Lachnospiraceae;g__Coprococcus 1	-0.0574728765415953	0.839431479041612	0.912548797270739	1
k__Fungi;p__Ascomycota;c__Dothideomycetes;o__Capnodiales;f__Davidiellaceae;g__Davidiella	D_0__Bacteria;p__Firmicutes;D_2__Clostridia;D_3__Clostridiales;f__Lachnospiraceae;g__Coprococcus 1	-0.0194392849622064	0.631309795907076	0.912548797270739	-1
k__Fungi;p__Ascomycota;c__Dothideomycetes;o__Pleosporales;f__Pleosporaceae;g__Alternaria	D_0__Bacteria;p__Firmicutes;D_2__Clostridia;D_3__Clostridiales;f__Lachnospiraceae;g__Coprococcus 1	0.0439067078893945	0.224322134518014	0.912548797270739	-1
k__Fungi;p__Ascomycota;c__Eurotiomycetes;o__Eurotiales;f__Trichocomaceae;g__Penicillium	D_0__Bacteria;p__Firmicutes;D_2__Clostridia;D_3__Clostridiales;f__Lachnospiraceae;g__Coprococcus 1	-0.0311510356558944	0.704514604644104	0.912548797270739	1
k__Fungi;p__Ascomycota;c__Saccharomycetes;o__Saccharomycetales;f__Incertae sedis;g__Candida	D_0__Bacteria;p__Firmicutes;D_2__Clostridia;D_3__Clostridiales;f__Lachnospiraceae;g__Coprococcus 1	-0.0150042610827664	0.602109493752924	0.912548797270739	-1
k__Fungi;p__Ascomycota;c__Saccharomycetes;o__Saccharomycetales;f__Incertae sedis;g__Debaryomyces	D_0__Bacteria;p__Firmicutes;D_2__Clostridia;D_3__Clostridiales;f__Lachnospiraceae;g__Coprococcus 1	0.00146911671685549	0.48989203061337	0.912548797270739	1
k__Fungi;p__Ascomycota;c__Saccharomycetes;o__Saccharomycetales;f__Saccharomycetaceae;g__Saccharomyces	D_0__Bacteria;p__Firmicutes;D_2__Clostridia;D_3__Clostridiales;f__Lachnospiraceae;g__Coprococcus 1	-0.0182918186319228	0.623819358854176	0.912548797270739	1
k__Fungi;p__Basidiomycota;c__Tremellomycetes;o__Filobasidiales;f__Filobasidiaceae;g__Filobasidium	D_0__Bacteria;p__Firmicutes;D_2__Clostridia;D_3__Clostridiales;f__Lachnospiraceae;g__Coprococcus 1	-0.0574728765415953	0.839431479041612	0.912548797270739	1
k__Fungi;p__Ascomycota;c__Dothideomycetes;o__Capnodiales;f__Davidiellaceae	D_0__Bacteria;p__Firmicutes;D_2__Clostridia;D_3__Clostridiales;f__Lachnospiraceae;g__Coprococcus 2	-0.0182099410906802	0.623283062060702	0.912548797270739	-1
k__Fungi;p__Ascomycota;c__Saccharomycetes;o__Saccharomycetales;f__Incertae sedis	D_0__Bacteria;p__Firmicutes;D_2__Clostridia;D_3__Clostridiales;f__Lachnospiraceae;g__Coprococcus 2	-0.0372698673606379	0.739907937486161	0.912548797270739	-1
k__Fungi;p__Ascomycota;c__Saccharomycetes;o__Saccharomycetales;f__Saccharomycetaceae	D_0__Bacteria;p__Firmicutes;D_2__Clostridia;D_3__Clostridiales;f__Lachnospiraceae;g__Coprococcus 2	0.0127533043217025	0.412943171688286	0.912548797270739	1
k__Fungi;p__Ascomycota;c__Sordariomycetes;o__Hypocreales;f__Nectriaceae	D_0__Bacteria;p__Firmicutes;D_2__Clostridia;D_3__Clostridiales;f__Lachnospiraceae;g__Coprococcus 2	0.0404570049825076	0.242558452965333	0.912548797270739	-1
k__Fungi;p__Basidiomycota;c__Tremellomycetes;o__Filobasidiales;f__Filobasidiaceae	D_0__Bacteria;p__Firmicutes;D_2__Clostridia;D_3__Clostridiales;f__Lachnospiraceae;g__Coprococcus 2	-0.0663667021456337	0.874096223698721	0.912548797270739	-1
k__Fungi;p__Ascomycota;c__Dothideomycetes;o__Capnodiales;f__Davidiellaceae;g__Davidiella	D_0__Bacteria;p__Firmicutes;D_2__Clostridia;D_3__Clostridiales;f__Lachnospiraceae;g__Coprococcus 2	-0.0182099410906802	0.623283062060702	0.912548797270739	-1
k__Fungi;p__Ascomycota;c__Saccharomycetes;o__Saccharomycetales;f__Incertae sedis;g__Candida	D_0__Bacteria;p__Firmicutes;D_2__Clostridia;D_3__Clostridiales;f__Lachnospiraceae;g__Coprococcus 2	-0.029196174717868	0.692759984605043	0.912548797270739	1
k__Fungi;p__Ascomycota;c__Saccharomycetes;o__Saccharomycetales;f__Incertae sedis;g__Debaryomyces	D_0__Bacteria;p__Firmicutes;D_2__Clostridia;D_3__Clostridiales;f__Lachnospiraceae;g__Coprococcus 2	-0.0659212155606089	0.872494215694773	0.912548797270739	-1
k__Fungi;p__Ascomycota;c__Saccharomycetes;o__Saccharomycetales;f__Saccharomycetaceae;g__Saccharomyces	D_0__Bacteria;p__Firmicutes;D_2__Clostridia;D_3__Clostridiales;f__Lachnospiraceae;g__Coprococcus 2	-0.0226237916836259	0.651831420127928	0.912548797270739	1
k__Fungi;p__Ascomycota;c__Sordariomycetes;o__Hypocreales;f__Nectriaceae;g__Fusarium	D_0__Bacteria;p__Firmicutes;D_2__Clostridia;D_3__Clostridiales;f__Lachnospiraceae;g__Coprococcus 2	0.0404570049825076	0.242558452965333	0.912548797270739	-1
k__Fungi;p__Basidiomycota;c__Tremellomycetes;o__Filobasidiales;f__Filobasidiaceae;g__Filobasidium	D_0__Bacteria;p__Firmicutes;D_2__Clostridia;D_3__Clostridiales;f__Lachnospiraceae;g__Coprococcus 2	-0.0663667021456337	0.874096223698721	0.912548797270739	-1
k__Fungi;p__Ascomycota;c__Dothideomycetes;o__Capnodiales;f__Davidiellaceae	D_0__Bacteria;p__Firmicutes;D_2__Clostridia;D_3__Clostridiales;f__Lachnospiraceae;g__Coprococcus 3	0.00246183873980713	0.483065061503228	0.912548797270739	-1
k__Fungi;p__Ascomycota;c__Eurotiomycetes;o__Eurotiales;f__Trichocomaceae	D_0__Bacteria;p__Firmicutes;D_2__Clostridia;D_3__Clostridiales;f__Lachnospiraceae;g__Coprococcus 3	-0.0522175632654737	0.816278681392387	0.912548797270739	1
k__Fungi;p__Ascomycota;c__Saccharomycetes;o__Saccharomycetales;f__Incertae sedis	D_0__Bacteria;p__Firmicutes;D_2__Clostridia;D_3__Clostridiales;f__Lachnospiraceae;g__Coprococcus 3	-0.00782718628945171	0.553696809069536	0.912548797270739	-1
k__Fungi;p__Ascomycota;c__Saccharomycetes;o__Saccharomycetales;f__Saccharomycetaceae	D_0__Bacteria;p__Firmicutes;D_2__Clostridia;D_3__Clostridiales;f__Lachnospiraceae;g__Coprococcus 3	-0.0216798631943381	0.645791365397685	0.912548797270739	1
k__Fungi;p__Basidiomycota;c__Tremellomycetes;o__Filobasidiales;f__Filobasidiaceae	D_0__Bacteria;p__Firmicutes;D_2__Clostridia;D_3__Clostridiales;f__Lachnospiraceae;g__Coprococcus 3	-0.0508151161594227	0.809766474625742	0.912548797270739	-1
k__Fungi;p__Ascomycota;c__Dothideomycetes;o__Capnodiales;f__Davidiellaceae;g__Davidiella	D_0__Bacteria;p__Firmicutes;D_2__Clostridia;D_3__Clostridiales;f__Lachnospiraceae;g__Coprococcus 3	0.00246183873980713	0.483065061503228	0.912548797270739	-1
k__Fungi;p__Ascomycota;c__Eurotiomycetes;o__Eurotiales;f__Trichocomaceae;g__Penicillium	D_0__Bacteria;p__Firmicutes;D_2__Clostridia;D_3__Clostridiales;f__Lachnospiraceae;g__Coprococcus 3	-0.0522175632654737	0.816278681392387	0.912548797270739	1
k__Fungi;p__Ascomycota;c__Saccharomycetes;o__Saccharomycetales;f__Incertae sedis;g__Candida	D_0__Bacteria;p__Firmicutes;D_2__Clostridia;D_3__Clostridiales;f__Lachnospiraceae;g__Coprococcus 3	-0.0353400230414966	0.72898373711577	0.912548797270739	-1
k__Fungi;p__Ascomycota;c__Saccharomycetes;o__Saccharomycetales;f__Incertae sedis;g__Debaryomyces	D_0__Bacteria;p__Firmicutes;D_2__Clostridia;D_3__Clostridiales;f__Lachnospiraceae;g__Coprococcus 3	-0.0161659642339528	0.609820803524127	0.912548797270739	1
k__Fungi;p__Ascomycota;c__Saccharomycetes;o__Saccharomycetales;f__Saccharomycetaceae;g__Saccharomyces	D_0__Bacteria;p__Firmicutes;D_2__Clostridia;D_3__Clostridiales;f__Lachnospiraceae;g__Coprococcus 3	-0.0354630112404462	0.729686667366174	0.912548797270739	1
k__Fungi;p__Basidiomycota;c__Tremellomycetes;o__Filobasidiales;f__Filobasidiaceae;g__Filobasidium	D_0__Bacteria;p__Firmicutes;D_2__Clostridia;D_3__Clostridiales;f__Lachnospiraceae;g__Coprococcus 3	-0.0508151161594227	0.809766474625742	0.912548797270739	-1
k__Fungi;p__Ascomycota;c__Dothideomycetes;o__Capnodiales;f__Davidiellaceae	D_0__Bacteria;p__Firmicutes;D_2__Clostridia;D_3__Clostridiales;f__Lachnospiraceae;g__Dorea	-0.00883175932988098	0.5605386107083	0.912548797270739	-1
k__Fungi;p__Ascomycota;c__Eurotiomycetes;o__Eurotiales;f__Trichocomaceae	D_0__Bacteria;p__Firmicutes;D_2__Clostridia;D_3__Clostridiales;f__Lachnospiraceae;g__Dorea	-0.00673777774539261	0.546259266579479	0.912548797270739	1
k__Fungi;p__Ascomycota;c__Saccharomycetes;o__Saccharomycetales;f__Incertae sedis	D_0__Bacteria;p__Firmicutes;D_2__Clostridia;D_3__Clostridiales;f__Lachnospiraceae;g__Dorea	-0.0156056285585913	0.606106494481994	0.912548797270739	1
k__Fungi;p__Ascomycota;c__Saccharomycetes;o__Saccharomycetales;f__Saccharomycetaceae	D_0__Bacteria;p__Firmicutes;D_2__Clostridia;D_3__Clostridiales;f__Lachnospiraceae;g__Dorea	-0.0420540636414889	0.765981911874182	0.912548797270739	1
k__Fungi;p__Basidiomycota;c__Tremellomycetes;o__Filobasidiales;f__Filobasidiaceae	D_0__Bacteria;p__Firmicutes;D_2__Clostridia;D_3__Clostridiales;f__Lachnospiraceae;g__Dorea	-0.0618564995197644	0.857225371125655	0.912548797270739	1
k__Fungi;p__Ascomycota;c__Dothideomycetes;o__Capnodiales;f__Davidiellaceae;g__Davidiella	D_0__Bacteria;p__Firmicutes;D_2__Clostridia;D_3__Clostridiales;f__Lachnospiraceae;g__Dorea	-0.00883175932988098	0.5605386107083	0.912548797270739	-1
k__Fungi;p__Ascomycota;c__Eurotiomycetes;o__Eurotiales;f__Trichocomaceae;g__Penicillium	D_0__Bacteria;p__Firmicutes;D_2__Clostridia;D_3__Clostridiales;f__Lachnospiraceae;g__Dorea	-0.00673777774539261	0.546259266579479	0.912548797270739	1
k__Fungi;p__Ascomycota;c__Saccharomycetes;o__Saccharomycetales;f__Incertae sedis;g__Candida	D_0__Bacteria;p__Firmicutes;D_2__Clostridia;D_3__Clostridiales;f__Lachnospiraceae;g__Dorea	-0.0158392229568157	0.607656115379509	0.912548797270739	-1
k__Fungi;p__Ascomycota;c__Saccharomycetes;o__Saccharomycetales;f__Incertae sedis;g__Debaryomyces	D_0__Bacteria;p__Firmicutes;D_2__Clostridia;D_3__Clostridiales;f__Lachnospiraceae;g__Dorea	-0.0630929698276414	0.861994887943182	0.912548797270739	-1
k__Fungi;p__Ascomycota;c__Saccharomycetes;o__Saccharomycetales;f__Saccharomycetaceae;g__Saccharomyces	D_0__Bacteria;p__Firmicutes;D_2__Clostridia;D_3__Clostridiales;f__Lachnospiraceae;g__Dorea	-0.0530881024590447	0.820250610099958	0.912548797270739	1
k__Fungi;p__Basidiomycota;c__Tremellomycetes;o__Filobasidiales;f__Filobasidiaceae;g__Filobasidium	D_0__Bacteria;p__Firmicutes;D_2__Clostridia;D_3__Clostridiales;f__Lachnospiraceae;g__Dorea	-0.0618564995197644	0.857225371125655	0.912548797270739	1
k__Fungi;p__Ascomycota;c__Dothideomycetes;o__Capnodiales;f__Davidiellaceae	D_0__Bacteria;p__Firmicutes;D_2__Clostridia;D_3__Clostridiales;f__Lachnospiraceae;g__Eisenbergiella	-0.0198506476934264	0.633983218866055	0.912548797270739	1
k__Fungi;p__Ascomycota;c__Dothideomycetes;o__Pleosporales;f__Pleosporaceae	D_0__Bacteria;p__Firmicutes;D_2__Clostridia;D_3__Clostridiales;f__Lachnospiraceae;g__Eisenbergiella	-0.0643280697520042	0.866649999636379	0.912548797270739	-1
k__Fungi;p__Ascomycota;c__Eurotiomycetes;o__Eurotiales;f__Trichocomaceae	D_0__Bacteria;p__Firmicutes;D_2__Clostridia;D_3__Clostridiales;f__Lachnospiraceae;g__Eisenbergiella	0.0165777502188625	0.387455905840848	0.912548797270739	-1
k__Fungi;p__Ascomycota;c__Saccharomycetes;o__Saccharomycetales;f__Incertae sedis	D_0__Bacteria;p__Firmicutes;D_2__Clostridia;D_3__Clostridiales;f__Lachnospiraceae;g__Eisenbergiella	0.00248829556121741	0.482883176132821	0.912548797270739	-1
k__Fungi;p__Ascomycota;c__Sordariomycetes;o__Hypocreales;f__Cordycipitaceae	D_0__Bacteria;p__Firmicutes;D_2__Clostridia;D_3__Clostridiales;f__Lachnospiraceae;g__Eisenbergiella	-0.0289921022844461	0.691521166023134	0.912548797270739	-1
k__Fungi;p__Basidiomycota;c__Tremellomycetes;o__Filobasidiales;f__Filobasidiaceae	D_0__Bacteria;p__Firmicutes;D_2__Clostridia;D_3__Clostridiales;f__Lachnospiraceae;g__Eisenbergiella	-0.0361737553820684	0.733731026692047	0.912548797270739	1
k__Fungi;p__Ascomycota;c__Dothideomycetes;o__Capnodiales;f__Davidiellaceae;g__Davidiella	D_0__Bacteria;p__Firmicutes;D_2__Clostridia;D_3__Clostridiales;f__Lachnospiraceae;g__Eisenbergiella	-0.0198506476934264	0.633983218866055	0.912548797270739	1
k__Fungi;p__Ascomycota;c__Dothideomycetes;o__Pleosporales;f__Pleosporaceae;g__Alternaria	D_0__Bacteria;p__Firmicutes;D_2__Clostridia;D_3__Clostridiales;f__Lachnospiraceae;g__Eisenbergiella	-0.0643280697520042	0.866649999636379	0.912548797270739	-1
k__Fungi;p__Ascomycota;c__Eurotiomycetes;o__Eurotiales;f__Trichocomaceae;g__Penicillium	D_0__Bacteria;p__Firmicutes;D_2__Clostridia;D_3__Clostridiales;f__Lachnospiraceae;g__Eisenbergiella	0.0165777502188625	0.387455905840848	0.912548797270739	-1
k__Fungi;p__Ascomycota;c__Saccharomycetes;o__Saccharomycetales;f__Incertae sedis;g__Candida	D_0__Bacteria;p__Firmicutes;D_2__Clostridia;D_3__Clostridiales;f__Lachnospiraceae;g__Eisenbergiella	-0.0407705237739951	0.759131242642859	0.912548797270739	1
k__Fungi;p__Basidiomycota;c__Tremellomycetes;o__Filobasidiales;f__Filobasidiaceae;g__Filobasidium	D_0__Bacteria;p__Firmicutes;D_2__Clostridia;D_3__Clostridiales;f__Lachnospiraceae;g__Eisenbergiella	-0.0361737553820684	0.733731026692047	0.912548797270739	1
k__Fungi;p__Ascomycota;c__Dothideomycetes;o__Capnodiales;f__Davidiellaceae	D_0__Bacteria;p__Firmicutes;D_2__Clostridia;D_3__Clostridiales;f__Lachnospiraceae;g__Fusicatenibacter	0.00648200329337075	0.455489381321731	0.912548797270739	-1
k__Fungi;p__Ascomycota;c__Eurotiomycetes;o__Eurotiales;f__Trichocomaceae	D_0__Bacteria;p__Firmicutes;D_2__Clostridia;D_3__Clostridiales;f__Lachnospiraceae;g__Fusicatenibacter	-0.003898613008915	0.526806396426142	0.912548797270739	1
k__Fungi;p__Ascomycota;c__Sordariomycetes;o__Hypocreales;f__Nectriaceae	D_0__Bacteria;p__Firmicutes;D_2__Clostridia;D_3__Clostridiales;f__Lachnospiraceae;g__Fusicatenibacter	0.0016137862146074	0.488896904791516	0.912548797270739	-1
k__Fungi;p__Basidiomycota;c__Tremellomycetes;o__Filobasidiales;f__Filobasidiaceae	D_0__Bacteria;p__Firmicutes;D_2__Clostridia;D_3__Clostridiales;f__Lachnospiraceae;g__Fusicatenibacter	-0.0632536059600787	0.862606489758795	0.912548797270739	1
[truncated: 1,074 more rows]

## Sheet: IBD_only
tab1	tab2	Dcor_coef	Dcor_pvalue	Dcor_AdjPval	spearm_sign
[truncated: 2,822 more rows]

## Sheet: PSC_IBD
tab1	tab2	Dcor_coef	Dcor_pvalue	Dcor_AdjPval	spearm_sign
[truncated: 2,970 more rows]

[truncated: 1 more sheets: PSC_only]
